# Supplementary material for: Research on the Mechanism of HRP Relieving IPEC-J2 Cells Immunological Stress Based on Transcriptome Sequencing Analysis
Source: Front Nutr. 2022 Jul 15;9:944390. doi: 10.3389/fnut.2022.944390 (PMC9336541; doi:10.3389/fnut.2022.944390)
Supplement: Supplementary file 4 [file Table_4.XLSX]

## Sheet: 2
					Table S4：DEGs were identified in L vs. H6-L
id	L-1_count	L-2_count	L-3_count	H6-L-1_count	H6-L-2_count	H6-L-3_count	L-1_fpkm	L-2_fpkm	L-3_fpkm	H6-L-1_fpkm	H6-L-2_fpkm	H6-L-3_fpkm	L_mean	H6-L_mean	log2(fc)	PValue	FDR	Symbol	Description	KEGG_A_class	KEGG_B_class	Pathway	K_ID	GO Component	GO Function	GO Process
LOC733688	1997	2526	2379	790	702	717	125.23	134.29	127.51	37.72	35.42	39.68	129.01	37.6067	-1.77842	4.98886e-221	6.01856e-217	TXNIP	thioredoxin-interacting protein [Sus scrofa]	Organismal Systems	Immune system	ko04621//NOD-like receptor signaling pathway	K20910	-	-	-
LOC407060	20347	23451	23945	16558	15129	14474	937.64	916.11	943.11	580.89	560.94	588.61	932.287	576.813	-0.692669	2.77941e-217	1.47669e-213	HSPA5	PREDICTED: 78 kDa glucose-regulated protein [Equus asinus]	Genetic Information Processing;Organismal Systems;Organismal Systems;Human Diseases;Genetic Information Processing	Folding, sorting and degradation;Immune system;Endocrine system;Neurodegenerative diseases;Folding, sorting and degradation	ko04141//Protein processing in endoplasmic reticulum;ko04612//Antigen processing and presentation;ko04918//Thyroid hormone synthesis;ko05020//Prion diseases;ko03060//Protein export	K09490;K09490;K09490;K09490;K09490	-	-	-
LOC100522839	897	1073	1049	3622	3620	3150	104.5	105.97	104.45	321.23	339.32	323.85	104.973	328.133	1.64426	3.67214e-217	1.47669e-213	ID1	DNA-binding protein inhibitor ID-1 [Sus scrofa]	Environmental Information Processing;Environmental Information Processing;Cellular Processes;Environmental Information Processing	Signal transduction;Signal transduction;Cellular community - eukaryotes;Signal transduction	ko04015//Rap1 signaling pathway;ko04390//Hippo signaling pathway;ko04550//Signaling pathways regulating pluripotency of stem cells;ko04350//TGF-beta signaling pathway	K04680;K04680;K04680;K04680	-	-	-
LOC100156071	6013	7075	6963	4190	4001	3416	234.13	233.53	231.73	124.2	125.34	117.38	233.13	122.307	-0.930632	1.90057e-165	5.73212e-162	NDRG1	PREDICTED: protein NDRG1 [Vicugna pacos]	-	-	-	-	-	-	-
LOC100155736	4700	5656	5616	3663	3376	3226	165.91	165.15	165.46	98.69	95.31	95.97	165.507	96.6567	-0.775948	1.71966e-130	4.14921e-127	LIPG	endothelial lipase precursor [Sus scrofa]	Metabolism;Metabolism;Organismal Systems	Global and overview maps;Lipid metabolism;Digestive system	ko01100//Metabolic pathways;ko00561//Glycerolipid metabolism;ko04979//Cholesterol metabolism	K22284;K22284;K22284	-	-	-
LOC396966	37526	43912	42759	31965	31254	27124	1401.22	1389.98	1364.09	908.47	939.11	893.71	1385.1	913.763	-0.600094	6.92027e-127	1.39144e-123	ubq-1	polyubiquitin-C [Cricetulus griseus]	Organismal Systems	Endocrine system	ko03320//PPAR signaling pathway	K08770	-	-	-
LOC396648	13603	15681	15220	11666	11125	9889	821.16	802.46	785.28	536.13	540.34	526.8	802.967	534.423	-0.587357	7.87213e-114	1.35671e-110	HSPA1B	heat shock 70 kDa protein 1B [Sus scrofa]	Environmental Information Processing;Cellular Processes;Human Diseases;Human Diseases;Genetic Information Processing;Human Diseases;Organismal Systems;Genetic Information Processing;Human Diseases;Organismal Systems;Human Diseases;Organismal Systems;Human Diseases	Signal transduction;Transport and catabolism;Infectious diseases;Infectious diseases;Folding, sorting and degradation;Infectious diseases;Endocrine system;Transcription;Infectious diseases;Immune system;Infectious diseases;Aging;Neurodegenerative diseases	ko04010//MAPK signaling pathway;ko04144//Endocytosis;ko05169//Epstein-Barr virus infection;ko05164//Influenza A;ko04141//Protein processing in endoplasmic reticulum;ko05162//Measles;ko04915//Estrogen signaling pathway;ko03040//Spliceosome;ko05145//Toxoplasmosis;ko04612//Antigen processing and presentation;ko05134//Legionellosis;ko04213//Longevity regulating pathway - multiple species;ko05020//Pri…	K03283;K03283;K03283;K03283;K03283;K03283;K03283;K03283;K03283;K03283;K03283;K03283;K03283	-	-	-
LOC100517736	4320	5288	5306	3474	3245	2831	197.05	204.47	206.86	120.63	119.09	113.95	202.793	117.89	-0.782569	5.94678e-105	8.96774e-102	SRXN1	PREDICTED: sulfiredoxin-1 [Sus scrofa]	-	-	-	-	-	-	-
LOC100624186	3762	4313	4287	8265	7764	6902	213.97	207.89	208.44	357.8	355.22	346.44	210.1	353.153	0.749219	2.83127e-95	3.79516e-92	Gprc5a	PREDICTED: retinoic acid-induced protein 3 [Sus scrofa]	-	-	-	-	-	-	-
LOC100518718	2847	3212	3202	2075	1984	1730	151.38	144.77	145.5	84.02	84.88	81.19	147.217	83.3633	-0.820456	3.78868e-88	4.57066e-85	Sqstm1	PREDICTED: sequestosome-1 isoform X1 [Sus scrofa]	Cellular Processes;Cellular Processes;Human Diseases;Organismal Systems;Cellular Processes	Cell growth and death;Cell growth and death;Cardiovascular diseases;Development;Transport and catabolism	ko04217//Necroptosis;ko04218//Cellular senescence;ko05418//Fluid shear stress and atherosclerosis;ko04380//Osteoclast differentiation;ko04137//Mitophagy - animal	K14381;K14381;K14381;K14381;K14381	-	-	-
LOC110256870	7121	8506	8308	6432	6175	5580	230.06	232.95	229.41	158.2	160.53	159.09	230.807	159.273	-0.53518	2.02829e-87	2.22448e-84	LOXL2	PREDICTED: lysyl oxidase homolog 2 [Vicugna pacos]	-	-	-	-	-	-	-
LOC100622579	2498	2823	2832	1805	1720	1499	111.01	106.51	107.36	60.86	61.54	58.81	108.293	60.4033	-0.842244	1.40782e-84	1.41533e-81	HERPUD1	PREDICTED: homocysteine-responsive endoplasmic reticulum-resident ubiquitin-like domain member 1 protein [Sus scrofa]	Genetic Information Processing	Folding, sorting and degradation	ko04141//Protein processing in endoplasmic reticulum	K14027	-	-	-
LOC100625219	2562	3071	3053	1941	1872	1610	365.49	371.39	372.25	210.8	214.87	202.69	369.71	209.453	-0.819765	2.47092e-84	2.29301e-81	BLVRB	PREDICTED: flavin reductase (NADPH) [Sus scrofa]	Metabolism;Metabolism;Metabolism	Global and overview maps;Metabolism of cofactors and vitamins;Metabolism of cofactors and vitamins	ko01100//Metabolic pathways;ko00860//Porphyrin and chlorophyll metabolism;ko00740//Riboflavin metabolism	K05901;K05901;K05901	-	-	-
LOC100627510	488	585	540	1585	1518	1489	11.28	11.47	10.67	27.9	28.24	30.38	11.14	28.84	1.37232	2.88247e-83	2.48386e-80	CDH6	PREDICTED: cadherin-6 [Sus scrofa]	-	-	-	-	-	-	-
LOC397410	3592	4186	4142	2957	2665	2337	341.2	337.07	336.28	213.83	203.68	195.9	338.183	204.47	-0.725916	9.74703e-81	7.83921e-78	NPC2	epididymal secretory protein E1 precursor [Sus scrofa]	Cellular Processes;Organismal Systems	Transport and catabolism;Digestive system	ko04142//Lysosome;ko04979//Cholesterol metabolism	K13443;K13443	-	-	-
LOC100153821	3642	4530	4361	3106	2912	2631	236.43	249.29	241.97	153.5	152.1	150.72	242.563	152.107	-0.673278	8.16878e-80	6.15926e-77	DDIT4	DNA damage-inducible transcript 4 protein [Sus scrofa]	Environmental Information Processing;Human Diseases;Environmental Information Processing;Cellular Processes	Signal transduction;Cancers;Signal transduction;Transport and catabolism	ko04151//PI3K-Akt signaling pathway;ko05206//MicroRNAs in cancer;ko04150//mTOR signaling pathway;ko04140//Autophagy - animal	K08270;K08270;K08270;K08270	-	-	-
LOC396670	14507	16708	16897	14484	12885	12440	308.21	301.4	306.92	234.04	220.93	233.79	305.51	229.587	-0.412181	1.05886e-72	7.5142e-70	SCD	acyl-CoA desaturase [Sus scrofa]	Environmental Information Processing;Organismal Systems;Metabolism;Metabolism	Signal transduction;Endocrine system;Global and overview maps;Lipid metabolism	ko04152//AMPK signaling pathway;ko03320//PPAR signaling pathway;ko01212//Fatty acid metabolism;ko01040//Biosynthesis of unsaturated fatty acids	K00507;K00507;K00507;K00507	-	-	-
LOC100152373	1804	2167	2075	1327	1209	1153	88.33	89.5	86.8	49.36	47.65	49.57	88.21	48.86	-0.852288	9.32677e-72	6.25101e-69	CREG1	PREDICTED: protein CREG1 isoform X1 [Sus scrofa]	-	-	-	-	-	-	-
LOC100154530	893	1036	1123	2400	2324	2100	26.37	25.94	28.35	53.96	55.22	54.73	26.8867	54.6367	1.02298	4.8481e-71	3.07829e-68	TGM2	PREDICTED: protein-glutamine gamma-glutamyltransferase 2 [Sus scrofa]	Human Diseases	Neurodegenerative diseases	ko05016//Huntington disease	K05625	-	-	-
LOC396985	5589	6945	6929	5096	4951	4395	273.6	288.21	289.92	189.92	195.01	189.87	283.91	191.6	-0.567336	1.10389e-70	6.65865e-68	PLAU	RecName: Full=Urokinase-type plasminogen activator; Short=U-plasminogen activator; Short=uPA; Contains: RecName: Full=Urokinase-type plasminogen activator long chain A; Contains: RecName: Full=Urokinase-type plasminogen activator short chain A; Contains: RecName: Full=Urokinase-type plasminogen activator chain B; Flags: Precursor	Human Diseases;Human Diseases;Human Diseases;Human Diseases;Environmental Information Processing;Organismal Systems	Cancers;Cancers;Cancers;Cancers;Signal transduction;Immune system	ko05205//Proteoglycans in cancer;ko05202//Transcriptional misregulation in cancers;ko05206//MicroRNAs in cancer;ko05215//Prostate cancer;ko04064//NF-kappa B signaling pathway;ko04610//Complement and coagulation cascades	K01348;K01348;K01348;K01348;K01348;K01348	-	-	-
LOC396945	3840	4405	4232	7709	7282	6623	150.93	146.78	142.17	230.68	230.29	229.73	146.627	230.233	0.650949	1.72956e-68	9.93594e-66	SERPINE1	plasminogen activator inhibitor 1 precursor [Sus scrofa]	Cellular Processes;Environmental Information Processing;Environmental Information Processing;Human Diseases;Environmental Information Processing;Human Diseases;Organismal Systems;Cellular Processes	Cell growth and death;Signal transduction;Signal transduction;Infectious diseases;Signal transduction;Endocrine and metabolic diseases;Immune system;Cell growth and death	ko04218//Cellular senescence;ko04390//Hippo signaling pathway;ko04371//Apelin signaling pathway;ko05142//Chagas disease (American trypanosomiasis);ko04066//HIF-1 signaling pathway;ko04933//AGE-RAGE signaling pathway in diabetic complications;ko04610//Complement and coagulation cascades;ko04115//p53 signaling pathway	K03982;K03982;K03982;K03982;K03982;K03982;K03982;K03982	-	-	-
LOC493184	7558	9526	8475	6337	6215	5370	1408.23	1504.64	1349.66	898.88	931.71	882.97	1420.84	904.52	-0.651523	1.8152e-68	9.95387e-66	HSPB1	heat shock protein beta-1 [Sus scrofa]	Environmental Information Processing;Human Diseases;Human Diseases;Environmental Information Processing	Signal transduction;Infectious diseases;Infectious diseases;Signal transduction	ko04010//MAPK signaling pathway;ko05169//Epstein-Barr virus infection;ko05146//Amoebiasis;ko04370//VEGF signaling pathway	K04455;K04455;K04455;K04455	-	-	-
LOC100620701	1863	2158	2135	1277	1327	1171	104.41	103.33	102.57	54.71	59.29	57.55	103.437	57.1833	-0.855081	9.67198e-65	5.07317e-62	ECM1	PREDICTED: extracellular matrix protein 1 [Sus scrofa]	-	-	-	-	-	-	-
LOC100145895	980	1182	1139	563	585	480	187.09	191.3	185.86	81.83	89.86	80.87	188.083	84.1867	-1.15971	1.16017e-63	5.83177e-61	ISG15	ubiquitin-like protein ISG15 [Sus scrofa]	Human Diseases;Organismal Systems	Infectious diseases;Immune system	ko05165//Human papillomavirus infection;ko04622//RIG-I-like receptor signaling pathway	K12159;K12159	-	-	-
LOC100520726	631	793	762	1800	1632	1603	19.5	20.77	20.12	42.34	40.57	43.71	20.13	42.2067	1.06812	3.96683e-61	1.91424e-58	EGR1	PREDICTED: early growth response protein 1 [Sus scrofa]	Human Diseases;Environmental Information Processing;Human Diseases;Organismal Systems;Organismal Systems;Human Diseases	Infectious diseases;Signal transduction;Endocrine and metabolic diseases;Endocrine system;Endocrine system;Neurodegenerative diseases	ko05166//HTLV-I infection;ko04371//Apelin signaling pathway;ko04933//AGE-RAGE signaling pathway in diabetic complications;ko04928//Parathyroid hormone synthesis, secretion and action;ko04912//GnRH signaling pathway;ko05020//Prion diseases	K09203;K09203;K09203;K09203;K09203;K09203	-	-	-
LOC100515885	2760	3284	3239	5605	5423	4880	41.9	42.26	42.03	64.78	66.24	65.37	42.0633	65.4633	0.638124	3.63842e-58	1.68823e-55	SLC26A2	PREDICTED: sulfate transporter [Camelus ferus]	-	-	-	-	-	-	-
LOC407608	6100	7404	7233	6059	5655	5160	402.51	414.16	407.93	304.37	300.23	300.47	408.2	301.69	-0.436209	4.92082e-58	2.19869e-55	PGK1	phosphoglycerate kinase 1 [Sus scrofa]	Metabolism;Metabolism;Environmental Information Processing;Metabolism;Metabolism	Global and overview maps;Global and overview maps;Signal transduction;Global and overview maps;Carbohydrate metabolism	ko01100//Metabolic pathways;ko01200//Carbon metabolism;ko04066//HIF-1 signaling pathway;ko01230//Biosynthesis of amino acids;ko00010//Glycolysis / Gluconeogenesis	K00927;K00927;K00927;K00927;K00927	-	-	-
LOC733649	1570	1955	1930	1225	1107	931	70.52	74.77	75.17	42.59	40.33	36.84	73.4867	39.92	-0.880371	8.74941e-58	3.76975e-55	TAP1	PREDICTED: antigen peptide transporter 1 [Sus scrofa]	Human Diseases;Human Diseases;Cellular Processes;Organismal Systems;Environmental Information Processing;Human Diseases	Infectious diseases;Infectious diseases;Transport and catabolism;Immune system;Membrane transport;Immune diseases	ko05163//Human cytomegalovirus infection;ko05168//Herpes simplex infection;ko04145//Phagosome;ko04612//Antigen processing and presentation;ko02010//ABC transporters;ko05340//Primary immunodeficiency	K05653;K05653;K05653;K05653;K05653;K05653	-	-	-
LOC100512476	6527	7869	7911	6554	6221	5669	595.69	622.42	615.88	448.52	458.33	459.72	611.33	455.523	-0.424426	8.111e-55	3.37417e-52	PRDX1	PREDICTED: peroxiredoxin-1 isoform X1 [Ovis aries musimon]	Human Diseases;Cellular Processes	Infectious diseases;Transport and catabolism	ko05146//Amoebiasis;ko04146//Peroxisome	K13279;K13279	-	-	-
LOC100153541	2046	2504	2552	1799	1671	1558	155.25	160.8	165.09	103.69	101.82	103.93	160.38	103.147	-0.636797	1.10472e-49	4.44246e-47	AIFM2	PREDICTED: apoptosis-inducing factor 2 isoform X1 [Sus scrofa]	Cellular Processes	Cell growth and death	ko04115//p53 signaling pathway	K22745	-	-	-
LOC808511	11843	12603	13305	22852	19970	20311	756.14	682.14	726.06	1110.76	1025.87	1144.41	721.447	1093.68	0.600226	1.37521e-49	5.35178e-47	MT-ND5	NADH dehydrogenase subunit 5 (mitochondrion) [Sus scrofa]	Metabolism;Organismal Systems;Organismal Systems;Human Diseases;Metabolism	Global and overview maps;Environmental adaptation;Nervous system;Neurodegenerative diseases;Energy metabolism	ko01100//Metabolic pathways;ko04714//Thermogenesis;ko04723//Retrograde endocannabinoid signaling;ko05012//Parkinson disease;ko00190//Oxidative phosphorylation	K03883;K03883;K03883;K03883;K03883	-	-	-
LOC397035	80129	93018	96508	82554	81622	71646	9974.6	9815.84	10268	7823.4	8174.97	7870.52	10019.5	7956.3	-0.332639	1.69267e-48	6.38136e-46	FTL	ferritin light chain [Sus scrofa]	Cellular Processes;Organismal Systems;Cellular Processes	Cell growth and death;Digestive system;Cell growth and death	ko04217//Necroptosis;ko04978//Mineral absorption;ko04216//Ferroptosis	K13625;K13625;K13625	-	-	-
LOC100521617	1896	2231	2194	3937	3579	3409	140.1	139.73	138.64	221.51	212.91	222.35	139.49	218.923	0.650264	4.19462e-48	1.53345e-45	MAL	PREDICTED: myelin and lymphocyte protein isoform X1 [Sus scrofa]	-	-	-	-	-	-	-
LOC100622986	1676	2003	1937	1340	1309	1194	90.63	91.77	89.63	54.46	56.4	56.28	90.6767	55.7133	-0.702709	1.55742e-47	5.5261e-45	G6PD	PREDICTED: glucose-6-phosphate 1-dehydrogenase [Camelus dromedarius]	Metabolism;Metabolism;Human Diseases;Metabolism;Metabolism	Global and overview maps;Global and overview maps;Cancers;Metabolism of other amino acids;Carbohydrate metabolism	ko01100//Metabolic pathways;ko01200//Carbon metabolism;ko05230//Central carbon metabolism in cancer;ko00480//Glutathione metabolism;ko00030//Pentose phosphate pathway	K00036;K00036;K00036;K00036;K00036	-	-	-
LOC733669	3104	3725	3789	3013	2646	2477	249.41	253.73	260.21	184.3	171.06	175.64	254.45	177	-0.523633	1.32915e-46	4.5814e-44	GADD45A	growth arrest and DNA damage-inducible protein GADD45 alpha [Bos taurus]	Human Diseases;Environmental Information Processing;Human Diseases;Human Diseases;Cellular Processes;Human Diseases;Human Diseases;Cellular Processes;Environmental Information Processing;Cellular Processes;Environmental Information Processing;Human Diseases;Human Diseases;Human Diseases;Cellular Processes;Human Diseases;Human Diseases;Human Diseases;Human Diseases;Human Diseases;Human Diseases;Hu…	Cancers;Signal transduction;Cancers;Cancers;Cell growth and death;Cancers;Cancers;Cell growth and death;Signal transduction;Cell growth and death;Signal transduction;Cancers;Cancers;Cancers;Cell growth and death;Cancers;Cancers;Cancers;Cancers;Cancers;Cancers;Cancers	ko05200//Pathways in cancer;ko04010//MAPK signaling pathway;ko05202//Transcriptional misregulation in cancers;ko05225//Hepatocellular carcinoma;ko04218//Cellular senescence;ko05226//Gastric cancer;ko05224//Breast cancer;ko04210//Apoptosis;ko04068//FoxO signaling pathway;ko04110//Cell cycle;ko04064//NF-kappa B signaling pathway;ko05222//Small cell lung cancer;ko05210//Colorectal cancer;ko05220//Ch…	K04402;K04402;K04402;K04402;K04402;K04402;K04402;K04402;K04402;K04402;K04402;K04402;K04402;K04402;K04402;K04402;K04402;K04402;K04402;K04402;K04402;K04402	-	-	-
LOC100516832	159	208	182	639	645	546	1.29	1.43	1.26	3.95	4.22	3.92	1.32667	4.03	1.60297	3.60293e-46	1.20738e-43	B3galt5	PREDICTED: beta-1,3-galactosyltransferase 5 [Sus scrofa]	Metabolism;Metabolism;Metabolism	Global and overview maps;Glycan biosynthesis and metabolism;Glycan biosynthesis and metabolism	ko01100//Metabolic pathways;ko00601//Glycosphingolipid biosynthesis - lacto and neolacto series;ko00603//Glycosphingolipid biosynthesis - globo and isoglobo series	K03877;K03877;K03877	-	-	-
LOC100521185	269	420	369	91	98	88	20.1	26.59	23.57	5.17	5.89	5.82	23.42	5.62667	-2.05739	2.82056e-45	9.19655e-43	ZFAND2A	PREDICTED: AN1-type zinc finger protein 2A [Sus scrofa]	-	-	-	-	-	-	-
LOC100522185	626	750	667	1631	1537	1326	44	44.37	40.04	86.54	85.95	80.97	42.8033	84.4867	0.981001	1.3682e-44	4.34366e-42	FUS	RNA-binding protein FUS [Sus scrofa]	Human Diseases	Cancers	ko05202//Transcriptional misregulation in cancers	K13098	-	-	-
LOC100523358	1133	1358	1375	2508	2533	2234	24.62	25.02	25.54	41.49	44.29	42.84	25.06	42.8733	0.774694	7.29178e-44	2.25559e-41	JUNB	PREDICTED: LOW QUALITY PROTEIN: transcription factor jun-B [Sus scrofa]	Organismal Systems;Environmental Information Processing	Development;Signal transduction	ko04380//Osteoclast differentiation;ko04668//TNF signaling pathway	K09028;K09028	-	-	-
LOC100514210	6451	7892	7669	6390	6339	5655	616.8	639.68	626.72	465.13	487.66	477.15	627.733	476.647	-0.397232	4.80231e-43	1.44838e-40	Taldo1	transaldolase [Sus scrofa]	Metabolism;Metabolism;Metabolism;Metabolism	Global and overview maps;Global and overview maps;Global and overview maps;Carbohydrate metabolism	ko01100//Metabolic pathways;ko01200//Carbon metabolism;ko01230//Biosynthesis of amino acids;ko00030//Pentose phosphate pathway	K00616;K00616;K00616;K00616	GO:0031988//membrane-bounded vesicle;GO:0043231//intracellular membrane-bounded organelle;GO:0044444//cytoplasmic part	GO:0016744//transferase activity, transferring aldehyde or ketonic groups;GO:0030246//carbohydrate binding	GO:0005997//xylulose metabolic process;GO:0006739//NADP metabolic process;GO:0015980//energy derivation by oxidation of organic compounds;GO:0019682//glyceraldehyde-3-phosphate metabolic process;GO:0051704//multi-organism process
LOC100157582	11410	13425	13667	11900	11284	9706	1146.58	1143.64	1173.84	910.37	912.34	860.73	1154.69	894.48	-0.36838	6.23572e-43	1.83482e-40	TPI1	triosephosphate isomerase 1 [Sus scrofa]	Metabolism;Metabolism;Metabolism;Metabolism;Metabolism;Metabolism	Global and overview maps;Global and overview maps;Carbohydrate metabolism;Global and overview maps;Carbohydrate metabolism;Carbohydrate metabolism	ko01100//Metabolic pathways;ko01200//Carbon metabolism;ko00562//Inositol phosphate metabolism;ko01230//Biosynthesis of amino acids;ko00010//Glycolysis / Gluconeogenesis;ko00051//Fructose and mannose metabolism	K01803;K01803;K01803;K01803;K01803;K01803	-	-	-
LOC100156112	4963	5883	6164	5126	4624	4257	419.66	421.7	445.48	329.97	314.59	317.66	428.947	320.74	-0.419394	6.10475e-42	1.75352e-39	ATP6V1E1	PREDICTED: V-type proton ATPase subunit E 1 [Sus scrofa]	Metabolism;Human Diseases;Cellular Processes;Environmental Information Processing;Metabolism;Human Diseases;Human Diseases;Organismal Systems;Human Diseases;Organismal Systems	Global and overview maps;Infectious diseases;Transport and catabolism;Signal transduction;Energy metabolism;Immune diseases;Infectious diseases;Nervous system;Infectious diseases;Excretory system	ko01100//Metabolic pathways;ko05165//Human papillomavirus infection;ko04145//Phagosome;ko04150//mTOR signaling pathway;ko00190//Oxidative phosphorylation;ko05323//Rheumatoid arthritis;ko05120//Epithelial cell signaling in Helicobacter pylori infection;ko04721//Synaptic vesicle cycle;ko05110//Vibrio cholerae infection;ko04966//Collecting duct acid secretion	K02150;K02150;K02150;K02150;K02150;K02150;K02150;K02150;K02150;K02150	-	-	-
LOC100522394	17882	20610	20811	19501	18073	16215	712.42	696.22	708.61	591.72	579.65	570.18	705.75	580.517	-0.28182	9.01758e-42	2.52996e-39	VIM	PREDICTED: vimentin isoform X1 [Sus scrofa]	Human Diseases;Human Diseases	Infectious diseases;Cancers	ko05169//Epstein-Barr virus infection;ko05206//MicroRNAs in cancer	K07606;K07606	-	-	-
LOC397191	10631	12219	12413	10664	9732	9822	419.83	405.09	417.85	317.97	307.43	339.32	414.257	321.573	-0.365377	2.13747e-41	5.86057e-39	HSP90B1	endoplasmin precursor [Sus scrofa]	Human Diseases;Environmental Information Processing;Genetic Information Processing;Human Diseases;Organismal Systems;Human Diseases;Organismal Systems;Organismal Systems	Cancers;Signal transduction;Folding, sorting and degradation;Cardiovascular diseases;Endocrine system;Cancers;Immune system;Endocrine system	ko05200//Pathways in cancer;ko04151//PI3K-Akt signaling pathway;ko04141//Protein processing in endoplasmic reticulum;ko05418//Fluid shear stress and atherosclerosis;ko04915//Estrogen signaling pathway;ko05215//Prostate cancer;ko04657//IL-17 signaling pathway;ko04918//Thyroid hormone synthesis	K09487;K09487;K09487;K09487;K09487;K09487;K09487;K09487	-	-	-
LOC396823	113447	135832	132687	122688	119636	104640	10102	10254.4	10098.4	8317.19	8571.13	8222.48	10151.6	8370.27	-0.278357	8.98519e-41	2.40883e-38	GAPDH	glyceraldehyde-3-phosphate dehydrogenase [Sus scrofa]	Metabolism;Human Diseases;Metabolism;Environmental Information Processing;Metabolism;Metabolism	Global and overview maps;Neurodegenerative diseases;Global and overview maps;Signal transduction;Global and overview maps;Carbohydrate metabolism	ko01100//Metabolic pathways;ko05010//Alzheimer disease;ko01200//Carbon metabolism;ko04066//HIF-1 signaling pathway;ko01230//Biosynthesis of amino acids;ko00010//Glycolysis / Gluconeogenesis	K00134;K00134;K00134;K00134;K00134;K00134	-	-	-
LOC403166	232	202	232	731	675	611	5.75	4.29	4.97	13.91	13.64	13.38	5.00333	13.6433	1.44723	6.86249e-40	1.79976e-37	A2M	PREDICTED: LOW QUALITY PROTEIN: alpha-2-macroglobulin [Sus scrofa]	Organismal Systems	Immune system	ko04610//Complement and coagulation cascades	K03910	-	-	-
LOC100517077	6854	8508	8198	7375	6712	6252	232.01	244.19	237.16	190.01	182.79	186.72	237.787	186.507	-0.350441	2.88265e-39	7.3992e-37	Mknk2	PREDICTED: MAP kinase-interacting serine/threonine-protein kinase 2 [Camelus bactrianus]	Environmental Information Processing;Organismal Systems;Environmental Information Processing	Signal transduction;Endocrine system;Signal transduction	ko04010//MAPK signaling pathway;ko04910//Insulin signaling pathway;ko04066//HIF-1 signaling pathway	K04372;K04372;K04372	-	-	-
LOC100156780	614	651	694	295	348	281	81.03	72.83	78.28	29.64	36.95	32.73	77.38	33.1067	-1.22484	3.61267e-39	9.07985e-37	SDF2L1	PREDICTED: stromal cell-derived factor 2-like protein 1 [Sus scrofa]	-	-	-	-	-	-	-
LOC396681	2077	2367	2269	1802	1684	1547	69.75	67.39	65.13	46.07	45.5	45.85	67.4233	45.8067	-0.55769	5.32733e-38	1.31161e-35	TXNRD1	thioredoxin reductase 1, cytoplasmic [Sus scrofa]	Human Diseases;Human Diseases;Metabolism	Cancers;Cancers;Metabolism of other amino acids	ko05200//Pathways in cancer;ko05225//Hepatocellular carcinoma;ko00450//Selenocompound metabolism	K22182;K22182;K22182	-	-	-
LOC100517950	11146	13332	13223	12035	11597	10351	702.8	711.72	711.33	578.1	590.04	576.52	708.617	581.553	-0.285094	7.5179e-38	1.81392e-35	TINAGL1	PREDICTED: tubulointerstitial nephritis antigen-like isoform X1 [Sus scrofa]	-	-	-	-	-	-	-
LOC100627292	2444	2793	2763	2287	2014	1907	72.06	69.76	69.6	51.44	47.62	49.64	70.4733	49.5667	-0.507707	1.02885e-37	2.43374e-35	Palld	PREDICTED: palladin isoform X1 [Rhinolophus sinicus]	-	-	-	-	-	-	-
LOC100286741	520	648	602	327	290	264	22.47	23.73	22.23	10.76	10.08	10.07	22.81	10.3033	-1.14656	1.22764e-37	2.84812e-35	FSCN1	fascin [Sus scrofa]	Human Diseases	Cancers	ko05206//MicroRNAs in cancer	K17455	-	-	-
LOC100381266	16509	19106	18943	17786	16900	14916	1000.75	981.81	981.45	820.79	824.26	797.93	988.003	814.327	-0.278908	2.19445e-37	4.99505e-35	CALR	calreticulin precursor [Sus scrofa]	Human Diseases;Human Diseases;Genetic Information Processing;Cellular Processes;Human Diseases;Organismal Systems	Infectious diseases;Infectious diseases;Folding, sorting and degradation;Transport and catabolism;Infectious diseases;Immune system	ko05166//HTLV-I infection;ko05163//Human cytomegalovirus infection;ko04141//Protein processing in endoplasmic reticulum;ko04145//Phagosome;ko05142//Chagas disease (American trypanosomiasis);ko04612//Antigen processing and presentation	K08057;K08057;K08057;K08057;K08057;K08057	-	-	-
LOC397639	1057	1284	1239	811	799	740	74.78	77.04	74.92	43.71	45.51	46.21	75.58	45.1433	-0.743492	8.19214e-37	1.83018e-34	EPHX1	epoxide hydrolase 1 precursor [Sus scrofa]	Organismal Systems;Human Diseases;Metabolism	Digestive system;Cancers;Xenobiotics biodegradation and metabolism	ko04976//Bile secretion;ko05204//Chemical carcinogenesis;ko00980//Metabolism of xenobiotics by cytochrome P450	K01253;K01253;K01253	-	-	-
LOC100153791	15543	18530	18177	17120	16334	14501	932.95	942.87	932.53	782.31	788.84	768.12	936.117	779.757	-0.263664	1.2309e-35	2.69992e-33	CYR61	PREDICTED: protein CYR61 [Sus scrofa]	-	-	-	-	-	-	-
LOC100514115	2631	3269	2947	5114	4858	4452	72.43	76.31	69.37	107.23	107.67	108.17	72.7033	107.69	0.566791	3.69998e-35	7.97081e-33	FGFR3	PREDICTED: fibroblast growth factor receptor 3 isoform X2 [Orcinus orca]	Human Diseases;Environmental Information Processing;Environmental Information Processing;Cellular Processes;Environmental Information Processing;Cellular Processes;Environmental Information Processing;Human Diseases;Cellular Processes;Human Diseases;Human Diseases;Human Diseases	Cancers;Signal transduction;Signal transduction;Transport and catabolism;Signal transduction;Cell motility;Signal transduction;Cancers;Cellular community - eukaryotes;Drug resistance;Cancers;Cancers	ko05200//Pathways in cancer;ko04151//PI3K-Akt signaling pathway;ko04010//MAPK signaling pathway;ko04144//Endocytosis;ko04014//Ras signaling pathway;ko04810//Regulation of actin cytoskeleton;ko04015//Rap1 signaling pathway;ko05206//MicroRNAs in cancer;ko04550//Signaling pathways regulating pluripotency of stem cells;ko01521//EGFR tyrosine kinase inhibitor resistance;ko05230//Central carbon metabol…	K05094;K05094;K05094;K05094;K05094;K05094;K05094;K05094;K05094;K05094;K05094;K05094	GO:0000323//lytic vacuole;GO:0005886//plasma membrane;GO:0005924//cell-substrate adherens junction;GO:0016021//integral component of membrane;GO:0016023//cytoplasmic, membrane-bounded vesicle	GO:0004714//transmembrane receptor protein tyrosine kinase activity;GO:0019838//growth factor binding;GO:0032550//purine ribonucleoside binding	GO:0001934//positive regulation of protein phosphorylation;GO:0001936//regulation of endothelial cell proliferation;GO:0002064//epithelial cell development;GO:0006357//regulation of transcription from RNA polymerase II promoter;GO:0006952//defense response;GO:0007088//regulation of mitotic nuclear division;GO:0007409//axonogenesis;GO:0008285//negative regulation of cell proliferation;GO:0008543//…
LOC396906	261	329	353	119	112	102	12.05	12.88	13.93	4.18	4.16	4.16	12.9533	4.16667	-1.63636	1.73063e-34	3.66287e-32	HSPA6	heat shock 70 kDa protein [Sus scrofa]	Environmental Information Processing;Cellular Processes;Human Diseases;Human Diseases;Genetic Information Processing;Human Diseases;Organismal Systems;Genetic Information Processing;Human Diseases;Organismal Systems;Human Diseases;Organismal Systems;Human Diseases	Signal transduction;Transport and catabolism;Infectious diseases;Infectious diseases;Folding, sorting and degradation;Infectious diseases;Endocrine system;Transcription;Infectious diseases;Immune system;Infectious diseases;Aging;Neurodegenerative diseases	ko04010//MAPK signaling pathway;ko04144//Endocytosis;ko05169//Epstein-Barr virus infection;ko05164//Influenza A;ko04141//Protein processing in endoplasmic reticulum;ko05162//Measles;ko04915//Estrogen signaling pathway;ko03040//Spliceosome;ko05145//Toxoplasmosis;ko04612//Antigen processing and presentation;ko05134//Legionellosis;ko04213//Longevity regulating pathway - multiple species;ko05020//Pri…	K03283;K03283;K03283;K03283;K03283;K03283;K03283;K03283;K03283;K03283;K03283;K03283;K03283	-	-	-
LOC733654	956	1076	1235	741	673	652	59.15	56.44	65.31	34.91	33.51	35.6	60.3	34.6733	-0.798331	2.08789e-33	4.34282e-31	CTH	cystathionine gamma-lyase [Sus scrofa]	Metabolism;Metabolism;Metabolism;Metabolism;Metabolism	Global and overview maps;Global and overview maps;Amino acid metabolism;Amino acid metabolism;Metabolism of other amino acids	ko01100//Metabolic pathways;ko01230//Biosynthesis of amino acids;ko00270//Cysteine and methionine metabolism;ko00260//Glycine, serine and threonine metabolism;ko00450//Selenocompound metabolism	K01758;K01758;K01758;K01758;K01758	-	-	-
LOC100513633	2105	2449	2450	1962	1871	1618	159.34	157.42	159.05	112.9	114.03	107.73	158.603	111.553	-0.507689	2.36901e-33	4.84402e-31	SDCBP2	PREDICTED: syntenin-2 isoform X1 [Sus scrofa]	-	-	-	-	-	-	-
LOC808513	6556	7341	7658	12437	10620	10140	668.63	634.68	667.54	965.64	871.46	912.62	656.95	916.573	0.480467	2.84432e-33	5.71897e-31	MT-CYB	cytochrome b (mitochondrion) [Sus scrofa]	Metabolism;Organismal Systems;Human Diseases;Human Diseases;Human Diseases;Human Diseases;Metabolism;Organismal Systems	Global and overview maps;Environmental adaptation;Neurodegenerative diseases;Neurodegenerative diseases;Endocrine and metabolic diseases;Neurodegenerative diseases;Energy metabolism;Circulatory system	ko01100//Metabolic pathways;ko04714//Thermogenesis;ko05016//Huntington disease;ko05010//Alzheimer disease;ko04932//Non-alcoholic fatty liver disease (NAFLD);ko05012//Parkinson disease;ko00190//Oxidative phosphorylation;ko04260//Cardiac muscle contraction	K00412;K00412;K00412;K00412;K00412;K00412;K00412;K00412	-	-	-
LOC110260403	7866	8806	8541	13405	12789	11487	61.3	58.2	56.89	79.48	80.16	78.96	58.7967	79.5333	0.435825	1.27041e-32	2.5125e-30	Plec	PREDICTED: plectin isoform X1 [Ceratotherium simum simum]	-	-	-	-	-	-	-
LOC100152781	1300	1623	1556	1173	1064	987	66.45	70.4	68	45.62	43.85	44.58	68.2833	44.6833	-0.611797	1.84539e-32	3.59077e-30	SMOX	PREDICTED: spermine oxidase isoform X3 [Physeter catodon]	Metabolism;Metabolism	Amino acid metabolism;Metabolism of other amino acids	ko00330//Arginine and proline metabolism;ko00410//beta-Alanine metabolism	K12259;K12259	-	-	-
LOC100155428	4263	5105	4967	4382	4212	3864	142.54	144.7	141.96	111.55	113.33	114.01	143.067	112.963	-0.340833	1.04701e-31	2.00495e-29	TAPBP	PREDICTED: tapasin [Sus scrofa]	Human Diseases;Organismal Systems	Infectious diseases;Immune system	ko05163//Human cytomegalovirus infection;ko04612//Antigen processing and presentation	K08058;K08058	-	-	-
LOC100520025	1255	1472	1495	1069	1049	870	99.13	98.56	100.93	64.28	66.66	60.64	99.54	63.86	-0.640364	3.74029e-31	7.05045e-29	CRELD2	PREDICTED: cysteine-rich with EGF-like domain protein 2 [Sus scrofa]	-	-	-	-	-	-	-
LOC100623151	1655	2014	1851	3310	3171	2765	39.75	41	38	60.52	61.28	58.6	39.5833	60.1333	0.603272	8.91324e-31	1.6543e-28	INF2	PREDICTED: inverted formin-2 isoform X3 [Ovis aries musimon]	-	-	-	-	-	-	-
LOC100155895	636	727	624	390	358	344	17.42	16.91	14.6	8.13	7.81	8.3	16.31	8.08	-1.01333	1.26477e-30	2.31185e-28	ARRDC4	PREDICTED: arrestin domain-containing protein 4 [Sus scrofa]	-	-	-	-	-	-	-
LOC100516870	3851	4692	4528	3939	3851	3396	103.29	105.39	104.55	82.33	84.07	81.44	104.41	82.6133	-0.337813	9.82692e-30	1.71814e-27	HYOU1	PREDICTED: hypoxia up-regulated protein 1 isoform X4 [Sus scrofa]	Genetic Information Processing	Folding, sorting and degradation	ko04141//Protein processing in endoplasmic reticulum	K09486	-	-	-
LOC397630	1115	1262	1278	2228	2121	1915	36.75	35.26	36	55.9	56.24	55.69	36.0033	55.9433	0.635836	1.52316e-29	2.62505e-27	PC	pyruvate carboxylase, mitochondrial [Sus scrofa]	Metabolism;Metabolism;Metabolism;Metabolism;Metabolism	Global and overview maps;Global and overview maps;Global and overview maps;Carbohydrate metabolism;Carbohydrate metabolism	ko01100//Metabolic pathways;ko01200//Carbon metabolism;ko01230//Biosynthesis of amino acids;ko00620//Pyruvate metabolism;ko00020//Citrate cycle (TCA cycle)	K01958;K01958;K01958;K01958;K01958	-	-	-
LOC100462751	870	1045	938	662	637	562	57.34	58.39	52.84	33.22	33.78	32.69	56.19	33.23	-0.757827	3.91688e-29	6.65538e-27	GABARAPL1	PREDICTED: gamma-aminobutyric acid receptor-associated protein-like 1 [Sus scrofa]	Human Diseases;Organismal Systems;Environmental Information Processing;Cellular Processes;Environmental Information Processing;Organismal Systems;Cellular Processes;Cellular Processes	Infectious diseases;Immune system;Signal transduction;Transport and catabolism;Signal transduction;Nervous system;Transport and catabolism;Transport and catabolism	ko05167//Kaposi sarcoma-associated herpesvirus infection;ko04621//NOD-like receptor signaling pathway;ko04371//Apelin signaling pathway;ko04140//Autophagy - animal;ko04068//FoxO signaling pathway;ko04727//GABAergic synapse;ko04137//Mitophagy - animal;ko04136//Autophagy - other eukaryotes	K08341;K08341;K08341;K08341;K08341;K08341;K08341;K08341	-	-	-
LOC100513626	450	529	448	1138	1045	893	14.79	14.46	12.17	26.75	25.52	26.82	13.8067	26.3633	0.933168	1.94659e-28	3.26163e-26	ABCC5	PREDICTED: multidrug resistance-associated protein 5 isoform X1 [Vicugna pacos]	Environmental Information Processing;Human Diseases	Membrane transport;Drug resistance	ko02010//ABC transporters;ko01523//Antifolate resistance	K05668;K05668	-	-	-
LOC445512	382	496	429	168	228	161	28.67	31.56	27.52	9.6	13.77	10.66	29.25	11.3433	-1.36659	2.61956e-28	4.3291e-26	HMOX1	heme oxygenase 1 [Sus scrofa]	Metabolism;Human Diseases;Human Diseases;Human Diseases;Human Diseases;Environmental Information Processing;Organismal Systems;Cellular Processes;Metabolism	Global and overview maps;Cancers;Cancers;Cancers;Cardiovascular diseases;Signal transduction;Digestive system;Cell growth and death;Metabolism of cofactors and vitamins	ko01100//Metabolic pathways;ko05200//Pathways in cancer;ko05206//MicroRNAs in cancer;ko05225//Hepatocellular carcinoma;ko05418//Fluid shear stress and atherosclerosis;ko04066//HIF-1 signaling pathway;ko04978//Mineral absorption;ko04216//Ferroptosis;ko00860//Porphyrin and chlorophyll metabolism	K00510;K00510;K00510;K00510;K00510;K00510;K00510;K00510;K00510	-	-	-
LOC407245	4177	4979	5085	4476	4230	3877	287.83	290.98	299.59	234.91	234.31	236.05	292.8	235.09	-0.316702	3.23638e-28	5.27618e-26	LDHA	PREDICTED: L-lactate dehydrogenase A chain isoform X1 [Sus scrofa]	Metabolism;Environmental Information Processing;Organismal Systems;Human Diseases;Metabolism;Metabolism;Metabolism;Metabolism	Global and overview maps;Signal transduction;Endocrine system;Cancers;Carbohydrate metabolism;Amino acid metabolism;Carbohydrate metabolism;Carbohydrate metabolism	ko01100//Metabolic pathways;ko04066//HIF-1 signaling pathway;ko04922//Glucagon signaling pathway;ko05230//Central carbon metabolism in cancer;ko00010//Glycolysis / Gluconeogenesis;ko00270//Cysteine and methionine metabolism;ko00620//Pyruvate metabolism;ko00640//Propanoate metabolism	K00016;K00016;K00016;K00016;K00016;K00016;K00016;K00016	-	-	-
LOC100517731	1237	1435	1380	1065	947	947	41.82	42.03	41.97	27.78	23.51	27.3	41.94	26.1967	-0.678944	4.19587e-28	6.7492e-26	Tfcp2l1	PREDICTED: transcription factor CP2-like protein 1 isoform X1 [Sus scrofa]	-	-	-	-	-	-	-
LOC100622156	551	583	563	334	313	297	15.12	14.34	13.77	7.12	7.09	7.59	14.41	7.26667	-0.987705	4.42822e-28	7.02922e-26	TNFAIP3	PREDICTED: tumor necrosis factor alpha-induced protein 3 isoform X1 [Sus scrofa]	Human Diseases;Cellular Processes;Organismal Systems;Human Diseases;Environmental Information Processing;Environmental Information Processing;Organismal Systems	Infectious diseases;Cell growth and death;Immune system;Infectious diseases;Signal transduction;Signal transduction;Immune system	ko05169//Epstein-Barr virus infection;ko04217//Necroptosis;ko04621//NOD-like receptor signaling pathway;ko05162//Measles;ko04668//TNF signaling pathway;ko04064//NF-kappa B signaling pathway;ko04657//IL-17 signaling pathway	K11859;K11859;K11859;K11859;K11859;K11859;K11859	-	-	-
LOC100521017	1996	2340	2245	1925	1781	1592	161.27	160.27	155.03	118.41	115.78	113.51	158.857	115.9	-0.454845	1.96744e-27	3.0825e-25	PLAUR	PREDICTED: urokinase plasminogen activator surface receptor isoform X1 [Sus scrofa]	Human Diseases;Organismal Systems	Cancers;Immune system	ko05205//Proteoglycans in cancer;ko04610//Complement and coagulation cascades	K03985;K03985	-	-	-
LOC100514105	3112	3606	3735	5698	5166	4797	87.54	85.28	89.28	120.97	115.77	116.86	87.3667	117.867	0.432001	3.21607e-27	4.97418e-25	MMP15	PREDICTED: matrix metalloproteinase-15 [Felis catus]	Organismal Systems	Endocrine system	ko04928//Parathyroid hormone synthesis, secretion and action	K07995	GO:0016021//integral component of membrane	GO:0046914//transition metal ion binding;GO:0070011//peptidase activity, acting on L-amino acid peptides	GO:0019538//protein metabolic process;GO:0030154//cell differentiation
LOC100520019	2631	3253	3012	2604	2512	2173	264.09	276.87	258.47	199.04	202.91	192.54	266.477	198.163	-0.427319	5.19096e-27	7.92706e-25	RHOC	PREDICTED: rho-related GTP-binding protein RhoC isoform X1 [Camelus ferus]	-	-	-	-	-	-	-
LOC102158045	1760	2033	2030	3332	2989	3020	71.7	70.12	70.64	103.02	98.36	107.69	70.82	103.023	0.540742	9.44132e-27	1.42375e-24	DDX5	PREDICTED: probable ATP-dependent RNA helicase DDX5 isoform X2 [Colobus angolensis palliatus]	Human Diseases;Human Diseases;Genetic Information Processing	Cancers;Cancers;Transcription	ko05205//Proteoglycans in cancer;ko05202//Transcriptional misregulation in cancers;ko03040//Spliceosome	K12823;K12823;K12823	-	-	-
LOC100626978	637	896	805	1672	1523	1304	77.39	92.28	83.59	154.64	148.87	139.81	84.42	147.773	0.807729	5.13038e-26	7.6411e-24	ID3	DNA-binding protein inhibitor ID-3 [Sus scrofa]	Cellular Processes;Environmental Information Processing	Cellular community - eukaryotes;Signal transduction	ko04550//Signaling pathways regulating pluripotency of stem cells;ko04350//TGF-beta signaling pathway	K17694;K17694	-	-	-
LOC100620392	4823	5718	5577	8238	7685	7114	101.2	101.78	99.96	131.18	129.35	131.25	100.98	130.593	0.371012	9.5597e-26	1.40644e-23	DAG1	RecName: Full=Dystroglycan; AltName: Full=Dystrophin-associated glycoprotein 1; Contains: RecName: Full=Alpha-dystroglycan; Short=Alpha-DG; Contains: RecName: Full=Beta-dystroglycan; Short=Beta-DG; Flags: Precursor	Human Diseases;Human Diseases;Environmental Information Processing;Human Diseases;Human Diseases	Cardiovascular diseases;Cardiovascular diseases;Signaling molecules and interaction;Cardiovascular diseases;Cardiovascular diseases	ko05414//Dilated cardiomyopathy (DCM);ko05410//Hypertrophic cardiomyopathy (HCM);ko04512//ECM-receptor interaction;ko05412//Arrhythmogenic right ventricular cardiomyopathy (ARVC);ko05416//Viral myocarditis	K06265;K06265;K06265;K06265;K06265	-	-	-
LOC100518810	1050	1275	1215	938	867	790	38.44	39.57	38.02	26.14	25.54	25.52	38.6767	25.7333	-0.587825	1.45302e-25	2.11196e-23	TRIB3	PREDICTED: tribbles homolog 3 isoform X1 [Bubalus bubalis]	Human Diseases	Endocrine and metabolic diseases	ko04931//Insulin resistance	K19518	-	-	-
LOC100624458	1166	1251	1333	2279	2112	1922	10.13	9.21	9.89	15.06	14.75	14.72	9.74333	14.8433	0.607328	1.73397e-25	2.49031e-23	ANKH	PREDICTED: progressive ankylosis protein homolog [Sus scrofa]	-	-	-	-	-	-	-
LOC100154160	5206	6029	6149	5597	5295	4994	273.76	268.76	276.37	224.06	224.03	231.75	272.963	226.613	-0.268474	2.03857e-25	2.89333e-23	PSAT1	PREDICTED: phosphoserine aminotransferase [Sus scrofa]	Metabolism;Metabolism;Metabolism;Metabolism;Metabolism	Global and overview maps;Global and overview maps;Global and overview maps;Amino acid metabolism;Metabolism of cofactors and vitamins	ko01100//Metabolic pathways;ko01200//Carbon metabolism;ko01230//Biosynthesis of amino acids;ko00260//Glycine, serine and threonine metabolism;ko00750//Vitamin B6 metabolism	K00831;K00831;K00831;K00831;K00831	-	-	-
LOC100144523	530	661	682	1350	1159	1072	12.96	13.64	14.28	25.15	22.82	23.22	13.6267	23.73	0.800279	2.65707e-25	3.72731e-23	PMEPA1	PREDICTED: protein TMEPAI isoform X1 [Sus scrofa]	-	-	-	-	-	-	-
LOC100516830	1325	1708	1579	1262	1170	1073	62.34	67.55	62.08	44.99	42.43	42.89	63.99	43.4367	-0.558933	3.44582e-25	4.73108e-23	RASSF1	PREDICTED: ras association domain-containing protein 1 isoform X1 [Sus scrofa]	Human Diseases;Environmental Information Processing;Human Diseases;Environmental Information Processing;Human Diseases;Human Diseases;Environmental Information Processing	Cancers;Signal transduction;Cancers;Signal transduction;Cancers;Cancers;Signal transduction	ko05200//Pathways in cancer;ko04014//Ras signaling pathway;ko05206//MicroRNAs in cancer;ko04390//Hippo signaling pathway;ko05223//Non-small cell lung cancer;ko05219//Bladder cancer;ko04392//Hippo signaling pathway - multiple species	K09850;K09850;K09850;K09850;K09850;K09850;K09850	-	-	-
LOC733667	2175	2486	2508	2116	1926	1905	59.82	57.95	59.71	44.75	43.13	46.83	59.16	44.9033	-0.3978	3.45105e-25	4.73108e-23	AK4	PREDICTED: adenylate kinase 4, mitochondrial isoform X1 [Sus scrofa]	Metabolism;Metabolism;Metabolism	Global and overview maps;Nucleotide metabolism;Metabolism of cofactors and vitamins	ko01100//Metabolic pathways;ko00230//Purine metabolism;ko00730//Thiamine metabolism	K00939;K00939;K00939	-	-	-
LOC100737113	1351	1580	1491	2526	2563	2256	100.82	99.95	95.1	143.51	153.89	148.57	98.6233	148.657	0.591983	3.5453e-25	4.80567e-23	KRT17	PREDICTED: keratin, type I cytoskeletal 17 isoform X3 [Sus scrofa]	Organismal Systems;Human Diseases;Human Diseases	Endocrine system;Infectious diseases;Infectious diseases	ko04915//Estrogen signaling pathway;ko05130//Pathogenic Escherichia coli infection;ko05150//Staphylococcus aureus infection	K07604;K07604;K07604	-	-	-
LOC654406	3389	4225	4256	3618	3499	3125	286.15	302.46	307.21	232.56	237.79	232.94	298.607	234.43	-0.349089	4.91804e-25	6.59235e-23	AKR1C3	prostaglandin F synthase [Sus scrofa]	-	-	-	-	-	-	-
LOC110261143	1011	1147	1190	2181	1818	1788	37.84	36.17	37.91	62.14	54.78	59.12	37.3067	58.68	0.653435	8.12114e-25	1.06493e-22	SFPQ	PREDICTED: splicing factor, proline- and glutamine-rich [Odobenus rosmarus divergens]	-	-	-	-	-	-	-
LOC110260406	2783	3199	3149	4871	4646	4152	23.3	22.7	22.53	31.04	31.29	30.67	22.8433	31	0.440495	2.01878e-24	2.60764e-22	EPPK1	PREDICTED: LOW QUALITY PROTEIN: epiplakin [Bos taurus]	-	-	-	-	-	-	-
LOC100621090	822	1048	1005	693	650	649	50.25	54.31	52.51	32.25	31.97	35.01	52.3567	33.0767	-0.662559	2.03181e-24	2.60764e-22	GADD45B	PREDICTED: growth arrest and DNA damage-inducible protein GADD45 beta [Sus scrofa]	Human Diseases;Environmental Information Processing;Human Diseases;Human Diseases;Cellular Processes;Human Diseases;Human Diseases;Cellular Processes;Environmental Information Processing;Cellular Processes;Environmental Information Processing;Human Diseases;Human Diseases;Human Diseases;Cellular Processes;Human Diseases;Human Diseases;Human Diseases;Human Diseases;Human Diseases;Human Diseases;Hu…	Cancers;Signal transduction;Cancers;Cancers;Cell growth and death;Cancers;Cancers;Cell growth and death;Signal transduction;Cell growth and death;Signal transduction;Cancers;Cancers;Cancers;Cell growth and death;Cancers;Cancers;Cancers;Cancers;Cancers;Cancers;Cancers	ko05200//Pathways in cancer;ko04010//MAPK signaling pathway;ko05202//Transcriptional misregulation in cancers;ko05225//Hepatocellular carcinoma;ko04218//Cellular senescence;ko05226//Gastric cancer;ko05224//Breast cancer;ko04210//Apoptosis;ko04068//FoxO signaling pathway;ko04110//Cell cycle;ko04064//NF-kappa B signaling pathway;ko05222//Small cell lung cancer;ko05210//Colorectal cancer;ko05220//Ch…	K04402;K04402;K04402;K04402;K04402;K04402;K04402;K04402;K04402;K04402;K04402;K04402;K04402;K04402;K04402;K04402;K04402;K04402;K04402;K04402;K04402;K04402	-	-	-
LOC100515283	1195	1457	1445	1128	1064	933	61.97	64.05	64.05	44.53	44.39	42.7	63.3567	43.8733	-0.530152	3.72297e-24	4.6303e-22	GM2A	PREDICTED: ganglioside GM2 activator isoform X1 [Sus scrofa]	Cellular Processes	Transport and catabolism	ko04142//Lysosome	K12383	GO:0031988//membrane-bounded vesicle;GO:0043231//intracellular membrane-bounded organelle	GO:0030234//enzyme regulator activity	GO:0001573//ganglioside metabolic process;GO:0009311//oligosaccharide metabolic process;GO:0009893//positive regulation of metabolic process;GO:0044708//single-organism behavior;GO:0050905//neuromuscular process;GO:0051235//maintenance of location
MSTRG.18004	1255	1532	1511	1229	1075	994	65.49	67.77	67.39	48.82	45.14	45.78	66.8833	46.58	-0.521936	4.62918e-24	5.69862e-22	Alas1	PREDICTED: 5-aminolevulinate synthase, nonspecific, mitochondrial [Bison bison bison]	Metabolism;Metabolism;Metabolism	Global and overview maps;Amino acid metabolism;Metabolism of cofactors and vitamins	ko01100//Metabolic pathways;ko00260//Glycine, serine and threonine metabolism;ko00860//Porphyrin and chlorophyll metabolism	K00643;K00643;K00643	GO:0044429//mitochondrial part	GO:0016749//N-succinyltransferase activity;GO:0043168//anion binding	GO:0006779//porphyrin-containing compound biosynthetic process
LOC397147	490	616	503	312	300	295	17.79	18.85	15.29	8.5	8.54	9.51	17.31	8.85	-0.967856	1.34675e-23	1.62472e-21	CLCN2	PREDICTED: chloride channel protein 2 isoform X2 [Sus scrofa]	Organismal Systems	Digestive system	ko04978//Mineral absorption	K05011	-	-	-
LOC102158679	465	619	586	1118	1095	973	15.39	17.5	16.74	28.45	29.27	28.65	16.5433	28.79	0.799318	1.54217e-23	1.84205e-21	CEACAM5	PREDICTED: LOW QUALITY PROTEIN: carcinoembryonic antigen-related cell adhesion molecule 5-like [Cavia porcellus]	-	-	-	-	-	-	-
LOC100624989	322	395	382	775	784	706	23.35	24.29	23.68	42.79	45.75	45.19	23.7733	44.5767	0.906945	4.53247e-23	5.36076e-21	SERTAD1	PREDICTED: SERTA domain-containing protein 1 [Sus scrofa]	-	-	-	-	-	-	-
LOC780425	3838	4421	4401	4022	3748	3621	312.43	291.77	299.36	245.97	227.45	248.27	301.187	240.563	-0.324241	5.95137e-23	6.97062e-21	Arf6	PREDICTED: ADP-ribosylation factor 6 [Chinchilla lanigera]	Cellular Processes;Environmental Information Processing;Environmental Information Processing;Organismal Systems	Transport and catabolism;Signal transduction;Signal transduction;Immune system	ko04144//Endocytosis;ko04014//Ras signaling pathway;ko04072//Phospholipase D signaling pathway;ko04666//Fc gamma R-mediated phagocytosis	K07941;K07941;K07941;K07941	-	-	-
LOC808510	5287	5975	6020	8932	8093	8210	446.08	427.36	434.13	573.73	549.4	611.3	435.857	578.143	0.407573	7.80927e-23	8.97248e-21	MT-ND4	NADH dehydrogenase subunit 4 (mitochondrion) [Sus scrofa]	Metabolism;Organismal Systems;Organismal Systems;Human Diseases;Metabolism	Global and overview maps;Environmental adaptation;Nervous system;Neurodegenerative diseases;Energy metabolism	ko01100//Metabolic pathways;ko04714//Thermogenesis;ko04723//Retrograde endocannabinoid signaling;ko05012//Parkinson disease;ko00190//Oxidative phosphorylation	K03881;K03881;K03881;K03881;K03881	-	-	-
LOC100623071	1382	1672	1613	2735	2519	2210	61.92	63.5	61.77	93.29	90.81	87.38	62.3967	90.4933	0.536343	2.28975e-22	2.606e-20	FOXJ1	PREDICTED: forkhead box protein J1 [Sus scrofa]	-	-	-	-	-	-	-
LOC100519746	592	712	697	1322	1163	1107	16.13	16.63	16.1	27.15	24.8	26.14	16.2867	26.03	0.676484	2.88343e-22	3.251e-20	DAB2	PREDICTED: disabled homolog 2 isoform X1 [Sus scrofa]	Cellular Processes	Transport and catabolism	ko04144//Endocytosis	K12475	-	-	-
LOC396944	1270	1447	1375	2328	2238	2039	80.08	80.12	73.71	112.12	117.91	114.94	77.97	114.99	0.560517	5.95929e-22	6.65674e-20	GLUL	PREDICTED: glutamine synthetase isoform X1 [Acinonyx jubatus]	Metabolism;Cellular Processes;Organismal Systems;Organismal Systems;Metabolism;Metabolism;Metabolism;Metabolism;Metabolism	Global and overview maps;Cell growth and death;Nervous system;Nervous system;Global and overview maps;Amino acid metabolism;Carbohydrate metabolism;Amino acid metabolism;Energy metabolism	ko01100//Metabolic pathways;ko04217//Necroptosis;ko04724//Glutamatergic synapse;ko04727//GABAergic synapse;ko01230//Biosynthesis of amino acids;ko00250//Alanine, aspartate and glutamate metabolism;ko00630//Glyoxylate and dicarboxylate metabolism;ko00220//Arginine biosynthesis;ko00910//Nitrogen metabolism	K01915;K01915;K01915;K01915;K01915;K01915;K01915;K01915;K01915	-	-	-
LOC397284	922	1173	1151	1875	1833	1694	36.11	38.94	38.52	55.9	57.75	58.54	37.8567	57.3967	0.60042	8.76955e-22	9.61781e-20	CLCA1	calcium-activated chloride channel regulator 1 precursor [Sus scrofa]	Organismal Systems;Organismal Systems	Digestive system;Endocrine system	ko04972//Pancreatic secretion;ko04924//Renin secretion	K05027;K05027	-	-	-
LOC100145887	2425	2660	2786	2452	2242	2047	66	60.68	63.96	50.4	47.99	49.08	63.5467	49.1567	-0.370429	9.65957e-22	1.04985e-19	ARHGEF2	PREDICTED: rho guanine nucleotide exchange factor 2 isoform X1 [Sus scrofa]	Cellular Processes;Human Diseases;Human Diseases	Cellular community - eukaryotes;Cardiovascular diseases;Infectious diseases	ko04530//Tight junction;ko05418//Fluid shear stress and atherosclerosis;ko05130//Pathogenic Escherichia coli infection	K12791;K12791;K12791	-	-	-
LOC110260904	299	285	357	121	142	146	7.58	6.12	7.73	2.33	2.89	3.26	7.14333	2.82667	-1.3375	1.08658e-21	1.1704e-19	OSGIN1	PREDICTED: oxidative stress-induced growth inhibitor 1 [Ceratotherium simum simum]	-	-	-	-	-	-	-
LOC397130	3058	3537	3656	3300	2804	2796	306.66	300.63	313.65	251.75	226.25	247.34	306.98	241.78	-0.34445	1.1515e-21	1.22935e-19	HMGB2	high mobility group protein B2 [Sus scrofa]	-	-	-	-	-	-	-
LOC100625212	1846	1987	2082	3320	3104	2776	40.97	37.39	39.5	56.1	55.43	54.38	39.2867	55.3033	0.493327	1.59333e-21	1.68613e-19	Rab11fip1	PREDICTED: rab11 family-interacting protein 1 isoform X3 [Canis lupus familiaris]	Cellular Processes	Transport and catabolism	ko04144//Endocytosis	K12484	-	-	-
LOC100520565	823	930	1003	1620	1645	1464	30.19	28.51	31.61	45.67	48.76	47.38	30.1033	47.27	0.651002	1.66262e-21	1.74416e-19	PLEKHG6	PREDICTED: pleckstrin homology domain-containing family G member 6 [Sus scrofa]	-	-	-	-	-	-	-
LOC110261495	1774	2124	2107	1797	1691	1412	118.67	120.45	120.47	91.52	91.02	83.36	119.863	88.6333	-0.435469	2.29166e-21	2.38332e-19	LY6G6C	PREDICTED: lymphocyte antigen 6 complex locus protein G6c [Rousettus aegyptiacus]	-	-	-	-	-	-	-
LOC396625	1746	1900	2110	1584	1573	1468	72.04	66.45	74.41	49.75	52.22	53.45	70.9667	51.8067	-0.454004	3.09767e-21	3.19405e-19	GSR	PREDICTED: glutathione reductase [Sus scrofa]	Organismal Systems;Metabolism	Endocrine system;Metabolism of other amino acids	ko04918//Thyroid hormone synthesis;ko00480//Glutathione metabolism	K00383;K00383	-	-	-
LOC397546	1450	1717	1548	1256	1287	1031	84.42	84.74	77.03	55.67	60.29	52.97	82.0633	56.31	-0.543347	3.56987e-21	3.64974e-19	PGD	PREDICTED: 6-phosphogluconate dehydrogenase, decarboxylating [Sus scrofa]	Metabolism;Metabolism;Metabolism;Metabolism	Global and overview maps;Global and overview maps;Metabolism of other amino acids;Carbohydrate metabolism	ko01100//Metabolic pathways;ko01200//Carbon metabolism;ko00480//Glutathione metabolism;ko00030//Pentose phosphate pathway	K00033;K00033;K00033;K00033	-	-	-
LOC100525485	2282	2614	2694	2323	2239	1995	153.47	149.14	155.01	118.96	121.23	118.46	152.54	119.55	-0.351573	4.82683e-21	4.89335e-19	Impdh2	PREDICTED: inosine-5'-monophosphate dehydrogenase 2 isoform X1 [Sus scrofa]	Metabolism;Metabolism;Metabolism	Global and overview maps;Nucleotide metabolism;Xenobiotics biodegradation and metabolism	ko01100//Metabolic pathways;ko00230//Purine metabolism;ko00983//Drug metabolism - other enzymes	K00088;K00088;K00088	-	-	-
LOC406188	603	657	623	416	407	393	74.19	68.52	65.51	38.96	40.29	42.67	69.4067	40.64	-0.772174	5.22062e-21	5.24847e-19	NFKBIA	NF-kappa-B inhibitor alpha [Sus scrofa]	Human Diseases;Human Diseases;Human Diseases;Human Diseases;Human Diseases;Environmental Information Processing;Human Diseases;Human Diseases;Human Diseases;Organismal Systems;Organismal Systems;Human Diseases;Human Diseases;Human Diseases;Cellular Processes;Organismal Systems;Organismal Systems;Organismal Systems;Organismal Systems;Organismal Systems;Environmental Information Processing;Human Di…	Cancers;Infectious diseases;Infectious diseases;Infectious diseases;Infectious diseases;Signal transduction;Infectious diseases;Infectious diseases;Cancers;Immune system;Immune system;Infectious diseases;Infectious diseases;Infectious diseases;Cell growth and death;Development;Endocrine system;Immune system;Nervous system;Immune system;Signal transduction;Infectious diseases;Cancers;Signal transd…	ko05200//Pathways in cancer;ko05166//HTLV-I infection;ko05163//Human cytomegalovirus infection;ko05168//Herpes simplex infection;ko05169//Epstein-Barr virus infection;ko04024//cAMP signaling pathway;ko05167//Kaposi sarcoma-associated herpesvirus infection;ko05164//Influenza A;ko05203//Viral carcinogenesis;ko04062//Chemokine signaling pathway;ko04621//NOD-like receptor signaling pathway;ko05161//H…	K04734;K04734;K04734;K04734;K04734;K04734;K04734;K04734;K04734;K04734;K04734;K04734;K04734;K04734;K04734;K04734;K04734;K04734;K04734;K04734;K04734;K04734;K04734;K04734;K04734;K04734;K04734;K04734;K04734;K04734;K04734;K04734;K04734;K04734;K04734;K04734;K04734;K04734;K04734;K04734	-	-	-
LOC100312961	3067	3595	3569	3139	3101	2853	211.88	210.53	210.73	165.09	172.36	173.93	211.047	170.46	-0.308129	6.49986e-21	6.48053e-19	ASNS	asparagine synthetase [Sus scrofa]	Metabolism;Metabolism	Global and overview maps;Amino acid metabolism	ko01100//Metabolic pathways;ko00250//Alanine, aspartate and glutamate metabolism	K01953;K01953	-	-	-
LOC397062	1122	1217	1257	995	767	838	54.74	50.34	52.42	36.96	30.11	36.08	52.5	34.3833	-0.610608	8.04044e-21	7.95081e-19	TFRC	transferrin receptor protein 1 [Sus scrofa]	Cellular Processes;Cellular Processes;Environmental Information Processing;Organismal Systems;Cellular Processes	Transport and catabolism;Transport and catabolism;Signal transduction;Immune system;Cell growth and death	ko04144//Endocytosis;ko04145//Phagosome;ko04066//HIF-1 signaling pathway;ko04640//Hematopoietic cell lineage;ko04216//Ferroptosis	K06503;K06503;K06503;K06503;K06503	-	-	-
LOC397195	736	929	867	675	531	533	57.32	61.33	57.71	40.02	33.27	36.63	58.7867	36.64	-0.682069	8.23803e-21	8.07997e-19	ADM	ADM precursor [Sus scrofa]	-	-	-	-	-	-	-
LOC100512455	416	501	446	285	272	248	9.75	9.96	8.94	5.09	5.13	5.13	9.55	5.11667	-0.900296	1.25256e-20	1.21862e-18	ABTB2	PREDICTED: ankyrin repeat and BTB/POZ domain-containing protein 2 [Sus scrofa]	-	-	-	-	-	-	-
LOC494014	2314	2629	2692	2391	2070	2085	186.86	160.69	168.27	140.59	131.91	136.44	171.94	136.313	-0.334979	2.2212e-20	2.14372e-18	PRNP	major prion protein precursor [Sus scrofa]	Human Diseases;Cellular Processes	Neurodegenerative diseases;Cell growth and death	ko05020//Prion diseases;ko04216//Ferroptosis	K05634;K05634	-	-	-
LOC397608	3211	4075	3807	3402	3189	3131	309.08	331.13	314.33	251.93	246.49	261.88	318.18	253.433	-0.328237	3.74791e-20	3.58847e-18	--	PREDICTED: tropomyosin alpha-4 chain isoform X1 [Sus scrofa]	-	-	-	-	-	-	-
MSTRG.2475	1942	2034	2012	1744	1598	1542	92.21	81.01	77.55	60.64	60.98	61.22	83.59	60.9467	-0.455783	5.92026e-20	5.57985e-18	--	hCG2018832, partial [Homo sapiens]	-	-	-	-	-	-	-
LOC100627339	948	1050	1033	786	753	732	44.64	41.92	41.58	28.18	28.53	30.42	42.7133	29.0433	-0.556479	8.53138e-20	7.97849e-18	TTC9	PREDICTED: tetratricopeptide repeat protein 9A [Rhinolophus sinicus]	-	-	-	-	-	-	-
LOC110257485	156	199	184	499	409	391	2.15	2.33	2.17	5.24	4.54	4.76	2.21667	4.84667	1.1286	9.99024e-20	9.27095e-18	DIDO1	PREDICTED: death-inducer obliterator 1 isoform X1 [Equus caballus]	-	-	-	-	-	-	-
LOC100156204	3907	4976	4729	4342	4007	3891	298.65	322.45	308.97	252.68	246.44	262.48	310.023	253.867	-0.288306	1.02026e-19	9.39572e-18	PDIA3	protein disulfide-isomerase A3 precursor [Sus scrofa]	Human Diseases;Genetic Information Processing;Organismal Systems	Infectious diseases;Folding, sorting and degradation;Immune system	ko05163//Human cytomegalovirus infection;ko04141//Protein processing in endoplasmic reticulum;ko04612//Antigen processing and presentation	K08056;K08056;K08056	-	-	-
LOC100144450	351	329	319	787	699	644	9.41	7.99	8.31	17.38	16.18	17.32	8.57	16.96	0.984769	1.48511e-19	1.3573e-17	PPP1R10	serine/threonine-protein phosphatase 1 regulatory subunit 10 [Sus scrofa]	-	-	-	-	-	-	-
LOC100499564	3902	4729	4555	4182	4143	3594	342.91	352.3	342.14	279.79	292.94	278.73	345.783	283.82	-0.284892	1.77225e-19	1.60755e-17	PDIA6	protein disulfide-isomerase A6 precursor [Sus scrofa]	Genetic Information Processing	Folding, sorting and degradation	ko04141//Protein processing in endoplasmic reticulum	K09584	-	-	-
LOC100516554	1379	1402	1517	2437	2318	2163	44.39	39.1	41.33	59.42	59.3	61.09	41.6067	59.9367	0.526624	2.94185e-19	2.64854e-17	Ntn4	netrin-4 isoform X1 [Microcebus murinus]	Organismal Systems	Development	ko04360//Axon guidance	K06845	-	-	-
LOC100522679	1592	1853	1884	1584	1501	1408	79.97	78.92	80.9	60.58	60.67	62.42	79.93	61.2233	-0.384655	3.19084e-19	2.85143e-17	PPP1R15A	PREDICTED: protein phosphatase 1 regulatory subunit 15A [Sus scrofa]	Genetic Information Processing	Folding, sorting and degradation	ko04141//Protein processing in endoplasmic reticulum	K14019	-	-	-
LOC100738612	838	1049	942	755	655	666	46.91	49.79	45.1	32.19	29.51	32.93	47.2667	31.5433	-0.583488	4.53061e-19	4.01892e-17	ATF3	PREDICTED: cyclic AMP-dependent transcription factor ATF-3 isoform X1 [Bubalus bubalis]	Human Diseases	Infectious diseases	ko05166//HTLV-I infection	K09032	-	-	-
LOC396880	305	354	395	199	200	189	23.85	23.46	26.4	11.85	12.58	13.04	24.57	12.49	-0.976124	2.06515e-18	1.79237e-16	CXCL8	interleukin-8 precursor [Sus scrofa]	Human Diseases;Environmental Information Processing;Human Diseases;Human Diseases;Human Diseases;Human Diseases;Organismal Systems;Organismal Systems;Cellular Processes;Human Diseases;Human Diseases;Environmental Information Processing;Human Diseases;Organismal Systems;Human Diseases;Human Diseases;Environmental Information Processing;Human Diseases;Human Diseases;Human Diseases;Organismal System…	Cancers;Signaling molecules and interaction;Infectious diseases;Infectious diseases;Infectious diseases;Cancers;Immune system;Immune system;Cell growth and death;Endocrine and metabolic diseases;Infectious diseases;Signal transduction;Infectious diseases;Immune system;Infectious diseases;Infectious diseases;Signal transduction;Endocrine and metabolic diseases;Infectious diseases;Immune diseases;I…	ko05200//Pathways in cancer;ko04060//Cytokine-cytokine receptor interaction;ko05163//Human cytomegalovirus infection;ko05167//Kaposi sarcoma-associated herpesvirus infection;ko05164//Influenza A;ko05202//Transcriptional misregulation in cancers;ko04062//Chemokine signaling pathway;ko04621//NOD-like receptor signaling pathway;ko04218//Cellular senescence;ko04932//Non-alcoholic fatty liver disease …	K10030;K10030;K10030;K10030;K10030;K10030;K10030;K10030;K10030;K10030;K10030;K10030;K10030;K10030;K10030;K10030;K10030;K10030;K10030;K10030;K10030;K10030;K10030;K10030;K10030;K10030;K10030;K10030	-	-	-
LOC100624868	1409	1832	1767	1453	1319	1313	111.75	123.17	119.78	87.73	84.17	91.89	118.233	87.93	-0.427209	2.18306e-18	1.88118e-16	BNIP3	PREDICTED: BCL2/adenovirus E1B 19 kDa protein-interacting protein 3 [Sus scrofa]	Cellular Processes;Environmental Information Processing;Human Diseases;Cellular Processes	Transport and catabolism;Signal transduction;Infectious diseases;Transport and catabolism	ko04140//Autophagy - animal;ko04068//FoxO signaling pathway;ko05134//Legionellosis;ko04137//Mitophagy - animal	K15464;K15464;K15464;K15464	-	-	-
LOC100621544	1967	2383	2172	1935	1900	1707	81.11	83.32	76.99	60.53	62.17	61.5	80.4733	61.4	-0.390272	2.46794e-18	2.11158e-16	RNF19B	PREDICTED: E3 ubiquitin-protein ligase RNF19B isoform X1 [Sus scrofa]	-	-	-	-	-	-	-
LOC100153829	1782	2091	1995	1795	1660	1358	67.09	67.03	64.55	51.55	50.48	45.21	66.2233	49.08	-0.432204	2.64641e-18	2.24833e-16	NFKB2	PREDICTED: nuclear factor NF-kappa-B p100 subunit isoform X1 [Sus scrofa]	Human Diseases;Environmental Information Processing;Human Diseases;Human Diseases;Human Diseases;Human Diseases;Organismal Systems;Environmental Information Processing;Organismal Systems;Human Diseases	Cancers;Signal transduction;Infectious diseases;Infectious diseases;Cancers;Cancers;Development;Signal transduction;Immune system;Infectious diseases	ko05200//Pathways in cancer;ko04010//MAPK signaling pathway;ko05166//HTLV-I infection;ko05169//Epstein-Barr virus infection;ko05203//Viral carcinogenesis;ko05224//Breast cancer;ko04380//Osteoclast differentiation;ko04064//NF-kappa B signaling pathway;ko04625//C-type lectin receptor signaling pathway;ko05134//Legionellosis	K04469;K04469;K04469;K04469;K04469;K04469;K04469;K04469;K04469;K04469	-	-	-
LOC100126235	58	52	47	194	236	176	7.56	5.75	5.24	19.25	24.75	20.24	6.18333	21.4133	1.79205	3.13081e-18	2.64127e-16	AQP3	aquaporin-3 [Sus scrofa]	Organismal Systems	Excretory system	ko04962//Vasopressin-regulated water reabsorption	K09876	-	-	-
LOC100157578	247	300	309	675	622	502	11.24	11.5	12.06	23.66	23.19	20.39	11.6	22.4133	0.950232	3.39059e-18	2.84056e-16	NAB2	PREDICTED: NGFI-A-binding protein 2 [Sus scrofa]	-	-	-	-	-	-	-
LOC100624320	2177	2567	2556	3837	3502	3279	100.24	100.2	100.59	134.5	129.74	133.24	100.343	132.493	0.400975	5.10603e-18	4.24822e-16	Pttg1ip	PREDICTED: pituitary tumor-transforming gene 1 protein-interacting protein [Sus scrofa]	-	-	-	-	-	-	-
LOC100523845	239	279	287	605	591	485	3.49	3.46	3.67	6.76	7.01	6.28	3.54	6.68333	0.916818	7.18792e-18	5.93939e-16	DEF8	PREDICTED: differentially expressed in FDCP 8 homolog isoform X1 [Sus scrofa]	-	-	-	-	-	-	-
LOC100624785	2062	2282	2209	2074	1845	1635	146.55	137.49	134.15	112.21	105.5	102.53	139.397	106.747	-0.385005	8.00208e-18	6.56715e-16	TUBB2A	tubulin beta-2A chain isoform 1 [Homo sapiens]	Cellular Processes;Human Diseases;Cellular Processes	Transport and catabolism;Infectious diseases;Cellular community - eukaryotes	ko04145//Phagosome;ko05130//Pathogenic Escherichia coli infection;ko04540//Gap junction	K07375;K07375;K07375	-	-	-
LOC100627693	1208	1476	1320	1140	1080	987	39.9	40.78	36.39	28.53	28.34	28.07	39.0233	28.3133	-0.462855	9.0203e-18	7.35276e-16	RAB7B	PREDICTED: ras-related protein Rab-7b [Sus scrofa]	Cellular Processes;Cellular Processes;Human Diseases;Human Diseases;Cellular Processes	Transport and catabolism;Transport and catabolism;Infectious diseases;Infectious diseases;Transport and catabolism	ko04145//Phagosome;ko04140//Autophagy - animal;ko05146//Amoebiasis;ko05132//Salmonella infection;ko04137//Mitophagy - animal	K07898;K07898;K07898;K07898;K07898	-	-	-
LOC100628102	456	550	575	986	1007	859	18.47	18.89	19.91	30.41	32.82	30.71	19.09	31.3133	0.71396	1.31911e-17	1.06804e-15	VILL	PREDICTED: villin-like protein [Sus scrofa]	-	-	-	-	-	-	-
LOC654328	1284	1407	1436	2296	2071	2084	25.91	24.23	25.6	35.97	32.33	37.27	25.2467	35.19	0.479073	2.22944e-17	1.79307e-15	MET	met proto-oncogene precursor [Sus scrofa]	Human Diseases;Environmental Information Processing;Environmental Information Processing;Environmental Information Processing;Environmental Information Processing;Human Diseases;Cellular Processes;Human Diseases;Organismal Systems;Human Diseases;Human Diseases;Human Diseases;Human Diseases;Human Diseases;Cellular Processes;Human Diseases;Human Diseases;Human Diseases;Human Diseases;Human Diseases	Cancers;Signal transduction;Signal transduction;Signal transduction;Signal transduction;Cancers;Cellular community - eukaryotes;Cancers;Development;Cancers;Cancers;Cancers;Drug resistance;Infectious diseases;Cellular community - eukaryotes;Cancers;Infectious diseases;Cancers;Cancers;Infectious diseases	ko05200//Pathways in cancer;ko04151//PI3K-Akt signaling pathway;ko04010//MAPK signaling pathway;ko04014//Ras signaling pathway;ko04015//Rap1 signaling pathway;ko05205//Proteoglycans in cancer;ko04510//Focal adhesion;ko05202//Transcriptional misregulation in cancers;ko04360//Axon guidance;ko05206//MicroRNAs in cancer;ko05225//Hepatocellular carcinoma;ko05226//Gastric cancer;ko01521//EGFR tyrosine …	K05099;K05099;K05099;K05099;K05099;K05099;K05099;K05099;K05099;K05099;K05099;K05099;K05099;K05099;K05099;K05099;K05099;K05099;K05099;K05099	-	-	-
LOC100525150	519	590	539	408	363	331	11.52	11.27	10.2	6.85	6.52	6.53	10.9967	6.63333	-0.72926	2.77356e-17	2.21591e-15	Cd44	PREDICTED: CD44 antigen isoform X4 [Sus scrofa]	Human Diseases;Human Diseases;Human Diseases;Organismal Systems;Environmental Information Processing;Human Diseases	Infectious diseases;Cancers;Cancers;Immune system;Signaling molecules and interaction;Infectious diseases	ko05169//Epstein-Barr virus infection;ko05205//Proteoglycans in cancer;ko05206//MicroRNAs in cancer;ko04640//Hematopoietic cell lineage;ko04512//ECM-receptor interaction;ko05131//Shigellosis	K06256;K06256;K06256;K06256;K06256;K06256	-	-	-
LOC397260	1721	1969	2019	3016	2785	2662	56.01	52.48	53.55	71.37	69.24	71.06	54.0133	70.5567	0.385467	3.01221e-17	2.39074e-15	Smad3	mothers against decapentaplegic homolog 3 isoform 1 [Homo sapiens]	Human Diseases;Human Diseases;Cellular Processes;Human Diseases;Human Diseases;Cellular Processes;Human Diseases;Environmental Information Processing;Human Diseases;Cellular Processes;Environmental Information Processing;Environmental Information Processing;Organismal Systems;Environmental Information Processing;Cellular Processes;Organismal Systems;Human Diseases;Human Diseases;Human Diseases;En…	Cancers;Infectious diseases;Transport and catabolism;Cancers;Cancers;Cell growth and death;Infectious diseases;Signal transduction;Cancers;Cellular community - eukaryotes;Signal transduction;Signal transduction;Endocrine system;Signal transduction;Cell growth and death;Immune system;Infectious diseases;Endocrine and metabolic diseases;Cancers;Signal transduction;Cancers;Immune diseases;Cancers;Ce…	ko05200//Pathways in cancer;ko05166//HTLV-I infection;ko04144//Endocytosis;ko05205//Proteoglycans in cancer;ko05225//Hepatocellular carcinoma;ko04218//Cellular senescence;ko05161//Hepatitis B;ko04390//Hippo signaling pathway;ko05226//Gastric cancer;ko04550//Signaling pathways regulating pluripotency of stem cells;ko04310//Wnt signaling pathway;ko04371//Apelin signaling pathway;ko04926//Relaxin si…	K04500;K04500;K04500;K04500;K04500;K04500;K04500;K04500;K04500;K04500;K04500;K04500;K04500;K04500;K04500;K04500;K04500;K04500;K04500;K04500;K04500;K04500;K04500;K04500	-	-	-
LOC100526169	1995	2336	2208	2113	1810	1694	47.71	47.35	45.13	38.47	34.82	35.75	46.73	36.3467	-0.362526	3.17042e-17	2.49987e-15	PKP2	PREDICTED: plakophilin-2 isoform X1 [Balaenoptera acutorostrata scammoni]	Human Diseases	Cardiovascular diseases	ko05412//Arrhythmogenic right ventricular cardiomyopathy (ARVC)	K12642	-	-	-
LOC100337659	461	528	506	328	322	324	12.59	12.22	11.81	6.82	7.08	7.81	12.2067	7.23667	-0.754272	3.50245e-17	2.74374e-15	EPHB3	PREDICTED: ephrin type-B receptor 3 isoform X1 [Sus scrofa]	Organismal Systems	Development	ko04360//Axon guidance	K05112	-	-	-
LOC768102	238	255	227	538	525	477	26.66	24.21	21.73	45.88	47.31	47.15	24.2	46.78	0.950885	3.84133e-17	2.9898e-15	SRSF6	serine/arginine-rich splicing factor 6 [Sus scrofa]	Human Diseases;Genetic Information Processing	Infectious diseases;Transcription	ko05168//Herpes simplex infection;ko03040//Spliceosome	K12893;K12893	-	-	-
LOC100512395	1004	1222	1159	1941	1731	1662	31.15	32.13	30.66	45.77	43.15	45.46	31.3133	44.7933	0.516507	5.59256e-17	4.32491e-15	Midn	PREDICTED: midnolin [Orcinus orca]	-	-	-	-	-	-	-
LOC100505460	1288	1447	1547	1284	1195	1054	179.99	171.42	184.77	136.6	134.36	129.98	178.727	133.647	-0.419331	6.12151e-17	4.67404e-15	MANF	mesencephalic astrocyte-derived neurotrophic factor precursor [Sus scrofa]	-	-	-	-	-	-	-
LOC397561	3791	4412	4043	6387	6136	5339	54.98	54.24	50.11	70.52	71.6	68.33	53.11	70.15	0.40146	6.30476e-17	4.78369e-15	FASN	fatty acid synthase [Sus scrofa]	Metabolism;Organismal Systems;Environmental Information Processing;Metabolism;Metabolism	Global and overview maps;Endocrine system;Signal transduction;Global and overview maps;Lipid metabolism	ko01100//Metabolic pathways;ko04910//Insulin signaling pathway;ko04152//AMPK signaling pathway;ko01212//Fatty acid metabolism;ko00061//Fatty acid biosynthesis	K00665;K00665;K00665;K00665;K00665	-	-	-
MSTRG.7893	256	308	306	637	567	527	11.91	12.14	12.16	22.55	21.22	21.63	12.07	21.8	0.852902	7.41242e-17	5.58896e-15	NR4A1	PREDICTED: nuclear receptor subfamily 4 group A member 1 [Vicugna pacos]	Environmental Information Processing;Environmental Information Processing;Human Diseases;Organismal Systems;Organismal Systems	Signal transduction;Signal transduction;Endocrine and metabolic diseases;Endocrine system;Endocrine system	ko04151//PI3K-Akt signaling pathway;ko04010//MAPK signaling pathway;ko04934//Cushing syndrome;ko04925//Aldosterone synthesis and secretion;ko04927//Cortisol synthesis and secretion	K04465;K04465;K04465;K04465;K04465	GO:0043231//intracellular membrane-bounded organelle;GO:0043234//protein complex	GO:0000981//RNA polymerase II transcription factor activity, sequence-specific DNA binding;GO:0003677//DNA binding;GO:0038023//signaling receptor activity;GO:0046914//transition metal ion binding;GO:0046983//protein dimerization activity	GO:0001936//regulation of endothelial cell proliferation;GO:0006357//regulation of transcription from RNA polymerase II promoter;GO:0007519//skeletal muscle tissue development;GO:0009755//hormone-mediated signaling pathway;GO:0043066//negative regulation of apoptotic process;GO:0043534//blood vessel endothelial cell migration;GO:0071363//cellular response to growth factor stimulus
LOC100152838	1168	1329	1247	2073	1955	1822	25.41	24.51	23.19	34.34	34.23	34.98	24.37	34.5167	0.502187	1.12002e-16	8.39252e-15	Slc22a23	PREDICTED: solute carrier family 22 member 23, partial [Sus scrofa]	-	-	-	-	-	-	-
LOC100515289	529	607	628	412	441	331	52.12	50.7	52.89	30.9	34.96	28.78	51.9033	31.5467	-0.71834	1.14404e-16	8.51953e-15	BLVRA	PREDICTED: biliverdin reductase A [Sus scrofa]	Metabolism;Metabolism	Global and overview maps;Metabolism of cofactors and vitamins	ko01100//Metabolic pathways;ko00860//Porphyrin and chlorophyll metabolism	K00214;K00214	GO:0031988//membrane-bounded vesicle;GO:0044424//intracellular part	GO:0003824//catalytic activity;GO:0046914//transition metal ion binding	GO:0006787//porphyrin-containing compound catabolic process;GO:0044710//single-organism metabolic process
LOC100037299	1790	2094	2188	1759	1677	1711	72.85	72.37	76.33	54.71	54.85	61.51	73.85	57.0233	-0.373046	1.26706e-16	9.37776e-15	P4HA1	PREDICTED: prolyl 4-hydroxylase subunit alpha-1 isoform X1 [Sus scrofa]	Metabolism;Metabolism	Global and overview maps;Amino acid metabolism	ko01100//Metabolic pathways;ko00330//Arginine and proline metabolism	K00472;K00472	-	-	-
LOC396827	3194	3649	3391	5321	5037	4488	869.68	842.27	789.17	1102.99	1103.49	1078.41	833.707	1094.96	0.393271	2.69434e-16	1.96997e-14	--	PREDICTED: metallothionein-2A [Sus scrofa]	-	-	-	-	-	-	-
LOC100511977	2169	2544	2535	3739	3669	3174	69.43	69.04	69.36	91.12	94.5	89.66	69.2767	91.76	0.405496	2.74566e-16	1.9954e-14	Pgm5	PREDICTED: phosphoglucomutase-like protein 5 [Ovis aries]	-	-	-	-	-	-	-
LOC100525383	808	929	926	721	717	616	90.16	87.87	88.31	61.25	64.37	60.66	88.78	62.0933	-0.515796	3.27852e-16	2.36839e-14	Ccdc85b	PREDICTED: coiled-coil domain-containing protein 85B [Sus scrofa]	-	-	-	-	-	-	-
LOC654413	507	572	527	1003	916	924	29.55	28.26	26.25	44.5	42.95	47.52	28.02	44.99	0.683147	3.98409e-16	2.86095e-14	PALMD	palmdelphin [Sus scrofa]	-	-	-	-	-	-	-
LOC100626969	1228	1570	1523	1266	1004	1121	7.89	8.59	8.37	6.22	5.19	6.37	8.28333	5.92667	-0.482991	4.36014e-16	3.11247e-14	Lpp	PREDICTED: lipoma-preferred partner isoform X1 [Balaenoptera acutorostrata scammoni]	-	-	-	-	-	-	-
LOC397581	838	1013	882	723	641	675	247.12	248.23	220.21	163.77	152.43	174.12	238.52	163.44	-0.545349	4.38892e-16	3.11459e-14	TXN	PREDICTED: thioredoxin [Aotus nancymaae]	Organismal Systems;Human Diseases	Immune system;Cardiovascular diseases	ko04621//NOD-like receptor signaling pathway;ko05418//Fluid shear stress and atherosclerosis	K03671;K03671	-	-	-
LOC406870	227	237	228	499	479	494	7.12	6.35	6.15	11.93	12.14	13.78	6.54	12.6167	0.947968	4.64634e-16	3.24009e-14	CP	PREDICTED: ceruloplasmin isoform X1 [Sus scrofa]	Cellular Processes;Metabolism	Cell growth and death;Metabolism of cofactors and vitamins	ko04216//Ferroptosis;ko00860//Porphyrin and chlorophyll metabolism	K13624;K13624	-	-	-
LOC733625	2339	2829	2743	4000	3835	3470	208.55	213.83	209.03	271.51	275.11	273.03	210.47	273.217	0.376431	8.6189e-16	5.87449e-14	SFN	PREDICTED: 14-3-3 protein sigma isoform X1 [Sus scrofa]	Cellular Processes;Cellular Processes;Organismal Systems	Cell growth and death;Cell growth and death;Excretory system	ko04110//Cell cycle;ko04115//p53 signaling pathway;ko04960//Aldosterone-regulated sodium reabsorption	K06644;K06644;K06644	-	-	-
LOC106505015	2847	3173	3272	2974	2920	2574	57.21	54.06	56.14	45.51	47.21	45.61	55.8033	46.11	-0.275272	9.70795e-16	6.57959e-14	NFE2L1	PREDICTED: nuclear factor erythroid 2-related factor 1 isoform X1 [Orcinus orca]	-	-	-	-	-	-	-
LOC110259235	2068	2417	2418	3558	3441	3016	29.54	29.27	29.49	38.68	39.51	38.03	29.4333	38.74	0.396373	1.06865e-15	7.20235e-14	SPTBN2	PREDICTED: spectrin beta chain, non-erythrocytic 2 isoform X2 [Vicugna pacos]	-	-	-	-	-	-	-
LOC100516614	574	724	685	525	484	439	15.32	16.39	15.64	10.66	10.38	10.33	15.7833	10.4567	-0.593979	1.18336e-15	7.93117e-14	PLLP	PREDICTED: plasmolipin [Sus scrofa]	-	-	-	-	-	-	-
LOC100158214	1118	1325	1321	2143	1860	1792	25.31	24.86	25.25	36.56	33.63	35.38	25.14	35.19	0.485181	1.26355e-15	8.42178e-14	FLRT3	PREDICTED: leucine-rich repeat transmembrane protein FLRT3 [Sus scrofa]	-	-	-	-	-	-	-
LOC100515041	1572	1638	1741	1542	1294	1278	33.02	29.1	31.31	24.65	21.92	23.66	31.1433	23.41	-0.411798	1.27625e-15	8.45972e-14	Pdlim5	PREDICTED: PDZ and LIM domain protein 5 isoform X2 [Bos taurus]	-	-	-	-	GO:0005856//cytoskeleton;GO:0031674//I band	GO:0043169//cation binding	-
MSTRG.15229	2393	2760	2755	4114	3639	3649	65.1	65.88	65.36	86.76	81.79	89.25	65.4467	85.9333	0.392898	1.35684e-15	8.94474e-14	HNRNPU	PREDICTED: heterogeneous nuclear ribonucleoprotein U isoform X3 [Ovis aries musimon]	Genetic Information Processing	Transcription	ko03040//Spliceosome	K12888	GO:0005681//spliceosomal complex;GO:0031981//nuclear lumen;GO:0035770//ribonucleoprotein granule;GO:0043234//protein complex;GO:0044423//virion part	GO:0003723//RNA binding;GO:0032550//purine ribonucleoside binding;GO:0044212//transcription regulatory region DNA binding	GO:0000377//RNA splicing, via transesterification reactions with bulged adenosine as nucleophile;GO:0001503//ossification;GO:0007623//circadian rhythm;GO:0048255//mRNA stabilization
LOC100524810	1617	1807	1847	1602	1552	1423	185.91	176.15	181.46	140.09	143.54	144.33	181.173	142.653	-0.344857	1.43478e-15	9.35633e-14	IGSF23	PREDICTED: immunoglobulin superfamily member 23 isoform X1 [Sus scrofa]	-	-	-	-	-	-	-
LOC768117	777	1000	971	1579	1501	1329	50.38	66.34	68.12	86.1	87.16	89.95	61.6133	87.7367	0.509937	1.79869e-15	1.1604e-13	SRSF2	serine/arginine-rich splicing factor 2 [Sus scrofa]	Human Diseases;Genetic Information Processing	Infectious diseases;Transcription	ko05168//Herpes simplex infection;ko03040//Spliceosome	K12891;K12891	-	-	-
LOC100525045	1818	2066	2108	3094	2893	2729	38.07	36.68	37.73	49.33	48.74	50.43	37.4933	49.5	0.400794	1.8125e-15	1.16308e-13	ERBB3	PREDICTED: receptor tyrosine-protein kinase erbB-3 isoform X1 [Camelus bactrianus]	Environmental Information Processing;Environmental Information Processing;Human Diseases;Environmental Information Processing;Human Diseases;Environmental Information Processing;Human Diseases	Signal transduction;Signal transduction;Cancers;Signal transduction;Cancers;Signal transduction;Drug resistance	ko04151//PI3K-Akt signaling pathway;ko04010//MAPK signaling pathway;ko05205//Proteoglycans in cancer;ko04020//Calcium signaling pathway;ko05206//MicroRNAs in cancer;ko04012//ErbB signaling pathway;ko01521//EGFR tyrosine kinase inhibitor resistance	K05084;K05084;K05084;K05084;K05084;K05084;K05084	-	-	-
LOC100156818	999	1196	1135	941	927	835	28.12	28.54	27.3	20.16	20.99	20.74	27.9867	20.63	-0.439996	1.84092e-15	1.17507e-13	PI4K2A	PREDICTED: phosphatidylinositol 4-kinase type 2-alpha [Sus scrofa]	Metabolism;Environmental Information Processing;Metabolism	Global and overview maps;Signal transduction;Carbohydrate metabolism	ko01100//Metabolic pathways;ko04070//Phosphatidylinositol signaling system;ko00562//Inositol phosphate metabolism	K13711;K13711;K13711	-	-	-
LOC110260603	9130	10420	10437	14259	13584	12225	164.34	158.77	160.45	195.65	196.74	194.17	161.187	195.52	0.278584	1.88175e-15	1.19481e-13	PLXNB2	PREDICTED: plexin-B2 [Panthera pardus]	Organismal Systems	Development	ko04360//Axon guidance	K06821	-	-	-
LOC100621933	687	717	706	1341	1270	1040	19.93	17.64	17.51	29.62	29.65	26.63	18.36	28.6333	0.64113	2.12532e-15	1.32849e-13	EHD3	PREDICTED: EH domain-containing protein 3 [Dasypus novemcinctus]	Cellular Processes	Transport and catabolism	ko04144//Endocytosis	K12476	-	-	-
LOC100519410	257	283	288	556	588	504	11.5	10.74	11.02	18.94	21.17	19.9	11.0867	20.0033	0.851415	2.5509e-15	1.57816e-13	GALNT18	PREDICTED: polypeptide N-acetylgalactosaminyltransferase 18 [Felis catus]	Metabolism;Metabolism	Global and overview maps;Glycan biosynthesis and metabolism	ko01100//Metabolic pathways;ko00512//Mucin type O-glycan biosynthesis	K00710;K00710	-	-	-
LOC110261137	1510	1840	1698	2708	2542	2283	79.23	83.31	76.99	110.01	108.69	107.9	79.8433	108.867	0.447318	4.16715e-15	2.56492e-13	GJB3	PREDICTED: gap junction beta-3 protein [Tursiops truncatus]	-	-	-	-	-	-	-
LOC100153873	2633	3065	2992	4426	4259	3713	71.74	70.8	69.68	91.81	93.37	89.28	70.74	91.4867	0.371035	4.24411e-15	2.59903e-13	PTK7	PREDICTED: inactive tyrosine-protein kinase 7 [Sus scrofa]	-	-	-	-	-	-	-
LOC100521060	620	752	753	604	494	477	47.55	48.89	49.36	35.26	30.48	32.28	48.6	32.6733	-0.572843	4.93318e-15	3.00575e-13	IER3IP1	immediate early response 3-interacting protein 1 precursor [Homo sapiens]	-	-	-	-	-	-	-
LOC100516558	1405	1715	1630	1324	1429	1148	172.68	178.68	171.22	123.88	141.31	124.51	174.193	129.9	-0.423288	5.55661e-15	3.36859e-13	RRAS	PREDICTED: ras-related protein R-Ras [Sus scrofa]	Environmental Information Processing;Human Diseases;Environmental Information Processing;Cellular Processes;Environmental Information Processing;Environmental Information Processing;Human Diseases;Organismal Systems;Cellular Processes;Environmental Information Processing;Environmental Information Processing;Cellular Processes;Organismal Systems;Cellular Processes	Signal transduction;Infectious diseases;Signal transduction;Cell motility;Signal transduction;Signal transduction;Cancers;Development;Cell growth and death;Signal transduction;Signal transduction;Transport and catabolism;Immune system;Transport and catabolism	ko04010//MAPK signaling pathway;ko05166//HTLV-I infection;ko04014//Ras signaling pathway;ko04810//Regulation of actin cytoskeleton;ko04015//Rap1 signaling pathway;ko04024//cAMP signaling pathway;ko05205//Proteoglycans in cancer;ko04360//Axon guidance;ko04218//Cellular senescence;ko04072//Phospholipase D signaling pathway;ko04371//Apelin signaling pathway;ko04140//Autophagy - animal;ko04625//C-typ…	K07829;K07829;K07829;K07829;K07829;K07829;K07829;K07829;K07829;K07829;K07829;K07829;K07829;K07829	-	-	-
LOC100048933	1066	1215	1218	1078	887	884	43.49	41.77	42.29	33.09	28.97	31.79	42.5167	31.2833	-0.442634	6.95329e-15	4.19423e-13	ZFAND5	AN1-type zinc finger protein 5 [Sus scrofa]	-	-	-	-	-	-	-
LOC110260946	884	984	964	1581	1495	1376	20.43	19.33	19.38	28.57	27.95	28.29	19.7133	28.27	0.5201	1.61754e-14	9.66037e-13	Esrp2	PREDICTED: epithelial splicing regulatory protein 2 isoform X1 [Rousettus aegyptiacus]	-	-	-	-	-	-	-
LOC100627498	115	140	126	312	310	281	2.48	2.38	2.12	4.99	5.2	5.45	2.32667	5.21333	1.16394	1.74207e-14	1.03528e-12	SYTL2	PREDICTED: synaptotagmin-like protein 2 isoform X1 [Sus scrofa]	-	-	-	-	-	-	-
LOC396570	281	306	265	174	168	135	27.16	25.07	21.89	12.8	13.06	11.51	24.7067	12.4567	-0.987982	1.79668e-14	1.06251e-12	PLET1	placenta-expressed transcript 1 protein precursor [Sus scrofa]	-	-	-	-	-	-	-
LOC100152541	555	618	663	490	462	373	25.44	24.01	25.92	17.03	17.05	15.11	25.1233	16.3967	-0.615625	2.18744e-14	1.28103e-12	PQLC1	PREDICTED: PQ-loop repeat-containing protein 1 isoform X1 [Sus scrofa]	-	-	-	-	-	-	-
LOC100514347	1091	1322	1324	2048	1821	1814	26.9	27.63	27.9	38.45	36.13	39.47	27.4767	38.0167	0.468425	2.25639e-14	1.31503e-12	DDX17	PREDICTED: probable ATP-dependent RNA helicase DDX17 [Sus scrofa]	-	-	-	-	GO:0031981//nuclear lumen;GO:0043232//intracellular non-membrane-bounded organelle	GO:0003712//transcription cofactor activity;GO:0003723//RNA binding;GO:0004386//helicase activity;GO:0032550//purine ribonucleoside binding;GO:0035258//steroid hormone receptor binding;GO:0042623//ATPase activity, coupled	GO:0006357//regulation of transcription from RNA polymerase II promoter;GO:0033145//positive regulation of intracellular steroid hormone receptor signaling pathway;GO:0035914//skeletal muscle cell differentiation
LOC397346	106	119	135	316	271	283	4.49	4.28	4.89	10.2	9.25	10.59	4.55333	10.0133	1.13693	2.69719e-14	1.56437e-12	MMP13	PREDICTED: collagenase 3 [Sus scrofa]	Organismal Systems;Organismal Systems;Organismal Systems	Endocrine system;Endocrine system;Immune system	ko04926//Relaxin signaling pathway;ko04928//Parathyroid hormone synthesis, secretion and action;ko04657//IL-17 signaling pathway	K07994;K07994;K07994	-	-	-
LOC100524417	1186	1335	1316	1153	1034	1037	14.19	13.55	13.46	10.5	9.96	10.95	13.7333	10.47	-0.39142	2.79573e-14	1.61376e-12	THSD4	PREDICTED: thrombospondin type-1 domain-containing protein 4 isoform X2 [Ceratotherium simum simum]	-	-	-	-	-	-	-
LOC100622502	1046	1243	1170	1884	1770	1624	45.14	45.48	43.16	61.9	61.46	61.85	44.5933	61.7367	0.4693	3.67967e-14	2.11389e-12	CENPB	PREDICTED: major centromere autoantigen B [Hipposideros armiger]	-	-	-	-	-	-	-
LOC100628052	2480	2708	2763	2617	2402	2266	184.12	170.44	175.33	147.92	143.49	148.47	176.63	146.627	-0.268583	4.30464e-14	2.44958e-12	TCIM	PREDICTED: protein C8orf4 homolog [Ovis aries]	-	-	-	-	-	-	-
LOC100738688	381	516	522	913	800	789	16.32	18.74	19.11	29.78	27.57	29.83	18.0567	29.06	0.686503	4.46774e-14	2.53046e-12	HERPUD2	PREDICTED: homocysteine-responsive endoplasmic reticulum-resident ubiquitin-like domain member 2 protein [Camelus ferus]	-	-	-	-	-	-	-
LOC100513179	865	879	862	724	634	638	13.73	11.83	11.7	8.75	8.1	8.94	12.42	8.59667	-0.530816	4.67724e-14	2.63674e-12	DOPEY2	PREDICTED: protein dopey-2 isoform X1 [Sus scrofa]	-	-	-	-	-	-	-
LOC100154062	344	414	378	732	655	678	11.07	12.24	11.04	17.58	16.77	20.18	11.45	18.1767	0.66674	5.86924e-14	3.27808e-12	OLFML2A	PREDICTED: LOW QUALITY PROTEIN: olfactomedin-like protein 2A isoform X1 [Ovis aries]	-	-	-	-	-	-	-
LOC396886	241	318	265	554	564	496	47.09	52.68	44.26	82.41	88.67	85.53	48.01	85.5367	0.833208	6.29431e-14	3.49929e-12	SLPI	RecName: Full=Antileukoproteinase; Short=ALP; AltName: Full=Secretory leukocyte protease inhibitor; Flags: Precursor	-	-	-	-	-	-	-
LOC100620969	465	578	593	963	912	894	12.26	12.93	13.37	19.35	19.37	20.83	12.8533	19.85	0.626996	6.3347e-14	3.50559e-12	EREG	PREDICTED: proepiregulin [Sus scrofa]	Environmental Information Processing;Environmental Information Processing;Human Diseases;Environmental Information Processing	Signal transduction;Signal transduction;Cancers;Signal transduction	ko04151//PI3K-Akt signaling pathway;ko04010//MAPK signaling pathway;ko05210//Colorectal cancer;ko04012//ErbB signaling pathway	K09784;K09784;K09784;K09784	-	-	-
LOC100521921	126	153	137	346	303	300	2.98	3.06	2.76	6.22	5.76	6.25	2.93333	6.07667	1.05074	7.01507e-14	3.86437e-12	ATP12A	PREDICTED: potassium-transporting ATPase alpha chain 2 [Sus scrofa]	Metabolism	Energy metabolism	ko00190//Oxidative phosphorylation	K01544	-	-	-
LOC100156039	207	280	274	108	155	124	9.76	11.2	11.04	3.88	5.88	5.16	10.6667	4.97333	-1.10082	9.03853e-14	4.93398e-12	SLC38A3	PREDICTED: sodium-coupled neutral amino acid transporter 3 isoform X1 [Sus scrofa]	Organismal Systems;Organismal Systems;Organismal Systems	Nervous system;Nervous system;Excretory system	ko04724//Glutamatergic synapse;ko04727//GABAergic synapse;ko04964//Proximal tubule bicarbonate reclamation	K13576;K13576;K13576	-	-	-
LOC102163666	1641	2157	2155	1828	1745	1612	135.71	151.23	152.34	115.1	116.09	117.66	146.427	116.283	-0.332534	1.06038e-13	5.76237e-12	ZNHIT1	zinc finger HIT domain-containing protein 1 [Homo sapiens]	-	-	-	-	-	-	-
LOC100516661	531	679	629	1109	1030	914	25.24	27.45	25.6	40.2	39.55	38.45	26.0967	39.4	0.59433	1.1699e-13	6.32902e-12	NADSYN1	PREDICTED: glutamine-dependent NAD(+) synthetase isoform X1 [Sus scrofa]	Metabolism;Metabolism	Global and overview maps;Metabolism of cofactors and vitamins	ko01100//Metabolic pathways;ko00760//Nicotinate and nicotinamide metabolism	K01950;K01950	-	-	-
LOC100520618	357	394	402	266	265	232	22.96	21.48	22.1	13.02	13.71	13.17	22.18	13.3	-0.737833	1.18028e-13	6.35665e-12	ODC1	PREDICTED: ornithine decarboxylase-like [Sus scrofa]	Metabolism;Metabolism;Metabolism	Global and overview maps;Metabolism of other amino acids;Amino acid metabolism	ko01100//Metabolic pathways;ko00480//Glutathione metabolism;ko00330//Arginine and proline metabolism	K01581;K01581;K01581	-	-	-
LOC397027	2808	3145	3218	4609	4467	3874	107.63	102.12	105.51	134.6	137.89	131.17	105.087	134.553	0.356598	1.36039e-13	7.26183e-12	CAPN1	calpain-1 catalytic subunit [Sus scrofa]	Cellular Processes;Human Diseases;Genetic Information Processing;Cellular Processes;Cellular Processes	Cell growth and death;Neurodegenerative diseases;Folding, sorting and degradation;Cell growth and death;Cell growth and death	ko04217//Necroptosis;ko05010//Alzheimer disease;ko04141//Protein processing in endoplasmic reticulum;ko04218//Cellular senescence;ko04210//Apoptosis	K01367;K01367;K01367;K01367;K01367	-	-	-
LOC100519549	45	57	58	178	161	158	0.5	0.54	0.55	1.51	1.44	1.55	0.53	1.5	1.5009	1.45145e-13	7.71379e-12	EPHB2	PREDICTED: ephrin type-B receptor 2 isoform X1 [Orcinus orca]	Organismal Systems	Development	ko04360//Axon guidance	K05111	-	-	-
LOC396949	340	394	444	286	265	208	17.15	16.86	19.18	11.01	10.73	9.28	17.73	10.34	-0.777956	1.51296e-13	8.00542e-12	FAAH	fatty-acid amide hydrolase 1 [Sus scrofa]	Organismal Systems	Nervous system	ko04723//Retrograde endocannabinoid signaling	K15528	-	-	-
LOC100736741	358	446	431	794	796	632	10.84	11.44	11.15	18.3	19.39	16.88	11.1433	18.19	0.706965	1.77867e-13	9.32951e-12	Map3k11	PREDICTED: mitogen-activated protein kinase kinase kinase 11 [Orcinus orca]	Environmental Information Processing;Human Diseases	Signal transduction;Endocrine and metabolic diseases	ko04010//MAPK signaling pathway;ko04932//Non-alcoholic fatty liver disease (NAFLD)	K04419;K04419	-	-	-
LOC100271728	165	206	162	410	360	401	5.16	5.26	3.85	9.42	9.33	10.73	4.75667	9.82667	1.04675	1.8133e-13	9.46998e-12	TRPC6	PREDICTED: short transient receptor potential channel 6 isoform X2 [Sus scrofa]	Organismal Systems;Environmental Information Processing	Development;Signal transduction	ko04360//Axon guidance;ko04022//cGMP - PKG signaling pathway	K04969;K04969	-	-	-
LOC102158881	1052	1215	1165	1854	1773	1586	15.11	14.8	14.3	20.28	20.49	20.11	14.7367	20.2933	0.461596	1.8925e-13	9.841e-12	NOTCH3	PREDICTED: neurogenic locus notch homolog protein 3 [Bos taurus]	Human Diseases;Human Diseases;Human Diseases;Human Diseases;Environmental Information Processing;Organismal Systems;Organismal Systems;Human Diseases;Environmental Information Processing	Cancers;Infectious diseases;Cancers;Cancers;Signal transduction;Endocrine system;Immune system;Drug resistance;Signal transduction	ko05200//Pathways in cancer;ko05165//Human papillomavirus infection;ko05206//MicroRNAs in cancer;ko05224//Breast cancer;ko04371//Apelin signaling pathway;ko04919//Thyroid hormone signaling pathway;ko04658//Th1 and Th2 cell differentiation;ko01522//Endocrine resistance;ko04330//Notch signaling pathway	K20995;K20995;K20995;K20995;K20995;K20995;K20995;K20995;K20995	-	-	-
LOC100625022	1101	1315	1289	1130	1053	984	40.3	40.89	40.64	31.46	31.14	31.79	40.61	31.4633	-0.368164	2.05334e-13	1.06315e-11	Rab6a	PREDICTED: ras-related protein Rab-6A isoform X1 [Oryctolagus cuniculus]	-	-	-	-	-	-	-
LOC106504088	923	981	987	851	776	722	20.88	18.81	19.09	14.66	14.13	14.42	19.5933	14.4033	-0.44396	2.22873e-13	1.14903e-11	KLHL21	PREDICTED: kelch-like protein 21 [Sus scrofa]	-	-	-	-	-	-	-
LOC100737210	1694	1894	2007	2928	2619	2585	71.1	67.41	72	93.56	88.45	95.75	70.17	92.5867	0.39995	2.69775e-13	1.38492e-11	NCL	PREDICTED: nucleolin isoform X1 [Sus scrofa]	Human Diseases	Infectious diseases	ko05130//Pathogenic Escherichia coli infection	K11294	-	-	-
LOC100157079	482	498	538	1004	803	868	11.09	9.7	10.57	17.56	14.84	17.6	10.4533	16.6667	0.673003	2.71877e-13	1.3898e-11	SLC16A12	PREDICTED: monocarboxylate transporter 12 isoform X1 [Sus scrofa]	-	-	-	-	-	-	-
LOC110259297	1026	1230	1161	1033	956	894	52.68	54.57	50.2	43.76	40.89	44.42	52.4833	43.0233	-0.28674	3.16837e-13	1.61279e-11	Rras2	PREDICTED: ras-related protein R-Ras2 isoform X1 [Bos taurus]	Environmental Information Processing;Human Diseases;Environmental Information Processing;Cellular Processes;Environmental Information Processing;Human Diseases;Cellular Processes;Environmental Information Processing;Environmental Information Processing;Cellular Processes;Organismal Systems;Cellular Processes	Signal transduction;Infectious diseases;Signal transduction;Cell motility;Signal transduction;Cancers;Cell growth and death;Signal transduction;Signal transduction;Transport and catabolism;Immune system;Transport and catabolism	ko04010//MAPK signaling pathway;ko05166//HTLV-I infection;ko04014//Ras signaling pathway;ko04810//Regulation of actin cytoskeleton;ko04024//cAMP signaling pathway;ko05205//Proteoglycans in cancer;ko04218//Cellular senescence;ko04072//Phospholipase D signaling pathway;ko04371//Apelin signaling pathway;ko04140//Autophagy - animal;ko04625//C-type lectin receptor signaling pathway;ko04137//Mitophagy …	K07830;K07830;K07830;K07830;K07830;K07830;K07830;K07830;K07830;K07830;K07830;K07830	-	-	-
LOC100625277	932	1152	1137	985	899	787	87.88	92.09	91.86	70.71	68.21	65.68	90.61	68.2	-0.409899	3.29974e-13	1.67261e-11	Upp1	PREDICTED: uridine phosphorylase 1 [Lipotes vexillifer]	Metabolism;Metabolism;Metabolism	Global and overview maps;Nucleotide metabolism;Xenobiotics biodegradation and metabolism	ko01100//Metabolic pathways;ko00240//Pyrimidine metabolism;ko00983//Drug metabolism - other enzymes	K00757;K00757;K00757	-	-	-
LOC100155438	731	738	778	1353	1246	1087	14.06	12.04	12.79	19.82	19.29	18.46	12.9633	19.19	0.565918	3.40506e-13	1.71877e-11	Fam83f	PREDICTED: protein FAM83F [Sus scrofa]	-	-	-	-	-	-	-
LOC100524105	320	403	427	255	250	248	6.66	7.11	7.59	4.04	4.19	4.55	7.12	4.26	-0.741024	3.48669e-13	1.75264e-11	YPEL2	Protein yippee-like 2, partial [Anas platyrhynchos]	-	-	-	-	-	-	-
LOC100329222	306	392	442	726	720	629	6.9	7.5	8.52	12.47	13.07	12.52	7.64	12.6867	0.731669	3.93243e-13	1.9685e-11	PPRC1	PREDICTED: peroxisome proliferator-activated receptor gamma coactivator-related protein 1 isoform X1 [Sus scrofa]	-	-	-	-	-	-	-
LOC100521086	1636	1949	1804	1633	1663	1397	54.74	55.52	51.69	41.88	44.64	40.99	53.9833	42.5033	-0.344938	4.39072e-13	2.18883e-11	MOV10L1	PREDICTED: putative helicase MOV-10 isoform X1 [Sus scrofa]	-	-	-	-	-	-	-
LOC100519653	987	1182	1190	997	980	840	85.91	87.15	88.45	65.89	68.16	64.45	87.17	66.1667	-0.397727	4.79309e-13	2.36016e-11	Capg	PREDICTED: macrophage-capping protein [Sus scrofa]	-	-	-	-	-	-	-
LOC397078	1144	1303	1327	1997	1872	1739	48.9	47.23	48.49	65	64.42	65.6	48.2067	65.0067	0.431355	5.57449e-13	2.73376e-11	TGFB1	transforming growth factor beta 1 [Sus scrofa]	Human Diseases;Environmental Information Processing;Environmental Information Processing;Human Diseases;Human Diseases;Human Diseases;Human Diseases;Cellular Processes;Human Diseases;Human Diseases;Environmental Information Processing;Human Diseases;Organismal Systems;Organismal Systems;Environmental Information Processing;Cellular Processes;Organismal Systems;Human Diseases;Human Diseases;Human …	Cancers;Signal transduction;Signaling molecules and interaction;Infectious diseases;Cancers;Infectious diseases;Cancers;Cell growth and death;Endocrine and metabolic diseases;Infectious diseases;Signal transduction;Cancers;Development;Endocrine system;Signal transduction;Cell growth and death;Immune system;Infectious diseases;Infectious diseases;Infectious diseases;Endocrine and metabolic disease…	ko05200//Pathways in cancer;ko04010//MAPK signaling pathway;ko04060//Cytokine-cytokine receptor interaction;ko05166//HTLV-I infection;ko05205//Proteoglycans in cancer;ko05152//Tuberculosis;ko05225//Hepatocellular carcinoma;ko04218//Cellular senescence;ko04932//Non-alcoholic fatty liver disease (NAFLD);ko05161//Hepatitis B;ko04390//Hippo signaling pathway;ko05226//Gastric cancer;ko04380//Osteoclas…	K13375;K13375;K13375;K13375;K13375;K13375;K13375;K13375;K13375;K13375;K13375;K13375;K13375;K13375;K13375;K13375;K13375;K13375;K13375;K13375;K13375;K13375;K13375;K13375;K13375;K13375;K13375;K13375;K13375;K13375;K13375;K13375;K13375	-	-	-
LOC100519997	1059	1223	1106	1846	1877	1577	11.86	11.61	10.58	15.74	16.91	15.58	11.35	16.0767	0.502276	5.65906e-13	2.764e-11	MXRA5	PREDICTED: matrix-remodeling-associated protein 5 [Sus scrofa]	-	-	-	-	-	-	-
LOC100515084	307	333	297	650	610	513	5.1	4.69	4.22	8.22	8.16	7.52	4.67	7.96667	0.770554	5.85117e-13	2.84631e-11	ZC3H4	PREDICTED: LOW QUALITY PROTEIN: zinc finger CCCH domain-containing protein 4 [Sus scrofa]	-	-	-	-	-	GO:0043169//cation binding	-
LOC100626166	1249	1376	1295	2077	1989	1860	58.98	55.09	52.27	74.67	75.57	77.51	55.4467	75.9167	0.453316	6.74905e-13	3.2699e-11	AJUBA	PREDICTED: LIM domain-containing protein ajuba isoform X1 [Vicugna pacos]	Environmental Information Processing;Environmental Information Processing	Signal transduction;Signal transduction	ko04390//Hippo signaling pathway;ko04392//Hippo signaling pathway - multiple species	K16682;K16682	-	-	-
LOC102167684	799	901	886	1380	1416	1278	14.62	14.42	14.41	18.67	19.89	20.42	14.4833	19.66	0.44087	6.87151e-13	3.31592e-11	C6orf132	PREDICTED: uncharacterized protein C6orf132 homolog isoform X1 [Capra hircus]	-	-	-	-	-	-	-
LOC100517513	884	993	978	1611	1471	1327	14.48	13.8	13.7	20.11	19.41	19.2	13.9933	19.5733	0.48415	7.23323e-13	3.47656e-11	PCNX3	PREDICTED: pecanex-like protein 3 isoform X1 [Felis catus]	-	-	-	-	-	-	-
LOC100155947	135	166	175	88	72	62	6.5	6.99	7.72	3.13	2.7	2.57	7.07	2.8	-1.33628	7.6318e-13	3.65357e-11	DERL3	PREDICTED: derlin-3 isoform X1 [Sus scrofa]	Genetic Information Processing	Folding, sorting and degradation	ko04141//Protein processing in endoplasmic reticulum	K13989	-	-	-
LOC100737739	251	314	297	181	185	163	17.6	18.67	17.8	9.66	10.44	10.09	18.0233	10.0633	-0.840758	8.25648e-13	3.937e-11	RND1	PREDICTED: rho-related GTP-binding protein Rho6 [Sus scrofa]	Organismal Systems	Development	ko04360//Axon guidance	K07531	-	-	-
LOC100519916	2003	2339	2270	3391	3362	2821	35.66	35.3	34.54	45.96	48.16	44.32	35.1667	46.1467	0.392018	8.51281e-13	4.04325e-11	EVPL	PREDICTED: envoplakin [Sus scrofa]	-	-	-	-	-	-	-
LOC106504153	10585	11990	12329	16655	14951	14996	63.1	60.59	62.82	75.58	71.71	78.89	62.17	75.3933	0.278218	9.56629e-13	4.52579e-11	AHNAK	PREDICTED: LOW QUALITY PROTEIN: neuroblast differentiation-associated protein AHNAK [Galeopterus variegatus]	-	-	-	-	-	-	-
LOC100525134	96	91	80	244	235	214	1.98	1.57	1.36	3.82	3.92	3.94	1.63667	3.89333	1.25025	9.84869e-13	4.6412e-11	TRMT9B	PREDICTED: probable tRNA methyltransferase 9-like protein isoform X1 [Sus scrofa]	-	-	-	-	-	-	-
MSTRG.22998	409	593	468	319	353	302	92.34	113.49	90.3	54.83	64.12	60.17	98.71	59.7067	-0.725304	1.11884e-12	5.23164e-11	--	-	-	-	-	-	-	-	-
LOC100513161	6255	7405	7254	10043	9119	8517	198.21	198.92	196.47	242.28	232.5	238.18	197.867	237.653	0.26433	1.31361e-12	6.09517e-11	TNFRSF21	PREDICTED: LOW QUALITY PROTEIN: tumor necrosis factor receptor superfamily member 21 [Sus scrofa]	Environmental Information Processing	Signaling molecules and interaction	ko04060//Cytokine-cytokine receptor interaction	K05157	-	-	-
LOC100517006	245	268	279	606	446	518	11.81	10.69	11.41	22.04	17	21.67	11.3033	20.2367	0.840223	1.64813e-12	7.61801e-11	Igsf5	PREDICTED: immunoglobulin superfamily member 5 isoform X1 [Sus scrofa]	Cellular Processes;Human Diseases	Cellular community - eukaryotes;Infectious diseases	ko04530//Tight junction;ko05120//Epithelial cell signaling in Helicobacter pylori infection	K06786;K06786	-	-	-
LOC100516689	416	508	552	395	349	313	17.22	17.83	19.53	12.45	11.63	11.44	18.1933	11.84	-0.619741	1.93152e-12	8.89386e-11	C1orf115	PREDICTED: uncharacterized protein C1orf115 homolog [Sus scrofa]	-	-	-	-	-	-	-
LOC100512013	587	612	619	426	488	412	41.82	36.96	37.69	23.1	27.97	25.9	38.8233	25.6567	-0.59759	2.34123e-12	1.07394e-10	ALDOC	sperm-associated antigen 5 [Camelus ferus]	Metabolism;Metabolism;Environmental Information Processing;Metabolism;Metabolism;Metabolism;Metabolism	Global and overview maps;Global and overview maps;Signal transduction;Global and overview maps;Carbohydrate metabolism;Carbohydrate metabolism;Carbohydrate metabolism	ko01100//Metabolic pathways;ko01200//Carbon metabolism;ko04066//HIF-1 signaling pathway;ko01230//Biosynthesis of amino acids;ko00010//Glycolysis / Gluconeogenesis;ko00051//Fructose and mannose metabolism;ko00030//Pentose phosphate pathway	K01623;K01623;K01623;K01623;K01623;K01623;K01623	-	-	-
LOC100520131	472	510	558	937	857	780	21.88	20.11	21.19	31.34	31.52	32	21.06	31.62	0.586332	2.52871e-12	1.15554e-10	OSR1	PREDICTED: protein odd-skipped-related 1 [Equus przewalskii]	-	-	-	-	-	-	-
LOC654298	133	136	130	347	299	259	12.06	10.46	10.08	23.96	21.82	20.73	10.8667	22.17	1.0287	2.6018e-12	1.18446e-10	ID2	DNA-binding protein inhibitor ID-2 [Sus scrofa]	Human Diseases;Environmental Information Processing;Cellular Processes;Environmental Information Processing	Cancers;Signal transduction;Cellular community - eukaryotes;Signal transduction	ko05202//Transcriptional misregulation in cancers;ko04390//Hippo signaling pathway;ko04550//Signaling pathways regulating pluripotency of stem cells;ko04350//TGF-beta signaling pathway	K17693;K17693;K17693;K17693	-	-	-
LOC100524350	481	564	549	958	828	883	6.1	6.06	5.95	9.24	8.43	9.87	6.03667	9.18	0.604742	3.04908e-12	1.38286e-10	PHACTR2	PREDICTED: phosphatase and actin regulator 2 [Sus scrofa]	-	-	-	-	-	-	-
LOC396913	1502	1673	1686	1526	1435	1378	144.2	136.16	138.35	111.54	110.85	116.75	139.57	113.047	-0.30407	3.12525e-12	1.4121e-10	JUN	PREDICTED: transcription factor AP-1 [Ovis aries musimon]	Human Diseases;Environmental Information Processing;Human Diseases;Human Diseases;Human Diseases;Environmental Information Processing;Human Diseases;Cellular Processes;Human Diseases;Human Diseases;Organismal Systems;Cellular Processes;Human Diseases;Human Diseases;Organismal Systems;Human Diseases;Human Diseases;Environmental Information Processing;Cellular Processes;Organismal Systems;Organisma…	Cancers;Signal transduction;Infectious diseases;Infectious diseases;Infectious diseases;Signal transduction;Infectious diseases;Cellular community - eukaryotes;Infectious diseases;Cancers;Immune system;Cellular community - eukaryotes;Endocrine and metabolic diseases;Infectious diseases;Endocrine system;Cardiovascular diseases;Cancers;Signal transduction;Cell growth and death;Development;Endocrine…	ko05200//Pathways in cancer;ko04010//MAPK signaling pathway;ko05166//HTLV-I infection;ko05168//Herpes simplex infection;ko05169//Epstein-Barr virus infection;ko04024//cAMP signaling pathway;ko05167//Kaposi sarcoma-associated herpesvirus infection;ko04510//Focal adhesion;ko05164//Influenza A;ko05203//Viral carcinogenesis;ko04621//NOD-like receptor signaling pathway;ko04530//Tight junction;ko04932/…	K04448;K04448;K04448;K04448;K04448;K04448;K04448;K04448;K04448;K04448;K04448;K04448;K04448;K04448;K04448;K04448;K04448;K04448;K04448;K04448;K04448;K04448;K04448;K04448;K04448;K04448;K04448;K04448;K04448;K04448;K04448;K04448;K04448;K04448;K04448;K04448;K04448;K04448;K04448;K04448;K04448;K04448;K04448;K04448;K04448;K04448;K04448;K04448	-	-	-
LOC100738292	425	501	434	844	857	687	20.56	20.55	17.95	31.09	33.36	29.33	19.6867	31.26	0.667099	3.97738e-12	1.7761e-10	SPHK2	PREDICTED: sphingosine kinase 2 isoform X2 [Sus scrofa]	Metabolism;Environmental Information Processing;Human Diseases;Environmental Information Processing;Environmental Information Processing;Environmental Information Processing;Organismal Systems;Environmental Information Processing;Metabolism	Global and overview maps;Signal transduction;Infectious diseases;Signal transduction;Signal transduction;Signal transduction;Immune system;Signal transduction;Lipid metabolism	ko01100//Metabolic pathways;ko04020//Calcium signaling pathway;ko05152//Tuberculosis;ko04072//Phospholipase D signaling pathway;ko04371//Apelin signaling pathway;ko04071//Sphingolipid signaling pathway;ko04666//Fc gamma R-mediated phagocytosis;ko04370//VEGF signaling pathway;ko00600//Sphingolipid metabolism	K04718;K04718;K04718;K04718;K04718;K04718;K04718;K04718;K04718	-	-	-
LOC100233191	690	846	813	685	643	567	33.28	34.6	33.49	25.15	24.95	24.11	33.79	24.7367	-0.449945	3.98975e-12	1.7761e-10	MAP2K1	PREDICTED: dual specificity mitogen-activated protein kinase kinase 1 isoform X2 [Homo sapiens]	Human Diseases;Environmental Information Processing;Human Diseases;Environmental Information Processing;Human Diseases;Environmental Information Processing;Cellular Processes;Environmental Information Processing;Environmental Information Processing;Human Diseases;Human Diseases;Cellular Processes;Human Diseases;Organismal Systems;Environmental Information Processing;Human Diseases;Human Diseases;…	Cancers;Signal transduction;Infectious diseases;Signal transduction;Infectious diseases;Signal transduction;Cell motility;Signal transduction;Signal transduction;Infectious diseases;Cancers;Cellular community - eukaryotes;Infectious diseases;Immune system;Signal transduction;Cancers;Cancers;Substance dependence;Cell growth and death;Infectious diseases;Endocrine and metabolic diseases;Signal tran…	ko05200//Pathways in cancer;ko04151//PI3K-Akt signaling pathway;ko05165//Human papillomavirus infection;ko04010//MAPK signaling pathway;ko05163//Human cytomegalovirus infection;ko04014//Ras signaling pathway;ko04810//Regulation of actin cytoskeleton;ko04015//Rap1 signaling pathway;ko04024//cAMP signaling pathway;ko05167//Kaposi sarcoma-associated herpesvirus infection;ko05205//Proteoglycans in ca…	K04368;K04368;K04368;K04368;K04368;K04368;K04368;K04368;K04368;K04368;K04368;K04368;K04368;K04368;K04368;K04368;K04368;K04368;K04368;K04368;K04368;K04368;K04368;K04368;K04368;K04368;K04368;K04368;K04368;K04368;K04368;K04368;K04368;K04368;K04368;K04368;K04368;K04368;K04368;K04368;K04368;K04368;K04368;K04368;K04368;K04368;K04368;K04368;K04368;K04368;K04368;K04368;K04368;K04368;K04368;K04368;K04368;…	-	-	-
LOC100516103	509	576	605	1034	886	856	10.34	9.91	10.31	15.7	14.45	15.19	10.1867	15.1133	0.56914	4.24755e-12	1.88391e-10	DAPK1	PREDICTED: death-associated protein kinase 1 isoform X4 [Balaenoptera acutorostrata scammoni]	Human Diseases;Cellular Processes;Human Diseases	Cancers;Transport and catabolism;Cancers	ko05200//Pathways in cancer;ko04140//Autophagy - animal;ko05219//Bladder cancer	K08803;K08803;K08803	-	-	-
LOC100157796	1497	1661	1733	2509	2356	2186	28.53	26.84	28.23	36.4	36.14	36.77	27.8667	36.4367	0.386851	4.61122e-12	2.03772e-10	TRAM2	PREDICTED: translocating chain-associated membrane protein 2 [Sus scrofa]	-	-	-	-	-	-	-
LOC100515686	720	807	784	663	627	575	75.21	71.46	70	52.73	52.7	53.01	72.2233	52.8133	-0.451563	5.06004e-12	2.2279e-10	TMEM92	PREDICTED: transmembrane protein 92 [Sus scrofa]	-	-	-	-	-	-	-
LOC780426	1046	1312	1185	1040	1056	864	78.36	84.37	77	64.53	65.08	58.86	79.91	62.8233	-0.347076	5.95001e-12	2.61021e-10	CCND3	PREDICTED: G1/S-specific cyclin-D3 [Felis catus]	Human Diseases;Environmental Information Processing;Human Diseases;Human Diseases;Cellular Processes;Human Diseases;Environmental Information Processing;Cellular Processes;Human Diseases;Environmental Information Processing;Environmental Information Processing;Cellular Processes;Cellular Processes	Cancers;Signal transduction;Infectious diseases;Infectious diseases;Cellular community - eukaryotes;Cancers;Signal transduction;Cell growth and death;Infectious diseases;Signal transduction;Signal transduction;Cell growth and death;Cell growth and death	ko05200//Pathways in cancer;ko04151//PI3K-Akt signaling pathway;ko05165//Human papillomavirus infection;ko05166//HTLV-I infection;ko04510//Focal adhesion;ko05203//Viral carcinogenesis;ko04630//Jak-STAT signaling pathway;ko04218//Cellular senescence;ko05162//Measles;ko04390//Hippo signaling pathway;ko04310//Wnt signaling pathway;ko04110//Cell cycle;ko04115//p53 signaling pathway	K10152;K10152;K10152;K10152;K10152;K10152;K10152;K10152;K10152;K10152;K10152;K10152;K10152	-	-	-
LOC397117	552	748	709	530	519	495	73.18	84.06	80.34	53.49	55.36	57.91	79.1933	55.5867	-0.51064	7.86463e-12	3.42523e-10	GSTO1	glutathione S-transferase omega-1 [Sus scrofa]	Human Diseases;Human Diseases;Human Diseases;Human Diseases;Human Diseases;Human Diseases;Metabolism;Metabolism;Metabolism;Metabolism	Cancers;Cancers;Cardiovascular diseases;Cancers;Cancers;Drug resistance;Xenobiotics biodegradation and metabolism;Xenobiotics biodegradation and metabolism;Xenobiotics biodegradation and metabolism;Metabolism of other amino acids	ko05200//Pathways in cancer;ko05225//Hepatocellular carcinoma;ko05418//Fluid shear stress and atherosclerosis;ko05215//Prostate cancer;ko05204//Chemical carcinogenesis;ko01524//Platinum drug resistance;ko00983//Drug metabolism - other enzymes;ko00980//Metabolism of xenobiotics by cytochrome P450;ko00982//Drug metabolism - cytochrome P450;ko00480//Glutathione metabolism	K00799;K00799;K00799;K00799;K00799;K00799;K00799;K00799;K00799;K00799	-	-	-
LOC110259541	551	713	626	1201	1032	901	8.93	9.69	8.57	14.72	13.41	12.8	9.06333	13.6433	0.590083	1.01081e-11	4.37077e-10	NDST1	PREDICTED: bifunctional heparan sulfate N-deacetylase/N-sulfotransferase 1 [Canis lupus familiaris]	Metabolism;Metabolism	Global and overview maps;Glycan biosynthesis and metabolism	ko01100//Metabolic pathways;ko00534//Glycosaminoglycan biosynthesis - heparan sulfate / heparin	K02576;K02576	-	-	-
LOC100522018	191	255	246	138	139	127	5.67	6.42	6.25	3.12	3.32	3.33	6.11333	3.25667	-0.908563	1.09973e-11	4.72139e-10	GCLC	PREDICTED: glutamate--cysteine ligase catalytic subunit isoform X1 [Sus scrofa]	Metabolism;Metabolism;Metabolism;Cellular Processes	Global and overview maps;Metabolism of other amino acids;Amino acid metabolism;Cell growth and death	ko01100//Metabolic pathways;ko00480//Glutathione metabolism;ko00270//Cysteine and methionine metabolism;ko04216//Ferroptosis	K11204;K11204;K11204;K11204	-	-	-
LOC100625861	978	1128	1066	1707	1598	1459	21	20.59	19.67	27.77	27.38	27.74	20.42	27.63	0.436253	1.11872e-11	4.78592e-10	n4bp3-b	ProSAP-interacting protein 1 [Bos mutus]	-	-	-	-	-	-	-
LOC100524545	1013	1119	1158	1754	1614	1540	27.67	25.91	27.06	36.47	35.48	37.13	26.88	36.36	0.435819	1.13947e-11	4.84317e-10	PCSK6	PREDICTED: proprotein convertase subtilisin/kexin type 6, partial [Cercocebus atys]	-	-	-	-	-	-	-
LOC100520645	1337	1579	1642	1456	1272	1297	41.78	41.82	43.86	34.63	31.99	35.75	42.4867	34.1233	-0.316252	1.14014e-11	4.84317e-10	CCNYL1	PREDICTED: cyclin-Y-like protein 1 isoform X1 [Sus scrofa]	-	-	-	-	-	-	-
LOC100511011	1518	1703	1701	2605	2337	2153	20.03	18.73	18.85	25.94	24.55	24.82	19.2033	25.1033	0.386522	1.20902e-11	5.11778e-10	Srrm2	serine/arginine repetitive matrix protein 2 [Sus scrofa]	-	-	-	-	-	-	-
LOC396750	1280	1453	1413	1329	1234	1092	61.09	58.79	57.64	48.29	47.39	45.99	59.1733	47.2233	-0.325447	1.23037e-11	5.17224e-10	ICAM1	intercellular adhesion molecule 1 precursor [Sus scrofa]	Human Diseases;Human Diseases;Human Diseases;Human Diseases;Environmental Information Processing;Human Diseases;Organismal Systems;Environmental Information Processing;Organismal Systems;Environmental Information Processing;Human Diseases;Human Diseases;Human Diseases;Human Diseases;Human Diseases;Human Diseases	Infectious diseases;Infectious diseases;Infectious diseases;Infectious diseases;Signaling molecules and interaction;Cardiovascular diseases;Immune system;Signal transduction;Immune system;Signal transduction;Endocrine and metabolic diseases;Immune diseases;Infectious diseases;Cardiovascular diseases;Infectious diseases;Infectious diseases	ko05166//HTLV-I infection;ko05169//Epstein-Barr virus infection;ko05167//Kaposi sarcoma-associated herpesvirus infection;ko05164//Influenza A;ko04514//Cell adhesion molecules (CAMs);ko05418//Fluid shear stress and atherosclerosis;ko04650//Natural killer cell mediated cytotoxicity;ko04668//TNF signaling pathway;ko04670//Leukocyte transendothelial migration;ko04064//NF-kappa B signaling pathway;ko0…	K06490;K06490;K06490;K06490;K06490;K06490;K06490;K06490;K06490;K06490;K06490;K06490;K06490;K06490;K06490;K06490	-	-	-
LOC808509	563	494	510	1038	964	815	220.4	163.94	170.64	309.35	303.63	281.55	184.993	298.177	0.688694	1.24936e-11	5.23343e-10	MT-ND4L	NADH dehydrogenase subunit 4L (mitochondrion) [Sus scrofa]	Metabolism;Organismal Systems;Organismal Systems;Human Diseases;Metabolism	Global and overview maps;Environmental adaptation;Nervous system;Neurodegenerative diseases;Energy metabolism	ko01100//Metabolic pathways;ko04714//Thermogenesis;ko04723//Retrograde endocannabinoid signaling;ko05012//Parkinson disease;ko00190//Oxidative phosphorylation	K03882;K03882;K03882;K03882;K03882	-	-	-
LOC100271903	984	1156	1113	993	964	810	46.37	46.39	45.3	36.04	36.94	34.43	46.02	35.8033	-0.362167	1.46617e-11	6.09927e-10	TNIP1	TNFAIP3-interacting protein 1 [Sus scrofa]	-	-	-	-	-	-	-
LOC110256142	1456	1692	1652	2450	2323	2102	43.46	42.72	42.2	55.87	55.64	55.52	42.7933	55.6767	0.379687	1.85245e-11	7.6534e-10	MPRIP	PREDICTED: myosin phosphatase Rho-interacting protein isoform X3 [Capra hircus]	-	-	-	-	-	-	-
LOC100513084	233	255	304	185	163	130	7.57	8.11	8.29	4.15	4.04	3.68	7.99	3.95667	-1.01391	1.8956e-11	7.80495e-10	CSF1	PREDICTED: macrophage colony-stimulating factor 1, partial [Sus scrofa]	Environmental Information Processing;Environmental Information Processing;Environmental Information Processing;Environmental Information Processing;Environmental Information Processing;Organismal Systems;Environmental Information Processing;Organismal Systems;Human Diseases	Signal transduction;Signal transduction;Signaling molecules and interaction;Signal transduction;Signal transduction;Development;Signal transduction;Immune system;Immune diseases	ko04151//PI3K-Akt signaling pathway;ko04010//MAPK signaling pathway;ko04060//Cytokine-cytokine receptor interaction;ko04014//Ras signaling pathway;ko04015//Rap1 signaling pathway;ko04380//Osteoclast differentiation;ko04668//TNF signaling pathway;ko04640//Hematopoietic cell lineage;ko05323//Rheumatoid arthritis	K05453;K05453;K05453;K05453;K05453;K05453;K05453;K05453;K05453	-	-	-
LOC100516289	337	375	380	669	689	561	8.82	8.36	8.54	13.44	14.63	13.05	8.57333	13.7067	0.67695	2.4234e-11	9.91049e-10	PFKFB3	PREDICTED: LOW QUALITY PROTEIN: 6-phosphofructo-2-kinase/fructose-2,6-bisphosphatase 3 [Sus scrofa]	Environmental Information Processing;Environmental Information Processing;Metabolism	Signal transduction;Signal transduction;Carbohydrate metabolism	ko04152//AMPK signaling pathway;ko04066//HIF-1 signaling pathway;ko00051//Fructose and mannose metabolism	K01103;K01103;K01103	-	-	-
LOC102160717	346	448	359	751	723	591	8.87	9.75	7.88	14.67	14.88	13.38	8.83333	14.31	0.695994	2.44142e-11	9.95042e-10	IGSF9	PREDICTED: protein turtle homolog A [Camelus dromedarius]	-	-	-	-	-	-	-
LOC100737128	484	658	573	963	1001	876	5.09	5.86	5.15	7.71	8.48	8.13	5.36667	8.10667	0.595083	2.47741e-11	1.00631e-09	SZT2	PREDICTED: protein SZT2 [Balaenoptera acutorostrata scammoni]	-	-	-	-	-	-	-
LOC110259317	924	1275	1206	1016	973	754	99.05	115.78	110.37	82.72	83.84	71.19	108.4	79.25	-0.451882	2.79405e-11	1.13112e-09	LSM4	PREDICTED: U6 snRNA-associated Sm-like protein LSm4 [Myotis brandtii]	Genetic Information Processing;Genetic Information Processing	Transcription;Folding, sorting and degradation	ko03040//Spliceosome;ko03018//RNA degradation	K12623;K12623	-	-	-
LOC100511389	480	606	634	980	960	848	19.87	21.26	22.43	30.88	31.97	30.97	21.1867	31.2733	0.561776	2.90989e-11	1.17408e-09	LEMD2	PREDICTED: LEM domain-containing protein 2 [Sus scrofa]	-	-	-	-	-	-	-
LOC733670	125	148	141	69	73	55	11.48	11.52	11.07	4.82	5.39	4.46	11.3567	4.89	-1.21563	3.56815e-11	1.43487e-09	RGS2	regulator of G-protein signaling 2 [Sus scrofa]	Organismal Systems;Environmental Information Processing;Organismal Systems	Sensory system;Signal transduction;Endocrine system	ko04740//Olfactory transduction;ko04022//cGMP - PKG signaling pathway;ko04921//Oxytocin signaling pathway	K18154;K18154;K18154	-	-	-
LOC110258335	652	760	777	652	605	479	19.01	18.77	19.37	14.46	14.18	12.32	19.05	13.6533	-0.480538	4.27509e-11	1.69654e-09	TNFAIP2	PREDICTED: tumor necrosis factor alpha-induced protein 2 [Lipotes vexillifer]	-	-	-	-	-	-	-
LOC100152427	1070	1204	1218	1813	1684	1649	25.89	24.6	24.75	33.18	32.5	35.28	25.08	33.6533	0.424212	4.44729e-11	1.75909e-09	SULF1	PREDICTED: extracellular sulfatase Sulf-1 isoform X2 [Ovis aries musimon]	-	-	-	-	-	-	-
LOC100520635	1060	1177	1154	1809	1698	1525	24.59	23.14	22.88	31.95	31.69	31.22	23.5367	31.62	0.425927	4.46655e-11	1.76093e-09	MYBBP1A	PREDICTED: myb-binding protein 1A [Sus scrofa]	-	-	-	-	-	-	-
LOC100624274	779	932	918	730	783	648	86.64	88.45	88.07	63.48	71.73	64.38	87.72	66.53	-0.398901	5.32625e-11	2.09303e-09	--	PREDICTED: FXYD domain-containing ion transport regulator 5 isoform X1 [Sus scrofa]	-	-	-	-	-	-	-
LOC100738060	514	632	541	987	896	868	11.58	12.09	10.43	16.97	16.25	17.27	11.3667	16.83	0.566226	5.71426e-11	2.23097e-09	PPFIA1	PREDICTED: liprin-alpha-1 isoform X1 [Vicugna pacos]	-	-	-	-	-	-	-
LOC100623148	242	270	293	194	129	163	3.01	2.85	3.12	1.84	1.29	1.79	2.99333	1.64	-0.868057	6.03597e-11	2.34896e-09	Slc7a11	PREDICTED: cystine/glutamate transporter [Sus scrofa]	Cellular Processes	Cell growth and death	ko04216//Ferroptosis	K13869	-	-	-
LOC396915	458	490	437	371	340	254	28.96	26.26	23.61	17.86	17.3	14.17	26.2767	16.4433	-0.676279	6.20151e-11	2.40563e-09	EDN1	PREDICTED: endothelin-1 isoform X2 [Sus scrofa]	Human Diseases;Organismal Systems;Environmental Information Processing;Environmental Information Processing;Human Diseases;Organismal Systems	Cardiovascular diseases;Endocrine system;Signal transduction;Signal transduction;Endocrine and metabolic diseases;Endocrine system	ko05418//Fluid shear stress and atherosclerosis;ko04926//Relaxin signaling pathway;ko04668//TNF signaling pathway;ko04066//HIF-1 signaling pathway;ko04933//AGE-RAGE signaling pathway in diabetic complications;ko04916//Melanogenesis	K16366;K16366;K16366;K16366;K16366;K16366	-	-	-
LOC100514302	903	1072	1074	1596	1564	1382	36.41	36.35	37.22	48.43	50.28	47.75	36.66	48.82	0.413266	6.59335e-11	2.54128e-09	LETM1	LETM1 and EF-hand domain-containing protein 1, mitochondrial [Sus scrofa]	-	-	-	-	GO:0019866//organelle inner membrane;GO:0031224//intrinsic component of membrane;GO:0043231//intracellular membrane-bounded organelle	GO:0043169//cation binding	GO:0007007//inner mitochondrial membrane organization
LOC100512201	354	354	400	706	625	595	7.07	6.01	6.84	10.75	10.07	10.51	6.64	10.4433	0.653327	6.72136e-11	2.57418e-09	PODXL	PREDICTED: podocalyxin isoform X1 [Sus scrofa]	-	-	-	-	-	-	-
LOC100156612	1040	1240	1014	902	905	868	18.06	18.08	15.19	11.83	12.49	13.19	17.11	12.5033	-0.452527	6.82172e-11	2.60434e-09	KATNAL1	PREDICTED: katanin p60 ATPase-containing subunit A-like 1 isoform X2 [Sus scrofa]	-	-	-	-	-	-	-
LOC100737806	989	1186	1222	1097	932	908	31.3	31.82	33.05	26.43	23.73	25.36	32.0567	25.1733	-0.348728	7.49891e-11	2.83595e-09	MTHFD2	PREDICTED: bifunctional methylenetetrahydrofolate dehydrogenase/cyclohydrolase, mitochondrial [Sus scrofa]	Metabolism;Metabolism	Global and overview maps;Metabolism of cofactors and vitamins	ko01100//Metabolic pathways;ko00670//One carbon pool by folate	K13403;K13403	-	-	-
LOC397682	336	370	439	289	237	260	38.08	35.53	42.51	24.93	21.61	25.99	38.7067	24.1767	-0.678967	7.73889e-11	2.91756e-09	GSTA2	glutathione S-transferase alpha M14 [Sus scrofa]	Human Diseases;Human Diseases;Human Diseases;Human Diseases;Human Diseases;Human Diseases;Metabolism;Metabolism;Metabolism;Metabolism	Cancers;Cancers;Cardiovascular diseases;Cancers;Cancers;Drug resistance;Xenobiotics biodegradation and metabolism;Xenobiotics biodegradation and metabolism;Xenobiotics biodegradation and metabolism;Metabolism of other amino acids	ko05200//Pathways in cancer;ko05225//Hepatocellular carcinoma;ko05418//Fluid shear stress and atherosclerosis;ko05215//Prostate cancer;ko05204//Chemical carcinogenesis;ko01524//Platinum drug resistance;ko00983//Drug metabolism - other enzymes;ko00980//Metabolism of xenobiotics by cytochrome P450;ko00982//Drug metabolism - cytochrome P450;ko00480//Glutathione metabolism	K00799;K00799;K00799;K00799;K00799;K00799;K00799;K00799;K00799;K00799	-	-	-
LOC100514482	538	706	672	1051	995	1019	82.9	91.76	89.32	125.6	123.24	140.36	87.9933	129.733	0.560083	8.36401e-11	3.14341e-09	AGR2	anterior gradient protein 2 homolog precursor [Sus scrofa]	-	-	-	-	GO:0043231//intracellular membrane-bounded organelle	GO:0001948//glycoprotein binding	GO:0002067//glandular epithelial cell differentiation;GO:0007589//body fluid secretion
LOC100516755	444	594	482	396	387	328	21.22	23.98	20.15	14.36	14.59	13.68	21.7833	14.21	-0.616318	8.54282e-11	3.20064e-09	ETV4	PREDICTED: ETS translocation variant 4 isoform X4 [Sus scrofa]	Human Diseases	Cancers	ko05202//Transcriptional misregulation in cancers	K15592	-	-	-
MSTRG.4664	284	276	348	681	501	546	4.22	3.47	4.43	7.71	5.99	7.17	4.04	6.95667	0.784041	8.64931e-11	3.2305e-09	pol	polyprotein [Sus scrofa]	-	-	-	-	-	-	-
LOC100515954	222	275	255	160	150	159	51.52	54.1	50.58	28.27	28.01	32.56	52.0667	29.6133	-0.814113	8.97784e-11	3.33257e-09	Cda	cytidine deaminase [Sus scrofa]	Metabolism;Metabolism;Metabolism	Global and overview maps;Nucleotide metabolism;Xenobiotics biodegradation and metabolism	ko01100//Metabolic pathways;ko00240//Pyrimidine metabolism;ko00983//Drug metabolism - other enzymes	K01489;K01489;K01489	-	-	-
LOC100514410	650	904	845	1367	1275	1117	18.71	22.05	20.79	29.96	29.53	28.38	20.5167	29.29	0.513612	9.59976e-11	3.5525e-09	ICMT	protein-S-isoprenylcysteine O-methyltransferase [Sus scrofa]	Metabolism	Metabolism of terpenoids and polyketides	ko00900//Terpenoid backbone biosynthesis	K00587	GO:0031224//intrinsic component of membrane;GO:0043231//intracellular membrane-bounded organelle	GO:0003880//protein C-terminal carboxyl O-methyltransferase activity;GO:0008134//transcription factor binding	GO:0006479//protein methylation;GO:0010556//regulation of macromolecule biosynthetic process;GO:0033036//macromolecule localization;GO:0040007//growth;GO:0042127//regulation of cell proliferation;GO:0044767//single-organism developmental process;GO:0051056//regulation of small GTPase mediated signal transduction
LOC100154308	979	1106	1103	945	957	846	70.68	67.34	67.91	51.85	55.43	53.75	68.6433	53.6767	-0.354825	9.64986e-11	3.56012e-09	TANGO2	PREDICTED: transport and Golgi organization protein 2 homolog isoform X2 [Sus scrofa]	-	-	-	-	-	-	-
LOC100739254	865	1015	1050	1598	1409	1370	42.87	42.7	44.53	60.45	56.37	60.32	43.3667	59.0467	0.445269	9.96914e-11	3.65555e-09	ANKRD29	PREDICTED: ankyrin repeat domain-containing protein 29 [Odobenus rosmarus divergens]	-	-	-	-	-	-	-
LOC100517416	179	244	206	149	98	101	6.09	7.03	5.99	3.86	2.68	3.03	6.37	3.19	-0.997737	1.01484e-10	3.70728e-09	Dusp10	PREDICTED: dual specificity protein phosphatase 10 [Sus scrofa]	Environmental Information Processing	Signal transduction	ko04010//MAPK signaling pathway	K20216	-	-	-
LOC106505804	3969	4685	4853	6539	5843	5859	108.64	108.69	113.52	136.24	128.68	141.51	110.283	135.477	0.29683	1.01717e-10	3.70728e-09	pol	pol protein, partial (endogenous virus) [Sus scrofa]	-	-	-	-	-	-	-
LOC100302020	2562	2976	2937	4103	3989	3525	229.79	228.71	230.03	281.33	289.45	278.85	229.51	283.21	0.303315	1.0375e-10	3.76999e-09	CLDN6	claudin-6 [Sus scrofa]	Cellular Processes;Environmental Information Processing;Human Diseases;Organismal Systems;Human Diseases	Cellular community - eukaryotes;Signaling molecules and interaction;Infectious diseases;Immune system;Infectious diseases	ko04530//Tight junction;ko04514//Cell adhesion molecules (CAMs);ko05160//Hepatitis C;ko04670//Leukocyte transendothelial migration;ko05130//Pathogenic Escherichia coli infection	K06087;K06087;K06087;K06087;K06087	-	-	-
LOC100514839	3107	3624	3590	4935	4687	4269	24	23.73	23.7	29.02	29.13	29.1	23.81	29.0833	0.288625	1.04349e-10	3.7804e-09	LRP1	PREDICTED: prolow-density lipoprotein receptor-related protein 1 [Balaenoptera acutorostrata scammoni]	Human Diseases;Human Diseases;Organismal Systems	Neurodegenerative diseases;Infectious diseases;Digestive system	ko05010//Alzheimer disease;ko05144//Malaria;ko04979//Cholesterol metabolism	K04550;K04550;K04550	GO:0005774//vacuolar membrane;GO:0005924//cell-substrate adherens junction;GO:0016021//integral component of membrane;GO:0043234//protein complex	GO:0003723//RNA binding;GO:0005515//protein binding	GO:0006909//phagocytosis;GO:0010517//regulation of phospholipase activity;GO:0010642//negative regulation of platelet-derived growth factor receptor signaling pathway;GO:0010874//regulation of cholesterol efflux;GO:0014910//regulation of smooth muscle cell migration;GO:0016125//sterol metabolic process;GO:0032970//regulation of actin filament-based process;GO:0048844//artery morphogenesis
LOC100174954	151	147	166	98	69	67	4.46	3.68	4.19	2.2	1.64	1.74	4.11	1.86	-1.14384	1.24918e-10	4.49855e-09	KLF11	Krueppel-like factor 11 [Sus scrofa]	-	-	-	-	-	-	-
LOC100513307	626	747	698	615	565	499	48.59	49.15	46.3	36.34	35.28	34.18	48.0133	35.2667	-0.44513	1.32142e-10	4.74452e-09	DHRS11	dehydrogenase/reductase SDR family member 11 [Sus scrofa]	-	-	-	-	-	-	-
LOC100155110	853	996	1043	821	840	786	134.56	133.2	140.63	98.6	106.62	109.42	136.13	104.88	-0.376245	1.48614e-10	5.32013e-09	Cks1b	PREDICTED: cyclin-dependent kinases regulatory subunit 1 [Peromyscus maniculatus bairdii]	Human Diseases;Human Diseases	Cancers;Cancers	ko05200//Pathways in cancer;ko05222//Small cell lung cancer	K02219;K02219	-	-	-
LOC100125376	1416	1585	1680	1505	1422	1328	65.67	62.31	66.59	53.14	53.06	54.35	64.8567	53.5167	-0.277267	1.61084e-10	5.74946e-09	TES	testin [Sus scrofa]	-	-	-	-	-	-	-
LOC100156209	266	320	369	225	213	203	9.64	9.83	11.43	6.21	6.21	6.49	10.3	6.30333	-0.708457	1.91363e-10	6.81005e-09	GBE1	PREDICTED: 1,4-alpha-glucan-branching enzyme [Bison bison bison]	Metabolism;Metabolism	Global and overview maps;Carbohydrate metabolism	ko01100//Metabolic pathways;ko00500//Starch and sucrose metabolism	K00700;K00700	-	-	-
LOC110261080	934	1078	958	1578	1483	1439	21.66	21.19	18.99	27.86	27.67	29.45	20.6133	28.3267	0.458583	2.0683e-10	7.33882e-09	SKI	PREDICTED: ski oncogene isoform X3 [Ceratotherium simum simum]	-	-	-	-	-	-	-
LOC110256140	235	272	250	528	450	412	8.06	7.91	7.33	13.78	12.41	12.47	7.76667	12.8867	0.730512	2.51568e-10	8.84816e-09	FLCN	PREDICTED: folliculin [Ursus maritimus]	Environmental Information Processing;Human Diseases	Signal transduction;Cancers	ko04150//mTOR signaling pathway;ko05211//Renal cell carcinoma	K09594;K09594	-	-	-
LOC100312974	291	363	321	630	541	530	28.48	30.12	26.85	46.94	42.6	45.77	28.4833	45.1033	0.663116	2.77872e-10	9.71665e-09	Mat2a	S-adenosylmethionine synthetase isoform type-2 [Pteropus alecto]	Metabolism;Metabolism;Metabolism	Global and overview maps;Global and overview maps;Amino acid metabolism	ko01100//Metabolic pathways;ko01230//Biosynthesis of amino acids;ko00270//Cysteine and methionine metabolism	K00789;K00789;K00789	-	-	-
LOC100187577	119	149	144	76	72	59	3.24	3.81	3.58	1.51	1.6	1.22	3.54333	1.44333	-1.2957	2.89527e-10	1.00949e-08	Lrp8	PREDICTED: low-density lipoprotein receptor-related protein 8 isoform X1 [Sus scrofa]	-	-	-	-	-	-	-
LOC397538	1129	1279	1280	1232	1051	968	37.59	36.1	36.43	31.23	28.15	28.44	36.7067	29.2733	-0.326455	3.08925e-10	1.07403e-08	ME1	PREDICTED: NADP-dependent malic enzyme [Sus scrofa]	Metabolism;Metabolism;Organismal Systems;Metabolism	Global and overview maps;Global and overview maps;Endocrine system;Carbohydrate metabolism	ko01100//Metabolic pathways;ko01200//Carbon metabolism;ko03320//PPAR signaling pathway;ko00620//Pyruvate metabolism	K00029;K00029;K00029;K00029	-	-	-
LOC106510546	852	1002	971	847	849	722	31.96	31.87	31.14	24.19	25.63	23.9	31.6567	24.5733	-0.365416	3.74721e-10	1.29903e-08	Cyp2s1	PREDICTED: cytochrome P450 2S1 [Sus scrofa]	Metabolism;Metabolism;Metabolism	Global and overview maps;Metabolism of cofactors and vitamins;Xenobiotics biodegradation and metabolism	ko01100//Metabolic pathways;ko00830//Retinol metabolism;ko00980//Metabolism of xenobiotics by cytochrome P450	K07420;K07420;K07420	-	-	-
LOC100624902	1128	1322	1288	1953	1849	1617	66.3	65.87	64.71	87.39	87.45	83.88	65.6267	86.24	0.394075	4.07651e-10	1.40512e-08	KAZALD1	kazal-type serine protease inhibitor domain-containing protein 1 precursor [Sus scrofa]	-	-	-	-	-	-	-
LOC396898	1045	1136	1139	1032	957	922	98.38	90.66	91.65	73.96	72.49	76.6	93.5633	74.35	-0.331611	4.17701e-10	1.43565e-08	ATP1B1	PREDICTED: sodium/potassium-transporting ATPase subunit beta-1 [Sus scrofa]	Environmental Information Processing;Environmental Information Processing;Organismal Systems;Organismal Systems;Organismal Systems;Organismal Systems;Organismal Systems;Organismal Systems;Organismal Systems;Organismal Systems;Organismal Systems;Organismal Systems;Organismal Systems;Organismal Systems;Organismal Systems;Organismal Systems;Organismal Systems;Organismal Systems	Signal transduction;Signal transduction;Circulatory system;Endocrine system;Digestive system;Digestive system;Digestive system;Endocrine system;Digestive system;Circulatory system;Endocrine system;Digestive system;Endocrine system;Digestive system;Digestive system;Excretory system;Excretory system;Excretory system	ko04024//cAMP signaling pathway;ko04022//cGMP - PKG signaling pathway;ko04261//Adrenergic signaling in cardiomyocytes;ko04919//Thyroid hormone signaling pathway;ko04974//Protein digestion and absorption;ko04972//Pancreatic secretion;ko04976//Bile secretion;ko04925//Aldosterone synthesis and secretion;ko04970//Salivary secretion;ko04260//Cardiac muscle contraction;ko04911//Insulin secretion;ko0497…	K01540;K01540;K01540;K01540;K01540;K01540;K01540;K01540;K01540;K01540;K01540;K01540;K01540;K01540;K01540;K01540;K01540;K01540	-	-	-
LOC100520826	3088	3365	3587	4942	4412	4497	96.57	89.2	95.87	117.65	111.01	124.1	93.88	117.587	0.324835	4.94185e-10	1.67939e-08	EIF4G2	PREDICTED: eukaryotic translation initiation factor 4 gamma 2 [Loxodonta africana]	Genetic Information Processing;Human Diseases	Translation;Cardiovascular diseases	ko03013//RNA transport;ko05416//Viral myocarditis	K03260;K03260	-	-	-
LOC110260414	173	225	219	396	382	387	4.63	5.12	5.04	8.1	8.23	9.2	4.93	8.51	0.787571	5.05201e-10	1.71201e-08	--	PREDICTED: zinc finger protein 623 [Hipposideros armiger]	-	-	-	-	-	-	-
LOC100524966	351	399	386	682	627	591	5.78	5.49	5.34	8.41	8.23	8.45	5.53667	8.36333	0.59506	5.23829e-10	1.76583e-08	TNS3	PREDICTED: LOW QUALITY PROTEIN: tensin-3 [Sus scrofa]	-	-	-	-	-	-	-
LOC100126864	485	590	536	459	390	403	30.58	31.54	28.89	22.03	19.78	22.42	30.3367	21.41	-0.502778	5.2401e-10	1.76583e-08	IFNGR2	interferon gamma receptor 2 precursor [Sus scrofa]	Human Diseases;Environmental Information Processing;Human Diseases;Human Diseases;Human Diseases;Cellular Processes;Environmental Information Processing;Human Diseases;Organismal Systems;Organismal Systems;Organismal Systems;Human Diseases;Human Diseases;Environmental Information Processing;Human Diseases;Organismal Systems;Human Diseases;Human Diseases	Cancers;Signaling molecules and interaction;Infectious diseases;Infectious diseases;Infectious diseases;Cell growth and death;Signal transduction;Infectious diseases;Development;Immune system;Immune system;Infectious diseases;Infectious diseases;Signal transduction;Infectious diseases;Immune system;Immune diseases;Infectious diseases	ko05200//Pathways in cancer;ko04060//Cytokine-cytokine receptor interaction;ko05168//Herpes simplex infection;ko05152//Tuberculosis;ko05164//Influenza A;ko04217//Necroptosis;ko04630//Jak-STAT signaling pathway;ko05162//Measles;ko04380//Osteoclast differentiation;ko04650//Natural killer cell mediated cytotoxicity;ko04659//Th17 cell differentiation;ko05142//Chagas disease (American trypanosomiasis)…	K05133;K05133;K05133;K05133;K05133;K05133;K05133;K05133;K05133;K05133;K05133;K05133;K05133;K05133;K05133;K05133;K05133;K05133	-	-	-
LOC100521917	347	405	386	674	630	594	2.75	2.72	2.62	4.07	4.02	4.16	2.69667	4.08333	0.59857	6.3443e-10	2.1143e-08	PTPN14	PREDICTED: tyrosine-protein phosphatase non-receptor type 14 [Orcinus orca]	-	-	-	-	-	-	-
LOC100516296	9	4	5	61	75	32	0.26	0.1	0.13	1.34	1.74	0.81	0.163333	1.29667	2.98892	6.42069e-10	2.13076e-08	EGR3	PREDICTED: early growth response protein 3 isoform X1 [Canis lupus familiaris]	Human Diseases;Human Diseases;Organismal Systems	Cancers;Infectious diseases;Immune system	ko05203//Viral carcinogenesis;ko05161//Hepatitis B;ko04625//C-type lectin receptor signaling pathway	K12497;K12497;K12497	-	-	-
LOC397306	521	643	620	952	935	928	12.34	12.82	12.46	17.12	17.57	19.29	12.54	17.9933	0.520925	6.42903e-10	2.13076e-08	Rxra	PREDICTED: retinoic acid receptor RXR-alpha isoform X1 [Odobenus rosmarus divergens]	Human Diseases;Environmental Information Processing;Human Diseases;Human Diseases;Human Diseases;Human Diseases;Organismal Systems;Organismal Systems;Organismal Systems;Organismal Systems;Human Diseases;Organismal Systems;Organismal Systems;Human Diseases;Human Diseases	Cancers;Signal transduction;Cancers;Endocrine and metabolic diseases;Cancers;Infectious diseases;Endocrine system;Immune system;Endocrine system;Digestive system;Cancers;Endocrine system;Endocrine system;Cancers;Cancers	ko05200//Pathways in cancer;ko04151//PI3K-Akt signaling pathway;ko05202//Transcriptional misregulation in cancers;ko04932//Non-alcoholic fatty liver disease (NAFLD);ko05226//Gastric cancer;ko05160//Hepatitis C;ko04919//Thyroid hormone signaling pathway;ko04659//Th17 cell differentiation;ko04928//Parathyroid hormone synthesis, secretion and action;ko04976//Bile secretion;ko05222//Small cell lung c…	K08524;K08524;K08524;K08524;K08524;K08524;K08524;K08524;K08524;K08524;K08524;K08524;K08524;K08524;K08524	-	-	-
LOC100048943	150	187	180	337	338	336	9.99	10.84	10.31	17.12	18.33	20.2	10.38	18.55	0.837613	6.48742e-10	2.14422e-08	ADSSL1	adenylosuccinate synthetase isozyme 1 [Sus scrofa]	Metabolism;Metabolism;Metabolism	Global and overview maps;Nucleotide metabolism;Amino acid metabolism	ko01100//Metabolic pathways;ko00230//Purine metabolism;ko00250//Alanine, aspartate and glutamate metabolism	K01939;K01939;K01939	-	-	-
LOC110260656	797	908	949	1354	1411	1242	4.33	4.18	4.41	5.6	6.17	5.95	4.30667	5.90667	0.455773	6.57881e-10	2.16849e-08	KMT2D	PREDICTED: LOW QUALITY PROTEIN: histone-lysine N-methyltransferase 2D [Equus caballus]	Human Diseases;Metabolism	Endocrine and metabolic diseases;Amino acid metabolism	ko04934//Cushing syndrome;ko00310//Lysine degradation	K09187;K09187	-	-	-
LOC100153822	604	694	717	597	522	531	32.86	31.76	33.08	24.53	22.67	25.29	32.5667	24.1633	-0.430577	6.68857e-10	2.19866e-08	NFIL3	PREDICTED: nuclear factor interleukin-3-regulated protein [Sus scrofa]	-	-	-	-	-	-	-
LOC100515346	899	1172	1160	1024	928	849	49.51	54.72	54.61	42.94	41.12	41.26	52.9467	41.7733	-0.341958	6.71016e-10	2.19977e-08	ACKR3	PREDICTED: atypical chemokine receptor 3 [Sus scrofa]	Environmental Information Processing	Signaling molecules and interaction	ko04060//Cytokine-cytokine receptor interaction	K04304	GO:0031224//intrinsic component of membrane;GO:0043231//intracellular membrane-bounded organelle	GO:0004950//chemokine receptor activity;GO:0019956//chemokine binding;GO:0038024//cargo receptor activity	GO:0006898//receptor-mediated endocytosis;GO:0019221//cytokine-mediated signaling pathway;GO:0030154//cell differentiation;GO:0043410//positive regulation of MAPK cascade;GO:1902229//regulation of intrinsic apoptotic signaling pathway in response to DNA damage
LOC397429	1028	1083	1213	1035	903	928	67	59.83	67.57	51.35	47.35	53.37	64.8	50.69	-0.354293	7.38308e-10	2.41381e-08	SLC2A2	solute carrier family 2, facilitated glucose transporter member 2 [Sus scrofa]	Human Diseases;Organismal Systems;Organismal Systems;Organismal Systems;Human Diseases;Organismal Systems;Human Diseases;Human Diseases	Endocrine and metabolic diseases;Endocrine system;Endocrine system;Endocrine system;Cancers;Digestive system;Endocrine and metabolic diseases;Endocrine and metabolic diseases	ko04931//Insulin resistance;ko04922//Glucagon signaling pathway;ko04911//Insulin secretion;ko04917//Prolactin signaling pathway;ko05230//Central carbon metabolism in cancer;ko04973//Carbohydrate digestion and absorption;ko04930//Type II diabetes mellitus;ko04950//Maturity onset diabetes of the young	K07593;K07593;K07593;K07593;K07593;K07593;K07593;K07593	-	-	-
LOC100174961	825	1011	1085	886	838	783	24.09	25.02	27.08	19.69	19.69	20.18	25.3967	19.8533	-0.355258	8.07494e-10	2.63287e-08	KLF6	Krueppel-like factor 6 [Sus scrofa]	-	-	-	-	-	-	-
LOC100627201	221	261	221	167	153	108	4.1	4.11	3.52	2.36	2.3	1.77	3.91	2.14333	-0.867312	8.65729e-10	2.80176e-08	SLC2A6	PREDICTED: solute carrier family 2, facilitated glucose transporter member 6 isoform X1 [Sus scrofa]	-	-	-	-	-	-	-
LOC100155147	534	638	641	540	481	448	23.17	23.46	23.76	17.83	16.79	17.15	23.4633	17.2567	-0.443254	8.7896e-10	2.83523e-08	PIK3IP1	PREDICTED: phosphoinositide-3-kinase-interacting protein 1 isoform X1 [Sus scrofa]	-	-	-	-	-	-	-
LOC100523979	252	314	302	222	185	186	10.77	11.39	11.04	7.23	6.36	7.06	11.0667	6.88333	-0.685041	1.10555e-09	3.54902e-08	CCNG2	PREDICTED: cyclin-G2 isoform X1 [Sus scrofa]	Environmental Information Processing;Cellular Processes	Signal transduction;Cell growth and death	ko04068//FoxO signaling pathway;ko04115//p53 signaling pathway	K10146;K10146	-	-	-
LOC100153977	169	158	159	102	85	79	3.85	3.05	3.1	1.77	1.56	1.59	3.33333	1.64	-1.02327	1.10613e-09	3.54902e-08	GCLM	PREDICTED: glutamate--cysteine ligase regulatory subunit [Sus scrofa]	Metabolism;Metabolism;Metabolism;Cellular Processes	Global and overview maps;Metabolism of other amino acids;Amino acid metabolism;Cell growth and death	ko01100//Metabolic pathways;ko00480//Glutathione metabolism;ko00270//Cysteine and methionine metabolism;ko04216//Ferroptosis	K11205;K11205;K11205;K11205	-	-	-
LOC100738137	358	431	377	669	664	620	9.04	9.23	8.12	12.89	13.51	13.8	8.79667	13.4	0.607204	1.11543e-09	3.56936e-08	ANO1	PREDICTED: anoctamin-1 isoform X1 [Bos indicus]	-	-	-	-	-	-	-
LOC100515079	1662	1900	1829	1827	1667	1356	29.64	28.41	27.12	24.46	23.53	21.19	28.39	23.06	-0.29999	1.12347e-09	3.58559e-08	IQGAP3	PREDICTED: ras GTPase-activating-like protein IQGAP3 [Sus scrofa]	Cellular Processes	Cell motility	ko04810//Regulation of actin cytoskeleton	K05767	GO:0030054//cell junction;GO:0044424//intracellular part;GO:0044459//plasma membrane part	GO:0017016//Ras GTPase binding;GO:0032027//myosin light chain binding	GO:0000165//MAPK cascade;GO:0007264//small GTPase mediated signal transduction;GO:0010033//response to organic substance;GO:0010468//regulation of gene expression;GO:0032147//activation of protein kinase activity;GO:0032535//regulation of cellular component size;GO:0033599//regulation of mammary gland epithelial cell proliferation
LOC100157844	1027	1227	1242	1088	1048	985	43.34	43.9	44.8	34.96	35.58	36.68	44.0133	35.74	-0.300401	1.26091e-09	4.00305e-08	PIM1	PREDICTED: serine/threonine-protein kinase pim-1 [Rhinopithecus roxellana]	Human Diseases;Environmental Information Processing;Human Diseases;Human Diseases;Human Diseases	Cancers;Signal transduction;Cancers;Endocrine and metabolic diseases;Cancers	ko05200//Pathways in cancer;ko04630//Jak-STAT signaling pathway;ko05206//MicroRNAs in cancer;ko04933//AGE-RAGE signaling pathway in diabetic complications;ko05221//Acute myeloid leukemia	K04702;K04702;K04702;K04702;K04702	-	-	-
LOC100233174	320	400	349	652	636	533	19.62	20.79	18.29	30.44	31.38	28.84	19.5667	30.22	0.627106	1.326e-09	4.19866e-08	CPNE1	copine-1 [Sus scrofa]	-	-	-	-	-	-	-
LOC110260417	911	1016	1064	1573	1455	1351	19.53	18.47	19.5	25.67	25.1	25.56	19.1667	25.4433	0.408688	1.50332e-09	4.73526e-08	Scrib	PREDICTED: LOW QUALITY PROTEIN: protein scribble homolog [Camelus bactrianus]	Human Diseases;Human Diseases;Cellular Processes;Environmental Information Processing	Infectious diseases;Cancers;Cellular community - eukaryotes;Signal transduction	ko05165//Human papillomavirus infection;ko05203//Viral carcinogenesis;ko04530//Tight junction;ko04390//Hippo signaling pathway	K16175;K16175;K16175;K16175	-	-	-
LOC100736589	1015	1211	1187	1795	1644	1492	12.36	12.5	12.35	16.64	16.1	16.03	12.4033	16.2567	0.390304	1.51211e-09	4.75054e-08	KIAA0930	PREDICTED: uncharacterized protein KIAA0930 homolog isoform X1 [Sus scrofa]	-	-	-	-	-	-	-
LOC102165618	936	1119	1167	990	983	859	29.75	30.15	31.7	23.95	25.14	24.09	30.5333	24.3933	-0.323898	1.57026e-09	4.90769e-08	GNG2	PREDICTED: guanine nucleotide-binding protein G(I)/G(S)/G(O) subunit gamma-2 [Equus przewalskii]	Human Diseases;Environmental Information Processing;Human Diseases;Environmental Information Processing;Human Diseases;Organismal Systems;Human Diseases;Organismal Systems;Environmental Information Processing;Organismal Systems;Organismal Systems;Organismal Systems;Organismal Systems;Organismal Systems;Organismal Systems;Organismal Systems;Human Diseases	Cancers;Signal transduction;Infectious diseases;Signal transduction;Infectious diseases;Immune system;Substance dependence;Nervous system;Signal transduction;Endocrine system;Nervous system;Nervous system;Nervous system;Nervous system;Environmental adaptation;Nervous system;Substance dependence	ko05200//Pathways in cancer;ko04151//PI3K-Akt signaling pathway;ko05163//Human cytomegalovirus infection;ko04014//Ras signaling pathway;ko05167//Kaposi sarcoma-associated herpesvirus infection;ko04062//Chemokine signaling pathway;ko05034//Alcoholism;ko04723//Retrograde endocannabinoid signaling;ko04371//Apelin signaling pathway;ko04926//Relaxin signaling pathway;ko04728//Dopaminergic synapse;ko04…	K07826;K07826;K07826;K07826;K07826;K07826;K07826;K07826;K07826;K07826;K07826;K07826;K07826;K07826;K07826;K07826;K07826	-	-	-
LOC100738351	149	221	182	380	360	326	3.31	4.22	3.48	6.61	6.76	6.66	3.67	6.67667	0.863348	1.57547e-09	4.91123e-08	MAPT	PREDICTED: microtubule-associated protein tau isoform X1 [Balaenoptera acutorostrata scammoni]	Environmental Information Processing;Human Diseases	Signal transduction;Neurodegenerative diseases	ko04010//MAPK signaling pathway;ko05010//Alzheimer disease	K04380;K04380	-	-	-
LOC397591	284	329	307	620	499	489	7.54	7.4	6.96	12.52	10.65	11.45	7.3	11.54	0.660675	1.67536e-09	5.19576e-08	NPC1	PREDICTED: Niemann-Pick C1 protein isoform X1 [Sus scrofa]	Cellular Processes;Organismal Systems	Transport and catabolism;Digestive system	ko04142//Lysosome;ko04979//Cholesterol metabolism	K12385;K12385	-	-	-
LOC100579176	379	423	442	779	678	599	17.86	16.9	17.8	27.95	25.71	24.91	17.52	26.19	0.580013	1.83731e-09	5.6834e-08	SLC19A1	PREDICTED: folate transporter 1 isoform X1 [Sus scrofa]	Human Diseases;Organismal Systems	Drug resistance;Digestive system	ko01523//Antifolate resistance;ko04977//Vitamin digestion and absorption	K14609;K14609	-	-	-
LOC100525303	1051	1320	1276	1828	1871	1607	45.11	48.07	46.85	59.74	64.66	60.85	46.6767	61.75	0.403738	2.12449e-09	6.5216e-08	ALDH3A2	PREDICTED: fatty aldehyde dehydrogenase isoform X1 [Sus scrofa]	Metabolism;Metabolism;Metabolism;Metabolism;Metabolism;Metabolism;Metabolism;Metabolism;Metabolism;Metabolism;Metabolism;Metabolism	Global and overview maps;Lipid metabolism;Carbohydrate metabolism;Amino acid metabolism;Amino acid metabolism;Amino acid metabolism;Lipid metabolism;Amino acid metabolism;Carbohydrate metabolism;Metabolism of other amino acids;Amino acid metabolism;Carbohydrate metabolism	ko01100//Metabolic pathways;ko00561//Glycerolipid metabolism;ko00010//Glycolysis / Gluconeogenesis;ko00310//Lysine degradation;ko00280//Valine, leucine and isoleucine degradation;ko00330//Arginine and proline metabolism;ko00071//Fatty acid degradation;ko00380//Tryptophan metabolism;ko00620//Pyruvate metabolism;ko00410//beta-Alanine metabolism;ko00340//Histidine metabolism;ko00053//Ascorbate and a…	K00128;K00128;K00128;K00128;K00128;K00128;K00128;K00128;K00128;K00128;K00128;K00128	-	-	-
LOC100156588	1170	1401	1380	1960	1930	1737	20.97	21.28	21.14	26.74	27.89	27.46	21.13	27.3633	0.372951	2.18897e-09	6.70247e-08	Cdc42bpb	PREDICTED: serine/threonine-protein kinase MRCK beta [Sus scrofa]	-	-	-	-	-	-	-
LOC100157601	953	1164	1178	1062	988	873	33.08	34.25	34.94	28.06	27.59	26.74	34.09	27.4633	-0.311842	2.22399e-09	6.79247e-08	Tysnd1	PREDICTED: peroxisomal leader peptide-processing protease [Sus scrofa]	-	-	-	-	-	-	-
LOC100620673	873	1058	1032	1551	1449	1320	31.09	31.94	31.41	42.05	41.52	41.48	31.48	41.6833	0.405035	2.46546e-09	7.51095e-08	RHPN2	PREDICTED: rhophilin-2 [Balaenoptera acutorostrata scammoni]	-	-	-	-	-	-	-
LOC100515063	264	322	316	209	195	217	8.04	8.25	8.22	4.87	4.79	5.79	8.17	5.15	-0.665764	2.57337e-09	7.81994e-08	HMMR	PREDICTED: hyaluronan mediated motility receptor isoform X1 [Sus scrofa]	Environmental Information Processing	Signaling molecules and interaction	ko04512//ECM-receptor interaction	K06267	-	-	-
LOC100511401	237	304	252	548	452	426	3.69	4.01	3.35	6.49	5.66	5.85	3.68333	6	0.703951	3.02359e-09	9.16496e-08	TBC1D16	PREDICTED: TBC1 domain family member 16 isoform X1 [Sus scrofa]	-	-	-	-	-	-	-
LOC100153196	281	296	360	219	196	223	14.53	12.98	15.91	8.62	8.16	10.18	14.4733	8.98667	-0.687539	3.28548e-09	9.90901e-08	STX7	PREDICTED: syntaxin-7 [Sus scrofa]	Cellular Processes;Genetic Information Processing	Transport and catabolism;Folding, sorting and degradation	ko04145//Phagosome;ko04130//SNARE interactions in vesicular transport	K08488;K08488	-	-	-
LOC100739641	2032	2578	2317	3493	3264	2887	59.7	64.21	58.19	78.13	77.16	74.86	60.7	76.7167	0.337844	3.40495e-09	1.02182e-07	Fam129b	PREDICTED: niban-like protein 1 [Sus scrofa]	-	-	-	-	-	-	-
LOC100514413	985	1226	1204	1084	1056	886	14.9	15.73	15.57	12.49	12.86	11.83	15.4	12.3933	-0.313366	3.53275e-09	1.05755e-07	GTPBP2	PREDICTED: GTP-binding protein 2 isoform X1 [Sus scrofa]	-	-	-	-	GO:0043227//membrane-bounded organelle	GO:0017111//nucleoside-triphosphatase activity;GO:0032550//purine ribonucleoside binding	-
LOC100514741	1633	1890	1840	2601	2646	2284	26.84	26.31	25.88	32.57	35.02	33.21	26.3433	33.6	0.351023	3.9725e-09	1.1804e-07	AFDN	PREDICTED: afadin isoform X1 [Sus scrofa]	Environmental Information Processing;Environmental Information Processing;Environmental Information Processing;Cellular Processes;Organismal Systems;Cellular Processes	Signal transduction;Signal transduction;Signal transduction;Cellular community - eukaryotes;Immune system;Cellular community - eukaryotes	ko04014//Ras signaling pathway;ko04015//Rap1 signaling pathway;ko04024//cAMP signaling pathway;ko04530//Tight junction;ko04670//Leukocyte transendothelial migration;ko04520//Adherens junction	K05702;K05702;K05702;K05702;K05702;K05702	-	-	-
LOC100513746	130	140	144	86	78	54	5.26	4.83	5.01	2.67	2.56	1.94	5.03333	2.39	-1.0745	3.99936e-09	1.18546e-07	Noct	PREDICTED: nocturnin isoform X3 [Felis catus]	-	-	-	-	GO:0036464//cytoplasmic ribonucleoprotein granule;GO:0043231//intracellular membrane-bounded organelle	GO:0000175//3'-5'-exoribonuclease activity;GO:0044822//poly(A) RNA binding	GO:0001649//osteoblast differentiation;GO:0002237//response to molecule of bacterial origin;GO:0007623//circadian rhythm;GO:0022618//ribonucleoprotein complex assembly;GO:0043488//regulation of mRNA stability;GO:0045597//positive regulation of cell differentiation;GO:0090501//RNA phosphodiester bond hydrolysis;GO:2000026//regulation of multicellular organismal development
LOC100155201	914	1037	1065	870	903	852	82.06	78.93	81.72	59.46	65.23	67.5	80.9033	64.0633	-0.3367	4.08817e-09	1.20586e-07	PPA1	PREDICTED: inorganic pyrophosphatase [Sus scrofa]	Metabolism	Energy metabolism	ko00190//Oxidative phosphorylation	K01507	-	-	-
LOC100517534	1296	1542	1597	1358	1352	1317	81.8	82.51	86.16	65.26	68.66	73.36	83.49	69.0933	-0.273057	4.66641e-09	1.36972e-07	TXNDC12	PREDICTED: thioredoxin domain-containing protein 12 [Physeter catodon]	Metabolism	Metabolism of other amino acids	ko00480//Glutathione metabolism	K05360	-	-	-
LOC100152732	50	64	68	168	131	176	3.06	3.32	3.55	7.82	6.44	9.49	3.31	7.91667	1.25806	4.7381e-09	1.38739e-07	GPATCH4	G patch domain-containing protein 4 [Sus scrofa]	-	-	-	-	-	-	-
LOC595103	473	549	540	470	362	393	32.7	32.81	31.86	25.36	19.73	23.76	32.4567	22.95	-0.500021	5.00665e-09	1.46247e-07	PLIN3	47 kDa tail interaction protein [Sus scrofa]	-	-	-	-	-	-	-
LOC100626649	659	791	746	700	591	560	14.18	14.64	13.98	11.71	10.58	10.8	14.2667	11.03	-0.371216	5.24715e-09	1.52903e-07	KANK1	PREDICTED: KN motif and ankyrin repeat domain-containing protein 1 isoform X1 [Equus asinus]	-	-	-	-	-	-	-
LOC100627336	256	298	321	526	528	451	9.3	9.18	9.97	14.54	15.43	14.51	9.48333	14.8267	0.644728	5.35106e-09	1.55358e-07	EPS8L1	PREDICTED: LOW QUALITY PROTEIN: epidermal growth factor receptor kinase substrate 8-like protein 1 [Sus scrofa]	-	-	-	-	-	-	-
LOC100622217	216	240	224	156	158	128	8.92	8.55	8.37	5.03	5.53	4.75	8.61333	5.10333	-0.755132	5.35719e-09	1.55358e-07	MAP3K8	PREDICTED: mitogen-activated protein kinase kinase kinase 8 [Sus scrofa]	Environmental Information Processing;Organismal Systems;Environmental Information Processing;Organismal Systems	Signal transduction;Immune system;Signal transduction;Immune system	ko04010//MAPK signaling pathway;ko04620//Toll-like receptor signaling pathway;ko04668//TNF signaling pathway;ko04660//T cell receptor signaling pathway	K04415;K04415;K04415;K04415	-	-	-
LOC396735	639	858	759	624	669	557	68.95	76.53	65.49	49.64	57.01	48.51	70.3233	51.72	-0.443281	5.67167e-09	1.64084e-07	CXCL16	PREDICTED: C-X-C motif chemokine 16 isoform X2 [Sus scrofa]	Environmental Information Processing;Organismal Systems	Signaling molecules and interaction;Immune system	ko04060//Cytokine-cytokine receptor interaction;ko04062//Chemokine signaling pathway	K10035;K10035	-	-	-
LOC396975	598	764	757	611	626	527	57.37	62.13	62.07	44.62	48.32	44.61	60.5233	45.85	-0.40057	6.72465e-09	1.93158e-07	PSMB8	proteasome subunit beta type-8 [Sus scrofa]	Genetic Information Processing	Folding, sorting and degradation	ko03050//Proteasome	K02740	-	-	-
LOC100624728	1038	1187	1312	1177	1026	951	57.69	55.92	62.32	49.8	45.88	46.64	58.6433	47.44	-0.305863	7.90728e-09	2.26588e-07	TSPAN13	PREDICTED: tetraspanin-13 [Sus scrofa]	-	-	-	-	-	-	-
LOC100153166	234	262	269	480	442	410	11.67	11.08	11.47	18.23	17.74	18.05	11.4067	18.0067	0.658654	8.12802e-09	2.31812e-07	SLC29A3	PREDICTED: equilibrative nucleoside transporter 3 [Sus scrofa]	Human Diseases	Substance dependence	ko05034//Alcoholism	K15014	-	-	-
LOC100240743	259	281	284	235	150	154	32.41	29.81	30.38	22.39	15.1	17.01	30.8667	18.1667	-0.764756	8.34978e-09	2.37575e-07	DDIT3	DNA damage-inducible transcript 3 protein [Sus scrofa]	Environmental Information Processing;Human Diseases;Genetic Information Processing;Human Diseases;Cellular Processes	Signal transduction;Cancers;Folding, sorting and degradation;Endocrine and metabolic diseases;Cell growth and death	ko04010//MAPK signaling pathway;ko05202//Transcriptional misregulation in cancers;ko04141//Protein processing in endoplasmic reticulum;ko04932//Non-alcoholic fatty liver disease (NAFLD);ko04210//Apoptosis	K04452;K04452;K04452;K04452;K04452	-	-	-
LOC100152351	1079	1255	1163	1800	1716	1522	31.33	30.72	28.67	39.72	39.88	38.89	30.24	39.4967	0.385273	8.69641e-09	2.46656e-07	SULF2	PREDICTED: extracellular sulfatase Sulf-2 [Sus scrofa]	-	-	-	-	-	-	-
LOC102158247	331	406	328	606	635	572	12.21	12.46	10.2	16.65	18.62	18.01	11.6233	17.76	0.611608	8.70983e-09	2.46656e-07	VASN	PREDICTED: vasorin isoform X1 [Sus scrofa]	-	-	-	-	-	-	-
LOC100154191	723	852	816	1284	1248	1047	22.69	22.67	21.89	30.67	31.51	28.99	22.4167	30.39	0.439025	9.82985e-09	2.75785e-07	TRIM8	probable E3 ubiquitin-protein ligase TRIM8 [Bos taurus]	-	-	-	-	-	-	-
LOC100517189	1340	1579	1491	2198	2040	1932	41.61	42.49	40.41	53.53	49.04	49.59	41.5033	50.72	0.289328	1.18777e-08	3.30168e-07	CTDSPL	PREDICTED: CTD small phosphatase-like protein isoform X1 [Sus scrofa]	-	-	-	-	-	-	-
LOC100625122	725	819	751	1210	1153	1079	53.11	64.5	53.23	71.84	72.55	73.14	56.9467	72.51	0.348569	1.31826e-08	3.65597e-07	ARFRP1	PREDICTED: ADP-ribosylation factor-related protein 1 isoform X6 [Felis catus]	-	-	-	-	-	-	-
LOC100153830	173	235	231	134	132	140	2.58	2.97	2.94	1.52	1.58	1.84	2.83	1.64667	-0.781254	1.33498e-08	3.69385e-07	MALT1	PREDICTED: mucosa-associated lymphoid tissue lymphoma translocation protein 1 isoform X1 [Tursiops truncatus]	Human Diseases;Environmental Information Processing;Organismal Systems;Organismal Systems;Organismal Systems	Infectious diseases;Signal transduction;Immune system;Immune system;Immune system	ko05152//Tuberculosis;ko04064//NF-kappa B signaling pathway;ko04625//C-type lectin receptor signaling pathway;ko04660//T cell receptor signaling pathway;ko04662//B cell receptor signaling pathway	K07369;K07369;K07369;K07369;K07369	-	-	-
LOC100126236	735	880	820	758	698	659	91.4	92.76	87.15	71.76	69.83	72.32	90.4367	71.3033	-0.342938	1.37346e-08	3.79162e-07	STC2	stanniocalcin-2 precursor [Sus scrofa]	-	-	-	-	-	-	-
LOC100623926	999	1159	1094	1079	951	890	25.64	25.21	24	21.08	19.63	20.14	24.95	20.2833	-0.298745	1.39687e-08	3.84746e-07	PRRG1	PREDICTED: transmembrane gamma-carboxyglutamic acid protein 1 [Sus scrofa]	-	-	-	-	-	-	-
LOC397382	1369	1795	1602	2479	2349	1992	61.61	67.77	61.01	84.07	84.47	78.32	63.4633	82.2867	0.374735	1.56012e-08	4.27756e-07	MUC1	PREDICTED: mucin-1 isoform X1 [Sus scrofa]	-	-	-	-	-	-	-
LOC397566	837	974	968	901	806	761	39.36	38.47	38.74	31.94	30.34	31.29	38.8567	31.19	-0.317079	1.56587e-08	4.2836e-07	PGM1	PREDICTED: phosphoglucomutase-1 isoform X1 [Sus scrofa]	Metabolism;Metabolism;Metabolism;Metabolism;Metabolism;Metabolism;Metabolism	Global and overview maps;Nucleotide metabolism;Carbohydrate metabolism;Carbohydrate metabolism;Carbohydrate metabolism;Carbohydrate metabolism;Carbohydrate metabolism	ko01100//Metabolic pathways;ko00230//Purine metabolism;ko00010//Glycolysis / Gluconeogenesis;ko00520//Amino sugar and nucleotide sugar metabolism;ko00500//Starch and sucrose metabolism;ko00052//Galactose metabolism;ko00030//Pentose phosphate pathway	K01835;K01835;K01835;K01835;K01835;K01835;K01835	-	-	-
LOC100519215	853	1056	1047	1564	1403	1305	14.89	15.63	15.62	20.78	19.7	20.1	15.38	20.1933	0.392824	1.72489e-08	4.69732e-07	Rbm15	PREDICTED: putative RNA-binding protein 15B [Sus scrofa]	-	-	-	-	-	-	-
LOC100379630	110	138	136	71	63	72	11.82	12.57	12.49	5.81	5.45	6.83	12.2933	6.03	-1.02765	1.80772e-08	4.90075e-07	GDF15	growth/differentiation factor 15 precursor [Sus scrofa]	Environmental Information Processing	Signaling molecules and interaction	ko04060//Cytokine-cytokine receptor interaction	K05504	-	-	-
LOC100523638	485	638	587	501	473	425	10.7	12.06	11.16	8.47	8.46	8.25	11.3067	8.39333	-0.429858	1.82907e-08	4.94752e-07	TRPV2	transient receptor potential cation channel subfamily V member 2 isoform X1 [Castor canadensis]	Organismal Systems;Organismal Systems	Immune system;Sensory system	ko04621//NOD-like receptor signaling pathway;ko04750//Inflammatory mediator regulation of TRP channels	K04971;K04971	-	-	-
LOC100525282	729	842	795	723	702	624	56.53	57.13	52.77	43.48	45.43	42.91	55.4767	43.94	-0.336346	1.83807e-08	4.96073e-07	ROGDI	PREDICTED: protein rogdi homolog [Lipotes vexillifer]	-	-	-	-	-	-	-
LOC100513992	387	520	463	384	375	301	16.15	17.89	16.46	11.54	11.95	10.53	16.8333	11.34	-0.5699	1.88993e-08	5.0893e-07	GALNT16	PREDICTED: polypeptide N-acetylgalactosaminyltransferase 16 isoform X1 [Sus scrofa]	Metabolism;Metabolism	Global and overview maps;Glycan biosynthesis and metabolism	ko01100//Metabolic pathways;ko00512//Mucin type O-glycan biosynthesis	K00710;K00710	GO:0031224//intrinsic component of membrane;GO:0031988//membrane-bounded vesicle;GO:0043231//intracellular membrane-bounded organelle	GO:0005488//binding;GO:0016740//transferase activity	GO:0006464//cellular protein modification process
LOC664652	542	582	641	1029	831	932	14.51	13.03	14.37	20.69	17.64	21.5	13.97	19.9433	0.513575	1.90839e-08	5.12757e-07	OGT	PREDICTED: UDP-N-acetylglucosamine--peptide N-acetylglucosaminyltransferase 110 kDa subunit isoform X1 [Equus caballus]	Human Diseases;Metabolism	Endocrine and metabolic diseases;Glycan biosynthesis and metabolism	ko04931//Insulin resistance;ko00514//Other types of O-glycan biosynthesis	K09667;K09667	-	-	-
LOC100521473	560	624	593	1090	914	798	9.09	8.58	8.23	13.47	11.93	11.43	8.63333	12.2767	0.507929	1.9902e-08	5.33551e-07	Dusp7	PREDICTED: dual specificity protein phosphatase 7 [Orcinus orca]	Environmental Information Processing	Signal transduction	ko04010//MAPK signaling pathway	K04459	-	-	-
LOC641309	349	459	408	705	640	615	10.03	11.32	10.31	15.32	14.88	16.11	10.5533	15.4367	0.548663	2.05703e-08	5.49026e-07	PKD2	polycystin-2 [Sus scrofa]	-	-	-	-	-	-	-
LOC397454	708	795	849	776	603	610	8.46	8.06	8.68	7.06	5.8	6.43	8.4	6.43	-0.385571	2.06641e-08	5.50312e-07	Itpr1	PREDICTED: inositol 1,4,5-trisphosphate receptor type 1 isoform X3 [Camelus ferus]	Human Diseases;Human Diseases;Human Diseases;Human Diseases;Environmental Information Processing;Human Diseases;Organismal Systems;Environmental Information Processing;Cellular Processes;Human Diseases;Organismal Systems;Organismal Systems;Cellular Processes;Environmental Information Processing;Organismal Systems;Organismal Systems;Cellular Processes;Organismal Systems;Organismal Systems;Organism…	Infectious diseases;Neurodegenerative diseases;Infectious diseases;Cancers;Signal transduction;Neurodegenerative diseases;Immune system;Signal transduction;Cell growth and death;Endocrine and metabolic diseases;Nervous system;Endocrine system;Cell growth and death;Signal transduction;Circulatory system;Endocrine system;Transport and catabolism;Nervous system;Immune system;Nervous system;Cell grow…	ko05163//Human cytomegalovirus infection;ko05016//Huntington disease;ko05167//Kaposi sarcoma-associated herpesvirus infection;ko05205//Proteoglycans in cancer;ko04020//Calcium signaling pathway;ko05010//Alzheimer disease;ko04621//NOD-like receptor signaling pathway;ko04022//cGMP - PKG signaling pathway;ko04218//Cellular senescence;ko04934//Cushing syndrome;ko04723//Retrograde endocannabinoid sign…	K04958;K04958;K04958;K04958;K04958;K04958;K04958;K04958;K04958;K04958;K04958;K04958;K04958;K04958;K04958;K04958;K04958;K04958;K04958;K04958;K04958;K04958;K04958;K04958;K04958;K04958;K04958;K04958;K04958;K04958;K04958;K04958;K04958;K04958;K04958;K04958;K04958;K04958;K04958;K04958	-	-	-
LOC100154343	459	568	606	943	895	731	9.66	10	11.05	14.86	15.13	13.33	10.2367	14.44	0.496325	2.25235e-08	5.95884e-07	Ablim1	PREDICTED: actin-binding LIM protein 1 isoform X3 [Sus scrofa]	Organismal Systems	Development	ko04360//Axon guidance	K07520	-	-	-
LOC100518554	646	759	786	696	638	532	43.92	43.75	45.68	36.03	34.9	31.92	44.45	34.2833	-0.374676	2.4565e-08	6.48474e-07	INHBE	PREDICTED: inhibin beta E chain [Sus scrofa]	Environmental Information Processing;Cellular Processes;Environmental Information Processing	Signaling molecules and interaction;Cellular community - eukaryotes;Signal transduction	ko04060//Cytokine-cytokine receptor interaction;ko04550//Signaling pathways regulating pluripotency of stem cells;ko04350//TGF-beta signaling pathway	K22689;K22689;K22689	-	-	-
LOC100513827	559	587	561	1034	842	822	15.93	14.18	13.66	22.43	19.3	20.67	14.59	20.8	0.511604	2.5332e-08	6.65439e-07	WWC1	PREDICTED: protein KIBRA isoform X2 [Ovis aries musimon]	Environmental Information Processing;Environmental Information Processing	Signal transduction;Signal transduction	ko04390//Hippo signaling pathway;ko04392//Hippo signaling pathway - multiple species	K16685;K16685	GO:0031253//cell projection membrane;GO:0032991//macromolecular complex;GO:0043231//intracellular membrane-bounded organelle;GO:0044444//cytoplasmic part	GO:0003712//transcription cofactor activity;GO:0019899//enzyme binding	GO:0007163//establishment or maintenance of cell polarity;GO:0010468//regulation of gene expression;GO:0034645//cellular macromolecule biosynthetic process;GO:0035330//regulation of hippo signaling;GO:0042327//positive regulation of phosphorylation;GO:0045926//negative regulation of growth;GO:0048870//cell motility;GO:0051049//regulation of transport
LOC100155813	446	555	599	433	455	393	43.44	46.25	50.02	32.39	35.82	33.82	46.57	34.01	-0.453442	2.53732e-08	6.65439e-07	TMEM70	PREDICTED: transmembrane protein 70, mitochondrial isoform X1 [Sus scrofa]	-	-	-	-	-	-	-
LOC100152609	1228	1594	1477	2130	2011	1900	72.25	79.6	74.26	95.49	95.47	98.9	75.37	96.62	0.358331	2.60817e-08	6.82538e-07	MTCH1	PREDICTED: LOW QUALITY PROTEIN: mitochondrial carrier homolog 1 [Orcinus orca]	-	-	-	-	-	-	-
LOC100511331	732	873	728	685	681	594	60.83	61.5	51.71	43.34	45.54	43.56	58.0133	44.1467	-0.39408	2.82437e-08	7.37515e-07	AKR7A2	aflatoxin B1 aldehyde reductase member 2 [Sus scrofa]	Metabolism	Xenobiotics biodegradation and metabolism	ko00980//Metabolism of xenobiotics by cytochrome P450	K15303	-	-	-
LOC449528	3697	4198	4168	5506	5504	4982	78.71	75.68	75.82	89.01	94.04	93.31	76.7367	92.12	0.263598	2.87248e-08	7.48459e-07	EIF4G1	PREDICTED: eukaryotic translation initiation factor 4 gamma 1 isoform X4 [Sus scrofa]	Genetic Information Processing;Human Diseases	Translation;Cardiovascular diseases	ko03013//RNA transport;ko05416//Viral myocarditis	K03260;K03260	-	-	-
LOC100512773	3355	3851	3616	5265	4826	4389	59.16	57.56	54.5	70.68	68.47	68.3	57.0733	69.15	0.276912	2.89e-08	7.51401e-07	PPL	PREDICTED: periplakin isoform X1 [Sus scrofa]	-	-	-	-	-	-	-
LOC100622787	1051	1234	1288	1173	1106	992	27.58	27.45	28.89	23.44	23.35	22.98	27.9733	23.2567	-0.266408	3.056e-08	7.89457e-07	CLIC4	chloride intracellular channel protein 4 [Bos taurus]	-	-	-	-	-	-	-
LOC100156226	455	474	468	783	746	681	5.49	4.85	4.82	7.19	7.24	7.25	5.05333	7.22667	0.516095	3.15409e-08	8.11321e-07	EP300	PREDICTED: histone acetyltransferase p300 [Sus scrofa]	Human Diseases;Human Diseases;Human Diseases;Human Diseases;Human Diseases;Environmental Information Processing;Human Diseases;Human Diseases;Human Diseases;Human Diseases;Human Diseases;Environmental Information Processing;Human Diseases;Human Diseases;Environmental Information Processing;Environmental Information Processing;Cellular Processes;Organismal Systems;Human Diseases;Environmental Info…	Cancers;Infectious diseases;Infectious diseases;Infectious diseases;Infectious diseases;Signal transduction;Neurodegenerative diseases;Infectious diseases;Infectious diseases;Infectious diseases;Cancers;Signal transduction;Cancers;Infectious diseases;Signal transduction;Signal transduction;Cell growth and death;Endocrine system;Cancers;Signal transduction;Endocrine system;Endocrine system;Signal …	ko05200//Pathways in cancer;ko05165//Human papillomavirus infection;ko05166//HTLV-I infection;ko05168//Herpes simplex infection;ko05169//Epstein-Barr virus infection;ko04024//cAMP signaling pathway;ko05016//Huntington disease;ko05167//Kaposi sarcoma-associated herpesvirus infection;ko05152//Tuberculosis;ko05164//Influenza A;ko05203//Viral carcinogenesis;ko04630//Jak-STAT signaling pathway;ko05206…	K04498;K04498;K04498;K04498;K04498;K04498;K04498;K04498;K04498;K04498;K04498;K04498;K04498;K04498;K04498;K04498;K04498;K04498;K04498;K04498;K04498;K04498;K04498;K04498;K04498;K04498;K04498	-	-	-
LOC100517568	763	863	887	805	670	708	29.89	28.66	29.7	24.01	21.12	24.48	29.4167	23.2033	-0.342302	3.31869e-08	8.51845e-07	MAGT1	PREDICTED: magnesium transporter protein 1 [Sus scrofa]	-	-	-	-	-	-	-
LOC100511571	197	206	202	377	383	334	17.29	15.52	15.43	25.35	27.39	25.89	16.08	26.21	0.70485	3.5554e-08	9.08737e-07	TSPAN1	PREDICTED: tetraspanin-1 isoform X1 [Sus scrofa]	-	-	-	-	-	-	-
LOC100516641	1311	1720	1738	2398	2400	2002	35.15	38.91	39.57	49.03	51.79	47.2	37.8767	49.34	0.381448	3.65496e-08	9.32208e-07	ERBB2	PREDICTED: receptor tyrosine-protein kinase erbB-2 [Camelus ferus]	Human Diseases;Environmental Information Processing;Environmental Information Processing;Human Diseases;Cellular Processes;Environmental Information Processing;Cellular Processes;Human Diseases;Human Diseases;Human Diseases;Human Diseases;Environmental Information Processing;Human Diseases;Environmental Information Processing;Human Diseases;Human Diseases;Human Diseases;Cellular Processes;Human D…	Cancers;Signal transduction;Signal transduction;Cancers;Cellular community - eukaryotes;Signal transduction;Cellular community - eukaryotes;Cancers;Cancers;Cancers;Cancers;Signal transduction;Drug resistance;Signal transduction;Drug resistance;Drug resistance;Cancers;Cellular community - eukaryotes;Cancers;Cancers;Cancers;Cancers	ko05200//Pathways in cancer;ko04151//PI3K-Akt signaling pathway;ko04010//MAPK signaling pathway;ko05205//Proteoglycans in cancer;ko04510//Focal adhesion;ko04020//Calcium signaling pathway;ko04530//Tight junction;ko05206//MicroRNAs in cancer;ko05226//Gastric cancer;ko05224//Breast cancer;ko05215//Prostate cancer;ko04066//HIF-1 signaling pathway;ko01522//Endocrine resistance;ko04012//ErbB signaling…	K05083;K05083;K05083;K05083;K05083;K05083;K05083;K05083;K05083;K05083;K05083;K05083;K05083;K05083;K05083;K05083;K05083;K05083;K05083;K05083;K05083;K05083	-	-	-
LOC100517196	395	432	488	333	357	331	28.67	26.58	30.27	18.4	20.85	21.2	28.5067	20.15	-0.50052	3.70926e-08	9.43138e-07	SLC25A4	PREDICTED: ADP/ATP translocase 1 [Sus scrofa]	Human Diseases;Human Diseases;Environmental Information Processing;Human Diseases;Cellular Processes;Environmental Information Processing;Cellular Processes;Human Diseases	Infectious diseases;Neurodegenerative diseases;Signal transduction;Infectious diseases;Cell growth and death;Signal transduction;Cell growth and death;Neurodegenerative diseases	ko05166//HTLV-I infection;ko05016//Huntington disease;ko04020//Calcium signaling pathway;ko05164//Influenza A;ko04217//Necroptosis;ko04022//cGMP - PKG signaling pathway;ko04218//Cellular senescence;ko05012//Parkinson disease	K05863;K05863;K05863;K05863;K05863;K05863;K05863;K05863	-	-	-
LOC100521514	894	1131	993	888	944	797	78.27	83.94	74.31	59.19	66.5	61.58	78.84	62.4233	-0.336842	3.71345e-08	9.43138e-07	GALK1	PREDICTED: galactokinase [Sus scrofa]	Metabolism;Metabolism;Metabolism	Global and overview maps;Carbohydrate metabolism;Carbohydrate metabolism	ko01100//Metabolic pathways;ko00520//Amino sugar and nucleotide sugar metabolism;ko00052//Galactose metabolism	K00849;K00849;K00849	-	-	-
LOC100739153	831	1029	1003	1449	1338	1376	27.74	29.12	28.61	36.82	35.94	40.53	28.49	37.7633	0.40653	3.77916e-08	9.57811e-07	SRSF3	Serine/arginine-rich splicing factor 3 [Fukomys damarensis]	Human Diseases;Genetic Information Processing	Infectious diseases;Transcription	ko05168//Herpes simplex infection;ko03040//Spliceosome	K12892;K12892	-	-	-
LOC100154061	952	1145	1182	1053	1001	924	28.31	28.86	30.04	23.84	23.95	24.25	29.07	24.0133	-0.275695	3.79874e-08	9.60754e-07	CMTR1	PREDICTED: cap-specific mRNA (nucleoside-2'-O-)-methyltransferase 1 [Sus scrofa]	-	-	-	-	-	-	-
LOC100152951	535	569	606	505	448	460	49.35	44.49	47.78	35.51	33.26	37.49	47.2067	35.42	-0.414426	4.03256e-08	1.01352e-06	GSTA4	glutathione S-transferase A4 [Sus scrofa]	Human Diseases;Human Diseases;Human Diseases;Human Diseases;Human Diseases;Human Diseases;Metabolism;Metabolism;Metabolism;Metabolism	Cancers;Cancers;Cardiovascular diseases;Cancers;Cancers;Drug resistance;Xenobiotics biodegradation and metabolism;Xenobiotics biodegradation and metabolism;Xenobiotics biodegradation and metabolism;Metabolism of other amino acids	ko05200//Pathways in cancer;ko05225//Hepatocellular carcinoma;ko05418//Fluid shear stress and atherosclerosis;ko05215//Prostate cancer;ko05204//Chemical carcinogenesis;ko01524//Platinum drug resistance;ko00983//Drug metabolism - other enzymes;ko00980//Metabolism of xenobiotics by cytochrome P450;ko00982//Drug metabolism - cytochrome P450;ko00480//Glutathione metabolism	K00799;K00799;K00799;K00799;K00799;K00799;K00799;K00799;K00799;K00799	-	-	-
LOC102159820	2029	2388	2277	3159	3082	2822	31.32	31.25	30.05	37.13	38.28	38.44	30.8733	37.95	0.297739	4.1205e-08	1.03132e-06	Celsr1	PREDICTED: cadherin EGF LAG seven-pass G-type receptor 1 [Orcinus orca]	-	-	-	-	-	-	-
LOC100625049	506	575	600	500	455	444	38.96	32.96	39.74	27.58	27.41	29.36	37.22	28.1167	-0.404652	4.14384e-08	1.03502e-06	IDI1	PREDICTED: isopentenyl-diphosphate Delta-isomerase 1 isoform X1 [Sus scrofa]	Metabolism;Metabolism	Global and overview maps;Metabolism of terpenoids and polyketides	ko01100//Metabolic pathways;ko00900//Terpenoid backbone biosynthesis	K01823;K01823	-	-	-
LOC100513359	787	894	892	1316	1260	1160	11.08	10.67	10.74	14.11	14.27	14.41	10.83	14.2633	0.397278	4.22792e-08	1.05384e-06	ARID1A	PREDICTED: AT-rich interactive domain-containing protein 1A isoform X2 [Ceratotherium simum simum]	Organismal Systems;Human Diseases	Environmental adaptation;Cancers	ko04714//Thermogenesis;ko05225//Hepatocellular carcinoma	K11653;K11653	-	-	-
LOC100620497	510	559	619	525	459	404	6.6	6.13	6.85	5.17	4.78	4.61	6.52667	4.85333	-0.42737	4.36832e-08	1.08659e-06	SNTB2	PREDICTED: beta-2-syntrophin [Sus scrofa]	-	-	-	-	-	-	-
LOC100620966	776	943	947	801	806	747	21.13	21.77	22.11	16.55	17.7	17.92	21.67	17.39	-0.317441	4.49508e-08	1.11582e-06	SESN2	PREDICTED: sestrin-2 [Sus scrofa]	Environmental Information Processing;Organismal Systems;Cellular Processes	Signal transduction;Aging;Cell growth and death	ko04150//mTOR signaling pathway;ko04211//Longevity regulating pathway - mammal;ko04115//p53 signaling pathway	K20394;K20394;K20394	-	-	-
LOC100499510	812	918	943	1368	1270	1229	18.25	17.54	18.36	22.93	22.53	23.76	18.05	23.0733	0.354228	4.52785e-08	1.12164e-06	AGO1	PREDICTED: protein argonaute-1 isoform X1 [Sus scrofa]	-	-	-	-	-	-	-
LOC654294	410	499	476	394	383	338	53.26	54.95	52.85	38.97	40.03	38.75	53.6867	39.25	-0.451871	4.70183e-08	1.16235e-06	PSMB9	proteasome subunit beta type-9 [Sus scrofa]	Genetic Information Processing	Folding, sorting and degradation	ko03050//Proteasome	K02741	-	-	-
LOC100520331	304	376	326	279	249	223	23.25	24.38	21.31	16.25	15.32	15.05	22.98	15.54	-0.564392	4.72621e-08	1.16599e-06	TP53I13	PREDICTED: tumor protein p53-inducible protein 13 isoform X1 [Sus scrofa]	-	-	-	-	-	-	-
LOC396972	194	251	240	188	139	128	17.74	19.42	17.26	12.92	8.69	8.98	18.14	10.1967	-0.831077	4.85974e-08	1.19649e-06	LGALS9	galectin-9 isoform 1 [Sus scrofa]	-	-	-	-	-	-	-
LOC100520050	198	203	253	458	356	375	2.96	2.57	3.24	5.22	4.29	4.95	2.92333	4.82	0.721419	5.397e-08	1.3254e-06	PRICKLE2	PREDICTED: prickle-like protein 2 isoform X1 [Hipposideros armiger]	Environmental Information Processing	Signal transduction	ko04310//Wnt signaling pathway	K04511	-	-	-
LOC100523596	279	367	334	544	579	504	10.75	12.14	11	16.08	18.08	17.24	11.2967	17.1333	0.600909	5.53729e-08	1.35501e-06	MICALL2	PREDICTED: MICAL-like protein 2 [Orcinus orca]	Cellular Processes	Cellular community - eukaryotes	ko04530//Tight junction	K21068	-	-	-
LOC100518473	1016	1219	1236	1710	1698	1502	43.87	44.62	45.5	56.19	59.05	57.16	44.6633	57.4667	0.363634	6.18031e-08	1.50321e-06	B3GNT3	PREDICTED: N-acetyllactosaminide beta-1,3-N-acetylglucosaminyltransferase 3 [Sus scrofa]	Metabolism;Metabolism	Global and overview maps;Glycan biosynthesis and metabolism	ko01100//Metabolic pathways;ko00601//Glycosphingolipid biosynthesis - lacto and neolacto series	K07970;K07970	-	-	-
LOC100188906	1278	1512	1480	2154	1929	1833	20.26	20.43	20.15	26.1	24.66	25.59	20.28	25.45	0.327608	6.78313e-08	1.63663e-06	CHD3	PREDICTED: chromodomain-helicase-DNA-binding protein 3 isoform X1 [Sus scrofa]	-	-	-	-	-	-	-
LOC100738234	965	1130	1115	1605	1490	1456	21.7	21.54	21.43	27.48	26.96	28.9	21.5567	27.78	0.365912	7.1399e-08	1.71928e-06	EHD4	PREDICTED: EH domain-containing protein 4 [Carlito syrichta]	Cellular Processes	Transport and catabolism	ko04144//Endocytosis	K12477	-	-	-
LOC100522653	1027	1300	1343	1908	1678	1620	24.95	26.77	27.89	35.29	32.8	34.73	26.5367	34.2733	0.369099	7.2286e-08	1.73717e-06	B4GALT5	PREDICTED: beta-1,4-galactosyltransferase 5 isoform X1 [Sus scrofa]	Metabolism;Metabolism	Global and overview maps;Glycan biosynthesis and metabolism	ko01100//Metabolic pathways;ko00512//Mucin type O-glycan biosynthesis	K09905;K09905	-	-	-
LOC100521177	277	336	316	274	214	190	14.95	14.92	14.51	11.1	9.34	8.99	14.7933	9.81	-0.592622	7.40169e-08	1.77523e-06	HDHD2	PREDICTED: haloacid dehalogenase-like hydrolase domain-containing protein 2 isoform X1 [Sus scrofa]	-	-	-	-	-	-	-
LOC100628094	263	228	249	461	450	406	18.24	13.41	14.76	24.35	25.12	24.85	15.47	24.7733	0.679315	7.52313e-08	1.79721e-06	NCCRP1	PREDICTED: F-box only protein 50 [Sus scrofa]	-	-	-	-	-	-	-
LOC100523834	594	801	767	1148	1136	961	7.23	8.27	7.98	10.64	11.13	10.32	7.82667	10.6967	0.450691	7.56016e-08	1.80249e-06	HCFC1	PREDICTED: host cell factor 1 isoform X6 [Sus scrofa]	Human Diseases	Infectious diseases	ko05168//Herpes simplex infection	K14966	-	-	-
LOC100522643	542	641	686	970	936	904	8.71	8.73	9.42	11.86	12.1	12.81	8.95333	12.2567	0.45307	7.69521e-08	1.83107e-06	PLXNB1	PREDICTED: LOW QUALITY PROTEIN: plexin-B1 [Camelus bactrianus]	Organismal Systems	Development	ko04360//Axon guidance	K06821	-	-	-
LOC110257935	222	254	301	512	452	385	3.84	3.73	4.46	6.75	6.3	5.89	4.01	6.31333	0.6548	7.97063e-08	1.89287e-06	MXRA5	PREDICTED: matrix-remodeling-associated protein 5 [Sus scrofa]	-	-	-	-	-	-	-
LOC100737774	40	50	44	119	121	111	0.6	0.64	0.57	1.36	1.47	1.48	0.603333	1.43667	1.2517	8.02509e-08	1.90206e-06	LRRC17	PREDICTED: leucine-rich repeat-containing protein 17 [Sus scrofa]	-	-	-	-	-	-	-
LOC397040	353	416	400	297	322	288	15.99	16.67	16.35	10.18	11.42	11.45	16.3367	11.0167	-0.568426	8.14901e-08	1.92764e-06	UGP2	PREDICTED: UTP--glucose-1-phosphate uridylyltransferase isoform X1 [Vicugna pacos]	Metabolism;Metabolism;Metabolism;Metabolism;Metabolism	Global and overview maps;Carbohydrate metabolism;Carbohydrate metabolism;Carbohydrate metabolism;Carbohydrate metabolism	ko01100//Metabolic pathways;ko00520//Amino sugar and nucleotide sugar metabolism;ko00500//Starch and sucrose metabolism;ko00052//Galactose metabolism;ko00040//Pentose and glucuronate interconversions	K00963;K00963;K00963;K00963;K00963	-	-	-
LOC397596	121	181	129	324	288	243	5.85	7.42	5.33	11.93	11.21	10.37	6.2	11.17	0.849289	8.18441e-08	1.93223e-06	RHOT2	mitochondrial Rho GTPase 2 [Sus scrofa]	Cellular Processes	Transport and catabolism	ko04137//Mitophagy - animal	K07871	-	-	-
LOC100621588	164	178	173	132	98	90	4.08	3.76	3.68	2.5	1.96	1.98	3.84	2.14667	-0.839008	8.29657e-08	1.95488e-06	FICD	PREDICTED: adenosine monophosphate-protein transferase FICD [Sus scrofa]	-	-	-	-	-	-	-
LOC102163628	844	1032	1005	1576	1301	1306	11.33	11.74	11.5	16.05	14	15.42	11.5233	15.1567	0.395394	8.39124e-08	1.97333e-06	SEC16A	PREDICTED: protein transport protein Sec16A isoform X3 [Ceratotherium simum simum]	-	-	-	-	-	-	-
LOC100154509	397	544	491	766	733	770	28.67	33.5	30.86	42.58	43.2	50.02	31.01	45.2667	0.545716	8.79367e-08	2.05855e-06	SRSF5	PREDICTED: serine/arginine-rich splicing factor 5 isoform X1 [Sus scrofa]	Human Diseases;Genetic Information Processing	Infectious diseases;Transcription	ko05168//Herpes simplex infection;ko03040//Spliceosome	K12893;K12893	-	-	-
LOC100514856	577	586	655	969	909	893	10.01	8.64	9.78	12.85	12.71	13.72	9.47667	13.0933	0.466381	8.80301e-08	2.05855e-06	APBB2	PREDICTED: amyloid beta A4 precursor protein-binding family B member 2 isoform X1 [Sus scrofa]	-	-	-	-	-	-	-
LOC100154722	731	841	828	799	686	621	22.35	21.8	21.64	18.6	16.88	16.76	21.93	17.4133	-0.332713	8.8048e-08	2.05855e-06	MTHFD1L	PREDICTED: monofunctional C1-tetrahydrofolate synthase, mitochondrial [Tursiops truncatus]	Metabolism;Metabolism	Global and overview maps;Metabolism of cofactors and vitamins	ko01100//Metabolic pathways;ko00670//One carbon pool by folate	K13402;K13402	-	-	-
LOC100144442	78	95	87	49	41	31	4.54	4.69	4.33	2.17	1.92	1.59	4.52	1.89333	-1.25539	9.04919e-08	2.11159e-06	F2	prothrombin [Sus scrofa]	Environmental Information Processing;Cellular Processes;Organismal Systems	Signaling molecules and interaction;Cell motility;Immune system	ko04080//Neuroactive ligand-receptor interaction;ko04810//Regulation of actin cytoskeleton;ko04610//Complement and coagulation cascades	K01313;K01313;K01313	-	-	-
MSTRG.11451	919	1064	1015	941	923	848	77.67	76.05	73.45	59.97	62.38	62.93	75.7233	61.76	-0.294065	9.1131e-08	2.1224e-06	SERPINB6	PREDICTED: serpin B6 [Camelus ferus]	Human Diseases	Infectious diseases	ko05146//Amoebiasis	K13963	GO:0031988//membrane-bounded vesicle;GO:0032991//macromolecular complex;GO:0044421//extracellular region part;GO:0044424//intracellular part	-	-
LOC100624415	1051	1355	1151	1119	1120	904	29.56	32.31	27.67	23.96	25.34	22.44	29.8467	23.9133	-0.319755	9.49361e-08	2.2063e-06	DAPK3	PREDICTED: death-associated protein kinase 3 [Sus scrofa]	Human Diseases;Cellular Processes;Human Diseases	Cancers;Transport and catabolism;Cancers	ko05200//Pathways in cancer;ko04140//Autophagy - animal;ko05219//Bladder cancer	K08803;K08803;K08803	-	-	-
LOC100514228	368	440	434	696	629	628	12.94	13.11	12.95	18.59	17.74	19.46	13	18.5967	0.516532	9.50992e-08	2.2063e-06	DCAF6	PREDICTED: DDB1- and CUL4-associated factor 6 isoform X2 [Ovis aries]	-	-	-	-	GO:0005924//cell-substrate adherens junction;GO:0031461//cullin-RING ubiquitin ligase complex;GO:0031981//nuclear lumen	GO:0003713//transcription coactivator activity	GO:0006357//regulation of transcription from RNA polymerase II promoter;GO:0032446//protein modification by small protein conjugation
LOC100521547	344	389	394	273	320	266	13.53	12.97	13.24	8.17	10.12	9.23	13.2467	9.17333	-0.530111	1.05742e-07	2.4485e-06	Carhsp1	PREDICTED: calcium-regulated heat stable protein 1 isoform X2 [Sus scrofa]	-	-	-	-	-	-	-
LOC100522492	585	672	692	1084	934	891	26.85	26.15	27.15	37.88	34.49	36.09	26.7167	36.1533	0.436389	1.0608e-07	2.45162e-06	ELMO3	PREDICTED: engulfment and cell motility protein 3 isoform X3 [Sus scrofa]	Human Diseases;Human Diseases	Infectious diseases;Infectious diseases	ko05100//Bacterial invasion of epithelial cells;ko05131//Shigellosis	K19241;K19241	-	-	-
LOC102158177	506	605	596	915	822	851	8.06	8.17	8.11	11.09	10.53	11.96	8.11333	11.1933	0.464273	1.09309e-07	2.51661e-06	MLLT6	PREDICTED: protein AF-17 isoform X2 [Bos taurus]	-	-	-	-	-	-	-
LOC100144475	170	211	213	386	372	303	20.21	21.26	21.64	34.93	35.58	31.79	21.0367	34.1	0.696866	1.09879e-07	2.52491e-06	Ndn	necdin [Sus scrofa]	-	-	-	-	-	-	-
LOC100520674	151	155	152	82	102	88	2.65	2.29	2.24	1.07	1.42	1.35	2.39333	1.28	-0.902878	1.1242e-07	2.57371e-06	KIF21A	PREDICTED: kinesin-like protein KIF21A isoform X1 [Sus scrofa]	-	-	-	-	-	-	-
LOC100624334	434	522	539	824	753	711	13.25	13.48	14.01	19.11	18.44	19.01	13.58	18.8533	0.473336	1.12429e-07	2.57371e-06	GLIS2	PREDICTED: zinc finger protein GLIS2 isoform X1 [Sus scrofa]	-	-	-	-	-	-	-
LOC102167153	748	835	879	1225	1239	1125	19.7	18.6	19.85	24.75	26.47	26.34	19.3833	25.8533	0.415534	1.20003e-07	2.73154e-06	Ptk2	PREDICTED: focal adhesion kinase 1 isoform X1 [Balaenoptera acutorostrata scammoni]	Human Diseases;Environmental Information Processing;Human Diseases;Human Diseases;Cellular Processes;Human Diseases;Cellular Processes;Human Diseases;Organismal Systems;Organismal Systems;Human Diseases;Human Diseases;Organismal Systems;Human Diseases;Human Diseases;Environmental Information Processing;Human Diseases;Environmental Information Processing	Cancers;Signal transduction;Infectious diseases;Infectious diseases;Cell motility;Cancers;Cellular community - eukaryotes;Cancers;Immune system;Development;Cardiovascular diseases;Infectious diseases;Immune system;Cancers;Drug resistance;Signal transduction;Infectious diseases;Signal transduction	ko05200//Pathways in cancer;ko04151//PI3K-Akt signaling pathway;ko05165//Human papillomavirus infection;ko05163//Human cytomegalovirus infection;ko04810//Regulation of actin cytoskeleton;ko05205//Proteoglycans in cancer;ko04510//Focal adhesion;ko05202//Transcriptional misregulation in cancers;ko04062//Chemokine signaling pathway;ko04360//Axon guidance;ko05418//Fluid shear stress and atheroscleros…	K05725;K05725;K05725;K05725;K05725;K05725;K05725;K05725;K05725;K05725;K05725;K05725;K05725;K05725;K05725;K05725;K05725;K05725	-	-	-
LOC100511356	281	297	328	540	572	429	8.3	7.01	7.6	11.66	13.38	11	7.63667	12.0133	0.653622	1.21927e-07	2.76538e-06	NOM1	PREDICTED: nucleolar MIF4G domain-containing protein 1 [Sus scrofa]	-	-	-	-	-	-	-
LOC100156353	781	899	885	1329	1209	1157	19.57	19.16	18.99	25.38	24.36	25.59	19.24	25.11	0.384153	1.2829e-07	2.90358e-06	ACIN1	PREDICTED: apoptotic chromatin condensation inducer in the nucleus isoform X1 [Orcinus orca]	Genetic Information Processing;Genetic Information Processing;Genetic Information Processing	Translation;Transcription;Translation	ko03013//RNA transport;ko03040//Spliceosome;ko03015//mRNA surveillance pathway	K12875;K12875;K12875	-	-	-
LOC100125555	125	170	169	88	104	86	22.3	25.63	25.56	12.1	15.17	13.83	24.4967	13.7	-0.83841	1.28524e-07	2.90358e-06	LY96	lymphocyte antigen 96 [Sus scrofa]	Organismal Systems;Environmental Information Processing;Human Diseases;Human Diseases;Human Diseases	Immune system;Signal transduction;Infectious diseases;Infectious diseases;Infectious diseases	ko04620//Toll-like receptor signaling pathway;ko04064//NF-kappa B signaling pathway;ko05145//Toxoplasmosis;ko05130//Pathogenic Escherichia coli infection;ko05133//Pertussis	K05400;K05400;K05400;K05400;K05400	-	-	-
LOC100514844	800	1010	1041	898	865	789	77	82.4	85.63	65.81	67.03	67.02	81.6767	66.62	-0.293969	1.31927e-07	2.9749e-06	YIF1B	PREDICTED: protein YIF1B isoform X1 [Sus scrofa]	-	-	-	-	-	-	-
LOC100625825	358	424	414	667	621	592	7.68	7.19	7.65	10.68	10.68	10.73	7.50667	10.6967	0.510917	1.32426e-07	2.98057e-06	ZMYM2	PREDICTED: zinc finger MYM-type protein 2 isoform X1 [Ceratotherium simum simum]	-	-	-	-	-	-	-
LOC100621904	875	973	947	1435	1341	1234	22.35	21.1	20.73	27.89	27.54	27.77	21.3933	27.7333	0.37446	1.40682e-07	3.15462e-06	KDM4A	PREDICTED: lysine-specific demethylase 4A [Felis catus]	-	-	-	-	-	-	-
LOC100524547	320	339	355	627	522	507	11.75	10.55	11.14	17.52	15.49	16.43	11.1467	16.48	0.564104	1.41863e-07	3.1752e-06	SH3BP5L	PREDICTED: SH3 domain-binding protein 5-like isoform X1 [Sus scrofa]	-	-	-	-	-	-	-
LOC397070	666	831	826	1270	1087	1047	15.42	16.31	16.34	22.38	20.25	21.39	16.0233	21.34	0.413386	1.4475e-07	3.23382e-06	EGFR	epidermal growth factor receptor precursor [Sus scrofa]	Human Diseases;Environmental Information Processing;Human Diseases;Environmental Information Processing;Human Diseases;Cellular Processes;Environmental Information Processing;Cellular Processes;Environmental Information Processing;Human Diseases;Cellular Processes;Environmental Information Processing;Environmental Information Processing;Human Diseases;Human Diseases;Human Diseases;Human Diseases;…	Cancers;Signal transduction;Infectious diseases;Signal transduction;Infectious diseases;Transport and catabolism;Signal transduction;Cell motility;Signal transduction;Cancers;Cellular community - eukaryotes;Signal transduction;Signal transduction;Cancers;Cancers;Endocrine and metabolic diseases;Cancers;Endocrine system;Signal transduction;Cancers;Infectious diseases;Endocrine system;Endocrine sys…	ko05200//Pathways in cancer;ko04151//PI3K-Akt signaling pathway;ko05165//Human papillomavirus infection;ko04010//MAPK signaling pathway;ko05163//Human cytomegalovirus infection;ko04144//Endocytosis;ko04014//Ras signaling pathway;ko04810//Regulation of actin cytoskeleton;ko04015//Rap1 signaling pathway;ko05205//Proteoglycans in cancer;ko04510//Focal adhesion;ko04020//Calcium signaling pathway;ko04…	K04361;K04361;K04361;K04361;K04361;K04361;K04361;K04361;K04361;K04361;K04361;K04361;K04361;K04361;K04361;K04361;K04361;K04361;K04361;K04361;K04361;K04361;K04361;K04361;K04361;K04361;K04361;K04361;K04361;K04361;K04361;K04361;K04361;K04361;K04361;K04361;K04361;K04361;K04361;K04361;K04361;K04361;K04361	-	-	-
LOC100512105	318	360	369	645	523	531	5.95	5.66	5.85	9.1	7.81	8.69	5.82	8.53333	0.55209	1.51841e-07	3.37351e-06	ZCCHC14	PREDICTED: zinc finger CCHC domain-containing protein 14 isoform X1 [Sus scrofa]	-	-	-	-	-	-	-
LOC100514159	587	623	629	991	919	850	5.56	5	5.1	7.15	7.01	7.11	5.22	7.09	0.441736	1.52954e-07	3.39199e-06	SRCAP	PREDICTED: helicase SRCAP isoform X1 [Sus scrofa]	-	-	-	-	GO:0032991//macromolecular complex;GO:0043231//intracellular membrane-bounded organelle	GO:0032550//purine ribonucleoside binding	-
LOC100738859	599	677	675	537	588	527	31.71	30.42	30.57	21.66	25.07	24.64	30.9	23.79	-0.377252	1.55158e-07	3.42864e-06	HIST2H2BE	histone H2B type 2-E [Homo sapiens]	-	-	-	-	-	-	-
LOC100625072	257	290	298	247	195	172	6.53	6.24	6.47	4.78	3.98	3.85	6.41333	4.20333	-0.609541	1.55176e-07	3.42864e-06	PTGER4	PREDICTED: prostaglandin E2 receptor EP4 subtype isoform X1 [Balaenoptera acutorostrata scammoni]	Human Diseases;Human Diseases;Environmental Information Processing;Human Diseases;Organismal Systems;Organismal Systems	Cancers;Infectious diseases;Signaling molecules and interaction;Infectious diseases;Sensory system;Endocrine system	ko05200//Pathways in cancer;ko05165//Human papillomavirus infection;ko04080//Neuroactive ligand-receptor interaction;ko05163//Human cytomegalovirus infection;ko04750//Inflammatory mediator regulation of TRP channels;ko04924//Renin secretion	K04261;K04261;K04261;K04261;K04261;K04261	-	-	-
LOC100523725	270	349	318	503	539	511	9.69	10.72	9.83	13.6	15.5	16.19	10.08	15.0967	0.582734	1.64813e-07	3.63492e-06	Axin1	PREDICTED: axin-1 isoform X1 [Sus scrofa]	Human Diseases;Human Diseases;Human Diseases;Human Diseases;Environmental Information Processing;Human Diseases;Human Diseases;Cellular Processes;Environmental Information Processing;Human Diseases;Human Diseases;Human Diseases	Cancers;Infectious diseases;Cancers;Endocrine and metabolic diseases;Signal transduction;Cancers;Cancers;Cellular community - eukaryotes;Signal transduction;Cancers;Cancers;Cancers	ko05200//Pathways in cancer;ko05165//Human papillomavirus infection;ko05225//Hepatocellular carcinoma;ko04934//Cushing syndrome;ko04390//Hippo signaling pathway;ko05226//Gastric cancer;ko05224//Breast cancer;ko04550//Signaling pathways regulating pluripotency of stem cells;ko04310//Wnt signaling pathway;ko05210//Colorectal cancer;ko05217//Basal cell carcinoma;ko05213//Endometrial cancer	K02157;K02157;K02157;K02157;K02157;K02157;K02157;K02157;K02157;K02157;K02157;K02157	-	-	-
LOC397278	204	229	278	193	156	139	22	20.94	25.63	15.85	13.54	13.23	22.8567	14.2067	-0.686047	1.7174e-07	3.76705e-06	PMAIP1	phorbol-12-myristate-13-acetate-induced protein 1 [Sus scrofa]	Human Diseases;Human Diseases;Cellular Processes;Human Diseases;Cellular Processes;Human Diseases;Cellular Processes	Cancers;Cancers;Cell growth and death;Cancers;Cell growth and death;Drug resistance;Cell growth and death	ko05200//Pathways in cancer;ko05203//Viral carcinogenesis;ko04210//Apoptosis;ko05210//Colorectal cancer;ko04115//p53 signaling pathway;ko01524//Platinum drug resistance;ko04215//Apoptosis - multiple species	K10131;K10131;K10131;K10131;K10131;K10131;K10131	-	-	-
LOC397480	440	483	470	422	385	327	35.92	33.43	32.87	26.27	25.27	23.58	34.0733	25.04	-0.444409	1.73559e-07	3.80003e-06	HSD11B1	corticosteroid 11-beta-dehydrogenase isozyme 1 isoform 1 [Sus scrofa]	Metabolism;Human Diseases;Metabolism;Metabolism	Global and overview maps;Cancers;Xenobiotics biodegradation and metabolism;Lipid metabolism	ko01100//Metabolic pathways;ko05204//Chemical carcinogenesis;ko00980//Metabolism of xenobiotics by cytochrome P450;ko00140//Steroid hormone biosynthesis	K15680;K15680;K15680;K15680	-	-	-
LOC100523927	1073	1256	1143	1837	1697	1446	17.51	17.38	15.95	22.83	22.29	20.83	16.9467	21.9833	0.375409	1.75938e-07	3.84514e-06	EIF4EBP2	eukaryotic translation initiation factor 4E-binding protein 2 [Bos taurus]	Genetic Information Processing;Organismal Systems	Translation;Aging	ko03013//RNA transport;ko04213//Longevity regulating pathway - multiple species	K18644;K18644	-	-	-
LOC110255263	341	422	389	298	289	307	26.05	27.36	25.39	17.35	17.78	20.74	26.2667	18.6233	-0.496122	1.7974e-07	3.92114e-06	C4orf3	PREDICTED: uncharacterized protein C4orf3 homolog [Sus scrofa]	-	-	-	-	-	-	-
LOC110256877	491	540	485	443	420	381	12.08	11.26	10.19	8.29	8.31	8.28	11.1767	8.29333	-0.430466	1.84069e-07	4.00833e-06	IRF2BP2	PREDICTED: interferon regulatory factor 2-binding protein 2 isoform X1 [Capra hircus]	-	-	-	-	-	-	-
LOC100135031	644	799	689	658	642	504	48.54	55.34	47.19	39.62	41.83	35.03	50.3567	38.8267	-0.375135	1.95833e-07	4.25681e-06	HLA-A	MHC class I antigen [Sus scrofa]	Human Diseases;Human Diseases;Human Diseases;Cellular Processes;Human Diseases;Human Diseases;Human Diseases;Human Diseases;Cellular Processes;Cellular Processes;Environmental Information Processing;Organismal Systems;Human Diseases;Organismal Systems;Human Diseases;Human Diseases;Human Diseases;Human Diseases	Infectious diseases;Infectious diseases;Infectious diseases;Transport and catabolism;Infectious diseases;Infectious diseases;Infectious diseases;Cancers;Cell growth and death;Transport and catabolism;Signaling molecules and interaction;Immune system;Cardiovascular diseases;Immune system;Immune diseases;Endocrine and metabolic diseases;Immune diseases;Immune diseases	ko05165//Human papillomavirus infection;ko05166//HTLV-I infection;ko05163//Human cytomegalovirus infection;ko04144//Endocytosis;ko05168//Herpes simplex infection;ko05169//Epstein-Barr virus infection;ko05167//Kaposi sarcoma-associated herpesvirus infection;ko05203//Viral carcinogenesis;ko04218//Cellular senescence;ko04145//Phagosome;ko04514//Cell adhesion molecules (CAMs);ko04650//Natural killer …	K06751;K06751;K06751;K06751;K06751;K06751;K06751;K06751;K06751;K06751;K06751;K06751;K06751;K06751;K06751;K06751;K06751;K06751	-	-	-
LOC100628208	1287	1500	1337	2097	1987	1741	35.45	35.03	31.48	43.97	44.04	42.32	33.9867	43.4433	0.354166	1.99086e-07	4.31973e-06	C2CD2	PREDICTED: C2 domain-containing protein 2 [Sus scrofa]	-	-	-	-	-	-	-
LOC100524850	937	1147	1168	1654	1631	1356	23.81	24.7	25.36	31.99	33.34	30.4	24.6233	31.91	0.373983	2.10811e-07	4.55776e-06	NACC1	PREDICTED: nucleus accumbens-associated protein 1 [Sus scrofa]	-	-	-	-	-	-	-
LOC100157450	576	669	636	948	980	886	9.61	9.46	9.07	12.04	13.16	13.05	9.38	12.75	0.442837	2.20046e-07	4.74889e-06	MED12	PREDICTED: mediator of RNA polymerase II transcription subunit 12 [Sus scrofa]	Organismal Systems	Endocrine system	ko04919//Thyroid hormone signaling pathway	K15162	-	-	-
LOC100156262	1024	1069	1102	1591	1507	1468	41.32	35.71	38.19	48.14	46.3	46.78	38.4067	47.0733	0.293553	2.24079e-07	4.8273e-06	PAPSS2	PREDICTED: bifunctional 3'-phosphoadenosine 5'-phosphosulfate synthase 2 [Sus scrofa]	Metabolism;Metabolism;Metabolism;Metabolism;Metabolism	Global and overview maps;Nucleotide metabolism;Metabolism of other amino acids;Energy metabolism;Biosynthesis of other secondary metabolites	ko01100//Metabolic pathways;ko00230//Purine metabolism;ko00450//Selenocompound metabolism;ko00920//Sulfur metabolism;ko00261//Monobactam biosynthesis	K13811;K13811;K13811;K13811;K13811	-	-	-
LOC100144486	228	249	216	461	394	357	23.19	21.47	18.78	35.7	32.25	32.05	21.1467	33.3333	0.656535	2.26427e-07	4.86918e-06	FOS	proto-oncogene c-Fos [Sus scrofa]	Human Diseases;Environmental Information Processing;Human Diseases;Human Diseases;Environmental Information Processing;Human Diseases;Human Diseases;Organismal Systems;Human Diseases;Human Diseases;Cellular Processes;Organismal Systems;Organismal Systems;Organismal Systems;Organismal Systems;Organismal Systems;Organismal Systems;Environmental Information Processing;Human Diseases;Organismal Syste…	Cancers;Signal transduction;Infectious diseases;Infectious diseases;Signal transduction;Infectious diseases;Infectious diseases;Endocrine system;Cardiovascular diseases;Cancers;Cell growth and death;Development;Endocrine system;Endocrine system;Nervous system;Immune system;Immune system;Signal transduction;Infectious diseases;Nervous system;Immune system;Endocrine system;Infectious diseases;Immun…	ko05200//Pathways in cancer;ko04010//MAPK signaling pathway;ko05166//HTLV-I infection;ko05168//Herpes simplex infection;ko04024//cAMP signaling pathway;ko05167//Kaposi sarcoma-associated herpesvirus infection;ko05161//Hepatitis B;ko04921//Oxytocin signaling pathway;ko05418//Fluid shear stress and atherosclerosis;ko05224//Breast cancer;ko04210//Apoptosis;ko04380//Osteoclast differentiation;ko04915…	K04379;K04379;K04379;K04379;K04379;K04379;K04379;K04379;K04379;K04379;K04379;K04379;K04379;K04379;K04379;K04379;K04379;K04379;K04379;K04379;K04379;K04379;K04379;K04379;K04379;K04379;K04379;K04379;K04379;K04379;K04379;K04379;K04379;K04379;K04379	-	-	-
LOC396780	12	6	29	77	60	71	1.27	0.54	2.62	6.19	5.1	6.62	1.47667	5.97	2.01539	2.37804e-07	5.10475e-06	CBR2	carbonyl reductase [NADPH] 2 [Sus scrofa]	Metabolism;Metabolism;Metabolism	Global and overview maps;Lipid metabolism;Xenobiotics biodegradation and metabolism	ko01100//Metabolic pathways;ko00590//Arachidonic acid metabolism;ko00980//Metabolism of xenobiotics by cytochrome P450	K00081;K00081;K00081	-	-	-
LOC100049700	1642	1878	1921	2625	2530	2228	39.09	37.9	39.09	47.58	48.48	46.82	38.6933	47.6267	0.299685	2.42514e-07	5.19661e-06	AP3D1	adaptor-related protein complex 3, delta-1 subunit, partial [Sus scrofa]	Cellular Processes	Transport and catabolism	ko04142//Lysosome	K12396	-	-	-
LOC110260648	447	540	533	829	810	682	11.11	11.38	11.31	15.69	16.2	14.96	11.2667	15.6167	0.471026	2.4528e-07	5.23727e-06	CARD10	PREDICTED: caspase recruitment domain-containing protein 10 isoform X1 [Vicugna pacos]	Environmental Information Processing	Signal transduction	ko04064//NF-kappa B signaling pathway	K20912	-	-	-
LOC100625699	238	301	261	195	204	181	9.14	9.8	8.57	5.7	6.3	6.13	9.17	6.04333	-0.601577	2.47164e-07	5.26817e-06	NUAK2	PREDICTED: NUAK family SNF1-like kinase 2 isoform X1 [Sus scrofa]	-	-	-	-	-	-	-
LOC100158187	1060	1092	1214	1112	1001	959	38.21	33.37	37.41	30.52	29.04	30.51	36.33	30.0233	-0.275077	2.59215e-07	5.48626e-06	PLS3	PREDICTED: plastin-3 isoform X2 [Sus scrofa]	-	-	-	-	-	-	-
LOC100157961	551	671	694	1165	905	864	18.09	18.7	19.5	29.14	23.93	25.01	18.7633	26.0267	0.472074	2.6668e-07	5.63437e-06	FERMT1	PREDICTED: fermitin family homolog 1 [Sus scrofa]	-	-	-	-	-	-	-
LOC100519194	191	187	191	385	324	312	1.4	1.17	1.2	2.15	1.92	2.02	1.25667	2.03	0.691878	2.79631e-07	5.86691e-06	ZFHX3	PREDICTED: zinc finger homeobox protein 3 [Canis lupus familiaris]	Cellular Processes	Cellular community - eukaryotes	ko04550//Signaling pathways regulating pluripotency of stem cells	K09378	-	-	-
LOC100154506	247	331	338	234	236	214	5.06	5.7	6.08	3.6	3.86	3.91	5.61333	3.79	-0.56666	2.89952e-07	6.07289e-06	ENTPD5	PREDICTED: ectonucleoside triphosphate diphosphohydrolase 5 isoform X1 [Sus scrofa]	Metabolism;Metabolism	Nucleotide metabolism;Nucleotide metabolism	ko00230//Purine metabolism;ko00240//Pyrimidine metabolism	K01511;K01511	-	-	-
LOC100512542	411	373	425	683	665	604	5.52	4.25	4.88	6.98	7.19	7.16	4.88333	7.11	0.541983	2.99825e-07	6.26879e-06	SOX4	PREDICTED: transcription factor SOX-4 [Sus scrofa]	Human Diseases	Cancers	ko05206//MicroRNAs in cancer	K09268	-	-	-
LOC100520763	246	296	268	492	425	431	9.33	9.51	8.68	14.2	12.96	14.42	9.17333	13.86	0.595409	3.19062e-07	6.63649e-06	HEXIM1	PREDICTED: protein HEXIM1 [Sus scrofa]	-	-	-	-	-	-	-
LOC100171403	1008	1063	1103	1063	956	890	41.91	37.45	39.16	33.64	31.95	32.65	39.5067	32.7467	-0.270748	3.21951e-07	6.6766e-06	Elovl5	PREDICTED: elongation of very long chain fatty acids protein 5 isoform X1 [Sus scrofa]	Metabolism;Metabolism;Metabolism;Metabolism	Global and overview maps;Global and overview maps;Lipid metabolism;Lipid metabolism	ko01100//Metabolic pathways;ko01212//Fatty acid metabolism;ko00062//Fatty acid elongation;ko01040//Biosynthesis of unsaturated fatty acids	K10244;K10244;K10244;K10244	-	-	-
LOC100518270	127	138	150	91	80	81	8.99	8.18	9.24	4.95	4.47	5.15	8.80333	4.85667	-0.858083	3.22097e-07	6.6766e-06	RHEX	PREDICTED: uncharacterized protein C1orf186 homolog isoform X1 [Sus scrofa]	-	-	-	-	-	-	-
LOC100517184	648	682	668	1154	990	877	8.12	7.23	7.06	10.78	9.84	9.74	7.47	10.12	0.438029	3.37919e-07	6.99255e-06	FAM208B	PREDICTED: LOW QUALITY PROTEIN: protein FAM208B [Balaenoptera acutorostrata scammoni]	-	-	-	-	-	-	-
LOC100516724	428	533	500	773	803	671	21.01	22.18	20.98	28.89	31.72	29.07	21.39	29.8933	0.482887	3.48375e-07	7.19657e-06	NR2F6	PREDICTED: nuclear receptor subfamily 2 group F member 6 [Canis lupus familiaris]	-	-	-	-	-	-	-
LOC100514381	399	385	400	687	630	574	7.76	6.23	6.11	10.83	8.97	9.53	6.7	9.77667	0.545182	3.65765e-07	7.51718e-06	PLEKHA8	PREDICTED: pleckstrin homology domain-containing family A member 8 isoform X1 [Sus scrofa]	-	-	-	-	GO:0031984//organelle subcompartment;GO:0043231//intracellular membrane-bounded organelle	GO:0005319//lipid transporter activity;GO:0033218//amide binding;GO:1901981//phosphatidylinositol phosphate binding	GO:0008104//protein localization;GO:0032365//intracellular lipid transport
LOC100512960	555	634	599	962	914	796	16.26	15.75	14.99	21.47	21.56	20.6	15.6667	21.21	0.437046	3.70528e-07	7.60212e-06	TRIB1	PREDICTED: tribbles homolog 1 [Orcinus orca]	-	-	-	-	-	-	-
LOC100511744	193	251	244	419	379	369	4.41	4.69	4.72	7.26	7.2	7.14	4.60667	7.2	0.644274	3.81128e-07	7.80632e-06	ARAP3	PREDICTED: arf-GAP with Rho-GAP domain, ANK repeat and PH domain-containing protein 3 isoform X2 [Sus scrofa]	Cellular Processes;Environmental Information Processing;Environmental Information Processing	Transport and catabolism;Signal transduction;Signal transduction	ko04144//Endocytosis;ko04015//Rap1 signaling pathway;ko04024//cAMP signaling pathway	K12490;K12490;K12490	-	-	-
LOC100524374	912	1050	1051	1555	1334	1428	28.5	27.81	28.07	36.99	33.54	39.38	28.1267	36.6367	0.38135	3.85179e-07	7.87594e-06	ATXN7L3B	PREDICTED: putative ataxin-7-like protein 3B [Pan troglodytes]	-	-	-	-	-	-	-
LOC100155180	1980	2378	2467	3288	3153	2734	128.41	129.95	136.83	161.84	163.96	155.77	131.73	160.523	0.285199	4.00206e-07	8.15555e-06	OSR2	PREDICTED: LOW QUALITY PROTEIN: protein odd-skipped-related 2 [Cebus capucinus imitator]	-	-	-	-	-	-	-
LOC100522721	216	278	255	473	409	377	4.77	5.26	4.9	8.08	7.36	7.51	4.97667	7.65	0.62028	4.10393e-07	8.34905e-06	RASGRP1	PREDICTED: RAS guanyl-releasing protein 1 isoform X1 [Sus scrofa]	Human Diseases;Environmental Information Processing;Environmental Information Processing;Organismal Systems;Organismal Systems	Cancers;Signal transduction;Signal transduction;Immune system;Immune system	ko05200//Pathways in cancer;ko04010//MAPK signaling pathway;ko04014//Ras signaling pathway;ko04611//Platelet activation;ko04660//T cell receptor signaling pathway	K04350;K04350;K04350;K04350;K04350	-	-	-
LOC100522469	437	526	496	404	427	377	26.55	26.46	23.67	19.31	20.33	20.45	25.56	20.03	-0.351725	4.30642e-07	8.74625e-06	DUSP1	dual specificity protein phosphatase 1 [Sus scrofa]	Environmental Information Processing;Human Diseases;Organismal Systems	Signal transduction;Cardiovascular diseases;Nervous system	ko04010//MAPK signaling pathway;ko05418//Fluid shear stress and atherosclerosis;ko04726//Serotonergic synapse	K21278;K21278;K21278	-	-	-
LOC100157830	819	926	965	863	728	812	43.06	41.35	43.38	34.87	30.55	37.75	42.5967	34.39	-0.308751	4.41901e-07	8.95983e-06	ECD	PREDICTED: protein ecdysoneless homolog isoform X2 [Sus scrofa]	-	-	-	-	-	-	-
LOC100037972	1300	1613	1511	2148	2129	1834	64.49	68.22	63.97	81.02	84.95	80.42	65.56	82.13	0.325093	4.54599e-07	9.20182e-06	SLC7A7	Y+L amino acid transporter 1 [Sus scrofa]	Organismal Systems	Digestive system	ko04974//Protein digestion and absorption	K13867	-	-	-
LOC110256379	35	26	26	7	3	5	2.54	1.8	1.58	0.67	0.2	0.49	1.97333	0.453333	-2.12199	4.56083e-07	9.21639e-06	NMRAL1	PREDICTED: LOW QUALITY PROTEIN: nmrA-like family domain-containing protein 1 [Capra hircus]	-	-	-	-	-	-	-
LOC397636	387	445	453	734	623	633	9.03	8.93	8.88	13.16	11.74	13.24	8.94667	12.7133	0.50692	4.57228e-07	9.22408e-06	ATP2B1	PREDICTED: plasma membrane calcium-transporting ATPase 1 isoform X4 [Chlorocebus sabaeus]	Environmental Information Processing;Environmental Information Processing;Environmental Information Processing;Organismal Systems;Organismal Systems;Organismal Systems;Organismal Systems;Organismal Systems;Organismal Systems	Signal transduction;Signal transduction;Signal transduction;Circulatory system;Digestive system;Endocrine system;Digestive system;Digestive system;Excretory system	ko04024//cAMP signaling pathway;ko04020//Calcium signaling pathway;ko04022//cGMP - PKG signaling pathway;ko04261//Adrenergic signaling in cardiomyocytes;ko04972//Pancreatic secretion;ko04925//Aldosterone synthesis and secretion;ko04970//Salivary secretion;ko04978//Mineral absorption;ko04961//Endocrine and other factor-regulated calcium reabsorption	K05850;K05850;K05850;K05850;K05850;K05850;K05850;K05850;K05850	-	-	-
LOC100515635	131	112	110	80	45	61	4.64	3.08	3.34	1.88	0.99	1.71	3.68667	1.52667	-1.27193	4.6059e-07	9.27639e-06	CREB5	PREDICTED: cyclic AMP-responsive element-binding protein 5 isoform X3 [Sus scrofa]	Environmental Information Processing;Human Diseases;Human Diseases;Organismal Systems;Environmental Information Processing;Human Diseases;Human Diseases;Environmental Information Processing;Human Diseases;Human Diseases;Human Diseases;Organismal Systems;Organismal Systems;Organismal Systems;Organismal Systems;Environmental Information Processing;Environmental Information Processing;Human Diseases…	Signal transduction;Infectious diseases;Infectious diseases;Environmental adaptation;Signal transduction;Neurodegenerative diseases;Cancers;Signal transduction;Substance dependence;Infectious diseases;Endocrine and metabolic diseases;Circulatory system;Endocrine system;Endocrine system;Nervous system;Signal transduction;Signal transduction;Cancers;Nervous system;Endocrine and metabolic diseases;E…	ko04151//PI3K-Akt signaling pathway;ko05165//Human papillomavirus infection;ko05163//Human cytomegalovirus infection;ko04714//Thermogenesis;ko04024//cAMP signaling pathway;ko05016//Huntington disease;ko05203//Viral carcinogenesis;ko04022//cGMP - PKG signaling pathway;ko05034//Alcoholism;ko05161//Hepatitis B;ko04934//Cushing syndrome;ko04261//Adrenergic signaling in cardiomyocytes;ko04915//Estroge…	K09047;K09047;K09047;K09047;K09047;K09047;K09047;K09047;K09047;K09047;K09047;K09047;K09047;K09047;K09047;K09047;K09047;K09047;K09047;K09047;K09047;K09047;K09047;K09047;K09047;K09047;K09047;K09047;K09047;K09047	-	-	-
LOC110261337	100	101	97	235	194	179	2.81	2.52	2.37	5.34	4.65	4.41	2.56667	4.8	0.903138	4.7569e-07	9.56454e-06	TIGD1	PREDICTED: tigger transposable element-derived protein 1-like isoform X2 [Balaenoptera acutorostrata scammoni]	-	-	-	-	-	-	-
LOC396703	1775	1942	1944	2821	2448	2460	24.68	22.75	22.97	29.8	27.35	30.09	23.4667	29.08	0.309414	4.78836e-07	9.61178e-06	SON	PREDICTED: protein SON isoform X1 [Sus scrofa]	-	-	-	-	-	-	-
LOC100152852	721	834	786	725	708	656	103.99	101.99	96.91	79.62	82.17	83.51	100.963	81.7667	-0.304247	5.00302e-07	1.00094e-05	PFDN2	PREDICTED: prefoldin subunit 2 [Sus scrofa]	-	-	-	-	-	-	-
LOC100157587	362	376	365	305	295	272	16.91	15.1	14.6	10.92	11.15	11.29	15.5367	11.12	-0.48252	5.027e-07	1.00407e-05	NFYB	nuclear transcription factor Y subunit beta [Sus scrofa]	Human Diseases;Human Diseases;Organismal Systems	Infectious diseases;Infectious diseases;Immune system	ko05166//HTLV-I infection;ko05152//Tuberculosis;ko04612//Antigen processing and presentation	K08065;K08065;K08065	-	-	-
LOC100524685	952	1160	1067	1644	1410	1474	18.35	19.22	17.65	24.06	21.66	24.82	18.4067	23.5133	0.353251	5.05585e-07	1.00816e-05	ADGRL2	PREDICTED: adhesion G protein-coupled receptor L2 isoform X4 [Sus scrofa]	-	-	-	-	-	-	-
LOC100621523	376	473	484	360	385	337	10.13	10.79	11.16	7.34	8.3	7.98	10.6933	7.87333	-0.441665	5.06469e-07	1.00826e-05	Pfn2	profilin 2, isoform CRA_c, partial [Homo sapiens]	Cellular Processes;Environmental Information Processing;Human Diseases;Human Diseases	Cell motility;Signal transduction;Infectious diseases;Infectious diseases	ko04810//Regulation of actin cytoskeleton;ko04015//Rap1 signaling pathway;ko05132//Salmonella infection;ko05131//Shigellosis	K05759;K05759;K05759;K05759	-	-	-
LOC100625791	224	260	211	144	165	165	6.44	6.38	5.59	2.39	3.68	3.45	6.13667	3.17333	-0.951456	5.19611e-07	1.02932e-05	ARNTL2	PREDICTED: aryl hydrocarbon receptor nuclear translocator-like protein 2 isoform X3 [Sus scrofa]	-	-	-	-	-	-	-
LOC100519315	165	147	133	97	98	69	6.28	4.74	4.33	2.81	3	2.32	5.11667	2.71	-0.916911	5.24252e-07	1.03682e-05	PANX2	PREDICTED: pannexin-2 isoform X1 [Sus scrofa]	-	-	-	-	-	-	-
LOC100513606	296	295	292	496	489	473	7.18	5.96	5.9	8.98	9.66	10.19	6.34667	9.61	0.598537	5.53371e-07	1.08727e-05	RBM47	PREDICTED: RNA-binding protein 47 isoform X1 [Sus scrofa]	-	-	-	-	-	-	-
LOC106505672	76	71	63	34	23	33	2.91	2.3	2.06	0.99	0.71	1.11	2.42333	0.936667	-1.37139	5.56161e-07	1.09098e-05	IRAK2	PREDICTED: interleukin-1 receptor-associated kinase-like 2 [Sus scrofa]	Human Diseases;Organismal Systems	Infectious diseases;Nervous system	ko05152//Tuberculosis;ko04722//Neurotrophin signaling pathway	K04731;K04731	-	-	-
LOC100623207	88	115	102	221	207	180	4.77	5.28	4.73	9.12	9.03	8.61	4.92667	8.92	0.856432	5.78404e-07	1.13277e-05	LGI2	leucine-rich repeat LGI family member 2 precursor [Bos taurus]	-	-	-	-	-	-	-
LOC100524478	280	346	301	541	468	507	12.06	12.52	11	17.63	16.05	19.07	11.86	17.5833	0.568105	6.02093e-07	1.17725e-05	CHKA	PREDICTED: choline kinase alpha isoform X1 [Sus scrofa]	Metabolism;Metabolism;Human Diseases	Global and overview maps;Lipid metabolism;Cancers	ko01100//Metabolic pathways;ko00564//Glycerophospholipid metabolism;ko05231//Choline metabolism in cancer	K14156;K14156;K14156	-	-	-
LOC100152069	70	80	98	176	162	195	1.28	1.24	1.53	2.45	2.38	3.15	1.35	2.66	0.978467	6.05361e-07	1.18173e-05	SMAD6	PREDICTED: mothers against decapentaplegic homolog 6 [Sus scrofa]	Environmental Information Processing	Signal transduction	ko04350//TGF-beta signaling pathway	K04677	-	-	-
MSTRG.19505	305	328	331	282	240	227	23.07	21.03	21.4	16.24	14.61	15.15	21.8333	15.3333	-0.509861	6.16981e-07	1.20247e-05	--	PREDICTED: translation initiation factor IF-2-like [Sus scrofa]	-	-	-	-	-	-	-
LOC100155924	342	435	409	333	345	264	13.4	14.45	13.7	9.93	10.88	9.13	13.85	9.98	-0.472774	6.21413e-07	1.20654e-05	RFTN1	PREDICTED: raftlin [Balaenoptera acutorostrata scammoni]	-	-	-	-	-	-	-
LOC100525792	4503	4795	5112	7084	6022	6069	196.02	172.14	189.33	240.23	212.47	225.2	185.83	225.967	0.282127	6.36642e-07	1.23282e-05	GABRP	PREDICTED: gamma-aminobutyric acid receptor subunit pi [Sus scrofa]	Environmental Information Processing;Organismal Systems;Organismal Systems;Human Diseases;Human Diseases	Signaling molecules and interaction;Nervous system;Nervous system;Substance dependence;Substance dependence	ko04080//Neuroactive ligand-receptor interaction;ko04723//Retrograde endocannabinoid signaling;ko04727//GABAergic synapse;ko05032//Morphine addiction;ko05033//Nicotine addiction	K05189;K05189;K05189;K05189;K05189	-	-	-
LOC102161937	382	536	462	746	781	637	27.67	32.92	28.6	41.14	45.52	40.72	29.73	42.46	0.514185	6.61365e-07	1.27864e-05	Ier5l	PREDICTED: LOW QUALITY PROTEIN: immediate early response gene 5-like protein [Sus scrofa]	-	-	-	-	-	-	-
LOC808502	2207	2575	2599	3588	3097	3258	246.26	243.57	247.86	304.78	278.04	320.81	245.897	301.21	0.292717	6.75762e-07	1.3023e-05	MT-ND2	NADH dehydrogenase subunit 2 (mitochondrion) [Sus scrofa]	Metabolism;Organismal Systems;Organismal Systems;Human Diseases;Metabolism	Global and overview maps;Environmental adaptation;Nervous system;Neurodegenerative diseases;Energy metabolism	ko01100//Metabolic pathways;ko04714//Thermogenesis;ko04723//Retrograde endocannabinoid signaling;ko05012//Parkinson disease;ko00190//Oxidative phosphorylation	K03879;K03879;K03879;K03879;K03879	-	-	-
LOC110259312	192	172	222	369	359	316	6.16	4.68	6.1	9.02	9.27	8.95	5.64667	9.08	0.685293	6.82591e-07	1.31336e-05	HAPLN4	PREDICTED: hyaluronan and proteoglycan link protein 4 [Capra hircus]	-	-	-	-	-	-	-
LOC100625354	154	180	193	334	327	273	4.56	4.52	4.88	7.52	7.79	7.13	4.65333	7.48	0.684774	6.98378e-07	1.3416e-05	CRISPLD2	PREDICTED: cysteine-rich secretory protein LCCL domain-containing 2 [Sus scrofa]	-	-	-	-	-	-	-
LOC100516858	201	204	225	365	372	349	8.09	7.21	7.18	10.85	11.34	10.83	7.49333	11.0067	0.554698	7.01739e-07	1.34591e-05	FKRP	PREDICTED: fukutin-related protein [Sus scrofa]	Metabolism;Metabolism	Global and overview maps;Glycan biosynthesis and metabolism	ko01100//Metabolic pathways;ko00515//Mannose type O-glycan biosyntheis	K19873;K19873	-	-	-
LOC397340	498	578	574	477	498	432	17.49	17.98	17.92	13.11	14.91	13.8	17.7967	13.94	-0.352376	7.21933e-07	1.38025e-05	STAT5B	PREDICTED: signal transducer and activator of transcription 5B isoform X1 [Sus scrofa]	Human Diseases;Human Diseases;Human Diseases;Cellular Processes;Environmental Information Processing;Organismal Systems;Human Diseases;Human Diseases;Organismal Systems;Human Diseases;Organismal Systems;Environmental Information Processing;Human Diseases;Organismal Systems;Human Diseases;Human Diseases	Cancers;Infectious diseases;Cancers;Cell growth and death;Signal transduction;Immune system;Infectious diseases;Infectious diseases;Immune system;Endocrine and metabolic diseases;Immune system;Signal transduction;Cancers;Endocrine system;Cancers;Cancers	ko05200//Pathways in cancer;ko05166//HTLV-I infection;ko05203//Viral carcinogenesis;ko04217//Necroptosis;ko04630//Jak-STAT signaling pathway;ko04062//Chemokine signaling pathway;ko05161//Hepatitis B;ko05162//Measles;ko04659//Th17 cell differentiation;ko04933//AGE-RAGE signaling pathway in diabetic complications;ko04658//Th1 and Th2 cell differentiation;ko04012//ErbB signaling pathway;ko05220//Chr…	K11224;K11224;K11224;K11224;K11224;K11224;K11224;K11224;K11224;K11224;K11224;K11224;K11224;K11224;K11224;K11224	-	-	-
LOC100154055	231	308	294	468	485	416	4.88	5.55	5.17	7.47	8.15	7.66	5.2	7.76	0.577545	7.32013e-07	1.39731e-05	SLC45A4	PREDICTED: solute carrier family 45 member 4 isoform X1 [Sus scrofa]	-	-	-	-	-	-	-
LOC100520402	171	179	188	372	306	281	4.45	3.95	4.19	7.38	6.41	6.46	4.19667	6.75	0.685644	7.4386e-07	1.41768e-05	MAP3K14	PREDICTED: mitogen-activated protein kinase kinase kinase 14 [Sus scrofa]	Environmental Information Processing;Human Diseases;Human Diseases;Cellular Processes;Organismal Systems;Environmental Information Processing;Environmental Information Processing;Organismal Systems;Organismal Systems;Human Diseases;Organismal Systems	Signal transduction;Infectious diseases;Infectious diseases;Cell growth and death;Development;Signal transduction;Signal transduction;Immune system;Immune system;Infectious diseases;Immune system	ko04010//MAPK signaling pathway;ko05166//HTLV-I infection;ko05169//Epstein-Barr virus infection;ko04210//Apoptosis;ko04380//Osteoclast differentiation;ko04668//TNF signaling pathway;ko04064//NF-kappa B signaling pathway;ko04625//C-type lectin receptor signaling pathway;ko04660//T cell receptor signaling pathway;ko05120//Epithelial cell signaling in Helicobacter pylori infection;ko04672//Intestina…	K04466;K04466;K04466;K04466;K04466;K04466;K04466;K04466;K04466;K04466;K04466	-	-	-
LOC450248	472	536	512	795	809	697	28.6	29.18	26.89	38.8	41.05	37.38	28.2233	39.0767	0.469419	7.72263e-07	1.46718e-05	P2RY2	P2Y purinoceptor 2 [Sus scrofa]	Environmental Information Processing;Organismal Systems	Signaling molecules and interaction;Sensory system	ko04080//Neuroactive ligand-receptor interaction;ko04750//Inflammatory mediator regulation of TRP channels	K04269;K04269	-	-	-
LOC100524978	7	13	7	45	45	43	0.13	0.16	0.08	0.57	0.65	0.54	0.123333	0.586667	2.24998	8.11293e-07	1.53891e-05	Lfng	PREDICTED: beta-1,3-N-acetylglucosaminyltransferase lunatic fringe isoform X1 [Sus scrofa]	Human Diseases;Environmental Information Processing;Metabolism	Infectious diseases;Signal transduction;Glycan biosynthesis and metabolism	ko05165//Human papillomavirus infection;ko04330//Notch signaling pathway;ko00514//Other types of O-glycan biosynthesis	K05948;K05948;K05948	-	-	-
LOC100738074	311	365	358	573	543	509	5.77	5.74	5.68	8.09	8.1	8.33	5.73	8.17333	0.512389	8.72377e-07	1.64959e-05	ZNF316	PREDICTED: zinc finger protein 316 [Bos taurus]	-	-	-	-	-	-	-
LOC106505387	910	1061	1001	1453	1429	1304	45.18	44.65	42.47	54.91	57.08	57.13	44.1	56.3733	0.354234	8.73885e-07	1.64985e-05	GPRC5C	PREDICTED: G-protein coupled receptor family C group 5 member C, partial [Sus scrofa]	-	-	-	-	-	-	-
LOC100151812	356	385	448	636	606	634	5.8	5.32	6.24	7.89	7.95	9.11	5.78667	8.31667	0.523273	8.7877e-07	1.65648e-05	FLRT2	PREDICTED: leucine-rich repeat transmembrane protein FLRT2 [Sus scrofa]	-	-	-	-	-	-	-
LOC397348	796	828	884	860	688	676	20	16.84	18.76	16.41	13.88	14.73	18.5333	15.0067	-0.304519	8.96499e-07	1.68726e-05	GPD2	PREDICTED: LOW QUALITY PROTEIN: glycerol-3-phosphate dehydrogenase, mitochondrial [Sus scrofa]	Metabolism	Lipid metabolism	ko00564//Glycerophospholipid metabolism	K00111	-	-	-
LOC654327	686	824	744	1234	1065	987	28.79	29.32	26.69	39.43	35.97	36.56	28.2667	37.32	0.400847	9.43957e-07	1.77382e-05	SRSF1	serine/arginine-rich splicing factor 1 isoform 1 [Homo sapiens]	Human Diseases;Genetic Information Processing;Organismal Systems	Infectious diseases;Transcription;Immune system	ko05168//Herpes simplex infection;ko03040//Spliceosome;ko04657//IL-17 signaling pathway	K12890;K12890;K12890	-	-	-
LOC100515940	941	1150	1076	1574	1421	1465	29.76	31.24	30.2	39.33	36.71	40.1	30.4	38.7133	0.348759	1.001e-06	1.87225e-05	DDX3X	PREDICTED: ATP-dependent RNA helicase DDX3X isoform X1 [Sus scrofa]	Human Diseases;Human Diseases;Organismal Systems	Cancers;Infectious diseases;Immune system	ko05203//Viral carcinogenesis;ko05161//Hepatitis B;ko04622//RIG-I-like receptor signaling pathway	K11594;K11594;K11594	-	-	-
LOC110258364	2154	2688	2436	3368	3536	3014	376.03	397.8	363.47	447.61	496.67	464.33	379.1	469.537	0.308659	1.01972e-06	1.90433e-05	CRIP1	cysteine-rich protein 1 [Homo sapiens]	-	-	-	-	-	-	-
LOC100738128	378	405	350	626	622	560	13.94	12.78	11.13	17.57	18.47	18.33	12.6167	18.1233	0.522518	1.07647e-06	2.0041e-05	CCDC97	PREDICTED: coiled-coil domain-containing protein 97 isoform X1 [Sus scrofa]	-	-	-	-	-	-	-
LOC100286811	338	362	452	649	605	568	20.49	18.6	23.42	29.95	29.51	30.38	20.8367	29.9467	0.523271	1.08819e-06	2.02279e-05	Spag6	sperm-associated antigen 6 [Sus scrofa]	-	-	-	-	-	-	-
LOC100623077	252	216	224	152	173	152	11.15	7.27	8.33	4.72	5.68	4.87	8.91667	5.09	-0.808839	1.09635e-06	2.03483e-05	KLHL30	PREDICTED: kelch-like protein 30 [Sus scrofa]	-	-	-	-	-	-	-
LOC102162202	92	99	87	59	48	40	6.2	5.65	5.02	3.02	2.61	2.41	5.62333	2.68	-1.06919	1.10057e-06	2.03953e-05	HIST2H2BE	histone H2B type 2-E [Homo sapiens]	-	-	-	-	-	-	-
LOC100144502	498	598	573	867	857	750	95.55	97.26	93.96	126.63	132.29	126.98	95.59	128.633	0.428333	1.18642e-06	2.18853e-05	RAB1B	ras-related protein Rab-1B [Bos taurus]	Human Diseases	Infectious diseases	ko05134//Legionellosis	K07875	-	-	-
LOC100514943	563	632	572	934	927	786	23.37	22.29	20.26	29.47	31.01	28.85	21.9733	29.7767	0.438429	1.21344e-06	2.22815e-05	NSMF	PREDICTED: NMDA receptor synaptonuclear signaling and neuronal migration factor [Camelus bactrianus]	-	-	-	-	-	-	-
LOC100157287	361	401	444	687	588	594	5.65	5.32	5.94	8.18	7.4	8.2	5.63667	7.92667	0.491872	1.2387e-06	2.27108e-05	PRPF4B	PREDICTED: serine/threonine-protein kinase PRP4 homolog isoform X1 [Balaenoptera acutorostrata scammoni]	-	-	-	-	-	-	-
LOC733621	577	556	617	531	467	487	13.66	11.84	12.96	9.85	8.82	10.61	12.82	9.76	-0.393443	1.40686e-06	2.56379e-05	Foxo3	forkhead box protein O3 [Sus scrofa]	Environmental Information Processing;Organismal Systems;Cellular Processes;Environmental Information Processing;Environmental Information Processing;Organismal Systems;Organismal Systems;Human Diseases;Organismal Systems;Human Diseases;Cellular Processes;Organismal Systems;Human Diseases	Signal transduction;Immune system;Cell growth and death;Signal transduction;Signal transduction;Nervous system;Aging;Drug resistance;Endocrine system;Cancers;Transport and catabolism;Aging;Cancers	ko04151//PI3K-Akt signaling pathway;ko04062//Chemokine signaling pathway;ko04218//Cellular senescence;ko04068//FoxO signaling pathway;ko04152//AMPK signaling pathway;ko04722//Neurotrophin signaling pathway;ko04211//Longevity regulating pathway - mammal;ko01521//EGFR tyrosine kinase inhibitor resistance;ko04917//Prolactin signaling pathway;ko05223//Non-small cell lung cancer;ko04137//Mitophagy - a…	K09408;K09408;K09408;K09408;K09408;K09408;K09408;K09408;K09408;K09408;K09408;K09408;K09408	-	-	-
LOC100511875	266	286	310	486	501	414	24.26	22.11	24.16	33.74	36.76	33.32	23.51	34.6067	0.557775	1.43829e-06	2.61712e-05	EXOSC4	PREDICTED: exosome complex component RRP41 [Sus scrofa]	Genetic Information Processing	Folding, sorting and degradation	ko03018//RNA degradation	K11600	-	-	-
LOC100153907	460	554	517	772	824	715	14.06	14.35	13.5	17.96	20.26	19.28	13.97	19.1667	0.456267	1.44563e-06	2.62443e-05	FOXP4	PREDICTED: forkhead box protein P4 isoform X1 [Sus scrofa]	Human Diseases	Cancers	ko05206//MicroRNAs in cancer	K09409	-	-	-
LOC100515942	587	702	640	961	1001	879	21.86	22.2	20.3	27.18	29.98	29.48	21.4533	28.88	0.428869	1.44666e-06	2.62443e-05	ARHGAP1	PREDICTED: rho GTPase-activating protein 1 isoform X1 [Sus scrofa]	-	-	-	-	-	-	-
LOC493186	94	81	96	176	195	190	7.03	3.5	5.5	8.07	11.36	11.39	5.34333	10.2733	0.943092	1.46273e-06	2.6496e-05	SOCS3	suppressor of cytokine signaling 3 [Sus scrofa]	Human Diseases;Human Diseases;Environmental Information Processing;Human Diseases;Human Diseases;Genetic Information Processing;Organismal Systems;Organismal Systems;Environmental Information Processing;Human Diseases;Organismal Systems;Organismal Systems;Human Diseases	Infectious diseases;Infectious diseases;Signal transduction;Endocrine and metabolic diseases;Infectious diseases;Folding, sorting and degradation;Endocrine system;Development;Signal transduction;Endocrine and metabolic diseases;Endocrine system;Endocrine system;Endocrine and metabolic diseases	ko05168//Herpes simplex infection;ko05164//Influenza A;ko04630//Jak-STAT signaling pathway;ko04932//Non-alcoholic fatty liver disease (NAFLD);ko05160//Hepatitis C;ko04120//Ubiquitin mediated proteolysis;ko04910//Insulin signaling pathway;ko04380//Osteoclast differentiation;ko04668//TNF signaling pathway;ko04931//Insulin resistance;ko04920//Adipocytokine signaling pathway;ko04917//Prolactin signal…	K04696;K04696;K04696;K04696;K04696;K04696;K04696;K04696;K04696;K04696;K04696;K04696;K04696	-	-	-
LOC808512	430	568	492	792	724	747	94.69	106.03	92.6	132.77	128.27	145.16	97.7733	135.4	0.469715	1.52324e-06	2.75096e-05	MT-ND6	NADH dehydrogenase subunit 6 (mitochondrion) [Sus scrofa]	Metabolism;Organismal Systems;Organismal Systems;Human Diseases;Metabolism	Global and overview maps;Environmental adaptation;Nervous system;Neurodegenerative diseases;Energy metabolism	ko01100//Metabolic pathways;ko04714//Thermogenesis;ko04723//Retrograde endocannabinoid signaling;ko05012//Parkinson disease;ko00190//Oxidative phosphorylation	K03884;K03884;K03884;K03884;K03884	-	-	-
LOC100510887	278	288	327	506	475	455	6.76	5.94	6.8	9.37	9.3	9.77	6.5	9.48	0.544447	1.54547e-06	2.78693e-05	PRRT1B	PREDICTED: leucine-rich repeat extensin-like protein 2 [Sus scrofa]	-	-	-	-	-	-	-
LOC100322893	569	664	675	568	553	552	68.91	68.17	69.87	52.37	53.89	59	68.9833	55.0867	-0.324545	1.55606e-06	2.80184e-05	Map1lc3a	microtubule-associated proteins 1A/1B light chain 3A [Sus scrofa]	Cellular Processes	Cell growth and death	ko04216//Ferroptosis	K10435	-	-	-
LOC106504106	1111	1339	1364	1815	1723	1705	18.8	19.19	19.75	23.36	23.46	25.43	19.2467	24.0833	0.323426	1.75119e-06	3.13447e-05	DCBLD2	PREDICTED: discoidin, CUB and LCCL domain-containing protein 2 [Camelus dromedarius]	-	-	-	-	-	-	-
LOC100624579	1987	2351	2315	3101	3035	2681	26.34	26.42	26.22	31.29	32.36	31.36	26.3267	31.67	0.266592	1.77968e-06	3.18074e-05	PLXNA1	PREDICTED: plexin-A1 [Sus scrofa]	Organismal Systems	Development	ko04360//Axon guidance	K06820	-	-	-
LOC493185	372	391	473	354	357	285	25.26	22.65	27.71	18.36	19.43	17.07	25.2067	18.2867	-0.463013	1.79114e-06	3.1965e-05	IFRD1	interferon-related developmental regulator 1 [Sus scrofa]	-	-	-	-	-	-	-
LOC100515296	406	499	490	452	362	354	30.55	31.74	31.48	25.87	21.88	23.51	31.2567	23.7533	-0.396034	1.85174e-06	3.29121e-05	SLC22A18	PREDICTED: solute carrier family 22 member 18 isoform X2 [Vicugna pacos]	-	-	-	-	GO:0005886//plasma membrane;GO:0012505//endomembrane system;GO:0031224//intrinsic component of membrane;GO:0044424//intracellular part	GO:0022857//transmembrane transporter activity;GO:0044389//ubiquitin-like protein ligase binding	GO:0015893//drug transport;GO:0044763//single-organism cellular process
LOC100517877	449	464	460	758	671	667	10.58	9.27	9.26	13.59	12.71	13.86	9.70333	13.3867	0.464244	1.85239e-06	3.29121e-05	LTBP3	PREDICTED: latent-transforming growth factor beta-binding protein 3 isoform X1 [Ceratotherium simum simum]	-	-	-	-	-	-	-
LOC595129	325	395	369	571	594	533	31.97	32.94	31.02	42.76	47.01	46.27	31.9767	45.3467	0.503977	1.88336e-06	3.34131e-05	FADD	protein FADD [Sus scrofa]	Human Diseases;Human Diseases;Human Diseases;Human Diseases;Human Diseases;Human Diseases;Cellular Processes;Human Diseases;Organismal Systems;Human Diseases;Cellular Processes;Organismal Systems;Environmental Information Processing;Human Diseases;Organismal Systems;Organismal Systems;Human Diseases;Cellular Processes	Cancers;Infectious diseases;Infectious diseases;Infectious diseases;Infectious diseases;Infectious diseases;Cell growth and death;Neurodegenerative diseases;Immune system;Infectious diseases;Cell growth and death;Immune system;Signal transduction;Infectious diseases;Immune system;Immune system;Drug resistance;Cell growth and death	ko05200//Pathways in cancer;ko05165//Human papillomavirus infection;ko05163//Human cytomegalovirus infection;ko05168//Herpes simplex infection;ko05167//Kaposi sarcoma-associated herpesvirus infection;ko05152//Tuberculosis;ko04217//Necroptosis;ko05010//Alzheimer disease;ko04621//NOD-like receptor signaling pathway;ko05161//Hepatitis B;ko04210//Apoptosis;ko04620//Toll-like receptor signaling pathwa…	K02373;K02373;K02373;K02373;K02373;K02373;K02373;K02373;K02373;K02373;K02373;K02373;K02373;K02373;K02373;K02373;K02373;K02373	-	-	-
LOC100154475	746	859	810	1223	1149	1064	8.15	7.95	7.56	10.17	10.1	10.25	7.88667	10.1733	0.367305	1.89106e-06	3.35004e-05	TNKS1BP1	PREDICTED: uncharacterized protein KIAA1671 homolog [Sus scrofa]	-	-	-	-	-	-	-
MSTRG.15657	28	30	27	5	6	7	2.6	2.32	2.11	0.35	0.45	0.58	2.34333	0.46	-2.34886	1.8966e-06	3.35493e-05	--	-	-	-	-	-	-	-	-
LOC100521440	160	157	209	302	331	313	5.2	4.36	5.85	7.54	8.71	9.02	5.13667	8.42333	0.713559	1.97213e-06	3.47834e-05	ORAI2	PREDICTED: protein orai-2 [Sus scrofa]	Environmental Information Processing	Signal transduction	ko04020//Calcium signaling pathway	K16057	-	-	-
LOC100518769	377	444	424	375	353	308	22.53	22.19	20.09	16.04	16.16	15.52	21.6033	15.9067	-0.441622	1.97701e-06	3.48184e-05	SLC25A23	PREDICTED: calcium-binding mitochondrial carrier protein SCaMC-3 [Camelus bactrianus]	-	-	-	-	-	-	-
LOC396964	515	590	617	487	530	466	19.31	18.66	19.62	13.77	15.93	15.4	19.1967	15.0333	-0.352691	2.10764e-06	3.70111e-05	CD97	PREDICTED: CD97 antigen isoform X3 [Physeter catodon]	-	-	-	-	-	-	-
LOC414917	491	542	606	523	456	434	67.88	63.52	71.61	55.04	50.72	52.95	67.67	52.9033	-0.355158	2.13214e-06	3.73325e-05	RNF114	E3 ubiquitin-protein ligase RNF114 [Sus scrofa]	-	-	-	-	-	-	-
LOC106504051	267	328	327	508	488	461	10.39	10.82	10.87	15.04	15.27	15.82	10.6933	15.3767	0.524031	2.17596e-06	3.78798e-05	NOP14	PREDICTED: nucleolar protein 14 [Lipotes vexillifer]	-	-	-	-	-	-	-
LOC100737886	654	685	707	689	586	534	73.49	65.25	67.9	58.95	52.99	52.96	68.88	54.9667	-0.325528	2.26565e-06	3.93278e-05	VPS29	vacuolar protein sorting-associated protein 29 [Bos taurus]	Cellular Processes	Transport and catabolism	ko04144//Endocytosis	K18467	-	-	-
LOC100511385	844	959	1001	1470	1302	1176	28.93	27.75	29.27	38.2	35.85	35.48	28.65	36.51	0.349757	2.34438e-06	4.05195e-05	MIB2	PREDICTED: E3 ubiquitin-protein ligase MIB2 isoform X1 [Sus scrofa]	-	-	-	-	-	-	-
LOC100738372	225	289	260	211	193	183	9.05	10.09	8.9	6.4	6.19	6.44	9.34667	6.34333	-0.559211	2.40627e-06	4.15296e-05	CDC42EP1	PREDICTED: cdc42 effector protein 1 [Sus scrofa]	-	-	-	-	-	-	-
LOC397020	601	666	641	975	968	844	34.49	32.4	31.42	42.59	44.7	42.77	32.77	43.3533	0.403767	2.43646e-06	4.19907e-05	TNFRSF1A	tumor necrosis factor receptor superfamily member 1A precursor [Sus scrofa]	Human Diseases;Environmental Information Processing;Environmental Information Processing;Human Diseases;Human Diseases;Human Diseases;Human Diseases;Human Diseases;Human Diseases;Cellular Processes;Human Diseases;Human Diseases;Environmental Information Processing;Human Diseases;Human Diseases;Cellular Processes;Organismal Systems;Environmental Information Processing;Human Diseases;Environmental …	Infectious diseases;Signal transduction;Signaling molecules and interaction;Infectious diseases;Infectious diseases;Infectious diseases;Infectious diseases;Infectious diseases;Infectious diseases;Cell growth and death;Neurodegenerative diseases;Endocrine and metabolic diseases;Signal transduction;Cardiovascular diseases;Infectious diseases;Cell growth and death;Development;Signal transduction;Inf…	ko05165//Human papillomavirus infection;ko04010//MAPK signaling pathway;ko04060//Cytokine-cytokine receptor interaction;ko05166//HTLV-I infection;ko05163//Human cytomegalovirus infection;ko05168//Herpes simplex infection;ko05167//Kaposi sarcoma-associated herpesvirus infection;ko05152//Tuberculosis;ko05164//Influenza A;ko04217//Necroptosis;ko05010//Alzheimer disease;ko04932//Non-alcoholic fatty l…	K03158;K03158;K03158;K03158;K03158;K03158;K03158;K03158;K03158;K03158;K03158;K03158;K03158;K03158;K03158;K03158;K03158;K03158;K03158;K03158;K03158;K03158;K03158;K03158;K03158;K03158	-	-	-
LOC100627907	64	84	70	175	159	129	2.63	2.91	1.98	5.27	4.95	4.6	2.50667	4.94	0.978741	2.49331e-06	4.2787e-05	DTNA	PREDICTED: dystrobrevin alpha isoform X4 [Bos taurus]	-	-	-	-	-	-	-
LOC100154373	100	120	112	203	202	244	4.96	5.04	4.75	7.68	8.07	10.7	4.91667	8.81667	0.842553	2.8477e-06	4.84551e-05	VSIR	PREDICTED: platelet receptor Gi24 isoform X1 [Sus scrofa]	-	-	-	-	-	-	-
LOC100522677	628	739	729	1077	1004	917	35.05	34.97	34.78	45.76	45.09	45.17	34.9333	45.34	0.37618	2.8607e-06	4.86077e-05	E2F4	PREDICTED: transcription factor E2F4 [Sus scrofa]	Cellular Processes;Cellular Processes;Environmental Information Processing	Cell growth and death;Cell growth and death;Signal transduction	ko04218//Cellular senescence;ko04110//Cell cycle;ko04350//TGF-beta signaling pathway	K04682;K04682;K04682	-	-	-
MSTRG.19639	190	251	247	167	153	177	15.12	16.93	16.8	10.12	9.8	12.43	16.2833	10.7833	-0.594593	2.87069e-06	4.86914e-05	--	IL-23, partial [Sus scrofa]	-	-	-	-	-	-	-
LOC100524286	303	275	289	491	479	453	4.6	3.54	3.75	5.67	5.85	6.06	3.96333	5.86	0.564186	2.87369e-06	4.86914e-05	SH3PXD2B	PREDICTED: LOW QUALITY PROTEIN: SH3 and PX domain-containing protein 2B [Sus scrofa]	-	-	-	-	-	-	-
LOC100524459	333	397	333	590	525	579	21.81	22.04	18.64	29.42	27.67	33.47	20.83	30.1867	0.535249	2.89426e-06	4.89711e-05	SLC25A20	PREDICTED: mitochondrial carnitine/acylcarnitine carrier protein [Sus scrofa]	Organismal Systems	Environmental adaptation	ko04714//Thermogenesis	K15109	-	-	-
LOC100516018	239	238	261	180	205	161	21.34	18.02	19.92	12.24	14.73	12.69	19.76	13.22	-0.579861	3.07666e-06	5.19844e-05	FAM98C	PREDICTED: protein FAM98C isoform X2 [Sus scrofa]	-	-	-	-	-	-	-
LOC110260610	983	1197	1136	1697	1578	1343	23.28	24.03	22.99	30.59	30.06	28.07	23.4333	29.5733	0.335735	3.29053e-06	5.53653e-05	Celsr1	PREDICTED: cadherin EGF LAG seven-pass G-type receptor 1 [Tursiops truncatus]	-	-	-	-	-	-	-
LOC100156193	380	461	488	414	375	330	22.73	21.95	24.12	14.75	18.74	16.24	22.9333	16.5767	-0.468292	3.35841e-06	5.63503e-05	LGALS8	PREDICTED: galectin-8 isoform X1 [Sus scrofa]	-	-	-	-	-	-	-
LOC397488	60	73	71	178	125	138	2.54	2.66	2.43	6.08	4.47	5.24	2.54333	5.26333	1.04926	3.38057e-06	5.66433e-05	GHR	growth hormone receptor precursor [Sus scrofa]	Environmental Information Processing;Environmental Information Processing;Environmental Information Processing;Environmental Information Processing	Signal transduction;Signaling molecules and interaction;Signaling molecules and interaction;Signal transduction	ko04151//PI3K-Akt signaling pathway;ko04060//Cytokine-cytokine receptor interaction;ko04080//Neuroactive ligand-receptor interaction;ko04630//Jak-STAT signaling pathway	K05080;K05080;K05080;K05080	-	-	-
LOC100621118	485	611	599	558	488	430	33.7	36.37	35.67	29.83	27.23	26.34	35.2467	27.8	-0.342402	3.56795e-06	5.95349e-05	ABHD14B	PREDICTED: alpha/beta hydrolase domain-containing protein 14B [Sus scrofa]	-	-	-	-	-	-	-
LOC100520511	272	330	279	469	505	449	15.39	15.82	13.57	20.32	23.22	22.43	14.9267	21.99	0.558956	3.574e-06	5.95535e-05	PSPC1	PREDICTED: paraspeckle component 1 [Sus scrofa]	-	-	-	-	-	-	-
LOC100519207	237	234	289	447	398	409	4.02	3.2	3.84	5.01	5.15	5.52	3.68667	5.22667	0.503574	3.5942e-06	5.98075e-05	SNX19	PREDICTED: sorting nexin-19 isoform X1 [Sus scrofa]	-	-	-	-	-	-	-
LOC100524723	857	970	1034	1001	878	752	63.22	60.66	65.2	56.22	52.12	48.96	63.0267	52.4333	-0.265478	3.63069e-06	6.03314e-05	CHAC1	PREDICTED: glutathione-specific gamma-glutamylcyclotransferase 1 [Sus scrofa]	Metabolism;Metabolism	Global and overview maps;Metabolism of other amino acids	ko01100//Metabolic pathways;ko00480//Glutathione metabolism	K07232;K07232	-	-	-
LOC100624468	393	529	535	419	426	382	28.08	32.04	32.7	22.78	24.49	24.09	30.94	23.7867	-0.37932	3.74256e-06	6.21049e-05	OSER1	PREDICTED: oxidative stress-responsive serine-rich protein 1 [Sus scrofa]	-	-	-	-	-	-	-
LOC100153064	905	1094	1096	1539	1458	1286	71.25	72.41	71.53	88.3	88.84	88.12	71.73	88.42	0.301796	3.77488e-06	6.2489e-05	Chtop	PREDICTED: chromatin target of PRMT1 protein isoform X1 [Equus caballus]	-	-	-	-	-	-	-
LOC100739697	605	753	737	695	595	591	14.85	15.67	15.46	12.99	11.75	12.8	15.3267	12.5133	-0.292578	3.77606e-06	6.2489e-05	CNNM4	PREDICTED: metal transporter CNNM4, partial [Ailuropoda melanoleuca]	-	-	-	-	-	-	-
LOC397182	392	427	437	684	641	576	47.13	43.52	44.91	62.61	62.01	61.12	45.1867	61.9133	0.454353	3.80234e-06	6.28375e-05	IGFBP5	insulin-like growth factor-binding protein 5 precursor [Sus scrofa]	-	-	-	-	-	-	-
LOC100616094	331	422	355	612	595	516	9.21	9.96	8.44	12.97	13.32	12.67	9.20333	12.9867	0.496803	3.87442e-06	6.38538e-05	Dgcr8	microprocessor complex subunit DGCR8 [Sus scrofa]	-	-	-	-	-	-	-
LOC100154492	398	493	515	393	344	414	20.62	21.6	22.93	15.32	14.34	19.03	21.7167	16.23	-0.42014	3.89001e-06	6.40233e-05	RSRC2	PREDICTED: arginine/serine-rich coiled-coil protein 2 isoform X1 [Sus scrofa]	-	-	-	-	-	-	-
LOC100157427	91	118	115	216	201	194	0.38	0.42	0.41	0.69	0.68	0.72	0.403333	0.696667	0.788496	3.8966e-06	6.40445e-05	SYNE1	PREDICTED: nesprin-1 isoform X2 [Vicugna pacos]	-	-	-	-	-	-	-
LOC100520193	181	253	259	441	388	331	3.79	4.49	4.63	7.03	6.54	6.12	4.30333	6.56333	0.608974	3.93422e-06	6.4487e-05	Rtl6	PREDICTED: protein LDOC1L [Sus scrofa]	-	-	-	-	-	-	-
LOC110256291	916	1104	979	1542	1461	1237	26.51	27.09	24.2	33.97	34.02	31.59	25.9333	33.1933	0.356086	4.13393e-06	6.74853e-05	Rab43	PREDICTED: ras-related protein Rab-43 [Camelus bactrianus]	-	-	-	-	-	-	-
LOC100137084	336	362	389	619	524	541	10.31	9.39	10.17	14.41	12.92	14.65	9.95667	13.9933	0.491005	4.26058e-06	6.9459e-05	LIMA1	LIM domain and actin-binding protein 1 [Sus scrofa]	-	-	-	-	-	-	-
LOC100154117	1121	1199	1311	1745	1757	1528	47.61	44.01	47.57	56.18	60.25	57.77	46.3967	58.0667	0.323689	4.33818e-06	7.06286e-05	M6PR	PREDICTED: cation-dependent mannose-6-phosphate receptor [Sus scrofa]	Cellular Processes;Cellular Processes	Transport and catabolism;Transport and catabolism	ko04145//Phagosome;ko04142//Lysosome	K10089;K10089	-	-	-
LOC100523493	849	1030	921	1370	1366	1207	31.61	32.51	29.31	38.83	40.92	39.65	31.1433	39.8	0.353845	4.37728e-06	7.11691e-05	CKAP4	cytoskeleton-associated protein 4 [Sus scrofa]	Genetic Information Processing	Folding, sorting and degradation	ko04141//Protein processing in endoplasmic reticulum	K13999	-	-	-
LOC100622994	821	907	931	1380	1266	1102	36.47	34.16	35.35	46.67	45.25	43.21	35.3267	45.0433	0.350556	4.51567e-06	7.33204e-05	MAZ	PREDICTED: myc-associated zinc finger protein isoform X1 [Sus scrofa]	-	-	-	-	-	-	-
LOC100519313	579	688	677	1038	970	813	8.14	8.19	8.13	11.1	10.96	10.08	8.15333	10.7133	0.393946	4.54427e-06	7.36855e-05	Ankrd52	PREDICTED: serine/threonine-protein phosphatase 6 regulatory ankyrin repeat subunit C [Cavia porcellus]	-	-	-	-	-	-	-
LOC100516578	203	239	248	212	154	138	3.44	3.43	3.59	2.73	2.1	2.06	3.48667	2.29667	-0.602307	4.58216e-06	7.42002e-05	CCDC80	PREDICTED: coiled-coil domain-containing protein 80 [Sus scrofa]	-	-	-	-	-	-	-
LOC396862	779	1036	890	867	853	736	126.5	142.61	123.52	107.18	111.45	105.47	130.877	108.033	-0.276731	4.82406e-06	7.79082e-05	TIMP1	RecName: Full=Metalloproteinase inhibitor 1; AltName: Full=Tissue inhibitor of metalloproteinases 1; Short=TIMP-1; Flags: Precursor	Environmental Information Processing	Signal transduction	ko04066//HIF-1 signaling pathway	K16451	-	-	-
LOC100518772	145	171	152	328	230	301	4.44	4.45	4	7.66	5.68	8.15	4.29667	7.16333	0.737413	4.84976e-06	7.82186e-05	AKAP8	PREDICTED: A-kinase anchor protein 8 isoform X1 [Sus scrofa]	-	-	-	-	-	-	-
LOC110259876	50	75	69	158	129	129	3.23	4.06	3.79	7.72	6.66	7.28	3.69333	7.22	0.967075	4.94704e-06	7.94688e-05	CNPY4	PREDICTED: protein canopy homolog 4 [Leptonychotes weddellii]	-	-	-	-	-	-	-
LOC100622853	77	100	109	192	175	190	2.78	3.11	3.43	5.83	5.58	6.53	3.10667	5.98	0.944778	5.00685e-06	8.02786e-05	Ccdc114	PREDICTED: coiled-coil domain-containing protein 114 isoform X1 [Sus scrofa]	-	-	-	-	-	-	-
LOC100737254	44	75	68	154	148	111	1.85	2.65	2.42	5.1	4.96	4.08	2.30667	4.71333	1.03094	5.01076e-06	8.02786e-05	PMM2	PREDICTED: phosphomannomutase 2 [Sus scrofa]	Metabolism;Metabolism;Metabolism	Global and overview maps;Carbohydrate metabolism;Carbohydrate metabolism	ko01100//Metabolic pathways;ko00520//Amino sugar and nucleotide sugar metabolism;ko00051//Fructose and mannose metabolism	K17497;K17497;K17497	-	-	-
LOC100516268	80	87	84	50	47	40	3.95	3.64	3.55	1.88	1.87	1.74	3.71333	1.83	-1.02087	5.22021e-06	8.32117e-05	WNT5B	PREDICTED: protein Wnt-5b [Trichechus manatus latirostris]	Human Diseases;Human Diseases;Human Diseases;Human Diseases;Organismal Systems;Human Diseases;Human Diseases;Environmental Information Processing;Environmental Information Processing;Human Diseases;Human Diseases;Cellular Processes;Environmental Information Processing;Organismal Systems;Human Diseases	Cancers;Infectious diseases;Infectious diseases;Cancers;Development;Cancers;Endocrine and metabolic diseases;Signal transduction;Signal transduction;Cancers;Cancers;Cellular community - eukaryotes;Signal transduction;Endocrine system;Cancers	ko05200//Pathways in cancer;ko05165//Human papillomavirus infection;ko05166//HTLV-I infection;ko05205//Proteoglycans in cancer;ko04360//Axon guidance;ko05225//Hepatocellular carcinoma;ko04934//Cushing syndrome;ko04390//Hippo signaling pathway;ko04150//mTOR signaling pathway;ko05226//Gastric cancer;ko05224//Breast cancer;ko04550//Signaling pathways regulating pluripotency of stem cells;ko04310//Wn…	K00444;K00444;K00444;K00444;K00444;K00444;K00444;K00444;K00444;K00444;K00444;K00444;K00444;K00444;K00444	-	-	-
LOC106508594	396	480	466	730	649	623	23.6	24.25	23.7	33.1	31.09	32.75	23.85	32.3133	0.43814	5.25154e-06	8.35812e-05	SLC25A10	PREDICTED: mitochondrial dicarboxylate carrier [Capra hircus]	Organismal Systems	Excretory system	ko04964//Proximal tubule bicarbonate reclamation	K13577	-	-	-
LOC396774	164	207	206	319	339	318	3.29	3.52	3.53	4.87	5.47	5.63	3.44667	5.32333	0.627128	5.31451e-06	8.4472e-05	TIMP4	PREDICTED: metalloproteinase inhibitor 4, partial [Sus scrofa]	-	-	-	-	-	-	-
LOC100628018	188	247	236	382	358	364	7.32	8.16	7.86	11.33	11.22	12.51	7.78	11.6867	0.587021	5.36463e-06	8.51564e-05	SLC46A1	solute carrier family 46, member 1 [Sus scrofa]	Organismal Systems;Human Diseases;Organismal Systems	Digestive system;Drug resistance;Digestive system	ko04978//Mineral absorption;ko01523//Antifolate resistance;ko04977//Vitamin digestion and absorption	K14613;K14613;K14613	-	-	-
LOC100511265	1715	2140	2034	2866	2689	2320	57.8	61.39	58.49	73.63	73.12	68.93	59.2267	71.8933	0.279611	5.37553e-06	8.51621e-05	Map7d1	PREDICTED: MAP7 domain-containing protein 1 isoform X1 [Sus scrofa]	-	-	-	-	-	-	-
LOC100525194	173	207	151	339	304	293	8.11	7.77	5.89	12.11	11.53	11.92	7.25667	11.8533	0.707914	5.42641e-06	8.56861e-05	ZDHHC14	PREDICTED: probable palmitoyltransferase ZDHHC14 isoform X2 [Camelus bactrianus]	-	-	-	-	-	-	-
LOC100625088	764	901	869	1223	1266	1091	18.17	18.15	17.67	22.13	24.21	22.89	17.9967	23.0767	0.358705	5.43888e-06	8.57709e-05	Tnks1bp1	PREDICTED: 182 kDa tankyrase-1-binding protein [Sus scrofa]	-	-	-	-	-	-	-
LOC100621470	161	191	212	155	132	114	2.71	2.73	3.05	1.99	1.79	1.7	2.83	1.82667	-0.631589	5.47174e-06	8.5952e-05	CGNL1	PREDICTED: cingulin-like protein 1-like [Physeter catodon]	Cellular Processes	Cellular community - eukaryotes	ko04530//Tight junction	K21110	-	-	-
LOC100511132	142	146	147	112	88	89	4.03	3.58	3.5	2.01	2.05	2.3	3.70333	2.12	-0.80476	5.48607e-06	8.60649e-05	BICD1	PREDICTED: protein bicaudal D homolog 1 isoform X1 [Sus scrofa]	-	-	-	-	-	-	-
LOC100516080	555	615	647	885	934	831	24.04	22.6	23.94	29.21	32.57	31.75	23.5267	31.1767	0.40617	5.91114e-06	9.24929e-05	NOP2	PREDICTED: probable 28S rRNA (cytosine(4447)-C(5))-methyltransferase isoform X1 [Sus scrofa]	-	-	-	-	-	-	-
LOC100519837	588	662	661	1005	858	911	7.86	7.5	7.56	10.22	9.23	10.74	7.64	10.0633	0.397464	6.16871e-06	9.6149e-05	NUP50	PREDICTED: nuclear pore complex protein Nup50 [Sus scrofa]	Genetic Information Processing	Translation	ko03013//RNA transport	K14295	-	-	-
LOC100155589	263	251	260	221	185	185	10.39	8.34	8.4	6.58	5.41	6.52	9.04333	6.17	-0.551584	6.17743e-06	9.61606e-05	FAM177A1	protein FAM177A1 [Sus scrofa]	-	-	-	-	-	-	-
LOC100520655	274	310	312	491	466	446	4.52	4.11	4.13	5.63	5.95	6.48	4.25333	6.02	0.50117	6.26874e-06	9.74563e-05	TP53BP1	PREDICTED: tumor suppressor p53-binding protein 1 isoform X1 [Lipotes vexillifer]	Organismal Systems	Immune system	ko04621//NOD-like receptor signaling pathway	K20915	-	-	-
LOC100522703	572	673	699	963	946	876	16.26	16.22	16.99	20.85	21.64	21.98	16.49	21.49	0.382074	6.34644e-06	9.85373e-05	Wdr82	WD repeat-containing protein 82 [Homo sapiens]	Genetic Information Processing	Translation	ko03015//mRNA surveillance pathway	K14962	-	-	-
LOC100517711	298	355	327	295	268	232	8.71	8.8	8.15	6.54	6.27	5.93	8.55333	6.24667	-0.4534	6.60454e-06	0.000102019	RFX5	PREDICTED: DNA-binding protein RFX5 isoform X1 [Sus scrofa]	Human Diseases;Organismal Systems;Human Diseases	Infectious diseases;Immune system;Immune diseases	ko05152//Tuberculosis;ko04612//Antigen processing and presentation;ko05340//Primary immunodeficiency	K08061;K08061;K08061	-	-	-
LOC100188980	219	236	216	153	165	173	13.3	11.88	9.36	6.14	7.7	7.77	11.5133	7.20333	-0.676569	7.43905e-06	0.000114325	PGAM2	phosphoglycerate mutase 2 [Sus scrofa]	Metabolism;Metabolism;Organismal Systems;Metabolism;Human Diseases;Metabolism;Metabolism	Global and overview maps;Global and overview maps;Endocrine system;Global and overview maps;Cancers;Carbohydrate metabolism;Amino acid metabolism	ko01100//Metabolic pathways;ko01200//Carbon metabolism;ko04922//Glucagon signaling pathway;ko01230//Biosynthesis of amino acids;ko05230//Central carbon metabolism in cancer;ko00010//Glycolysis / Gluconeogenesis;ko00260//Glycine, serine and threonine metabolism	K01834;K01834;K01834;K01834;K01834;K01834;K01834	-	-	-
LOC100627312	330	375	387	295	309	295	13.41	12.92	13.44	9.13	10.1	10.58	13.2567	9.93667	-0.415884	7.56205e-06	0.000116067	NUMBL	PREDICTED: LOW QUALITY PROTEIN: numb-like protein [Sus scrofa]	Environmental Information Processing	Signal transduction	ko04330//Notch signaling pathway	K06057	-	-	-
LOC100522621	408	510	433	730	706	603	25.1	26.65	22.8	34.24	34.91	32.79	24.85	33.98	0.45144	7.6553e-06	0.0001172	PTOV1	PREDICTED: prostate tumor-overexpressed gene 1 protein [Sus scrofa]	-	-	-	-	-	-	-
LOC100520948	52	77	65	157	118	141	3.62	4.54	3.86	8.31	6.6	8.65	4.00667	7.85333	0.970903	7.99198e-06	0.000122045	CTXN1	cortexin-1 [Homo sapiens]	-	-	-	-	-	-	-
LOC100522421	191	206	233	348	368	330	11.05	9.8	11.6	15.42	17.25	16.88	10.8167	16.5167	0.610667	8.03367e-06	0.000122526	Aldh3b2	PREDICTED: LOW QUALITY PROTEIN: aldehyde dehydrogenase family 3 member B2-like [Sus scrofa]	Metabolism;Human Diseases;Metabolism;Metabolism;Metabolism;Metabolism;Metabolism;Metabolism;Metabolism	Global and overview maps;Cancers;Carbohydrate metabolism;Xenobiotics biodegradation and metabolism;Xenobiotics biodegradation and metabolism;Amino acid metabolism;Metabolism of other amino acids;Amino acid metabolism;Amino acid metabolism	ko01100//Metabolic pathways;ko05204//Chemical carcinogenesis;ko00010//Glycolysis / Gluconeogenesis;ko00980//Metabolism of xenobiotics by cytochrome P450;ko00982//Drug metabolism - cytochrome P450;ko00350//Tyrosine metabolism;ko00410//beta-Alanine metabolism;ko00340//Histidine metabolism;ko00360//Phenylalanine metabolism	K00129;K00129;K00129;K00129;K00129;K00129;K00129;K00129;K00129	-	-	-
LOC100522887	564	648	655	583	541	548	24.13	23.5	23.95	18.99	18.62	20.69	23.86	19.4333	-0.296061	8.1438e-06	0.000124049	CASP13	PREDICTED: caspase-13 isoform X1 [Sus scrofa]	Organismal Systems	Immune system	ko04621//NOD-like receptor signaling pathway	K04394	-	-	-
LOC100270817	1097	1194	1264	1761	1574	1523	39.96	36.87	39.35	48.83	46.13	48.95	38.7267	47.97	0.308805	8.47535e-06	0.000128936	VWA7	von Willebrand factor A domain-containing protein 7 precursor [Sus scrofa]	-	-	-	-	-	-	-
MSTRG.1251	44	28	46	16	14	9	3.52	1.93	3.14	1	0.91	0.64	2.86333	0.85	-1.75216	8.52712e-06	0.000129561	--	-	-	-	-	-	-	-	-
LOC102166564	37	39	46	105	89	99	0.77	0.69	0.82	1.66	1.49	1.85	0.76	1.66667	1.13289	8.64791e-06	0.000131066	PDGFRB	PREDICTED: platelet-derived growth factor receptor beta [Orcinus orca]	Human Diseases;Environmental Information Processing;Human Diseases;Environmental Information Processing;Human Diseases;Environmental Information Processing;Cellular Processes;Environmental Information Processing;Cellular Processes;Environmental Information Processing;Environmental Information Processing;Human Diseases;Environmental Information Processing;Human Diseases;Human Diseases;Cellular Pro…	Cancers;Signal transduction;Infectious diseases;Signal transduction;Infectious diseases;Signal transduction;Cell motility;Signal transduction;Cellular community - eukaryotes;Signal transduction;Signal transduction;Cancers;Signal transduction;Cancers;Cancers;Cellular community - eukaryotes;Drug resistance;Cancers;Cancers;Cancers	ko05200//Pathways in cancer;ko04151//PI3K-Akt signaling pathway;ko05165//Human papillomavirus infection;ko04010//MAPK signaling pathway;ko05166//HTLV-I infection;ko04014//Ras signaling pathway;ko04810//Regulation of actin cytoskeleton;ko04015//Rap1 signaling pathway;ko04510//Focal adhesion;ko04020//Calcium signaling pathway;ko04630//Jak-STAT signaling pathway;ko05206//MicroRNAs in cancer;ko04072/…	K05089;K05089;K05089;K05089;K05089;K05089;K05089;K05089;K05089;K05089;K05089;K05089;K05089;K05089;K05089;K05089;K05089;K05089;K05089;K05089	-	-	-
LOC100152997	26	28	40	7	2	13	2.83	2.58	3.72	0.58	0.18	1.25	3.04333	0.67	-2.18342	8.74257e-06	0.000132334	GADD45G	growth arrest and DNA damage-inducible protein GADD45 gamma [Sus scrofa]	Human Diseases;Environmental Information Processing;Human Diseases;Human Diseases;Cellular Processes;Human Diseases;Human Diseases;Cellular Processes;Environmental Information Processing;Cellular Processes;Environmental Information Processing;Human Diseases;Human Diseases;Human Diseases;Cellular Processes;Human Diseases;Human Diseases;Human Diseases;Human Diseases;Human Diseases;Human Diseases;Hu…	Cancers;Signal transduction;Cancers;Cancers;Cell growth and death;Cancers;Cancers;Cell growth and death;Signal transduction;Cell growth and death;Signal transduction;Cancers;Cancers;Cancers;Cell growth and death;Cancers;Cancers;Cancers;Cancers;Cancers;Cancers;Cancers	ko05200//Pathways in cancer;ko04010//MAPK signaling pathway;ko05202//Transcriptional misregulation in cancers;ko05225//Hepatocellular carcinoma;ko04218//Cellular senescence;ko05226//Gastric cancer;ko05224//Breast cancer;ko04210//Apoptosis;ko04068//FoxO signaling pathway;ko04110//Cell cycle;ko04064//NF-kappa B signaling pathway;ko05222//Small cell lung cancer;ko05210//Colorectal cancer;ko05220//Ch…	K04402;K04402;K04402;K04402;K04402;K04402;K04402;K04402;K04402;K04402;K04402;K04402;K04402;K04402;K04402;K04402;K04402;K04402;K04402;K04402;K04402;K04402	-	-	-
LOC100620838	790	847	890	866	797	638	38.78	35.69	38.2	32.28	31.86	27.39	37.5567	30.51	-0.299787	8.84206e-06	0.000133519	PARP3	PREDICTED: poly [ADP-ribose] polymerase 3 isoform X1 [Sus scrofa]	Cellular Processes;Cellular Processes;Environmental Information Processing;Genetic Information Processing	Cell growth and death;Cell growth and death;Signal transduction;Replication and repair	ko04217//Necroptosis;ko04210//Apoptosis;ko04064//NF-kappa B signaling pathway;ko03410//Base excision repair	K10798;K10798;K10798;K10798	-	-	-
LOC106504077	1523	1626	1702	2318	2172	2018	10.03	9.08	9.58	11.62	11.51	11.73	9.56333	11.62	0.281025	8.843e-06	0.000133519	Macf1	PREDICTED: microtubule-actin cross-linking factor 1 isoform X23 [Sus scrofa]	-	-	-	-	-	-	-
LOC808508	456	529	501	792	751	648	153.23	150.69	143.89	202.61	203.04	192.16	149.27	199.27	0.4168	9.18891e-06	0.000138441	MT-ND3	NADH dehydrogenase subunit 3 (mitochondrion) [Sus scrofa]	Metabolism;Organismal Systems;Organismal Systems;Human Diseases;Metabolism	Global and overview maps;Environmental adaptation;Nervous system;Neurodegenerative diseases;Energy metabolism	ko01100//Metabolic pathways;ko04714//Thermogenesis;ko04723//Retrograde endocannabinoid signaling;ko05012//Parkinson disease;ko00190//Oxidative phosphorylation	K03880;K03880;K03880;K03880;K03880	-	-	-
LOC100626707	96	124	124	224	213	193	2.73	3.09	3.05	4.59	4.59	4.24	2.95667	4.47333	0.597379	9.19189e-06	0.000138441	ITGA9	PREDICTED: integrin alpha-9 [Ceratotherium simum simum]	Environmental Information Processing;Human Diseases;Cellular Processes;Cellular Processes;Environmental Information Processing;Human Diseases;Human Diseases;Environmental Information Processing;Human Diseases	Signal transduction;Infectious diseases;Cell motility;Cellular community - eukaryotes;Signaling molecules and interaction;Cardiovascular diseases;Cardiovascular diseases;Signaling molecules and interaction;Cardiovascular diseases	ko04151//PI3K-Akt signaling pathway;ko05165//Human papillomavirus infection;ko04810//Regulation of actin cytoskeleton;ko04510//Focal adhesion;ko04514//Cell adhesion molecules (CAMs);ko05414//Dilated cardiomyopathy (DCM);ko05410//Hypertrophic cardiomyopathy (HCM);ko04512//ECM-receptor interaction;ko05412//Arrhythmogenic right ventricular cardiomyopathy (ARVC)	K06585;K06585;K06585;K06585;K06585;K06585;K06585;K06585;K06585	-	-	-
LOC100622022	727	769	835	1124	1142	1045	22.46	20.18	22.02	26.31	28.2	28.3	21.5533	27.6033	0.356931	9.38267e-06	0.000141138	Zbtb7b	PREDICTED: zinc finger and BTB domain-containing protein 7B [Ceratotherium simum simum]	-	-	-	-	-	-	-
LOC100157814	930	1275	1206	1705	1617	1412	68.09	79.13	75.47	95.03	95.25	91.23	74.23	93.8367	0.338149	9.6104e-06	0.000144383	SF3B4	PREDICTED: splicing factor 3B subunit 4 [Nannospalax galili]	Genetic Information Processing	Transcription	ko03040//Spliceosome	K12831	-	-	-
LOC100511902	215	214	210	177	139	155	10.13	8.64	8.39	6.21	5.11	6.27	9.05333	5.86333	-0.626728	9.97278e-06	0.000149641	RCAN1	PREDICTED: calcipressin-1 isoform X1 [Sus scrofa]	Human Diseases;Organismal Systems;Organismal Systems	Infectious diseases;Endocrine system;Endocrine system	ko05167//Kaposi sarcoma-associated herpesvirus infection;ko04921//Oxytocin signaling pathway;ko04919//Thyroid hormone signaling pathway	K17901;K17901;K17901	-	-	-
LOC100519533	871	1038	986	1452	1317	1224	25.08	24.87	23.46	30.12	29.34	29.33	24.47	29.5967	0.274421	1.01242e-05	0.000151349	DGKZ	PREDICTED: diacylglycerol kinase zeta isoform X1 [Ceratotherium simum simum]	Metabolism;Environmental Information Processing;Metabolism;Environmental Information Processing;Human Diseases;Metabolism	Global and overview maps;Signal transduction;Lipid metabolism;Signal transduction;Cancers;Lipid metabolism	ko01100//Metabolic pathways;ko04072//Phospholipase D signaling pathway;ko00564//Glycerophospholipid metabolism;ko04070//Phosphatidylinositol signaling system;ko05231//Choline metabolism in cancer;ko00561//Glycerolipid metabolism	K00901;K00901;K00901;K00901;K00901;K00901	-	-	-
LOC100524949	1343	1481	1541	2101	2097	1745	81.91	76.67	80.43	97.58	102.99	94.04	79.67	98.2033	0.301735	1.02716e-05	0.000153173	Elf3	PREDICTED: ETS-related transcription factor Elf-3 [Sus scrofa]	-	-	-	-	-	-	-
LOC100520233	154	190	178	138	115	120	4.25	4.44	4.2	2.97	2.55	2.92	4.29667	2.81333	-0.610937	1.08942e-05	0.000162057	ARRDC3	PREDICTED: arrestin domain-containing protein 3 isoform X1 [Sus scrofa]	-	-	-	-	-	-	-
LOC100156733	772	877	867	1218	1159	1136	10.9	10.24	10.18	12.87	13.03	14.12	10.44	13.34	0.353637	1.09753e-05	0.000163062	CHD8	PREDICTED: chromodomain-helicase-DNA-binding protein 8 isoform X2 [Sus scrofa]	Environmental Information Processing	Signal transduction	ko04310//Wnt signaling pathway	K04494	-	-	-
LOC100157535	96	114	103	228	195	167	1.52	1.53	1.39	2.75	2.48	2.33	1.48	2.52	0.767827	1.10502e-05	0.000163972	TMEM151B	PREDICTED: transmembrane protein 151B [Sus scrofa]	-	-	-	-	-	-	-
LOC100624931	340	455	394	375	335	275	12.88	14.48	12.72	10.83	10.14	9.23	13.36	10.0667	-0.408334	1.12579e-05	0.00016685	FAM214B	PREDICTED: protein FAM214B [Sus scrofa]	-	-	-	-	-	-	-
LOC100513945	48	55	57	138	121	96	1.26	1.23	1.28	2.76	2.56	2.23	1.25667	2.51667	1.00191	1.13152e-05	0.000167492	Echdc3	PREDICTED: enoyl-CoA hydratase domain-containing protein 3, mitochondrial [Sus scrofa]	-	-	-	-	GO:0043231//intracellular membrane-bounded organelle	-	-
MSTRG.7730	337	423	409	317	327	328	13.73	14.61	14.24	9.83	10.72	11.79	14.1933	10.78	-0.396856	1.13701e-05	0.000168099	PDGFB	PREDICTED: platelet-derived growth factor subunit B isoform X1 [Hipposideros armiger]	Human Diseases;Environmental Information Processing;Environmental Information Processing;Human Diseases;Environmental Information Processing;Cellular Processes;Environmental Information Processing;Human Diseases;Cellular Processes;Environmental Information Processing;Human Diseases;Human Diseases;Environmental Information Processing;Human Diseases;Human Diseases;Cellular Processes;Human Diseases;…	Cancers;Signal transduction;Signal transduction;Infectious diseases;Signal transduction;Cell motility;Signal transduction;Infectious diseases;Cellular community - eukaryotes;Signal transduction;Cancers;Cardiovascular diseases;Signal transduction;Cancers;Cancers;Cellular community - eukaryotes;Drug resistance;Cancers;Cancers;Cancers	ko05200//Pathways in cancer;ko04151//PI3K-Akt signaling pathway;ko04010//MAPK signaling pathway;ko05166//HTLV-I infection;ko04014//Ras signaling pathway;ko04810//Regulation of actin cytoskeleton;ko04015//Rap1 signaling pathway;ko05167//Kaposi sarcoma-associated herpesvirus infection;ko04510//Focal adhesion;ko04630//Jak-STAT signaling pathway;ko05206//MicroRNAs in cancer;ko05418//Fluid shear stres…	K17386;K17386;K17386;K17386;K17386;K17386;K17386;K17386;K17386;K17386;K17386;K17386;K17386;K17386;K17386;K17386;K17386;K17386;K17386;K17386	-	-	-
LOC100144491	323	398	401	604	594	503	27.93	26.82	27.69	39.84	41.27	38.66	27.48	39.9233	0.53885	1.161e-05	0.000171215	RAB34	PREDICTED: ras-related protein Rab-34 isoform X1 [Sus scrofa]	-	-	-	-	-	-	-
LOC100124377	272	311	337	536	490	413	13.37	12.96	14.15	20.05	19.37	17.91	13.4933	19.11	0.502081	1.16234e-05	0.000171215	SLC44A4	choline transporter-like protein 4 [Sus scrofa]	Human Diseases	Cancers	ko05231//Choline metabolism in cancer	K15377	-	-	-
LOC100049696	61	63	43	146	120	111	1.53	1.38	1.61	3.42	2.48	2.32	1.50667	2.74	0.862816	1.17622e-05	0.000173048	TNNI3	cardiac troponin I [Sus scrofa]	Environmental Information Processing;Organismal Systems;Human Diseases;Human Diseases;Organismal Systems	Signal transduction;Circulatory system;Cardiovascular diseases;Cardiovascular diseases;Circulatory system	ko04024//cAMP signaling pathway;ko04261//Adrenergic signaling in cardiomyocytes;ko05414//Dilated cardiomyopathy (DCM);ko05410//Hypertrophic cardiomyopathy (HCM);ko04260//Cardiac muscle contraction	K12044;K12044;K12044;K12044;K12044	-	-	-
LOC100154105	159	232	223	379	335	307	3.05	3.77	3.66	5.53	5.17	5.2	3.49333	5.3	0.601388	1.17894e-05	0.000173237	KBTBD6	PREDICTED: kelch repeat and BTB domain-containing protein 6 isoform X2 [Orcinus orca]	-	-	-	-	-	-	-
LOC100518190	299	479	374	648	579	585	11.08	15.04	11.84	18.28	17.26	19.13	12.6533	18.2233	0.526269	1.18129e-05	0.00017337	MYCN	PREDICTED: N-myc proto-oncogene protein [Sus scrofa]	Human Diseases	Cancers	ko05202//Transcriptional misregulation in cancers	K09109	-	-	-
LOC100154155	57	67	59	142	126	119	1.81	2.01	1.93	3.51	3.84	3.93	1.91667	3.76	0.972133	1.18994e-05	0.000174428	SLC46A3	PREDICTED: solute carrier family 46 member 3 isoform X1 [Sus scrofa]	-	-	-	-	-	-	-
LOC100157682	567	704	641	986	954	811	24.45	25.64	23.58	32.44	33.08	30.84	24.5567	32.12	0.387357	1.19712e-05	0.000175267	AP1G2	PREDICTED: AP-1 complex subunit gamma-like 2 isoform X1 [Sus scrofa]	Cellular Processes	Transport and catabolism	ko04142//Lysosome	K12391	-	-	-
LOC100620404	685	768	836	1185	1047	994	29.88	28.52	31.38	39.67	37.15	38.6	29.9267	38.4733	0.362427	1.23265e-05	0.000180251	HNRNPR	PREDICTED: heterogeneous nuclear ribonucleoprotein R isoform X1 [Papio anubis]	-	-	-	-	-	-	-
LOC595123	213	204	234	175	165	150	9.4	7.88	8.49	5.76	6.02	5.74	8.59	5.84	-0.55669	1.32004e-05	0.000192563	NAMPT	nicotinamide phosphoribosyltransferase [Sus scrofa]	Metabolism;Organismal Systems;Metabolism	Global and overview maps;Immune system;Metabolism of cofactors and vitamins	ko01100//Metabolic pathways;ko04621//NOD-like receptor signaling pathway;ko00760//Nicotinate and nicotinamide metabolism	K03462;K03462;K03462	-	-	-
LOC100152163	38	45	40	21	12	13	1.29	1.29	1.16	0.54	0.33	0.39	1.24667	0.42	-1.56961	1.39018e-05	0.000202089	DLL4	delta-like protein 4 precursor [Sus scrofa]	Human Diseases;Human Diseases;Organismal Systems;Human Diseases;Environmental Information Processing	Cancers;Cancers;Immune system;Drug resistance;Signal transduction	ko05200//Pathways in cancer;ko05224//Breast cancer;ko04658//Th1 and Th2 cell differentiation;ko01522//Endocrine resistance;ko04330//Notch signaling pathway	K06051;K06051;K06051;K06051;K06051	-	-	-
MSTRG.1252	90	119	124	71	71	66	19.36	21.27	21.98	11.23	11.35	11.94	20.87	11.5067	-0.858961	1.39034e-05	0.000202089	--	-	-	-	-	-	-	-	-
LOC100513815	171	192	190	344	294	286	2.78	2.71	2.59	4.16	3.88	4.2	2.69333	4.08	0.599176	1.39037e-05	0.000202089	CDK12	PREDICTED: cyclin-dependent kinase 12 isoform X1 [Sus scrofa]	-	-	-	-	GO:0000307//cyclin-dependent protein kinase holoenzyme complex;GO:0016604//nuclear body;GO:0043232//intracellular non-membrane-bounded organelle	GO:0004674//protein serine/threonine kinase activity;GO:0005515//protein binding;GO:0032550//purine ribonucleoside binding	GO:0006357//regulation of transcription from RNA polymerase II promoter;GO:0006396//RNA processing;GO:0006468//protein phosphorylation;GO:0007049//cell cycle;GO:0043408//regulation of MAPK cascade
LOC100625315	615	749	710	1060	1001	877	35.81	36.97	35.33	46.99	46.9	45.06	36.0367	46.3167	0.362066	1.41275e-05	0.000205096	ZGPAT	PREDICTED: zinc finger CCCH-type with G patch domain-containing protein, partial [Sus scrofa]	-	-	-	-	-	-	-
LOC100513689	14	20	19	61	48	59	0.25	0.3	0.29	0.82	0.68	0.91	0.28	0.803333	1.52057	1.4484e-05	0.000210018	NCKAP5	PREDICTED: nck-associated protein 5-like, partial [Sus scrofa]	-	-	-	-	-	-	-
LOC100152287	664	727	708	655	638	619	9.41	8.73	8.58	7.07	7.27	7.74	8.90667	7.36	-0.27518	1.47036e-05	0.000212691	TEP1	PREDICTED: telomerase protein component 1 [Sus scrofa]	-	-	-	-	-	-	-
LOC100523533	276	267	286	507	476	365	11.59	9.49	10.27	16.2	16.09	13.52	10.45	15.27	0.547197	1.51649e-05	0.000218317	MEN1	PREDICTED: menin isoform X1 [Sus scrofa]	Human Diseases;Human Diseases	Cancers;Endocrine and metabolic diseases	ko05202//Transcriptional misregulation in cancers;ko04934//Cushing syndrome	K14970;K14970	-	-	-
LOC397059	4	14	10	47	31	44	0.14	0.41	0.3	1.25	0.87	1.36	0.283333	1.16	2.03355	1.54837e-05	0.000222111	ITGA2B	integrin alpha-IIb precursor [Sus scrofa]	Human Diseases;Environmental Information Processing;Human Diseases;Cellular Processes;Environmental Information Processing;Cellular Processes;Human Diseases;Organismal Systems;Organismal Systems;Human Diseases;Human Diseases;Human Diseases;Environmental Information Processing;Human Diseases	Cancers;Signal transduction;Infectious diseases;Cell motility;Signal transduction;Cellular community - eukaryotes;Cardiovascular diseases;Immune system;Immune system;Cancers;Cardiovascular diseases;Cardiovascular diseases;Signaling molecules and interaction;Cardiovascular diseases	ko05200//Pathways in cancer;ko04151//PI3K-Akt signaling pathway;ko05165//Human papillomavirus infection;ko04810//Regulation of actin cytoskeleton;ko04015//Rap1 signaling pathway;ko04510//Focal adhesion;ko05418//Fluid shear stress and atherosclerosis;ko04611//Platelet activation;ko04640//Hematopoietic cell lineage;ko05222//Small cell lung cancer;ko05414//Dilated cardiomyopathy (DCM);ko05410//Hyper…	K06476;K06476;K06476;K06476;K06476;K06476;K06476;K06476;K06476;K06476;K06476;K06476;K06476;K06476	-	-	-
LOC100522465	445	490	520	729	722	681	13.3	12.42	13.29	16.67	17.4	17.98	13.0033	17.35	0.416054	1.58909e-05	0.000227412	ANKRD13A	PREDICTED: ankyrin repeat domain-containing protein 13A isoform X2 [Ceratotherium simum simum]	-	-	-	-	-	-	-
LOC100621280	382	469	479	746	690	558	6.83	7.05	7.17	10.17	9.89	8.78	7.01667	9.61333	0.454251	1.65836e-05	0.000236985	DIP2A	PREDICTED: disco-interacting protein 2 homolog A isoform X3 [Bos taurus]	-	-	-	-	-	-	-
LOC100431100	256	313	310	503	466	399	15.75	16.33	16.42	23.48	23.1	21.57	16.1667	22.7167	0.490729	1.66949e-05	0.000237903	TRM7	putative tRNA (cytidine(32)/guanosine(34)-2'-O)-methyltransferase [Sus scrofa]	-	-	-	-	-	-	-
LOC102163142	147	156	151	286	266	233	1.59	1.43	1.39	2.35	2.31	2.22	1.47	2.29333	0.64163	1.67029e-05	0.000237903	TRANK1	PREDICTED: TPR and ankyrin repeat-containing protein 1 isoform X2 [Tursiops truncatus]	-	-	-	-	-	-	-
LOC100154400	502	591	563	851	832	713	18.61	18.6	17.86	23.98	24.8	23.32	18.3567	24.0333	0.388733	1.68004e-05	0.00023901	CHFR	PREDICTED: E3 ubiquitin-protein ligase CHFR isoform X1 [Sus scrofa]	-	-	-	-	-	-	-
LOC100622057	234	275	261	211	216	181	3.16	3.15	3.02	2.17	2.35	2.16	3.11	2.22667	-0.482029	1.70867e-05	0.000242797	KIF21B	PREDICTED: kinesin-like protein KIF21B isoform X3 [Canis lupus familiaris]	-	-	-	-	-	-	-
LOC100513931	216	245	255	219	169	166	9.84	9.47	9.93	7.6	6.2	6.68	9.74667	6.82667	-0.513728	1.73234e-05	0.000245869	XKR8	PREDICTED: XK-related protein 8 [Sus scrofa]	-	-	-	-	GO:0031224//intrinsic component of membrane	-	GO:0006911//phagocytosis, engulfment;GO:0017121//phospholipid scrambling
LOC100523125	179	223	193	329	327	329	10.97	11.59	10.11	15.35	16.13	17.79	10.89	16.4233	0.592743	1.75169e-05	0.000248325	B3GALT6	PREDICTED: beta-1,3-galactosyltransferase 6 [Sus scrofa]	Metabolism;Metabolism;Metabolism	Global and overview maps;Glycan biosynthesis and metabolism;Glycan biosynthesis and metabolism	ko01100//Metabolic pathways;ko00534//Glycosaminoglycan biosynthesis - heparan sulfate / heparin;ko00532//Glycosaminoglycan biosynthesis - chondroitin sulfate / dermatan sulfate	K00734;K00734;K00734	-	-	-
LOC100522109	96	116	117	217	184	202	2.66	2.91	3.03	4.54	4.14	5.29	2.86667	4.65667	0.699923	1.76108e-05	0.000249069	ELMO1	PREDICTED: engulfment and cell motility protein 1 isoform X3 [Vicugna pacos]	Organismal Systems;Human Diseases;Human Diseases	Immune system;Infectious diseases;Infectious diseases	ko04062//Chemokine signaling pathway;ko05100//Bacterial invasion of epithelial cells;ko05131//Shigellosis	K12366;K12366;K12366	-	-	-
LOC100622590	152	229	194	131	142	138	3.14	4.01	3.42	2.06	2.36	2.51	3.52333	2.31	-0.609048	1.79888e-05	0.000253821	BIRC3	PREDICTED: baculoviral IAP repeat-containing protein 3 [Sus scrofa]	Human Diseases;Cellular Processes;Cellular Processes;Human Diseases;Organismal Systems;Environmental Information Processing;Genetic Information Processing;Cellular Processes;Environmental Information Processing;Environmental Information Processing;Human Diseases;Human Diseases;Human Diseases;Cellular Processes	Cancers;Cellular community - eukaryotes;Cell growth and death;Cancers;Immune system;Signal transduction;Folding, sorting and degradation;Cell growth and death;Signal transduction;Signal transduction;Infectious diseases;Cancers;Drug resistance;Cell growth and death	ko05200//Pathways in cancer;ko04510//Focal adhesion;ko04217//Necroptosis;ko05202//Transcriptional misregulation in cancers;ko04621//NOD-like receptor signaling pathway;ko04390//Hippo signaling pathway;ko04120//Ubiquitin mediated proteolysis;ko04210//Apoptosis;ko04668//TNF signaling pathway;ko04064//NF-kappa B signaling pathway;ko05145//Toxoplasmosis;ko05222//Small cell lung cancer;ko01524//Platin…	K16060;K16060;K16060;K16060;K16060;K16060;K16060;K16060;K16060;K16060;K16060;K16060;K16060;K16060	-	-	-
LOC100626085	628	770	801	701	711	598	9.79	10.21	10.7	8.34	8.92	8.26	10.2333	8.50667	-0.26661	1.81814e-05	0.00025594	BOC	PREDICTED: brother of CDO isoform X1 [Ceratotherium simum simum]	Organismal Systems;Environmental Information Processing	Development;Signal transduction	ko04360//Axon guidance;ko04340//Hedgehog signaling pathway	K20020;K20020	-	-	-
LOC100511368	239	269	229	456	352	404	14.18	13.53	11.61	20.59	16.8	21.15	13.1067	19.5133	0.574159	1.82384e-05	0.000256443	ZNF358	PREDICTED: zinc finger protein 358 isoform X2 [Sus scrofa]	-	-	-	-	-	-	-
LOC100514419	7	14	24	58	57	43	0.33	0.51	0.96	1.88	1.7	1.43	0.6	1.67	1.47681	1.86861e-05	0.000261822	TMPRSS4	PREDICTED: transmembrane protease serine 4 isoform X1 [Sus scrofa]	Human Diseases	Infectious diseases	ko05164//Influenza A	K09635	GO:0031224//intrinsic component of membrane	GO:0004175//endopeptidase activity;GO:0038024//cargo receptor activity	GO:0006897//endocytosis;GO:0019538//protein metabolic process
LOC100621265	660	734	725	1089	1031	882	17.19	16.21	16.14	21.6	21.61	20.28	16.5133	21.1633	0.357936	1.99832e-05	0.000279024	Sik1	PREDICTED: serine/threonine-protein kinase SIK1 [Equus caballus]	Organismal Systems	Endocrine system	ko04922//Glucagon signaling pathway	K19008	-	-	-
LOC100151824	458	575	588	877	734	745	9.71	9.32	9.92	13.73	12.17	14.01	9.65	13.3033	0.463187	2.0118e-05	0.000280582	MRS2	PREDICTED: magnesium transporter MRS2 homolog, mitochondrial isoform X1 [Sus scrofa]	-	-	-	-	-	-	-
LOC100141398	606	726	809	1104	1028	908	12.49	12.63	14.18	17.31	17.11	16.43	13.1	16.95	0.371718	2.01452e-05	0.000280637	CUL7	PREDICTED: cullin-7 [Ceratotherium simum simum]	Genetic Information Processing	Folding, sorting and degradation	ko04120//Ubiquitin mediated proteolysis	K10613	-	-	-
LOC100156478	72	101	106	61	58	45	0.55	0.65	0.69	0.35	0.35	0.3	0.63	0.333333	-0.918386	2.02542e-05	0.000281831	Dnah8	PREDICTED: dynein heavy chain 8, axonemal isoform X1 [Sus scrofa]	Human Diseases	Neurodegenerative diseases	ko05016//Huntington disease	K10408	-	-	-
LOC100627497	83	103	123	207	176	193	1.31	1.38	1.66	2.49	2.24	2.69	1.45	2.47333	0.770404	2.21825e-05	0.000308306	FHDC1	PREDICTED: LOW QUALITY PROTEIN: FH2 domain-containing protein 1 [Lipotes vexillifer]	-	-	-	-	-	-	-
LOC733680	225	257	264	204	183	199	3.83	3.71	3.84	2.65	2.51	2.99	3.79333	2.71667	-0.481629	2.2358e-05	0.000310388	SLC35D2	PREDICTED: UDP-N-acetylglucosamine/UDP-glucose/GDP-mannose transporter [Sus scrofa]	-	-	-	-	-	-	-
LOC100520659	478	598	586	858	855	698	9.35	9.92	9.8	12.78	13.46	12.05	9.69	12.7633	0.397437	2.2738e-05	0.000314938	MYRF	PREDICTED: myelin regulatory factor isoform X1 [Sus scrofa]	-	-	-	-	-	-	-
LOC100517163	174	170	192	327	286	286	7.92	6.97	8.79	11.45	10.64	12.32	7.89333	11.47	0.539159	2.29345e-05	0.000316932	TRIT1	PREDICTED: tRNA dimethylallyltransferase, mitochondrial [Sus scrofa]	Metabolism	Global and overview maps	ko01100//Metabolic pathways	K00791	-	-	-
LOC100515028	149	177	149	296	259	257	4.85	4.74	3.92	6.93	6.48	7.13	4.50333	6.84667	0.604409	2.31198e-05	0.000318763	Ddx11	PREDICTED: LOW QUALITY PROTEIN: probable ATP-dependent RNA helicase DDX11 [Odobenus rosmarus divergens]	-	-	-	-	GO:0005819//spindle;GO:0043231//intracellular membrane-bounded organelle	GO:0003678//DNA helicase activity;GO:0032550//purine ribonucleoside binding;GO:0042623//ATPase activity, coupled;GO:0043566//structure-specific DNA binding	GO:0006725//cellular aromatic compound metabolic process;GO:0007059//chromosome segregation;GO:0032392//DNA geometric change
LOC110255321	1216	1357	1379	1904	1688	1765	34.18	32.32	33.34	40.76	38.16	43.81	33.28	40.91	0.297798	2.32129e-05	0.000319681	EIF5	PREDICTED: eukaryotic translation initiation factor 5 [Equus caballus]	Genetic Information Processing	Translation	ko03013//RNA transport	K03262	-	-	-
LOC110259207	386	492	465	688	667	615	20.86	22.54	21.48	28.31	29.01	29.34	21.6267	28.8867	0.417592	2.35385e-05	0.000323427	PTDSS2	PREDICTED: phosphatidylserine synthase 2 [Orcinus orca]	Metabolism;Metabolism	Global and overview maps;Lipid metabolism	ko01100//Metabolic pathways;ko00564//Glycerophospholipid metabolism	K08730;K08730	-	-	-
LOC100153642	42	59	67	26	33	17	4.66	5.55	6.36	2.2	2.95	1.67	5.52333	2.27333	-1.28073	2.42441e-05	0.000331987	ANKRD37	PREDICTED: ankyrin repeat domain-containing protein 37 [Sus scrofa]	-	-	-	-	-	-	-
LOC110260604	146	177	185	303	269	279	4.29	4.41	4.66	6.82	6.37	7.24	4.45333	6.81	0.612769	2.46375e-05	0.000336611	DENND6B	PREDICTED: protein DENND6B [Balaenoptera acutorostrata scammoni]	-	-	-	-	-	-	-
LOC100520501	406	486	458	732	613	652	5.16	5.2	4.96	7.23	6.39	7.4	5.10667	7.00667	0.456346	2.4719e-05	0.00033717	ANKRD17	PREDICTED: ankyrin repeat domain-containing protein 17 isoform X1 [Capra hircus]	-	-	-	-	-	-	-
LOC403334	538	599	607	545	520	509	27.24	25.73	26.27	21.02	21.19	22.75	26.4133	21.6533	-0.286677	2.47623e-05	0.00033717	CYP51A1	lanosterol 14-alpha demethylase [Sus scrofa]	Metabolism;Metabolism	Global and overview maps;Lipid metabolism	ko01100//Metabolic pathways;ko00100//Steroid biosynthesis	K05917;K05917	-	-	-
LOC100048957	532	646	615	570	490	541	43.02	44.25	42.47	35.1	31.85	38.57	43.2467	35.1733	-0.298107	2.50194e-05	0.000339904	BTG3	protein BTG3 [Sus scrofa]	Genetic Information Processing	Folding, sorting and degradation	ko03018//RNA degradation	K14443	-	-	-
LOC100145888	685	953	902	778	826	706	28.14	33.06	31.55	24.54	27.24	25.31	30.9167	25.6967	-0.266804	2.57752e-05	0.000348981	SMAP2	stromal membrane-associated protein 2 [Sus scrofa]	Cellular Processes	Transport and catabolism	ko04144//Endocytosis	K12486	-	-	-
LOC110261006	486	590	556	505	514	438	70.72	72.78	69.15	55.94	60.18	56.25	70.8833	57.4567	-0.302972	2.58033e-05	0.000348981	TRAPPC6A	PREDICTED: trafficking protein particle complex subunit 6A [Orcinus orca]	-	-	-	-	-	-	-
LOC100154880	297	369	348	558	534	450	16.02	16.88	16.05	22.92	23.18	21.43	16.3167	22.51	0.46422	2.60207e-05	0.000351527	NOP9	PREDICTED: nucleolar protein 9 [Sus scrofa]	-	-	-	-	-	-	-
LOC396691	281	302	356	526	467	454	8.08	7.28	8.62	10.8	10.03	11.05	7.99333	10.6267	0.41082	2.65566e-05	0.000358346	Bmpr1b	PREDICTED: bone morphogenetic protein receptor type-1B isoform X1 [Macaca fascicularis]	Environmental Information Processing;Organismal Systems;Environmental Information Processing;Human Diseases;Cellular Processes;Environmental Information Processing	Signaling molecules and interaction;Development;Signal transduction;Cardiovascular diseases;Cellular community - eukaryotes;Signal transduction	ko04060//Cytokine-cytokine receptor interaction;ko04360//Axon guidance;ko04390//Hippo signaling pathway;ko05418//Fluid shear stress and atherosclerosis;ko04550//Signaling pathways regulating pluripotency of stem cells;ko04350//TGF-beta signaling pathway	K13578;K13578;K13578;K13578;K13578;K13578	-	-	-
LOC397417	31	23	33	101	75	59	9.72	6.09	8.76	23.8	18.73	16.14	8.19	19.5567	1.25573	2.65848e-05	0.000358346	--	metallothionein-1A [Sus scrofa]	-	-	-	-	-	-	-
LOC100521593	197	207	227	164	140	169	9.1	8.11	8.96	5.77	5.2	6.89	8.72333	5.95333	-0.551182	2.67301e-05	0.000359902	Dnajb9	PREDICTED: dnaJ homolog subfamily B member 9 [Sus scrofa]	-	-	-	-	-	-	-
LOC100152843	81	83	87	166	169	147	4.61	4.01	4.23	7.2	7.74	7.39	4.28333	7.44333	0.797215	2.81349e-05	0.000377552	FOXQ1	PREDICTED: forkhead box protein Q1 [Panthera pardus]	-	-	-	-	-	-	-
LOC100513615	513	607	611	907	811	750	17.31	17.35	17.61	23.28	21.99	22.32	17.4233	22.53	0.370827	2.88735e-05	0.000386603	AOPEP	PREDICTED: aminopeptidase O isoform X2 [Tursiops truncatus]	-	-	-	-	-	-	-
LOC102162899	380	498	490	684	699	626	12.29	13.65	13.54	16.82	18.19	17.87	13.16	17.6267	0.4216	2.90233e-05	0.000388178	SYS1	PREDICTED: protein SYS1 homolog [Sus scrofa]	-	-	-	-	-	-	-
LOC397014	948	1119	1153	1488	1504	1388	10.56	10.57	10.82	12.44	13.54	13.57	10.65	13.1833	0.307862	3.01667e-05	0.000401942	HTT	huntingtin [Sus scrofa]	Human Diseases	Neurodegenerative diseases	ko05016//Huntington disease	K04533	-	-	-
LOC100737299	311	368	330	531	509	491	7.26	7.28	6.58	9.43	9.56	10.11	7.04	9.7	0.462409	3.0469e-05	0.000405268	RGMB	PREDICTED: RGM domain family member B isoform X2 [Sus scrofa]	-	-	-	-	-	-	-
LOC397337	410	517	502	462	411	389	47.29	50.55	49.49	40.57	38.14	39.6	49.11	39.4367	-0.316479	3.1433e-05	0.00041741	DHDH	trans-1,2-dihydrobenzene-1,2-diol dehydrogenase [Sus scrofa]	Metabolism;Metabolism	Xenobiotics biodegradation and metabolism;Carbohydrate metabolism	ko00980//Metabolism of xenobiotics by cytochrome P450;ko00040//Pentose and glucuronate interconversions	K00078;K00078	-	-	-
LOC100511364	264	316	329	472	470	449	10.51	10.67	11.2	14.32	15.06	15.78	10.7933	15.0533	0.479943	3.27775e-05	0.000434536	Ovol2	PREDICTED: putative transcription factor Ovo-like 1 [Sus scrofa]	-	-	-	-	-	-	-
LOC100511685	126	122	134	244	208	225	3.86	3.17	3.53	5.71	5.15	6.1	3.52	5.65333	0.683526	3.29149e-05	0.000435878	UPK3B	PREDICTED: uroplakin-3b [Sus scrofa]	-	-	-	-	-	-	-
LOC100524129	513	617	573	898	781	759	14.87	15.02	13.03	20.17	17.76	18.61	14.3067	18.8467	0.397622	3.30063e-05	0.00043661	PPP6R3	PREDICTED: serine/threonine-protein phosphatase 6 regulatory subunit 3 isoform X1 [Camelus dromedarius]	-	-	-	-	-	-	-
LOC100154560	350	370	383	624	511	534	4.76	4.26	4.45	6.45	5.59	6.4	4.49	6.14667	0.453089	3.33533e-05	0.000440717	HEATR1	PREDICTED: HEAT repeat-containing protein 1 [Sus scrofa]	Genetic Information Processing	Translation	ko03008//Ribosome biogenesis in eukaryotes	K14550	-	-	-
LOC733604	165	211	237	147	164	146	24.75	26.83	30.39	16.79	19.8	19.33	27.3233	18.64	-0.551732	3.39242e-05	0.000446793	SELENOK	selenoprotein K [Sus scrofa]	-	-	-	-	-	-	-
LOC100739793	272	282	345	578	443	412	10.41	9.02	11.17	16.63	13.59	13.79	10.2	14.67	0.5243	3.44951e-05	0.000453815	ZNF362	PREDICTED: zinc finger protein 362 isoform X1 [Hipposideros armiger]	-	-	-	-	-	-	-
LOC102164658	530	689	655	644	550	505	21.57	23.77	22.78	19.95	18.01	18.14	22.7067	18.7	-0.280078	3.67435e-05	0.000481296	FAM83D	PREDICTED: protein FAM83D [Ovis aries musimon]	-	-	-	-	-	-	-
LOC100153630	191	210	200	157	166	134	10.29	15.17	13.18	7.87	8.3	8.26	12.88	8.14333	-0.661441	3.6806e-05	0.000481592	CSRP2	PREDICTED: cysteine and glycine-rich protein 2 isoform X2 [Sus scrofa]	-	-	-	-	-	-	-
LOC396958	475	608	566	514	479	483	30.49	33.08	31.05	25.12	24.74	27.36	31.54	25.74	-0.293171	3.69023e-05	0.000482329	HEXB	beta-hexosaminidase subunit beta precursor [Sus scrofa]	Metabolism;Cellular Processes;Metabolism;Metabolism;Metabolism;Metabolism;Metabolism	Global and overview maps;Transport and catabolism;Carbohydrate metabolism;Glycan biosynthesis and metabolism;Glycan biosynthesis and metabolism;Glycan biosynthesis and metabolism;Glycan biosynthesis and metabolism	ko01100//Metabolic pathways;ko04142//Lysosome;ko00520//Amino sugar and nucleotide sugar metabolism;ko00531//Glycosaminoglycan degradation;ko00511//Other glycan degradation;ko00603//Glycosphingolipid biosynthesis - globo and isoglobo series;ko00604//Glycosphingolipid biosynthesis - ganglio series	K12373;K12373;K12373;K12373;K12373;K12373;K12373	-	-	-
LOC733668	538	627	573	860	818	810	36.22	35.78	32.97	44.08	44.31	48.12	34.99	45.5033	0.37903	3.75485e-05	0.000490243	DIRAS3	GTP-binding protein Di-Ras3 [Sus scrofa]	-	-	-	-	-	-	-
LOC100525720	399	435	471	720	616	586	7.84	7.25	7.91	10.77	9.74	10.16	7.66667	10.2233	0.415194	3.77052e-05	0.000491758	SAP30L	PREDICTED: histone deacetylase complex subunit SAP30L [Sus scrofa]	-	-	-	-	-	-	-
LOC100517744	632	744	697	613	647	625	33.89	33.82	31.95	25.03	27.92	29.58	33.22	27.51	-0.272096	3.81632e-05	0.000497193	Prps1	Ribose-phosphate pyrophosphokinase 1, partial [Bos mutus]	Metabolism;Metabolism;Metabolism;Metabolism;Metabolism	Global and overview maps;Nucleotide metabolism;Global and overview maps;Global and overview maps;Carbohydrate metabolism	ko01100//Metabolic pathways;ko00230//Purine metabolism;ko01200//Carbon metabolism;ko01230//Biosynthesis of amino acids;ko00030//Pentose phosphate pathway	K00948;K00948;K00948;K00948;K00948	-	-	-
LOC100154194	195	198	187	371	338	264	8.56	7.35	7.02	12.38	11.93	10.23	7.64333	11.5133	0.591032	3.84438e-05	0.000500309	SFXN3	PREDICTED: sideroflexin-3 isoform X1 [Vicugna pacos]	-	-	-	-	-	-	-
LOC100626205	1028	1171	1214	1600	1619	1404	31.58	30.49	31.87	37.42	40.01	38.06	31.3133	38.4967	0.297956	3.9108e-05	0.000507857	SLC38A2	PREDICTED: putative sodium-coupled neutral amino acid transporter 10 isoform X2 [Sus scrofa]	-	-	-	-	-	-	-
LOC100625138	1146	1364	1365	1855	1830	1534	31.23	31.51	31.79	38.48	40.12	36.89	31.51	38.4967	0.288924	4.01561e-05	0.000520907	LSS	PREDICTED: lanosterol synthase isoform X1 [Lipotes vexillifer]	Metabolism;Metabolism	Global and overview maps;Lipid metabolism	ko01100//Metabolic pathways;ko00100//Steroid biosynthesis	K01852;K01852	-	-	-
LOC397411	108	107	135	221	213	192	10.04	8.43	10.72	15.64	15.93	15.75	9.73	15.7733	0.696976	4.03301e-05	0.000522601	MMP7	matrilysin [Sus scrofa]	Environmental Information Processing	Signal transduction	ko04310//Wnt signaling pathway	K01397	-	-	-
LOC100623451	442	523	542	756	691	747	18.21	17.73	19.22	24.43	21.64	23.64	18.3867	23.2367	0.337743	4.05596e-05	0.00052445	ZDHHC20	PREDICTED: probable palmitoyltransferase ZDHHC20 [Sus scrofa]	-	-	-	-	-	-	-
LOC110261345	1363	1612	1575	2165	2072	1800	50.77	50.96	50.1	61.62	62.36	59.5	50.61	61.16	0.273166	4.20052e-05	0.0005414	Nadk	PREDICTED: NAD kinase isoform X2 [Myotis brandtii]	Metabolism;Metabolism	Global and overview maps;Metabolism of cofactors and vitamins	ko01100//Metabolic pathways;ko00760//Nicotinate and nicotinamide metabolism	K00858;K00858	-	-	-
LOC100156356	448	470	495	742	680	634	5.04	4.42	4.58	6.2	6.09	6.03	4.68	6.10667	0.383877	4.26147e-05	0.000548085	PRR14L	PREDICTED: protein PRR14L isoform X1 [Sus scrofa]	-	-	-	-	-	-	-
LOC100524832	567	657	620	610	550	530	13.49	13.28	12.65	11.09	10.57	11.17	13.14	10.9433	-0.263913	4.2668e-05	0.000548186	SGPP2	PREDICTED: sphingosine-1-phosphate phosphatase 2 [Orcinus orca]	Environmental Information Processing;Metabolism	Signal transduction;Lipid metabolism	ko04071//Sphingolipid signaling pathway;ko00600//Sphingolipid metabolism	K04717;K04717	-	-	-
LOC100512285	302	329	336	566	473	438	9.92	9.21	9.48	14.18	12.54	12.71	9.53667	13.1433	0.462774	4.28302e-05	0.000549685	CEACAM1	PREDICTED: carcinoembryonic antigen-related cell adhesion molecule 7-like isoform X1 [Sus scrofa]	-	-	-	-	-	-	-
LOC100038004	2	5	2	31	18	21	0.16	0.22	0.13	0.88	0.58	1.04	0.17	0.833333	2.29336	4.31735e-05	0.000553502	EGR2	PREDICTED: E3 SUMO-protein ligase EGR2 isoform X1 [Sus scrofa]	Human Diseases;Human Diseases;Human Diseases;Organismal Systems	Infectious diseases;Cancers;Infectious diseases;Immune system	ko05166//HTLV-I infection;ko05203//Viral carcinogenesis;ko05161//Hepatitis B;ko04625//C-type lectin receptor signaling pathway	K12496;K12496;K12496;K12496	-	-	-
MSTRG.22028	188	198	220	189	141	127	8.9	7.98	8.94	6.82	5.39	5.32	8.60667	5.84333	-0.558663	4.36558e-05	0.000559091	ANXA2R	PREDICTED: annexin-2 receptor [Sus scrofa]	-	-	-	-	-	-	-
LOC408053	257	269	257	249	200	175	6.58	5.89	5.63	4.83	4.1	4.02	6.03333	4.31667	-0.483038	4.42191e-05	0.000565704	HAS3	PREDICTED: transport and Golgi organization protein 6 homolog isoform X1 [Tursiops truncatus]	-	-	-	-	-	-	-
LOC102157778	63	69	66	146	112	147	2.31	2.15	2.07	4.08	3.31	4.76	2.17667	4.05	0.895801	4.42889e-05	0.000565997	--	PREDICTED: uncharacterized protein LOC102157778 [Sus scrofa]	-	-	-	-	-	-	-
LOC100156510	461	525	571	499	451	445	7	6.77	7.41	5.78	5.52	5.95	7.06	5.75	-0.296106	4.44829e-05	0.000567875	MLXIP	PREDICTED: MLX-interacting protein isoform X2 [Ovis aries musimon]	Human Diseases;Human Diseases	Endocrine and metabolic diseases;Endocrine and metabolic diseases	ko04932//Non-alcoholic fatty liver disease (NAFLD);ko04931//Insulin resistance	K09113;K09113	-	-	-
LOC100156502	553	722	645	1015	865	849	10.54	11.67	10.51	14.73	13.27	14.28	10.9067	14.0933	0.369803	4.50432e-05	0.00057442	Foxa1	PREDICTED: hepatocyte nuclear factor 3-alpha [Sus scrofa]	-	-	-	-	-	-	-
LOC100514837	168	134	159	304	272	234	4.62	3.41	4.16	6.91	6.4	5.89	4.06333	6.4	0.655408	4.54147e-05	0.000578546	KCNH3	PREDICTED: potassium voltage-gated channel subfamily H member 3 isoform X1 [Camelus bactrianus]	-	-	-	-	-	-	-
LOC100523009	170	187	241	322	358	310	5.37	5.01	6.5	7.74	9.1	8.64	5.62667	8.49333	0.59405	4.62806e-05	0.000587715	PCSK7	PREDICTED: proprotein convertase subtilisin/kexin type 7 [Sus scrofa]	-	-	-	-	-	-	-
LOC100155900	414	442	568	788	651	702	20.71	18.51	24.61	31.35	26.49	31.45	21.2767	29.7633	0.484264	4.68532e-05	0.000594361	TSC22D1	PREDICTED: TSC22 domain family protein 1 isoform X4 [Sus scrofa]	-	-	-	-	-	-	-
LOC110257481	265	322	365	556	474	431	11.06	11.38	13	17.64	15.89	15.88	11.8133	16.47	0.479424	4.71415e-05	0.000596763	OSBPL2	PREDICTED: oxysterol-binding protein-related protein 2 isoform X3 [Equus przewalskii]	-	-	-	-	-	-	-
LOC100512481	554	618	657	892	888	806	8.63	8.16	8.75	10.58	11.13	11.08	8.51333	10.93	0.360497	4.82847e-05	0.000608786	SHROOM3	PREDICTED: protein Shroom3 isoform X1 [Sus scrofa]	-	-	-	-	-	-	-
LOC100519135	148	164	137	277	287	216	4.51	4.23	3.57	6.42	7.03	5.81	4.10333	6.42	0.645777	4.82931e-05	0.000608786	RAB11FIP3	PREDICTED: rab11 family-interacting protein 3 [Lipotes vexillifer]	Cellular Processes	Transport and catabolism	ko04144//Endocytosis	K12485	-	-	-
LOC110259886	433	531	527	753	679	732	6.87	7.16	7.14	9.1	8.67	10.25	7.05667	9.34	0.404436	4.87611e-05	0.000614044	TRIM56	tripartite motif containing 56 [Sus scrofa]	-	-	-	-	-	-	-
LOC110261124	85	102	103	38	80	43	13.53	13.78	14.02	4.6	10.25	6.04	13.7767	6.96333	-0.984377	4.88608e-05	0.000614657	IFI6	PREDICTED: interferon alpha-inducible protein 6 [Vicugna pacos]	-	-	-	-	-	-	-
LOC102164483	491	577	537	841	757	700	16.67	16.61	15.61	21.74	20.73	21	16.2967	21.1567	0.376535	4.92529e-05	0.000618945	ALS2CL	PREDICTED: ALS2 C-terminal-like protein [Sus scrofa]	-	-	-	-	-	-	-
LOC100518211	530	623	636	616	476	517	26.35	26.24	27	23.29	19.03	22.67	26.53	21.6633	-0.292369	5.08507e-05	0.000638359	PRTFDC1	PREDICTED: phosphoribosyltransferase domain-containing protein 1 isoform X1 [Sus scrofa]	-	-	-	-	-	-	-
LOC100624418	701	788	799	1108	1035	1028	17.32	16.5	16.87	20.84	20.57	22.41	16.8967	21.2733	0.332307	5.09113e-05	0.000638455	FAM110C	PREDICTED: protein FAM110C [Orcinus orca]	-	-	-	-	-	-	-
LOC100156484	609	640	658	615	607	528	31.54	28.1	29.1	24.23	25.27	24.11	29.58	24.5367	-0.269683	5.25742e-05	0.000657259	Maff	PREDICTED: transcription factor MafF isoform X1 [Sus scrofa]	-	-	-	-	-	-	-
LOC100514801	1220	1352	1386	1894	1815	1585	13.88	13.04	13.48	16.4	16.61	15.91	13.4667	16.3067	0.276069	5.29235e-05	0.000660941	TNS1	PREDICTED: tensin-1 isoform X3 [Bos mutus]	-	-	-	-	GO:0030054//cell junction	GO:0003723//RNA binding	GO:0001667//ameboidal-type cell migration;GO:0034329//cell junction assembly
LOC100155587	219	279	290	236	202	199	15.2	15.85	16.91	12.38	11.02	11.47	15.9867	11.6233	-0.459845	5.31716e-05	0.000663352	HSDL2	hydroxysteroid dehydrogenase-like protein 2 [Sus scrofa]	-	-	-	-	-	-	-
LOC100533476	197	192	224	372	320	303	13.97	11.54	13.57	20.08	18.25	18.96	13.0267	19.0967	0.551853	5.35832e-05	0.000667798	Ppan	suppressor of SWI4 1 homolog [Sus scrofa]	-	-	-	-	-	-	-
LOC100514368	787	935	988	1322	1260	1123	19.58	19.72	21.01	25.03	25.22	24.65	20.1033	24.9667	0.312568	5.36445e-05	0.000667871	ARHGAP23	PREDICTED: rho GTPase-activating protein 23 isoform X4 [Ovis aries musimon]	-	-	-	-	GO:0031988//membrane-bounded vesicle;GO:0044444//cytoplasmic part	GO:0008047//enzyme activator activity;GO:0008289//lipid binding	GO:0043087//regulation of GTPase activity
LOC100737004	96	133	119	211	206	197	2.24	2.55	2.36	3.64	3.75	3.99	2.38333	3.79333	0.670485	5.43536e-05	0.000676002	COBLL1	PREDICTED: cordon-bleu protein-like 1 isoform X2 [Physeter catodon]	-	-	-	-	-	-	-
LOC641342	20	27	20	81	61	47	0.44	0.5	0.37	1.36	1.08	0.92	0.436667	1.12	1.35889	5.51068e-05	0.000684664	Nr1d1	PREDICTED: nuclear receptor subfamily 1 group D member 1 [Dasypus novemcinctus]	Organismal Systems	Environmental adaptation	ko04710//Circadian rhythm	K03728	-	-	-
LOC396934	199	220	200	354	323	318	17.32	16.23	14.88	23.45	22.62	24.42	16.1433	23.4967	0.541518	5.6291e-05	0.000697939	RENBP	N-acylglucosamine 2-epimerase [Sus scrofa]	Metabolism	Carbohydrate metabolism	ko00520//Amino sugar and nucleotide sugar metabolism	K01787	-	-	-
LOC100738302	86	159	116	74	80	74	5.08	8.05	5.72	3.4	3.63	3.96	6.28333	3.66333	-0.778373	5.66303e-05	0.000701425	CEACAM19	PREDICTED: LOW QUALITY PROTEIN: carcinoembryonic antigen-related cell adhesion molecule 19 [Sus scrofa]	-	-	-	-	-	-	-
LOC100738269	1191	1306	1259	1774	1719	1561	57.43	53.39	51.89	65.13	66.7	66.43	54.2367	66.0867	0.285091	5.67901e-05	0.000702683	PDPN	PREDICTED: podoplanin isoform X1 [Sus scrofa]	-	-	-	-	-	-	-
LOC100514510	142	167	180	288	276	246	9.86	9.83	10.68	15.22	15.41	15.07	10.1233	15.2333	0.589547	5.75067e-05	0.000710821	TM7SF2	PREDICTED: delta(14)-sterol reductase isoform X1 [Sus scrofa]	Metabolism;Metabolism	Global and overview maps;Lipid metabolism	ko01100//Metabolic pathways;ko00100//Steroid biosynthesis	K00222;K00222	GO:0043234//protein complex	GO:0016627//oxidoreductase activity, acting on the CH-CH group of donors	GO:0044710//single-organism metabolic process
LOC100517151	364	423	412	674	558	541	7.8	7.69	7.55	11	9.62	10.23	7.68	10.2833	0.42113	5.77218e-05	0.000712749	POLR1B	PREDICTED: DNA-directed RNA polymerase I subunit RPA2 [Sus scrofa]	Metabolism;Metabolism;Metabolism;Genetic Information Processing	Global and overview maps;Nucleotide metabolism;Nucleotide metabolism;Transcription	ko01100//Metabolic pathways;ko00230//Purine metabolism;ko00240//Pyrimidine metabolism;ko03020//RNA polymerase	K03002;K03002;K03002;K03002	-	-	-
LOC100513778	201	220	242	360	371	322	13.11	12.37	12.49	17.03	18.9	17.6	12.6567	17.8433	0.495488	5.79563e-05	0.000714913	CDC42EP2	PREDICTED: cdc42 effector protein 2 [Sus scrofa]	-	-	-	-	GO:0005856//cytoskeleton;GO:0016020//membrane	GO:0008047//enzyme activator activity;GO:0017048//Rho GTPase binding	GO:0022604//regulation of cell morphogenesis;GO:0030833//regulation of actin filament polymerization;GO:0031269//pseudopodium assembly;GO:0043087//regulation of GTPase activity
LOC100513204	409	412	438	656	618	580	16.46	14.06	15.07	20.1	20.01	20.6	15.1967	20.2367	0.413217	5.91636e-05	0.000726833	MOGS	PREDICTED: mannosyl-oligosaccharide glucosidase isoform X1 [Sus scrofa]	Metabolism;Genetic Information Processing;Metabolism	Global and overview maps;Folding, sorting and degradation;Glycan biosynthesis and metabolism	ko01100//Metabolic pathways;ko04141//Protein processing in endoplasmic reticulum;ko00510//N-Glycan biosynthesis	K01228;K01228;K01228	-	-	-
LOC100520035	642	744	715	1007	994	925	18.95	18.62	18.04	22.63	23.61	24.09	18.5367	23.4433	0.338796	6.0202e-05	0.000737337	PCDH7	protocadherin-7 precursor [Sus scrofa]	-	-	-	-	-	-	-
LOC110259171	423	446	426	672	755	548	3.12	2.79	2.69	3.78	4.49	3.57	2.86667	3.94667	0.461261	6.04422e-05	0.000739528	PCNT	PREDICTED: pericentrin [Bison bison bison]	-	-	-	-	-	-	-
LOC100157144	625	742	721	1112	928	889	29.78	29.97	29.36	40.34	35.58	37.38	29.7033	37.7667	0.346489	6.08008e-05	0.000743161	DUSP5	PREDICTED: dual specificity protein phosphatase 5 [Sus scrofa]	Environmental Information Processing	Signal transduction	ko04010//MAPK signaling pathway	K04459	-	-	-
LOC100520742	550	700	616	944	893	802	7.56	8.16	7.24	9.88	9.88	9.73	7.65333	9.83	0.361103	6.13869e-05	0.000749567	KMT2B	PREDICTED: histone-lysine N-methyltransferase 2B [Sus scrofa]	Metabolism	Amino acid metabolism	ko00310//Lysine degradation	K14959	-	-	-
LOC100154798	947	1074	1148	1496	1451	1331	31.2	29.99	32.31	37.55	38.47	38.68	31.1667	38.2333	0.294827	6.19385e-05	0.000755537	BAP1	PREDICTED: ubiquitin carboxyl-terminal hydrolase BAP1 isoform X1 [Sus scrofa]	-	-	-	-	-	-	-
LOC100141411	390	445	441	701	621	548	8.79	8.63	8.47	12.14	11.28	11.03	8.63	11.4833	0.412109	6.21868e-05	0.0007578	ADNP	PREDICTED: activity-dependent neuroprotector homeobox protein isoform X1 [Sus scrofa]	-	-	-	-	-	-	-
LOC397490	70	80	70	53	41	30	4.16	4.03	3.55	2.4	1.96	1.57	3.91333	1.97667	-0.985328	6.22674e-05	0.000758001	INHBB	inhibin beta B chain precursor [Sus scrofa]	Environmental Information Processing;Cellular Processes;Environmental Information Processing	Signaling molecules and interaction;Cellular community - eukaryotes;Signal transduction	ko04060//Cytokine-cytokine receptor interaction;ko04550//Signaling pathways regulating pluripotency of stem cells;ko04350//TGF-beta signaling pathway	K22687;K22687;K22687	-	-	-
LOC100153961	38	62	64	111	115	119	2.07	2.87	2.98	4.61	5.05	5.73	2.64	5.13	0.958421	6.28225e-05	0.000763233	HOGA1	4-hydroxy-2-oxoglutarate aldolase, mitochondrial [Sus scrofa]	Metabolism;Metabolism;Metabolism	Global and overview maps;Amino acid metabolism;Carbohydrate metabolism	ko01100//Metabolic pathways;ko00330//Arginine and proline metabolism;ko00630//Glyoxylate and dicarboxylate metabolism	K18123;K18123;K18123	-	-	-
LOC100155987	461	567	499	792	762	652	12.16	12.68	11.25	15.9	16.17	15.17	12.03	15.7467	0.38841	6.45762e-05	0.000780609	RRP12	PREDICTED: RRP12-like protein [Sus scrofa]	-	-	-	-	-	-	-
LOC100037276	420	481	454	401	392	400	14.49	15.32	14.07	11.01	11.26	12.86	14.6267	11.71	-0.32086	6.85788e-05	0.000824039	ITGB6	integrin beta-6 precursor [Sus scrofa]	Environmental Information Processing;Human Diseases;Cellular Processes;Cellular Processes;Human Diseases;Human Diseases;Environmental Information Processing;Human Diseases	Signal transduction;Infectious diseases;Cell motility;Cellular community - eukaryotes;Cardiovascular diseases;Cardiovascular diseases;Signaling molecules and interaction;Cardiovascular diseases	ko04151//PI3K-Akt signaling pathway;ko05165//Human papillomavirus infection;ko04810//Regulation of actin cytoskeleton;ko04510//Focal adhesion;ko05414//Dilated cardiomyopathy (DCM);ko05410//Hypertrophic cardiomyopathy (HCM);ko04512//ECM-receptor interaction;ko05412//Arrhythmogenic right ventricular cardiomyopathy (ARVC)	K06589;K06589;K06589;K06589;K06589;K06589;K06589;K06589	-	-	-
LOC396955	313	371	314	270	306	252	23.22	25.38	20.03	15.96	19.1	17.44	22.8767	17.5	-0.386522	6.89059e-05	0.000827145	AURKB	aurora kinase B [Sus scrofa]	-	-	-	-	-	-	-
LOC100524800	335	383	379	609	510	511	14.57	14.01	14.04	20.25	18.04	19.73	14.2067	19.34	0.44502	6.94146e-05	0.000832424	Ppp1r16a	PREDICTED: protein phosphatase 1 regulatory subunit 16A [Sus scrofa]	-	-	-	-	-	-	-
LOC100521867	398	425	501	408	371	378	13.27	12.01	14.28	10.36	9.95	11.12	13.1867	10.4767	-0.3319	7.12848e-05	0.000854002	KCTD9	PREDICTED: BTB/POZ domain-containing protein KCTD9 [Sus scrofa]	-	-	-	-	-	-	-
LOC100519103	51	68	64	141	112	116	1.09	1.23	1.17	2.29	1.92	2.18	1.16333	2.13	0.872589	7.32458e-05	0.000875108	Ift88	PREDICTED: intraflagellar transport protein 88 homolog [Mustela putorius furo]	-	-	-	-	-	-	-
LOC100514585	43	23	28	82	79	81	1.04	0.47	0.58	1.51	1.53	1.72	0.696667	1.58667	1.18746	7.36132e-05	0.000877539	RAB3B	PREDICTED: ras-related protein Rab-3B [Sus scrofa]	-	-	-	-	-	-	-
LOC100153346	128	177	145	125	89	104	4.02	4.7	3.89	2.99	2.23	2.88	4.20333	2.7	-0.638574	7.40035e-05	0.000881321	MICAL1	PREDICTED: protein-methionine sulfoxide oxidase MICAL1 isoform X1 [Sus scrofa]	-	-	-	-	-	-	-
LOC100523855	3	5	0	22	20	23	0.49	0.71	0	2.93	2.79	3.63	0.4	3.11667	2.96193	7.54076e-05	0.000897157	--	PREDICTED: uncharacterized protein C11orf71 homolog [Sus scrofa]	-	-	-	-	-	-	-
LOC100626434	323	369	355	552	525	477	33.06	32.02	31.05	43.01	43.23	43.08	32.0433	43.1067	0.427887	7.79258e-05	0.000925293	ADI1	1,2-dihydroxy-3-keto-5-methylthiopentene dioxygenase [Sus scrofa]	Metabolism;Metabolism	Global and overview maps;Amino acid metabolism	ko01100//Metabolic pathways;ko00270//Cysteine and methionine metabolism	K08967;K08967	-	-	-
LOC100520242	113	144	156	122	87	77	8.74	9.44	10.31	7.18	5.41	5.26	9.49667	5.95	-0.674532	7.81934e-05	0.000927385	MLLT11	protein AF1q [Sus scrofa]	-	-	-	-	-	-	-
LOC100525363	952	1108	1071	1534	1357	1331	24.57	24.25	23.63	30.15	28.18	30.32	24.15	29.55	0.291135	7.89357e-05	0.000933608	Crkl	PREDICTED: crk-like protein [Sus scrofa]	Human Diseases;Environmental Information Processing;Human Diseases;Cellular Processes;Environmental Information Processing;Cellular Processes;Organismal Systems;Human Diseases;Organismal Systems;Organismal Systems;Organismal Systems;Environmental Information Processing;Human Diseases;Human Diseases;Human Diseases;Human Diseases	Cancers;Signal transduction;Infectious diseases;Cell motility;Signal transduction;Cellular community - eukaryotes;Immune system;Cancers;Endocrine system;Nervous system;Immune system;Signal transduction;Cancers;Infectious diseases;Infectious diseases;Cancers	ko05200//Pathways in cancer;ko04010//MAPK signaling pathway;ko05163//Human cytomegalovirus infection;ko04810//Regulation of actin cytoskeleton;ko04015//Rap1 signaling pathway;ko04510//Focal adhesion;ko04062//Chemokine signaling pathway;ko05206//MicroRNAs in cancer;ko04910//Insulin signaling pathway;ko04722//Neurotrophin signaling pathway;ko04666//Fc gamma R-mediated phagocytosis;ko04012//ErbB sig…	K04438;K04438;K04438;K04438;K04438;K04438;K04438;K04438;K04438;K04438;K04438;K04438;K04438;K04438;K04438;K04438	-	-	-
LOC110256149	378	357	377	633	556	495	19.91	16	16.95	25.45	23.54	22.96	17.62	23.9833	0.444818	7.98697e-05	0.00094373	MAP2K3	PREDICTED: dual specificity mitogen-activated protein kinase kinase 3 [Capra hircus]	Environmental Information Processing;Organismal Systems;Environmental Information Processing;Human Diseases;Human Diseases;Cellular Processes;Organismal Systems;Environmental Information Processing;Organismal Systems;Human Diseases;Organismal Systems;Organismal Systems;Human Diseases	Signal transduction;Environmental adaptation;Signal transduction;Infectious diseases;Infectious diseases;Cell growth and death;Immune system;Signal transduction;Sensory system;Infectious diseases;Endocrine system;Immune system;Neurodegenerative diseases	ko04010//MAPK signaling pathway;ko04714//Thermogenesis;ko04015//Rap1 signaling pathway;ko05169//Epstein-Barr virus infection;ko05164//Influenza A;ko04218//Cellular senescence;ko04620//Toll-like receptor signaling pathway;ko04668//TNF signaling pathway;ko04750//Inflammatory mediator regulation of TRP channels;ko05145//Toxoplasmosis;ko04912//GnRH signaling pathway;ko04664//Fc epsilon RI signaling p…	K04432;K04432;K04432;K04432;K04432;K04432;K04432;K04432;K04432;K04432;K04432;K04432;K04432	-	-	-
LOC100517994	96	153	120	214	241	199	2.68	3.62	2.86	4.55	5.41	4.9	3.05333	4.95333	0.698015	8.04566e-05	0.000949734	RGS3	PREDICTED: regulator of G-protein signaling 3 isoform X2 [Vicugna pacos]	Organismal Systems	Development	ko04360//Axon guidance	K07524	-	-	-
LOC100514713	1298	1492	1528	2106	1794	1848	21.77	21.22	21.91	26.89	24.21	27.36	21.6333	26.1533	0.273739	8.25953e-05	0.000974028	AP1G1	PREDICTED: AP-1 complex subunit gamma-1 isoform X1 [Camelus dromedarius]	Cellular Processes	Transport and catabolism	ko04142//Lysosome	K12391	GO:0000139//Golgi membrane;GO:0005768//endosome;GO:0005774//vacuolar membrane;GO:0030119//AP-type membrane coat adaptor complex;GO:0030665//clathrin-coated vesicle membrane;GO:0031984//organelle subcompartment	GO:0008092//cytoskeletal protein binding;GO:0017016//Ras GTPase binding;GO:0022892//substrate-specific transporter activity	GO:0001912//positive regulation of leukocyte mediated cytotoxicity;GO:0002478//antigen processing and presentation of exogenous peptide antigen;GO:0006896//Golgi to vacuole transport;GO:0015031//protein transport;GO:0032816//positive regulation of natural killer cell activation;GO:0043485//endosome to pigment granule transport;GO:0044403//symbiosis, encompassing mutualism through parasitism;GO:00…
LOC100517344	67	89	76	162	149	130	2.07	2.33	2	3.8	3.7	3.54	2.13333	3.68	0.786596	8.27249e-05	0.000974603	RHPN1	PREDICTED: rhophilin-1 isoform X2 [Sus scrofa]	-	-	-	-	-	-	-
LOC100736831	95	92	143	71	78	60	4.92	4.04	6.33	2.8	3.25	2.74	5.09667	2.93	-0.798653	8.3021e-05	0.000977136	TNFSF9	PREDICTED: tumor necrosis factor ligand superfamily member 9 [Sus scrofa]	Environmental Information Processing	Signaling molecules and interaction	ko04060//Cytokine-cytokine receptor interaction	K05472	-	-	-
LOC100621654	79	94	92	44	65	51	4.92	5.89	5.01	2.19	3.76	2.66	5.27333	2.87	-0.877664	8.38244e-05	0.000984671	FAM3D	PREDICTED: protein FAM3D isoform X1 [Sus scrofa]	-	-	-	-	-	-	-
LOC100520414	143	194	169	319	273	244	7.18	8.25	7.25	12.19	11.02	10.81	7.56	11.34	0.584963	8.59102e-05	0.00100623	KNSTRN	PREDICTED: small kinetochore-associated protein isoform X3 [Sus scrofa]	-	-	-	-	-	-	-
LOC100525560	307	406	385	334	341	258	28.02	31.41	30.03	23.2	25.04	20.78	29.82	23.0067	-0.374228	8.64051e-05	0.00101105	CDKN2D	PREDICTED: cyclin-dependent kinase 4 inhibitor D [Sus scrofa]	Environmental Information Processing;Cellular Processes	Signal transduction;Cell growth and death	ko04068//FoxO signaling pathway;ko04110//Cell cycle	K06623;K06623	-	-	-
LOC100144526	1026	1182	1334	1716	1623	1443	42.31	39.66	46.46	55.58	53.86	51.85	42.81	53.7633	0.328675	8.75764e-05	0.00102376	Stx16	PREDICTED: syntaxin-16 isoform X1 [Sus scrofa]	Genetic Information Processing	Folding, sorting and degradation	ko04130//SNARE interactions in vesicular transport	K08489	-	-	-
LOC100152191	338	460	411	640	618	524	15.28	16.47	15.96	20.8	21.31	19.93	15.9033	20.68	0.378907	8.78968e-05	0.00102651	CPSF6	PREDICTED: cleavage and polyadenylation specificity factor subunit 6 isoform X1 [Homo sapiens]	Genetic Information Processing	Translation	ko03015//mRNA surveillance pathway	K14398	-	-	-
LOC100511003	593	627	711	969	939	815	17.21	15.33	17.55	21.31	21.89	20.83	16.6967	21.3433	0.354225	8.89751e-05	0.0010351	UHRF1	PREDICTED: E3 ubiquitin-protein ligase UHRF1 [Sus scrofa]	-	-	-	-	-	-	-
LOC100153308	324	355	349	526	525	479	10	9.34	9.22	12.46	13.09	13.07	9.52	12.8733	0.435352	9.16499e-05	0.0010642	TCTN1	PREDICTED: tectonic-1 isoform X1 [Sus scrofa]	-	-	-	-	-	-	-
LOC100625497	280	329	321	284	239	260	12.08	12	11.84	9.25	8.24	9.75	11.9733	9.08	-0.399061	9.16573e-05	0.0010642	EZH2	PREDICTED: histone-lysine N-methyltransferase EZH2 isoform X1 [Sus scrofa]	Human Diseases;Metabolism	Cancers;Amino acid metabolism	ko05206//MicroRNAs in cancer;ko00310//Lysine degradation	K11430;K11430	-	-	-
LOC100519192	112	110	116	92	74	61	3.64	3.04	3.23	2.28	1.92	1.76	3.30333	1.98667	-0.733573	9.19003e-05	0.00106502	NUDT4	PREDICTED: diphosphoinositol polyphosphate phosphohydrolase 2 isoform X1 [Sus scrofa]	-	-	-	-	-	-	-
LOC100519715	212	269	251	417	356	363	13.86	14.83	13.83	20.66	18.63	20.87	14.1733	20.0533	0.500663	9.21302e-05	0.00106666	AKT1S1	PREDICTED: proline-rich AKT1 substrate 1 isoform X1 [Sus scrofa]	Organismal Systems;Environmental Information Processing;Cellular Processes;Environmental Information Processing;Organismal Systems;Organismal Systems	Environmental adaptation;Signal transduction;Transport and catabolism;Signal transduction;Aging;Aging	ko04714//Thermogenesis;ko04150//mTOR signaling pathway;ko04140//Autophagy - animal;ko04152//AMPK signaling pathway;ko04211//Longevity regulating pathway - mammal;ko04213//Longevity regulating pathway - multiple species	K16184;K16184;K16184;K16184;K16184;K16184	-	-	-
LOC106509633	651	729	739	1084	933	926	6.1	5.76	5.9	7.73	7.05	7.7	5.92	7.49333	0.34001	9.23417e-05	0.00106808	TRRAP	PREDICTED: transformation/transcription domain-associated protein isoform X1 [Canis lupus familiaris]	Human Diseases	Infectious diseases	ko05166//HTLV-I infection	K08874	-	-	-
LOC100514576	370	377	337	309	311	297	10.08	8.61	7.89	6.37	6.97	7.09	8.86	6.81	-0.379652	9.2906e-05	0.00107358	ADAMTSL4	PREDICTED: ADAMTS-like protein 4 isoform X1 [Sus scrofa]	-	-	-	-	GO:0005578//proteinaceous extracellular matrix	GO:0004175//endopeptidase activity	GO:0019538//protein metabolic process;GO:0042981//regulation of apoptotic process;GO:0043062//extracellular structure organization
LOC100156168	35	35	59	86	107	100	1.34	1.14	1.93	2.51	3.3	3.38	1.47	3.06333	1.05929	9.5323e-05	0.00109731	PRSS35	PREDICTED: inactive serine protease 35 [Sus scrofa]	-	-	-	-	-	-	-
LOC100518548	526	670	607	599	577	470	24.61	26.46	24.11	21.3	21.61	19.28	25.06	20.73	-0.273666	9.74102e-05	0.00112026	RTKN	PREDICTED: rhotekin isoform X1 [Balaenoptera acutorostrata scammoni]	-	-	-	-	-	-	-
LOC100523382	991	1193	1140	1603	1461	1380	53.34	54.44	52.45	65.69	63.27	65.55	53.41	64.8367	0.2797	9.78143e-05	0.00112384	Cadm4	PREDICTED: cell adhesion molecule 4 [Odobenus rosmarus divergens]	-	-	-	-	-	-	-
LOC100518988	388	550	513	434	450	393	28.83	34.64	32.57	24.55	26.9	25.77	32.0133	25.74	-0.314661	9.88102e-05	0.00113205	MRPL10	PREDICTED: 39S ribosomal protein L10, mitochondrial isoform X1 [Sus scrofa]	Genetic Information Processing	Translation	ko03010//Ribosome	K02864	-	-	-
LOC100521305	128	165	148	265	272	208	4.56	4.6	4.45	6.88	7.7	6.46	4.53667	7.01333	0.628468	9.89853e-05	0.00113298	Smad7	PREDICTED: mothers against decapentaplegic homolog 7 isoform X1 [Sus scrofa]	Environmental Information Processing;Environmental Information Processing	Signal transduction;Signal transduction	ko04390//Hippo signaling pathway;ko04350//TGF-beta signaling pathway	K19631;K19631	-	-	-
LOC100622547	776	996	975	1381	1205	1155	29.8	33.33	32.25	41.72	38.51	40.75	31.7933	40.3267	0.34301	0.00010006	0.0011442	NASP	PREDICTED: nuclear autoantigenic sperm protein [Sus scrofa]	-	-	-	-	-	-	-
LOC100156543	751	843	928	821	868	617	51.59	48.85	54.41	43.1	47.87	37.21	51.6167	42.7267	-0.2727	0.000101227	0.00115644	OGFOD2	PREDICTED: 2-oxoglutarate and iron-dependent oxygenase domain-containing protein 2 [Sus scrofa]	-	-	-	-	-	-	-
LOC100152334	262	321	348	272	259	253	17.12	17.44	19.11	13.33	13.52	14.54	17.89	13.7967	-0.374834	0.000102681	0.00117084	RRNAD1	protein RRNAD1 [Sus scrofa]	-	-	-	-	-	-	-
LOC102158589	249	299	347	500	460	403	9.2	9.36	10.96	14.06	13.67	13.14	9.84	13.6233	0.46935	0.000103084	0.00117395	FBXL14	PREDICTED: F-box/LRR-repeat protein 14 isoform X1 [Bos taurus]	-	-	-	-	-	-	-
LOC100155321	237	273	238	217	212	179	16.39	16.01	14.07	11.43	11.8	10.93	15.49	11.3867	-0.443992	0.00010315	0.00117395	Acer2	PREDICTED: alkaline ceramidase 2 isoform X1 [Sus scrofa]	Metabolism;Environmental Information Processing;Metabolism	Global and overview maps;Signal transduction;Lipid metabolism	ko01100//Metabolic pathways;ko04071//Sphingolipid signaling pathway;ko00600//Sphingolipid metabolism	K01441;K01441;K01441	-	-	-
LOC100505387	780	892	1002	1302	1203	1148	13.48	12.88	14.5	17.11	16.45	16.54	13.62	16.7	0.294121	0.000103246	0.00117395	DICER1	endoribonuclease Dicer [Sus scrofa]	Human Diseases	Cancers	ko05206//MicroRNAs in cancer	K11592	-	-	-
LOC100523587	26	25	29	68	81	55	1.15	0.94	1.09	2.29	2.88	2.14	1.06	2.43667	1.20084	0.000104709	0.00118834	CD248	PREDICTED: endosialin [Sus scrofa]	-	-	-	-	-	-	-
LOC100518083	308	366	430	334	329	281	6.86	6.91	8.19	5.67	5.9	5.53	7.32	5.7	-0.360882	0.000107707	0.00121893	HERC5	PREDICTED: E3 ISG15--protein ligase HERC5 isoform X1 [Camelus bactrianus]	-	-	-	-	-	-	-
LOC100737860	337	400	366	574	517	539	7.41	7.4	6.86	9.65	9.21	10.42	7.22333	9.76	0.434216	0.000107833	0.00121921	EPN3	PREDICTED: epsin-3-like isoform X1 [Sus scrofa]	Cellular Processes	Transport and catabolism	ko04144//Endocytosis	K12471	-	-	-
LOC100624883	351	434	409	643	634	492	24.82	26.02	24.72	34.62	36.08	30.71	25.1867	33.8033	0.424505	0.000108038	0.00122038	CTDSP2	carboxy-terminal domain RNA polymerase II polypeptide A small phosphatase 2 [Sus scrofa]	-	-	-	-	-	-	-
LOC100524534	404	518	505	700	713	634	6.57	7.14	7.02	8.67	9.33	9.1	6.91	9.03333	0.386573	0.00010849	0.00122435	STK35	PREDICTED: serine/threonine-protein kinase 35 isoform X1 [Sus scrofa]	-	-	-	-	-	-	-
LOC733582	105	105	101	201	184	170	3.49	3.1	2.89	4.91	5.35	5.4	3.16	5.22	0.724125	0.000109242	0.00123167	CDS1	phosphatidate cytidylyltransferase 1 [Sus scrofa]	Metabolism;Metabolism;Environmental Information Processing	Global and overview maps;Lipid metabolism;Signal transduction	ko01100//Metabolic pathways;ko00564//Glycerophospholipid metabolism;ko04070//Phosphatidylinositol signaling system	K00981;K00981;K00981	-	-	-
LOC102162031	165	220	188	167	145	130	11.25	12.65	10.9	8.64	8.13	7.7	11.6	8.15667	-0.508073	0.000109374	0.00123201	PPM1J	PREDICTED: protein phosphatase 1J [Sus scrofa]	-	-	-	-	-	-	-
LOC100518165	328	338	394	336	277	293	7.53	6.58	7.78	6.07	5.1	5.97	7.29667	5.71333	-0.352905	0.000113018	0.0012695	C18orf25	PREDICTED: uncharacterized protein C18orf25 homolog isoform X1 [Sus scrofa]	-	-	-	-	-	-	-
LOC100152725	723	873	842	1272	1144	961	22.1	22.48	22.01	29.6	28.08	26.08	22.1967	27.92	0.330956	0.000113662	0.00127436	SMPD4	PREDICTED: sphingomyelin phosphodiesterase 4 isoform X1 [Sus scrofa]	Metabolism;Metabolism	Global and overview maps;Lipid metabolism	ko01100//Metabolic pathways;ko00600//Sphingolipid metabolism	K12353;K12353	-	-	-
LOC100519392	316	373	387	581	523	479	7.53	7.53	7.88	10.54	10.02	10.07	7.64667	10.21	0.41708	0.000115112	0.00128823	RAB36	PREDICTED: LOW QUALITY PROTEIN: ras-related protein Rab-36 [Sus scrofa]	-	-	-	-	-	-	-
LOC100620771	66	80	100	64	44	38	2.43	2.58	3.27	1.86	1.32	1.17	2.76	1.45	-0.928615	0.000116248	0.00129974	SYNC	PREDICTED: syncoilin isoform X1 [Sus scrofa]	-	-	-	-	-	-	-
LOC100152339	345	416	413	377	343	316	13.37	13.6	13.5	11.02	10.59	10.59	13.49	10.7333	-0.329792	0.000118089	0.0013191	ITPK1	inositol-tetrakisphosphate 1-kinase [Sus scrofa]	Metabolism;Environmental Information Processing;Metabolism	Global and overview maps;Signal transduction;Carbohydrate metabolism	ko01100//Metabolic pathways;ko04070//Phosphatidylinositol signaling system;ko00562//Inositol phosphate metabolism	K00913;K00913;K00913	-	-	-
LOC110260763	646	694	751	1018	965	913	10.68	9.72	10.62	12.81	12.86	13.35	10.34	13.0067	0.331015	0.000121872	0.00135759	GXYLT1	PREDICTED: glucoside xylosyltransferase 1 isoform X1 [Orcinus orca]	Metabolism	Glycan biosynthesis and metabolism	ko00514//Other types of O-glycan biosynthesis	K13676	-	-	-
LOC100154116	810	1018	943	1381	1210	1171	21.1	22.48	21	27.39	25.36	26.92	21.5267	26.5567	0.302949	0.000122071	0.00135854	Hip1r	PREDICTED: huntingtin-interacting protein 1-related protein [Sus scrofa]	-	-	-	-	-	-	-
LOC100144535	776	1000	946	1355	1211	1131	11.17	12.21	11.64	14.85	14.03	14.37	11.6733	14.4167	0.304521	0.000123337	0.00137011	RAB22A	ras-related protein Rab-22A [Sus scrofa]	Cellular Processes	Transport and catabolism	ko04144//Endocytosis	K07891	-	-	-
LOC100154701	518	603	578	859	832	707	25.19	24.8	24	31.79	32.54	30.34	24.6633	31.5567	0.355577	0.000124345	0.00138004	TRMT2A	PREDICTED: tRNA (uracil-5-)-methyltransferase homolog A [Sus scrofa]	-	-	-	-	-	-	-
LOC110258083	219	218	200	364	334	319	3.16	2.66	2.46	3.99	3.87	4.06	2.76	3.97333	0.525682	0.000126009	0.00139593	ABCA2	PREDICTED: ATP-binding cassette sub-family A member 2 [Odobenus rosmarus divergens]	Cellular Processes;Environmental Information Processing	Transport and catabolism;Membrane transport	ko04142//Lysosome;ko02010//ABC transporters	K05642;K05642	-	-	-
LOC100525050	144	178	182	305	291	230	6.11	6.41	6.61	9.81	9.89	8.65	6.37667	9.45	0.567512	0.000127894	0.00141422	LENG9	PREDICTED: leukocyte receptor cluster member 9 [Sus scrofa]	-	-	-	-	-	-	-
LOC100626835	254	287	287	441	451	370	12.74	12.33	12.36	16.81	18.14	16.35	12.4767	17.1	0.454764	0.000128357	0.00141804	Mall	mal, T-cell differentiation protein-like [Sus scrofa]	-	-	-	-	-	-	-
LOC100153486	628	840	713	779	649	574	30.44	34.51	29.53	28.74	25.31	24.55	31.4933	26.2	-0.26548	0.000129584	0.00142898	NFKBIE	PREDICTED: LOW QUALITY PROTEIN: NF-kappa-B inhibitor epsilon [Sus scrofa]	Human Diseases;Organismal Systems;Organismal Systems;Organismal Systems;Organismal Systems;Organismal Systems;Organismal Systems	Infectious diseases;Immune system;Nervous system;Immune system;Immune system;Immune system;Endocrine system	ko05169//Epstein-Barr virus infection;ko04659//Th17 cell differentiation;ko04722//Neurotrophin signaling pathway;ko04660//T cell receptor signaling pathway;ko04658//Th1 and Th2 cell differentiation;ko04662//B cell receptor signaling pathway;ko04920//Adipocytokine signaling pathway	K05872;K05872;K05872;K05872;K05872;K05872;K05872	-	-	-
LOC403154	168	164	174	292	263	274	3.72	3.08	3.06	4.96	4.63	5.04	3.28667	4.87667	0.56927	0.000131718	0.00145118	CFTR	cystic fibrosis transmembrane conductance regulator, ATP-binding cassette (sub-family C, member 7) [Sus scrofa]	Environmental Information Processing;Cellular Processes;Environmental Information Processing;Organismal Systems;Organismal Systems;Organismal Systems;Environmental Information Processing;Human Diseases	Signal transduction;Cellular community - eukaryotes;Signal transduction;Digestive system;Digestive system;Digestive system;Membrane transport;Infectious diseases	ko04024//cAMP signaling pathway;ko04530//Tight junction;ko04152//AMPK signaling pathway;ko04972//Pancreatic secretion;ko04976//Bile secretion;ko04971//Gastric acid secretion;ko02010//ABC transporters;ko05110//Vibrio cholerae infection	K05031;K05031;K05031;K05031;K05031;K05031;K05031;K05031	-	-	-
LOC100514624	90	90	129	66	61	71	4.14	3.39	4.9	2.23	2.18	2.86	4.14333	2.42333	-0.773799	0.000132153	0.00145465	NEK6	PREDICTED: serine/threonine-protein kinase Nek6 [Sus scrofa]	-	-	-	-	-	-	-
LOC100625733	15	24	23	5	7	3	0.32	0.44	0.42	0.08	0.12	0.06	0.393333	0.0866667	-2.1822	0.000132751	0.0014599	DSG3	PREDICTED: desmoglein-3 [Sus scrofa]	-	-	-	-	-	-	-
LOC110261260	420	511	545	475	453	407	40.73	42.01	45.17	35.07	35.34	34.83	42.6367	35.08	-0.281446	0.000134528	0.00147809	GCSH	PREDICTED: glycine cleavage system H protein, mitochondrial [Camelus bactrianus]	Metabolism;Metabolism;Metabolism;Metabolism	Global and overview maps;Global and overview maps;Amino acid metabolism;Carbohydrate metabolism	ko01100//Metabolic pathways;ko01200//Carbon metabolism;ko00260//Glycine, serine and threonine metabolism;ko00630//Glyoxylate and dicarboxylate metabolism	K02437;K02437;K02437;K02437	-	-	-
LOC100151782	239	266	273	446	396	350	6.65	6.28	6.49	9.45	8.87	8.6	6.47333	8.97333	0.471135	0.000134957	0.00148115	WBP1L	PREDICTED: WW domain binding protein 1-like isoform X1 [Sus scrofa]	-	-	-	-	-	-	-
LOC100153223	626	709	695	1029	867	955	11.34	11.47	10.38	14.27	12.55	15.32	11.0633	14.0467	0.344442	0.000135052	0.00148115	MAGI3	PREDICTED: membrane-associated guanylate kinase, WW and PDZ domain-containing protein 3 isoform X1 [Sus scrofa]	Environmental Information Processing	Signal transduction	ko04015//Rap1 signaling pathway	K06112	-	-	-
LOC100622540	213	281	260	406	380	369	6.68	7.37	6.95	9.64	9.62	10.21	7	9.82333	0.488858	0.000136259	0.0014913	C16orf62	PREDICTED: UPF0505 protein C16orf62 homolog isoform X1 [Physeter catodon]	-	-	-	-	-	-	-
LOC100155731	520	551	561	515	536	432	27.96	25.12	25.78	21.08	23.19	20.5	26.2867	21.59	-0.283968	0.000136644	0.00149318	COQ6	PREDICTED: ubiquinone biosynthesis monooxygenase COQ6, mitochondrial [Sus scrofa]	Metabolism;Metabolism	Global and overview maps;Metabolism of cofactors and vitamins	ko01100//Metabolic pathways;ko00130//Ubiquinone and other terpenoid-quinone biosynthesis	K06126;K06126	-	-	-
LOC100499507	142	181	221	355	262	286	3.48	4.41	5.1	7.6	6.02	6.56	4.33	6.72667	0.635525	0.000137075	0.00149604	AGO4	PREDICTED: protein argonaute-4 [Vicugna pacos]	-	-	-	-	-	-	-
LOC100512302	391	460	431	404	372	368	31.03	30.95	29.24	24.41	23.75	25.77	30.4067	24.6433	-0.30319	0.000137153	0.00149604	HABP4	intracellular hyaluronan-binding protein 4 [Sus scrofa]	-	-	-	-	-	-	-
LOC100157881	302	357	336	561	468	453	6.79	6.81	6.46	9.61	8.47	8.99	6.68667	9.02333	0.432373	0.000137913	0.00150296	URB2	PREDICTED: unhealthy ribosome biogenesis protein 2 homolog isoform X1 [Sus scrofa]	-	-	-	-	-	-	-
LOC100624059	229	296	304	421	447	394	5.83	6.22	6.6	8.1	9.09	9	6.21667	8.73	0.48984	0.0001385	0.001508	Taok2	PREDICTED: serine/threonine-protein kinase TAO2 isoform X3 [Canis lupus familiaris]	Environmental Information Processing	Signal transduction	ko04010//MAPK signaling pathway	K04429	-	-	-
LOC100512233	510	589	644	884	803	757	16.93	16.58	18.27	22.34	21.45	22.18	17.26	21.99	0.349415	0.000138851	0.00151033	IRF2BP1	PREDICTED: interferon regulatory factor 2-binding protein 1 [Sus scrofa]	-	-	-	-	-	-	-
LOC100511697	401	475	466	396	417	385	13.39	13.44	13.3	10.06	11.2	11.34	13.3767	10.8667	-0.299809	0.000142319	0.00153985	Cblc	PREDICTED: E3 ubiquitin-protein ligase CBL-C isoform X1 [Sus scrofa]	Cellular Processes;Genetic Information Processing	Transport and catabolism;Folding, sorting and degradation	ko04144//Endocytosis;ko04120//Ubiquitin mediated proteolysis	K22518;K22518	-	-	-
LOC100623582	438	422	471	397	427	344	24.75	20.27	22.81	17.1	19.33	17.14	22.61	17.8567	-0.340498	0.000144092	0.00155486	NBL1	PREDICTED: neuroblastoma suppressor of tumorigenicity 1 isoform X1 [Lipotes vexillifer]	Environmental Information Processing	Signal transduction	ko04350//TGF-beta signaling pathway	K19558	-	-	-
LOC100524882	50	91	75	164	130	126	1.22	1.88	1.56	3.04	2.54	2.7	1.55333	2.76	0.829301	0.000145078	0.0015641	PRSS12	PREDICTED: neurotrypsin [Sus scrofa]	-	-	-	-	-	-	-
LOC100153163	403	449	460	451	379	342	23.45	22.13	22.86	19.99	17.74	17.56	22.8133	18.43	-0.307821	0.000145651	0.00156747	MICB	PREDICTED: MHC class I polypeptide-related sequence B-like isoform X1 [Sus scrofa]	Human Diseases;Organismal Systems	Infectious diseases;Immune system	ko05167//Kaposi sarcoma-associated herpesvirus infection;ko04650//Natural killer cell mediated cytotoxicity	K07985;K07985	-	-	-
LOC397018	590	639	618	943	857	788	26.03	23.9	23.31	31.68	30.42	30.68	24.4133	30.9267	0.341182	0.00014793	0.00159058	SCARB1	scavenger receptor class B member 1 [Sus scrofa]	Human Diseases;Cellular Processes;Human Diseases;Organismal Systems;Organismal Systems;Organismal Systems;Organismal Systems;Organismal Systems;Organismal Systems;Organismal Systems	Endocrine and metabolic diseases;Transport and catabolism;Infectious diseases;Digestive system;Endocrine system;Endocrine system;Endocrine system;Digestive system;Digestive system;Digestive system	ko04934//Cushing syndrome;ko04145//Phagosome;ko05160//Hepatitis C;ko04976//Bile secretion;ko04925//Aldosterone synthesis and secretion;ko04927//Cortisol synthesis and secretion;ko04913//Ovarian Steroidogenesis;ko04979//Cholesterol metabolism;ko04975//Fat digestion and absorption;ko04977//Vitamin digestion and absorption	K13885;K13885;K13885;K13885;K13885;K13885;K13885;K13885;K13885;K13885	-	-	-
LOC100192435	246	278	303	233	222	233	19.75	18.92	20.79	14.24	14.34	16.51	19.82	15.03	-0.399112	0.000149967	0.00161104	ERO1A	ERO1-like protein alpha precursor [Sus scrofa]	Genetic Information Processing;Human Diseases	Folding, sorting and degradation;Infectious diseases	ko04141//Protein processing in endoplasmic reticulum;ko05110//Vibrio cholerae infection	K10950;K10950	-	-	-
LOC100511000	338	406	373	322	361	281	16.88	16.84	15.61	11.88	13.53	11.81	16.4433	12.4067	-0.406387	0.000150721	0.00161771	MUS81	PREDICTED: crossover junction endonuclease MUS81 [Sus scrofa]	Genetic Information Processing;Genetic Information Processing	Replication and repair;Replication and repair	ko03460//Fanconi anemia pathway;ko03440//Homologous recombination	K08991;K08991	-	-	-
LOC100523416	418	463	494	714	694	573	18.61	17.49	18.85	24.23	24.88	22.49	18.3167	23.8667	0.38184	0.000156331	0.00166901	UTP14A	PREDICTED: U3 small nucleolar RNA-associated protein 14 homolog A isoform X1 [Sus scrofa]	Genetic Information Processing	Translation	ko03008//Ribosome biogenesis in eukaryotes	K14567	-	-	-
LOC100511736	142	211	180	338	295	242	5.76	7.21	6.28	10.39	9.58	8.69	6.41667	9.55333	0.57418	0.000157973	0.00168504	AP5B1	PREDICTED: AP-5 complex subunit beta-1 [Sus scrofa]	-	-	-	-	-	-	-
LOC102166900	754	954	895	1381	1189	1026	28.12	30.16	28.52	39.2	35.67	33.76	28.9333	36.21	0.323656	0.000158698	0.00168979	Rrm1	PREDICTED: ribonucleoside-diphosphate reductase large subunit [Ovis aries]	Metabolism;Metabolism;Metabolism;Metabolism;Metabolism	Global and overview maps;Nucleotide metabolism;Nucleotide metabolism;Xenobiotics biodegradation and metabolism;Metabolism of other amino acids	ko01100//Metabolic pathways;ko00230//Purine metabolism;ko00240//Pyrimidine metabolism;ko00983//Drug metabolism - other enzymes;ko00480//Glutathione metabolism	K10807;K10807;K10807;K10807;K10807	-	-	-
LOC100621829	411	506	542	453	418	437	7.48	7.8	8.44	6.27	6.12	7.03	7.90667	6.47333	-0.288561	0.000159959	0.00170172	RNF13	PREDICTED: E3 ubiquitin-protein ligase RNF13 isoform X1 [Sus scrofa]	-	-	-	-	-	-	-
LOC100625524	61	63	91	135	150	130	4.14	3.51	5.21	6.83	8.07	7.66	4.28667	7.52	0.810876	0.00016454	0.00174736	SSBP4	PREDICTED: single-stranded DNA-binding protein 4 isoform X8 [Homo sapiens]	-	-	-	-	-	-	-
LOC100513839	460	531	587	769	769	694	24.4	23.88	26.61	31.05	32.82	32.48	24.9633	32.1167	0.363512	0.000170232	0.00179832	Wdr34	PREDICTED: WD repeat-containing protein 34 [Sus scrofa]	-	-	-	-	GO:0005815//microtubule organizing center;GO:0044441//ciliary part	-	-
LOC100522568	627	707	716	979	958	886	5.87	5.61	5.74	7.01	7.23	7.32	5.74	7.18667	0.324272	0.000172391	0.00181953	PLXDC2	PREDICTED: plexin domain-containing protein 2 isoform X1 [Orcinus orca]	-	-	-	-	-	-	-
LOC100525287	510	566	550	866	746	690	11.96	11.06	10.95	15.2	13.95	14.03	11.3233	14.3933	0.346102	0.000175705	0.00185289	GRHL2	PREDICTED: grainyhead-like protein 2 homolog isoform X1 [Vicugna pacos]	-	-	-	-	-	-	-
LOC100517201	400	484	465	688	636	599	13.5	13.85	13.41	17.68	17.27	17.84	13.5867	17.5967	0.373111	0.000176339	0.00185795	XRN2	PREDICTED: 5'-3' exoribonuclease 2 [Sus scrofa]	Genetic Information Processing;Genetic Information Processing	Folding, sorting and degradation;Translation	ko03018//RNA degradation;ko03008//Ribosome biogenesis in eukaryotes	K12619;K12619	-	-	-
LOC100519270	232	322	303	438	465	396	14.74	17.35	16.39	21.09	23.74	22.12	16.16	22.3167	0.465694	0.000178416	0.00187493	MLX	PREDICTED: max-like protein X isoform X1 [Sus scrofa]	Human Diseases;Human Diseases	Endocrine and metabolic diseases;Endocrine and metabolic diseases	ko04932//Non-alcoholic fatty liver disease (NAFLD);ko04931//Insulin resistance	K09113;K09113	-	-	-
LOC100153902	51	67	57	40	25	30	7.84	8.73	7.49	4.68	3.09	4.07	8.02	3.94667	-1.02297	0.000186021	0.00194878	--	PREDICTED: interferon, alpha-inducible protein 27 isoform X1 [Equus caballus]	-	-	-	-	-	-	-
LOC100523848	78	118	78	52	69	47	4.27	5.47	3.65	2.17	3.04	2.27	4.46333	2.49333	-0.840046	0.000186915	0.00195414	SIGLEC11	PREDICTED: LOW QUALITY PROTEIN: sialic acid-binding Ig-like lectin 11 [Sus scrofa]	-	-	-	-	-	-	-
LOC100621038	620	720	784	997	1023	914	24.35	24.09	26.71	30.04	32.1	32.14	25.05	31.4267	0.327179	0.000186926	0.00195414	DVL3	PREDICTED: segment polarity protein dishevelled homolog DVL-3 isoform X3 [Galeopterus variegatus]	Human Diseases;Human Diseases;Human Diseases;Human Diseases;Human Diseases;Environmental Information Processing;Environmental Information Processing;Human Diseases;Human Diseases;Cellular Processes;Environmental Information Processing;Organismal Systems;Human Diseases;Environmental Information Processing	Cancers;Infectious diseases;Infectious diseases;Cancers;Endocrine and metabolic diseases;Signal transduction;Signal transduction;Cancers;Cancers;Cellular community - eukaryotes;Signal transduction;Endocrine system;Cancers;Signal transduction	ko05200//Pathways in cancer;ko05165//Human papillomavirus infection;ko05166//HTLV-I infection;ko05225//Hepatocellular carcinoma;ko04934//Cushing syndrome;ko04390//Hippo signaling pathway;ko04150//mTOR signaling pathway;ko05226//Gastric cancer;ko05224//Breast cancer;ko04550//Signaling pathways regulating pluripotency of stem cells;ko04310//Wnt signaling pathway;ko04916//Melanogenesis;ko05217//Basa…	K02353;K02353;K02353;K02353;K02353;K02353;K02353;K02353;K02353;K02353;K02353;K02353;K02353;K02353	-	-	-
LOC100627329	461	456	502	709	698	634	26.88	22.11	23.91	31.23	32.6	31.87	24.3	31.9	0.3926	0.000187297	0.00195632	SSBP3	PREDICTED: single-stranded DNA-binding protein 3 [Bubalus bubalis]	-	-	-	-	-	-	-
LOC100738902	52	65	99	36	46	38	3.49	3.7	5.65	1.82	2.49	2.23	4.28	2.18	-0.973283	0.000188455	0.00196671	IL17D	PREDICTED: interleukin-17D [Sus scrofa]	Environmental Information Processing;Environmental Information Processing;Organismal Systems;Organismal Systems;Organismal Systems	Signaling molecules and interaction;Signal transduction;Immune system;Immune system;Immune system	ko04060//Cytokine-cytokine receptor interaction;ko04630//Jak-STAT signaling pathway;ko04659//Th17 cell differentiation;ko04625//C-type lectin receptor signaling pathway;ko04657//IL-17 signaling pathway	K05492;K05492;K05492;K05492;K05492	-	-	-
LOC100522261	395	416	464	390	380	367	12.63	11.28	12.68	9.49	9.78	10.36	12.1967	9.87667	-0.304391	0.000189965	0.00198076	PGM2	PREDICTED: phosphoglucomutase-2 [Sus scrofa]	Metabolism;Metabolism;Metabolism;Metabolism;Metabolism;Metabolism;Metabolism	Global and overview maps;Nucleotide metabolism;Carbohydrate metabolism;Carbohydrate metabolism;Carbohydrate metabolism;Carbohydrate metabolism;Carbohydrate metabolism	ko01100//Metabolic pathways;ko00230//Purine metabolism;ko00010//Glycolysis / Gluconeogenesis;ko00520//Amino sugar and nucleotide sugar metabolism;ko00500//Starch and sucrose metabolism;ko00052//Galactose metabolism;ko00030//Pentose phosphate pathway	K15779;K15779;K15779;K15779;K15779;K15779;K15779	-	-	-
LOC100524016	201	221	244	368	380	296	15.03	14.01	15.59	20.95	22.86	19.53	14.8767	21.1133	0.505103	0.000190285	0.00198238	Msln	PREDICTED: mesothelin [Sus scrofa]	-	-	-	-	-	-	-
LOC100512202	305	338	382	345	273	265	18.17	17.89	22.17	17.82	14.74	15.04	19.41	15.8667	-0.290801	0.000192363	0.00200058	TSPAN12	tetraspanin-12 [Sus scrofa]	-	-	-	-	-	-	-
LOC100620470	101	102	126	205	176	194	5.78	4.92	6.13	8.92	8.05	9.8	5.61	8.92333	0.669582	0.000195616	0.0020309	HSD17B6	PREDICTED: 17-beta-hydroxysteroid dehydrogenase type 6 [Sus scrofa]	Metabolism;Metabolism;Metabolism	Global and overview maps;Metabolism of cofactors and vitamins;Lipid metabolism	ko01100//Metabolic pathways;ko00830//Retinol metabolism;ko00140//Steroid hormone biosynthesis	K13369;K13369;K13369	-	-	-
LOC100511935	167	185	166	304	269	262	9.92	9.29	8.39	13.7	12.79	13.69	9.2	13.3933	0.541809	0.000198426	0.00205831	SYTL1	PREDICTED: synaptotagmin-like protein 1 isoform X1 [Sus scrofa]	-	-	-	-	-	-	-
LOC100514568	203	225	240	205	177	163	10.16	9.55	10.27	7.81	7.13	7.2	9.99333	7.38	-0.437345	0.000203475	0.00210887	Tmem38a	PREDICTED: trimeric intracellular cation channel type A [Camelus ferus]	-	-	-	-	GO:0005789//endoplasmic reticulum membrane;GO:0031224//intrinsic component of membrane;GO:0031988//membrane-bounded vesicle	GO:0005227//calcium activated cation channel activity	GO:0030001//metal ion transport;GO:0034220//ion transmembrane transport
LOC100514109	133	158	171	109	112	122	8.66	8.72	9.52	5.4	5.87	7.01	8.96667	6.09333	-0.55734	0.000207894	0.00215282	SMPDL3B	PREDICTED: acid sphingomyelinase-like phosphodiesterase 3b [Sus scrofa]	-	-	-	-	GO:0031988//membrane-bounded vesicle;GO:0044421//extracellular region part	GO:0003824//catalytic activity	GO:0006684//sphingomyelin metabolic process
LOC100141310	271	372	383	303	267	299	16.62	19.24	20.1	14.18	13.19	16.08	18.6533	14.4833	-0.36504	0.00020922	0.00216469	PBK	lymphokine-activated killer T-cell-originated protein kinase [Sus scrofa]	-	-	-	-	-	-	-
MSTRG.15465	17	22	19	6	2	6	1.42	1.56	1.36	0.38	0.13	0.44	1.44667	0.316667	-2.1917	0.000210843	0.00217962	--	PREDICTED: mitochondrial inner membrane protein COX18 isoform X1 [Sus scrofa]	-	-	-	-	-	-	-
LOC397691	147	266	212	146	189	114	19.18	29.42	23.64	14.5	19.84	13.13	24.08	15.8233	-0.605782	0.000212083	0.00218868	APOA1	apolipoprotein A-I [Sus scrofa]	Organismal Systems;Organismal Systems;Organismal Systems;Human Diseases;Organismal Systems	Endocrine system;Digestive system;Digestive system;Infectious diseases;Digestive system	ko03320//PPAR signaling pathway;ko04979//Cholesterol metabolism;ko04975//Fat digestion and absorption;ko05143//African trypanosomiasis;ko04977//Vitamin digestion and absorption	K08757;K08757;K08757;K08757;K08757	-	-	-
LOC100523528	354	501	418	350	329	397	14.8	17.74	14.94	11.05	11.05	14.62	15.8267	12.24	-0.370754	0.000214431	0.00221102	CASC4	PREDICTED: protein CASC4 isoform X1 [Tursiops truncatus]	-	-	-	-	-	-	-
LOC100518065	865	979	983	1370	1247	1175	29.75	28.51	28.85	35.81	34.47	35.62	29.0367	35.3	0.281792	0.000214909	0.00221325	Slc20a1	PREDICTED: sodium-dependent phosphate transporter 1 isoform X1 [Ursus maritimus]	-	-	-	-	-	-	-
LOC100624619	478	503	529	513	470	394	13.51	12.34	13.82	12.04	10.21	9.6	13.2233	10.6167	-0.316755	0.000215014	0.00221325	EFNB1	PREDICTED: ephrin-B1 [Physeter catodon]	Organismal Systems	Development	ko04360//Axon guidance	K05463	-	-	-
LOC100518917	341	369	369	329	276	326	20.74	19.02	19.18	15.23	13.5	17.49	19.6467	15.4067	-0.35073	0.000220406	0.00226488	PARP2	PREDICTED: poly [ADP-ribose] polymerase 2 [Sus scrofa]	Cellular Processes;Cellular Processes;Environmental Information Processing;Genetic Information Processing	Cell growth and death;Cell growth and death;Signal transduction;Replication and repair	ko04217//Necroptosis;ko04210//Apoptosis;ko04064//NF-kappa B signaling pathway;ko03410//Base excision repair	K10798;K10798;K10798;K10798	-	-	-
LOC110261156	157	178	176	322	257	247	4.18	4.02	4	6.53	5.51	5.8	4.06667	5.94667	0.548234	0.000221675	0.00227599	KIAA0754	PREDICTED: microtubule-actin cross-linking factor 1 isoform X9 [Capra hircus]	-	-	-	-	-	-	-
LOC106504109	463	531	496	461	474	424	32.08	31.19	29.37	24.32	26.42	25.93	30.88	25.5567	-0.272973	0.000222179	0.00227923	HMCES	PREDICTED: embryonic stem cell-specific 5-hydroxymethylcytosine-binding protein [Sus scrofa]	-	-	-	-	-	-	-
LOC102165373	83	88	90	166	166	139	5.45	4.89	5.05	8.29	8.76	8.05	5.13	8.36667	0.705694	0.000222797	0.00228363	LURAP1L	PREDICTED: leucine rich adaptor protein 1-like [Sus scrofa]	-	-	-	-	-	-	-
LOC100135037	144	152	122	106	101	97	11.94	10.74	8.66	6.69	6.69	7.03	10.4467	6.80333	-0.618729	0.000227607	0.00232897	HLA-B	MHC class I antigen [Sus scrofa]	Human Diseases;Human Diseases;Human Diseases;Cellular Processes;Human Diseases;Human Diseases;Human Diseases;Human Diseases;Cellular Processes;Cellular Processes;Environmental Information Processing;Organismal Systems;Human Diseases;Organismal Systems;Human Diseases;Human Diseases;Human Diseases;Human Diseases	Infectious diseases;Infectious diseases;Infectious diseases;Transport and catabolism;Infectious diseases;Infectious diseases;Infectious diseases;Cancers;Cell growth and death;Transport and catabolism;Signaling molecules and interaction;Immune system;Cardiovascular diseases;Immune system;Immune diseases;Endocrine and metabolic diseases;Immune diseases;Immune diseases	ko05165//Human papillomavirus infection;ko05166//HTLV-I infection;ko05163//Human cytomegalovirus infection;ko04144//Endocytosis;ko05168//Herpes simplex infection;ko05169//Epstein-Barr virus infection;ko05167//Kaposi sarcoma-associated herpesvirus infection;ko05203//Viral carcinogenesis;ko04218//Cellular senescence;ko04145//Phagosome;ko04514//Cell adhesion molecules (CAMs);ko04650//Natural killer …	K06751;K06751;K06751;K06751;K06751;K06751;K06751;K06751;K06751;K06751;K06751;K06751;K06751;K06751;K06751;K06751;K06751;K06751	-	-	-
LOC100627864	255	338	321	254	247	269	17.28	19.39	18.49	13.09	13.5	16.02	18.3867	14.2033	-0.37243	0.000240533	0.00245498	LAT2	PREDICTED: linker for activation of T-cells family member 2 isoform X2 [Sus scrofa]	-	-	-	-	-	-	-
LOC100515017	982	1122	1034	1552	1346	1327	10.53	10.2	9.48	12.67	11.62	12.56	10.07	12.2833	0.286638	0.000241356	0.0024613	TNRC18	PREDICTED: LOW QUALITY PROTEIN: trinucleotide repeat-containing gene 18 protein [Bubalus bubalis]	-	-	-	-	-	-	-
LOC497237	188	182	192	321	281	295	9.13	7.49	7.97	11.87	10.98	12.64	8.19667	11.83	0.529341	0.000246696	0.00250939	SCG2	secretogranin-2 precursor [Sus scrofa]	-	-	-	-	-	-	-
LOC106504473	19	28	10	65	54	45	0.17	0.25	0.07	0.5	0.41	0.42	0.163333	0.443333	1.44057	0.00024752	0.00251565	ZFHX2	PREDICTED: zinc finger homeobox protein 2 [Lipotes vexillifer]	-	-	-	-	-	-	-
LOC100524513	224	262	279	400	417	346	5.76	5.71	6.13	7.83	8.63	7.85	5.86667	8.10333	0.465974	0.000248126	0.00251969	CAPN5	PREDICTED: calpain-5 [Sus scrofa]	-	-	-	-	-	-	-
LOC100517041	467	468	519	786	644	663	18.08	15.36	17.17	23.17	20.06	22.65	16.87	21.96	0.380418	0.000249937	0.00253595	Dhx15	PREDICTED: pre-mRNA-splicing factor ATP-dependent RNA helicase DHX15 [Orcinus orca]	Genetic Information Processing	Transcription	ko03040//Spliceosome	K12820	-	-	-
LOC100524087	364	364	428	594	543	555	3.62	3.06	3.63	4.49	4.34	4.87	3.43667	4.56667	0.410132	0.000253444	0.00256721	UTP20	PREDICTED: small subunit processome component 20 homolog [Sus scrofa]	-	-	-	-	-	-	-
LOC397576	140	131	109	207	223	240	14.81	11.75	9.86	16.67	18.98	22.41	12.14	19.3533	0.672814	0.000253728	0.00256793	APOE	apolipoprotein-E [Sus scrofa]	Human Diseases;Organismal Systems	Neurodegenerative diseases;Digestive system	ko05010//Alzheimer disease;ko04979//Cholesterol metabolism	K04524;K04524	-	-	-
LOC100151831	277	343	316	526	437	427	28.53	29.94	27.81	41.24	36.21	38.81	28.76	38.7533	0.430257	0.000256205	0.00258866	IMP3	U3 small nucleolar ribonucleoprotein protein IMP3 [Sus scrofa]	Genetic Information Processing	Translation	ko03008//Ribosome biogenesis in eukaryotes	K14560	-	-	-
LOC100520717	70	86	64	49	49	35	4.53	4.71	3.54	2.41	2.55	2	4.26	2.32	-0.876729	0.000258016	0.0026026	YPEL4	protein yippee-like 4 [Homo sapiens]	-	-	-	-	-	-	-
LOC100620715	42	69	72	133	108	118	2.33	3.22	3.43	5.59	4.78	5.76	2.99333	5.37667	0.844959	0.000258961	0.00260994	WDR4	PREDICTED: tRNA (guanine-N(7)-)-methyltransferase non-catalytic subunit WDR4 isoform X1 [Sus scrofa]	-	-	-	-	-	-	-
LOC100152269	154	176	168	245	276	301	3.72	3.57	3.5	4.53	5.32	6.34	3.59667	5.39667	0.585408	0.000261797	0.00263567	FBRSL1	PREDICTED: fibrosin-1-like protein isoform X18 [Ovis aries musimon]	-	-	-	-	-	-	-
LOC100152515	586	702	720	1017	868	882	9.02	9.22	9.76	12.16	10.88	12.12	9.33333	11.72	0.328508	0.000261951	0.00263567	PITPNM2	PREDICTED: membrane-associated phosphatidylinositol transfer protein 2 isoform X1 [Sus scrofa]	-	-	-	-	-	-	-
LOC100621493	712	867	905	1172	1160	1032	49.84	51.45	54.14	62.45	65.33	63.75	51.81	63.8433	0.301305	0.000265673	0.00266424	LYPLA2	PREDICTED: acyl-protein thioesterase 2 isoform X2 [Sus scrofa]	Metabolism	Lipid metabolism	ko00564//Glycerophospholipid metabolism	K06130	-	-	-
LOC100739292	60	89	76	158	137	123	2.3	2.9	2.49	4.62	4.23	4.17	2.56333	4.34	0.759674	0.000266502	0.00267033	TMPRSS2	transmembrane protease, serine 2 [Sus scrofa]	Human Diseases;Human Diseases;Human Diseases	Infectious diseases;Cancers;Cancers	ko05164//Influenza A;ko05202//Transcriptional misregulation in cancers;ko05215//Prostate cancer	K09633;K09633;K09633	-	-	-
LOC100526114	311	368	383	346	319	270	8.27	8.3	8.71	7	6.83	6.34	8.42667	6.72333	-0.325785	0.000269264	0.00269354	CABLES1	PREDICTED: CDK5 and ABL1 enzyme substrate 1 [Tursiops truncatus]	-	-	-	-	-	-	-
LOC110260738	180	228	190	174	155	149	11.23	12.06	10.13	8.27	7.78	8.21	11.14	8.08667	-0.462132	0.000275946	0.00275809	MANSC1	PREDICTED: MANSC domain-containing protein 1 [Camelus dromedarius]	-	-	-	-	-	-	-
LOC100155091	613	631	577	628	564	480	15.91	13.89	12.8	12.41	11.78	11	14.2	11.73	-0.275688	0.000276514	0.00276148	ITGA5	PREDICTED: integrin alpha-5 [Sus scrofa]	Environmental Information Processing;Human Diseases;Cellular Processes;Human Diseases;Cellular Processes;Human Diseases;Cellular Processes;Organismal Systems;Human Diseases;Human Diseases;Environmental Information Processing;Human Diseases;Human Diseases;Human Diseases;Human Diseases	Signal transduction;Infectious diseases;Cell motility;Cancers;Cellular community - eukaryotes;Cancers;Transport and catabolism;Immune system;Cardiovascular diseases;Cardiovascular diseases;Signaling molecules and interaction;Infectious diseases;Infectious diseases;Cardiovascular diseases;Infectious diseases	ko04151//PI3K-Akt signaling pathway;ko05165//Human papillomavirus infection;ko04810//Regulation of actin cytoskeleton;ko05205//Proteoglycans in cancer;ko04510//Focal adhesion;ko05206//MicroRNAs in cancer;ko04145//Phagosome;ko04640//Hematopoietic cell lineage;ko05414//Dilated cardiomyopathy (DCM);ko05410//Hypertrophic cardiomyopathy (HCM);ko04512//ECM-receptor interaction;ko05133//Pertussis;ko0510…	K06484;K06484;K06484;K06484;K06484;K06484;K06484;K06484;K06484;K06484;K06484;K06484;K06484;K06484;K06484	-	-	-
LOC100152703	856	910	926	1329	1228	1090	15.74	14.23	14.53	18.6	18.15	17.69	14.8333	18.1467	0.290862	0.000280199	0.00279597	EXTL3	PREDICTED: exostosin-like 3 [Sus scrofa]	Metabolism;Metabolism	Global and overview maps;Glycan biosynthesis and metabolism	ko01100//Metabolic pathways;ko00534//Glycosaminoglycan biosynthesis - heparan sulfate / heparin	K02370;K02370	-	-	-
LOC100519060	300	331	323	483	439	516	5.39	5.04	4.97	6.61	6.37	8.21	5.13333	7.06333	0.460453	0.000280912	0.00280076	OTULIN	PREDICTED: ubiquitin thioesterase otulin isoform X1 [Sus scrofa]	-	-	-	-	-	-	-
LOC100154113	226	269	276	386	434	355	5.86	5.95	6.16	7.68	9.11	8.18	5.99	8.32333	0.474605	0.000281929	0.00280858	--	PREDICTED: LOW QUALITY PROTEIN: uncharacterized protein C15orf39 homolog [Sus scrofa]	-	-	-	-	-	-	-
LOC100518537	721	955	861	1213	1169	1059	13.65	15.33	13.93	17.48	17.81	17.69	14.3033	17.66	0.304134	0.000295541	0.00293691	GNA15	guanine nucleotide-binding protein subunit alpha-15 [Bos taurus]	Environmental Information Processing;Organismal Systems;Human Diseases;Human Diseases	Signal transduction;Endocrine system;Infectious diseases;Infectious diseases	ko04020//Calcium signaling pathway;ko04926//Relaxin signaling pathway;ko05142//Chagas disease (American trypanosomiasis);ko05146//Amoebiasis	K04637;K04637;K04637;K04637	-	-	-
LOC100514409	1054	1185	1218	1713	1526	1360	43.86	41.8	43.32	54.27	51.09	49.94	42.9933	51.7667	0.26791	0.000296535	0.00294436	PPP6R1	PREDICTED: serine/threonine-protein phosphatase 6 regulatory subunit 1 isoform X4 [Sus scrofa]	-	-	-	-	-	GO:0019902//phosphatase binding	GO:0010921//regulation of phosphatase activity
LOC100520196	570	653	628	951	863	755	32.31	31.38	30.43	41.04	39.36	37.77	31.3733	39.39	0.328291	0.000298813	0.00296454	LTBR	tumor necrosis factor receptor superfamily member 3 precursor [Sus scrofa]	Environmental Information Processing;Human Diseases;Human Diseases;Environmental Information Processing;Environmental Information Processing;Organismal Systems	Signaling molecules and interaction;Infectious diseases;Cancers;Signal transduction;Signal transduction;Immune system	ko04060//Cytokine-cytokine receptor interaction;ko05166//HTLV-I infection;ko05203//Viral carcinogenesis;ko04064//NF-kappa B signaling pathway;ko04066//HIF-1 signaling pathway;ko04672//Intestinal immune network for IgA production	K03159;K03159;K03159;K03159;K03159;K03159	-	-	-
LOC100523886	647	739	695	1004	978	873	27.2	26.33	24.97	32.13	33.08	32.38	26.1667	32.53	0.314041	0.000302119	0.00299241	SF1	PREDICTED: splicing factor 1 isoform X1 [Sus scrofa]	-	-	-	-	-	-	-
LOC100517795	365	438	431	382	369	360	19.09	19.35	19	15.13	15.46	16.59	19.1467	15.7267	-0.28388	0.000304147	0.00301004	Ap1s2	PREDICTED: AP-1 complex subunit sigma-2 isoform X1 [Pan troglodytes]	Cellular Processes	Transport and catabolism	ko04142//Lysosome	K12394	-	-	-
LOC100517886	208	178	219	325	332	309	6.25	4.57	5.43	7.32	8.08	8.24	5.41667	7.88	0.54079	0.000305118	0.0030147	PTCD3	PREDICTED: pentatricopeptide repeat domain-containing protein 3, mitochondrial isoform X1 [Sus scrofa]	-	-	-	-	-	-	-
LOC100736965	422	467	450	667	664	578	14.86	13.94	13.54	17.88	18.81	17.96	14.1133	18.2167	0.3682	0.000308307	0.00304371	HID1	PREDICTED: protein HID1 isoform X1 [Sus scrofa]	-	-	-	-	-	-	-
LOC100626004	724	838	811	1085	1095	1048	46.1	45.22	44.13	52.59	56.1	58.88	45.15	55.8567	0.307003	0.0003118	0.00307317	SERINC2	serine incorporator 2 precursor [Sus scrofa]	-	-	-	-	-	-	-
LOC100513379	92	132	121	212	178	199	2.25	2.87	2.56	4.15	3.64	4.42	2.56	4.07	0.668885	0.000313095	0.00308341	MORC3	PREDICTED: MORC family CW-type zinc finger protein 3 [Sus scrofa]	-	-	-	-	-	-	-
LOC100152306	370	446	424	375	384	356	72.42	74	70.93	55.88	60.31	61.49	72.45	59.2267	-0.290739	0.000316406	0.00311348	IFI27L2	PREDICTED: interferon alpha-inducible protein 27-like protein 2 [Sus scrofa]	-	-	-	-	-	-	-
LOC100151787	561	711	651	1017	864	791	4.13	4.44	4.1	5.7	5.12	5.14	4.22333	5.32	0.333044	0.000325144	0.00319425	HECTD4	PREDICTED: probable E3 ubiquitin-protein ligase HECTD4 isoform X1 [Sus scrofa]	-	-	-	-	-	-	-
LOC102161291	420	527	494	691	687	654	11.52	12.22	11.57	14.41	15.14	15.83	11.77	15.1267	0.36198	0.000327553	0.0032153	EPN2	PREDICTED: epsin-2 isoform X2 [Aotus nancymaae]	Cellular Processes	Transport and catabolism	ko04144//Endocytosis	K12471	-	-	-
LOC100622907	163	150	169	265	258	260	6.36	4.96	5.64	7.87	8.1	8.95	5.65333	8.30667	0.555168	0.000343241	0.00336108	WDR73	PREDICTED: WD repeat-containing protein 73, partial [Sus scrofa]	-	-	-	-	-	-	-
LOC100524712	7	22	14	36	61	38	0.11	0.27	0.18	0.41	0.71	0.49	0.186667	0.536667	1.52356	0.000349429	0.00341614	PIGZ	PREDICTED: GPI mannosyltransferase 4 isoform X1 [Sus scrofa]	Metabolism	Glycan biosynthesis and metabolism	ko00563//Glycosylphosphatidylinositol(GPI)-anchor biosynthesis	K08098	-	-	-
LOC100511399	55	74	70	48	43	26	2.23	2.55	2.43	1.48	1.41	0.95	2.40333	1.28	-0.908893	0.000351011	0.00342605	COQ8A	PREDICTED: chaperone activity of bc1 complex-like, mitochondrial isoform X1 [Balaenoptera acutorostrata scammoni]	-	-	-	-	-	-	-
LOC100158186	446	512	523	493	404	453	18.1	15.64	15.99	13.34	13.04	14.87	16.5767	13.75	-0.269722	0.00035233	0.00343614	Tial1	nucleolysin TIAR isoform 2 [Homo sapiens]	-	-	-	-	-	-	-
LOC100154391	74	75	63	134	137	127	1.36	1.16	1	1.89	2.04	2.11	1.17333	2.01333	0.778973	0.000352925	0.00343916	KCNQ5	PREDICTED: potassium voltage-gated channel subfamily KQT member 5 isoform X1 [Sus scrofa]	Organismal Systems	Nervous system	ko04725//Cholinergic synapse	K04930	-	-	-
MSTRG.1207	200	241	180	170	167	157	91.28	93.2	70.02	58.88	61.38	62.98	84.8333	61.08	-0.473931	0.000360492	0.00350724	--	PREDICTED: mitochondrial inner membrane protein COX18 isoform X1 [Sus scrofa]	-	-	-	-	-	-	-
LOC100627450	151	139	179	285	228	261	2.13	1.68	2.17	3.07	2.6	3.26	1.99333	2.97667	0.578515	0.000362375	0.00352271	FAM208A	PREDICTED: protein FAM208A isoform X1 [Sus scrofa]	-	-	-	-	-	-	-
LOC100524195	209	211	208	354	332	291	8.23	7.06	7.02	10.64	10.55	10.14	7.43667	10.4433	0.489854	0.000364396	0.00353951	B3GNT2	PREDICTED: N-acetyllactosaminide beta-1,3-N-acetylglucosaminyltransferase 2 [Sus scrofa]	Metabolism;Metabolism;Metabolism	Global and overview maps;Glycan biosynthesis and metabolism;Glycan biosynthesis and metabolism	ko01100//Metabolic pathways;ko00601//Glycosphingolipid biosynthesis - lacto and neolacto series;ko00533//Glycosaminoglycan biosynthesis - keratan sulfate	K00741;K00741;K00741	-	-	-
LOC396720	189	202	200	167	175	133	15.88	14.4	14.27	10.66	11.78	9.8	14.85	10.7467	-0.466574	0.000364993	0.00354246	KLK4	PREDICTED: enamel matrix serine proteinase 1 isoform X1 [Sus scrofa]	-	-	-	-	-	-	-
LOC100523610	351	396	419	617	551	506	29.96	28.66	30.57	40.1	37.84	38.12	29.73	38.6867	0.379917	0.000366907	0.00355817	UBE2J2	PREDICTED: ubiquitin-conjugating enzyme E2 J2 [Sus scrofa]	Genetic Information Processing;Human Diseases;Genetic Information Processing	Folding, sorting and degradation;Neurodegenerative diseases;Folding, sorting and degradation	ko04141//Protein processing in endoplasmic reticulum;ko05012//Parkinson disease;ko04120//Ubiquitin mediated proteolysis	K04554;K04554;K04554	-	-	-
LOC100623047	695	897	810	1163	1138	970	25.33	27.71	25.23	32.27	33.37	31.2	26.09	32.28	0.307144	0.0003726	0.00360758	CHPF	PREDICTED: LOW QUALITY PROTEIN: chondroitin sulfate synthase 2 [Sus scrofa]	Metabolism;Metabolism	Global and overview maps;Glycan biosynthesis and metabolism	ko01100//Metabolic pathways;ko00532//Glycosaminoglycan biosynthesis - chondroitin sulfate / dermatan sulfate	K00747;K00747	-	-	-
LOC106510284	159	207	207	319	326	256	9.27	10.57	11.03	14.88	15.85	13.83	10.29	14.8533	0.529544	0.000377196	0.0036433	APOL3	PREDICTED: apolipoprotein L3-like [Sus scrofa]	Human Diseases	Infectious diseases	ko05143//African trypanosomiasis	K14480	-	-	-
LOC100153027	369	410	461	415	348	352	4.13	3.91	4.43	3.55	3.15	3.48	4.15667	3.39333	-0.292724	0.000382186	0.00368561	SETBP1	PREDICTED: LOW QUALITY PROTEIN: SET-binding protein, partial [Sus scrofa]	-	-	-	-	-	-	-
LOC100510897	226	317	273	458	438	344	8.44	10.1	8.77	13.11	13.18	11.34	9.10333	12.5433	0.462454	0.000393659	0.0037905	Wdr24	PREDICTED: WD repeat-containing protein 24 isoform X1 [Sus scrofa]	Environmental Information Processing	Signal transduction	ko04150//mTOR signaling pathway	K20408	-	-	-
LOC100738659	493	535	551	824	743	649	6.04	5.57	5.79	7.72	7.36	7.06	5.8	7.38	0.347568	0.000393692	0.0037905	MCM3AP	PREDICTED: germinal-center associated nuclear protein isoform X1 [Sus scrofa]	-	-	-	-	-	-	-
LOC100626466	127	115	107	206	190	207	2.37	1.75	1.63	2.81	2.74	3.27	1.91667	2.94	0.617217	0.000397851	0.00382749	LARP4	PREDICTED: la-related protein 4 isoform X3 [Sus scrofa]	-	-	-	-	-	-	-
LOC100738679	109	91	115	188	194	168	12.29	8.7	11.08	16.14	17.6	16.72	10.69	16.82	0.653916	0.00040377	0.00388134	UTP23	PREDICTED: rRNA-processing protein UTP23 homolog [Sus scrofa]	-	-	-	-	-	-	-
LOC100144508	78	93	76	175	153	122	4.14	3.78	3.12	6.4	5.91	5.17	3.68	5.82667	0.662965	0.000409498	0.00393327	ID4	DNA-binding protein inhibitor ID-4 [Homo sapiens]	Cellular Processes;Environmental Information Processing	Cellular community - eukaryotes;Signal transduction	ko04550//Signaling pathways regulating pluripotency of stem cells;ko04350//TGF-beta signaling pathway	K17695;K17695	-	-	-
LOC102163961	70	91	76	58	54	40	1.53	1.76	1.43	0.99	0.99	0.8	1.57333	0.926667	-0.763702	0.00041016	0.00393649	Tnn	PREDICTED: tenascin-N isoform X2 [Ceratotherium simum simum]	Environmental Information Processing;Human Diseases;Cellular Processes;Human Diseases;Environmental Information Processing	Signal transduction;Infectious diseases;Cellular community - eukaryotes;Cancers;Signaling molecules and interaction	ko04151//PI3K-Akt signaling pathway;ko05165//Human papillomavirus infection;ko04510//Focal adhesion;ko05206//MicroRNAs in cancer;ko04512//ECM-receptor interaction	K06252;K06252;K06252;K06252;K06252	-	-	-
LOC100623705	536	656	660	938	830	777	11.6	12.07	12.24	15.48	14.49	14.89	11.97	14.9533	0.321044	0.000416965	0.00399862	PWP2	PREDICTED: periodic tryptophan protein 2 homolog [Vicugna pacos]	Genetic Information Processing	Translation	ko03008//Ribosome biogenesis in eukaryotes	K14558	-	-	-
LOC100523643	8	18	15	44	33	47	0.14	0.27	0.23	0.6	0.47	0.74	0.213333	0.603333	1.49985	0.000423344	0.00404692	DLGAP2	PREDICTED: disks large-associated protein 2 isoform X1 [Sus scrofa]	-	-	-	-	-	-	-
LOC100621398	29	32	30	10	9	17	0.82	0.76	0.72	0.21	0.2	0.42	0.766667	0.276667	-1.47045	0.00042948	0.00409909	MRAS	ras-related protein M-Ras [Bos taurus]	Environmental Information Processing;Human Diseases;Environmental Information Processing;Cellular Processes;Environmental Information Processing;Human Diseases;Cellular Processes;Environmental Information Processing;Environmental Information Processing;Cellular Processes;Organismal Systems;Cellular Processes	Signal transduction;Infectious diseases;Signal transduction;Cell motility;Signal transduction;Cancers;Cell growth and death;Signal transduction;Signal transduction;Transport and catabolism;Immune system;Transport and catabolism	ko04010//MAPK signaling pathway;ko05166//HTLV-I infection;ko04014//Ras signaling pathway;ko04810//Regulation of actin cytoskeleton;ko04015//Rap1 signaling pathway;ko05205//Proteoglycans in cancer;ko04218//Cellular senescence;ko04072//Phospholipase D signaling pathway;ko04371//Apelin signaling pathway;ko04140//Autophagy - animal;ko04625//C-type lectin receptor signaling pathway;ko04137//Mitophagy …	K07831;K07831;K07831;K07831;K07831;K07831;K07831;K07831;K07831;K07831;K07831;K07831	-	-	-
LOC102160785	26	28	24	63	74	51	0.71	0.65	0.56	1.31	1.63	1.23	0.64	1.39	1.11894	0.000438246	0.00417614	PRR36	PREDICTED: proline-rich protein 36 [Bos indicus]	-	-	-	-	-	-	-
LOC100155137	246	251	320	464	389	385	4.3	3.72	4.78	6.17	5.47	5.95	4.26667	5.86333	0.458612	0.000438988	0.00417991	POGZ	PREDICTED: pogo transposable element with ZNF domain isoform X1 [Sus scrofa]	-	-	-	-	-	-	-
LOC100620788	969	1299	1187	1622	1557	1407	72.83	82.76	76.25	92.8	94.15	93.32	77.28	93.4233	0.273688	0.000439955	0.00418568	CDC34	ubiquitin-conjugating enzyme E2 R1 [Bos taurus]	Human Diseases;Genetic Information Processing	Infectious diseases;Folding, sorting and degradation	ko05168//Herpes simplex infection;ko04120//Ubiquitin mediated proteolysis	K02207;K02207	-	-	-
LOC100622686	403	476	436	415	375	401	9.78	9.8	9.05	7.67	7.33	8.59	9.54333	7.86333	-0.279352	0.000443716	0.00421164	PHACTR4	PREDICTED: phosphatase and actin regulator 4 isoform X3 [Sus scrofa]	-	-	-	-	-	-	-
LOC100510894	146	173	162	126	144	100	2.32	2.16	2.04	1.51	1.74	1.3	2.17333	1.51667	-0.519005	0.000447059	0.00424003	JMY	PREDICTED: junction-mediating and -regulatory protein [Sus scrofa]	-	-	-	-	-	-	-
LOC733636	6	6	13	40	39	18	0.15	0.27	0.6	1.08	1.17	0.72	0.34	0.99	1.54189	0.000450079	0.00426417	HNF4A	PREDICTED: hepatocyte nuclear factor 4-alpha isoform X1 [Sus scrofa]	Environmental Information Processing;Human Diseases	Signal transduction;Endocrine and metabolic diseases	ko04152//AMPK signaling pathway;ko04950//Maturity onset diabetes of the young	K07292;K07292	-	-	-
LOC100158082	382	490	440	389	390	400	5.7	6.19	5.6	4.41	4.67	5.26	5.83	4.78	-0.286485	0.000453521	0.0042912	PPP3CC	PREDICTED: serine/threonine-protein phosphatase 2B catalytic subunit gamma isoform isoform X1 [Sus scrofa]	Environmental Information Processing;Human Diseases;Human Diseases;Human Diseases;Environmental Information Processing;Human Diseases;Human Diseases;Organismal Systems;Environmental Information Processing;Cellular Processes;Organismal Systems;Environmental Information Processing;Organismal Systems;Organismal Systems;Organismal Systems;Organismal Systems;Cellular Processes;Organismal Systems;Organ…	Signal transduction;Infectious diseases;Infectious diseases;Infectious diseases;Signal transduction;Infectious diseases;Neurodegenerative diseases;Development;Signal transduction;Cell growth and death;Endocrine system;Signal transduction;Development;Immune system;Nervous system;Immune system;Cell growth and death;Nervous system;Immune system;Immune system;Endocrine system;Immune system;Immune sys…	ko04010//MAPK signaling pathway;ko05166//HTLV-I infection;ko05163//Human cytomegalovirus infection;ko05167//Kaposi sarcoma-associated herpesvirus infection;ko04020//Calcium signaling pathway;ko05152//Tuberculosis;ko05010//Alzheimer disease;ko04360//Axon guidance;ko04022//cGMP - PKG signaling pathway;ko04218//Cellular senescence;ko04921//Oxytocin signaling pathway;ko04310//Wnt signaling pathway;ko…	K04348;K04348;K04348;K04348;K04348;K04348;K04348;K04348;K04348;K04348;K04348;K04348;K04348;K04348;K04348;K04348;K04348;K04348;K04348;K04348;K04348;K04348;K04348;K04348;K04348;K04348;K04348;K04348	-	-	-
LOC110256368	99	111	138	207	199	180	1.52	1.45	1.82	2.43	2.47	2.45	1.59667	2.45	0.617719	0.000457256	0.00432315	URB1	PREDICTED: nucleolar pre-ribosomal-associated protein 1 isoform X2 [Physeter catodon]	-	-	-	-	-	-	-
LOC100519519	5	4	10	33	23	24	0.01	0	0.01	0.03	0.02	0.02	0.00666667	0.0233333	1.80735	0.00046144	0.00435929	TTN	PREDICTED: titin isoform X49 [Camelus ferus]	Human Diseases;Human Diseases	Cardiovascular diseases;Cardiovascular diseases	ko05414//Dilated cardiomyopathy (DCM);ko05410//Hypertrophic cardiomyopathy (HCM)	K12567;K12567	-	-	-
LOC100142663	69	111	89	45	77	44	6.64	9.23	7.47	3.27	5.93	3.68	7.78	4.29333	-0.857672	0.00046911	0.00442828	PON2	PREDICTED: serum paraoxonase/arylesterase 2 isoform X2 [Sus scrofa]	-	-	-	-	-	-	-
LOC100155050	335	416	407	370	362	311	38.3	40.41	39.88	32.26	33.34	31.47	39.53	32.3567	-0.288885	0.000471772	0.00444993	MGMT	PREDICTED: methylated-DNA--protein-cysteine methyltransferase isoform X2 [Sus scrofa]	-	-	-	-	-	-	-
LOC100152445	157	171	149	127	127	117	10.91	10.08	8.84	6.71	7.1	7.16	9.94333	6.99	-0.508437	0.000486615	0.0045685	SMIM19	small integral membrane protein 19 [Sus scrofa]	-	-	-	-	-	-	-
LOC100522869	351	405	420	365	342	352	17.93	17.81	18.63	14.32	14.18	15.87	18.1233	14.79	-0.293226	0.000488708	0.00458102	PLEKHF1	PREDICTED: pleckstrin homology domain-containing family F member 1 [Sus scrofa]	-	-	-	-	-	-	-
LOC100154763	293	349	310	294	283	259	7.7	7.85	6.96	5.88	6	6	7.50333	5.96	-0.332219	0.000494467	0.00463141	TAOK3	PREDICTED: serine/threonine-protein kinase TAO3 [Sus scrofa]	Environmental Information Processing	Signal transduction	ko04010//MAPK signaling pathway	K04429	-	-	-
LOC100627029	61	97	73	64	33	43	1.82	2.51	1.93	1.46	0.77	1.17	2.08667	1.13333	-0.880628	0.000498359	0.00466424	TRAF1	PREDICTED: TNF receptor-associated factor 1 isoform X1 [Balaenoptera acutorostrata scammoni]	Human Diseases;Human Diseases;Human Diseases;Human Diseases;Human Diseases;Cellular Processes;Environmental Information Processing;Environmental Information Processing;Human Diseases	Cancers;Infectious diseases;Infectious diseases;Cancers;Cancers;Cell growth and death;Signal transduction;Signal transduction;Cancers	ko05200//Pathways in cancer;ko05168//Herpes simplex infection;ko05169//Epstein-Barr virus infection;ko05203//Viral carcinogenesis;ko05202//Transcriptional misregulation in cancers;ko04210//Apoptosis;ko04668//TNF signaling pathway;ko04064//NF-kappa B signaling pathway;ko05222//Small cell lung cancer	K03172;K03172;K03172;K03172;K03172;K03172;K03172;K03172;K03172	-	-	-
LOC100519781	897	1069	1043	1504	1382	1152	54.74	55.31	54.33	69.86	67.74	61.94	54.7933	66.5133	0.279643	0.000499492	0.00467122	TMEM125	PREDICTED: transmembrane protein 125 [Sus scrofa]	-	-	-	-	-	-	-
LOC100153815	195	228	194	320	319	317	11.5	11.62	9.54	14.81	15.7	17.11	10.8867	15.8733	0.544043	0.000502296	0.00469381	ZNHIT6	box C/D snoRNA protein 1 [Sus scrofa]	-	-	-	-	-	-	-
LOC100511508	187	242	231	357	337	308	4.52	4.96	4.77	6.57	6.55	6.57	4.75	6.56333	0.466501	0.000504064	0.00470536	LEMD3	LEM domain containing 3 [Sus scrofa]	-	-	-	-	-	-	-
LOC100524407	395	499	494	395	451	405	33.25	35.61	35.55	25.32	30.55	30.09	34.8033	28.6533	-0.280523	0.000508258	0.00473851	Dtd1	PREDICTED: D-tyrosyl-tRNA(Tyr) deacylase 1 [Sus scrofa]	-	-	-	-	-	-	-
LOC100738793	192	251	272	347	391	355	3.58	3.58	4.15	4.61	5.25	5.13	3.77	4.99667	0.406401	0.000508792	0.00473982	PARD3B	PREDICTED: partitioning defective 3 homolog B isoform X1 [Bos taurus]	-	-	-	-	-	-	-
LOC100623969	532	621	597	817	873	740	24.25	24.04	23.37	28.36	32.09	29.74	23.8867	30.0633	0.331799	0.000513651	0.00476668	TBL3	PREDICTED: transducin beta-like protein 3 isoform X1 [Hipposideros armiger]	Genetic Information Processing	Translation	ko03008//Ribosome biogenesis in eukaryotes	K14555	-	-	-
LOC110262190	65	59	36	26	22	34	1.48	1.26	0.67	0.44	0.44	0.67	1.13667	0.516667	-1.1375	0.000514311	0.00476914	PPM1K	PREDICTED: protein phosphatase 1K, mitochondrial isoform X1 [Capra hircus]	-	-	-	-	-	-	-
LOC100626376	113	123	125	79	79	100	2.59	2.39	2.45	1.38	1.46	2.03	2.47667	1.62333	-0.60944	0.000527859	0.00487977	USP53	PREDICTED: inactive ubiquitin carboxyl-terminal hydrolase 53 [Sus scrofa]	-	-	-	-	-	-	-
LOC100628234	171	256	230	361	339	307	11.81	14.96	13.54	18.94	18.91	18.74	13.4367	18.8633	0.489409	0.000534594	0.00493824	CPTP	PREDICTED: ceramide-1-phosphate transfer protein [Sus scrofa]	-	-	-	-	-	-	-
LOC100520873	300	311	314	273	289	245	14.1	12.73	12.85	10.13	11.22	10.27	13.2267	10.54	-0.327575	0.000536562	0.00495263	IMPDH1	PREDICTED: inosine-5'-monophosphate dehydrogenase 1 isoform X1 [Lipotes vexillifer]	Metabolism;Metabolism;Metabolism	Global and overview maps;Nucleotide metabolism;Xenobiotics biodegradation and metabolism	ko01100//Metabolic pathways;ko00230//Purine metabolism;ko00983//Drug metabolism - other enzymes	K00088;K00088;K00088	-	-	-
MSTRG.23008	13	21	13	4	5	1	1.97	2.7	1.68	0.46	0.61	0.13	2.11667	0.4	-2.40372	0.00053702	0.00495307	--	PREDICTED: mitochondrial inner membrane protein COX18 isoform X1 [Sus scrofa]	-	-	-	-	-	-	-
LOC606745	74	100	100	175	176	131	4.85	5.53	5.58	8.69	9.23	7.53	5.32	8.48333	0.673205	0.000538221	0.00496035	ADORA2B	PREDICTED: adenosine receptor A2b [Sus scrofa]	Environmental Information Processing;Environmental Information Processing;Environmental Information Processing;Human Diseases;Organismal Systems	Signaling molecules and interaction;Signal transduction;Signal transduction;Substance dependence;Circulatory system	ko04080//Neuroactive ligand-receptor interaction;ko04015//Rap1 signaling pathway;ko04020//Calcium signaling pathway;ko05034//Alcoholism;ko04270//Vascular smooth muscle contraction	K04267;K04267;K04267;K04267;K04267	-	-	-
LOC100512951	87	70	64	168	134	119	2.5	1.72	1.58	3.69	3.11	3.04	1.93333	3.28	0.762605	0.000540077	0.00497231	Tcf7	PREDICTED: transcription factor 7 isoform X1 [Rousettus aegyptiacus]	Human Diseases;Human Diseases;Human Diseases;Human Diseases;Environmental Information Processing;Human Diseases;Human Diseases;Environmental Information Processing;Human Diseases;Organismal Systems;Human Diseases;Human Diseases;Cellular Processes;Human Diseases;Human Diseases;Human Diseases;Human Diseases	Cancers;Infectious diseases;Cancers;Endocrine and metabolic diseases;Signal transduction;Cancers;Cancers;Signal transduction;Cancers;Endocrine system;Cancers;Cardiovascular diseases;Cellular community - eukaryotes;Cancers;Cancers;Cancers;Cancers	ko05200//Pathways in cancer;ko05165//Human papillomavirus infection;ko05225//Hepatocellular carcinoma;ko04934//Cushing syndrome;ko04390//Hippo signaling pathway;ko05226//Gastric cancer;ko05224//Breast cancer;ko04310//Wnt signaling pathway;ko05215//Prostate cancer;ko04916//Melanogenesis;ko05210//Colorectal cancer;ko05412//Arrhythmogenic right ventricular cardiomyopathy (ARVC);ko04520//Adherens jun…	K02620;K02620;K02620;K02620;K02620;K02620;K02620;K02620;K02620;K02620;K02620;K02620;K02620;K02620;K02620;K02620;K02620	-	-	-
LOC431781	15	14	26	48	49	50	2.21	1.75	3.27	5.38	5.8	6.49	2.41	5.89	1.28923	0.000540404	0.00497231	CLDN3	claudin-3 [Sus scrofa]	Cellular Processes;Environmental Information Processing;Human Diseases;Organismal Systems;Human Diseases	Cellular community - eukaryotes;Signaling molecules and interaction;Infectious diseases;Immune system;Infectious diseases	ko04530//Tight junction;ko04514//Cell adhesion molecules (CAMs);ko05160//Hepatitis C;ko04670//Leukocyte transendothelial migration;ko05130//Pathogenic Escherichia coli infection	K06087;K06087;K06087;K06087;K06087	-	-	-
LOC100625522	121	160	158	263	228	215	2.88	3.23	3.22	4.77	4.37	4.51	3.11	4.55	0.548952	0.000541112	0.00497231	TGFBRAP1	PREDICTED: transforming growth factor-beta receptor-associated protein 1 isoform X1 [Sus scrofa]	-	-	-	-	-	-	-
LOC100627721	300	367	354	314	320	273	51.6	53.51	52.04	41.11	44.28	41.44	52.3833	42.2767	-0.309246	0.000541168	0.00497231	FAM96B	PREDICTED: mitotic spindle-associated MMXD complex subunit MIP18 [Otolemur garnettii]	-	-	-	-	-	-	-
LOC100738413	312	385	412	335	306	338	16.98	17.38	19.4	13.62	12.84	14.03	17.92	13.4967	-0.408967	0.000547125	0.0050194	TAF1D	PREDICTED: LOW QUALITY PROTEIN: TATA box-binding protein-associated factor RNA polymerase I subunit D [Tursiops truncatus]	-	-	-	-	-	-	-
LOC110261154	234	259	194	187	203	165	33.26	31.21	23.57	20.23	23.22	20.7	29.3467	21.3833	-0.45671	0.000548645	0.0050257	--	PREDICTED: uncharacterized protein C1orf122 homolog [Bos taurus]	-	-	-	-	-	-	-
LOC100624950	62	83	102	165	139	139	0.78	0.9	1.11	1.6	1.42	1.56	0.93	1.52667	0.715082	0.000551781	0.0050506	Cyb561d1	PREDICTED: cytochrome b561 domain-containing protein 1 [Sus scrofa]	-	-	-	-	-	-	-
LOC497233	344	348	400	315	323	325	15.77	13.75	14.93	10.09	11.86	12.29	14.8167	11.4133	-0.376501	0.000555635	0.00507817	CFL2	cofilin-2 isoform 1 [Homo sapiens]	Cellular Processes;Organismal Systems;Organismal Systems;Human Diseases	Cell motility;Development;Immune system;Infectious diseases	ko04810//Regulation of actin cytoskeleton;ko04360//Axon guidance;ko04666//Fc gamma R-mediated phagocytosis;ko05133//Pertussis	K05765;K05765;K05765;K05765	-	-	-
LOC110258073	121	131	105	230	209	169	3.1	2.81	2.3	4.5	4.3	3.78	2.73667	4.19333	0.615678	0.000556238	0.00507983	SNAPC4	PREDICTED: snRNA-activating protein complex subunit 4 [Ceratotherium simum simum]	-	-	-	-	-	-	-
MSTRG.21224	35	23	35	19	11	8	4.17	2.33	3.57	1.72	1.06	0.84	3.35667	1.20667	-1.476	0.000560063	0.00511089	--	-	-	-	-	-	-	-	-
LOC100524751	504	513	532	747	740	684	12.58	11.6	11.83	14.66	15.65	15.64	12.0033	15.3167	0.351667	0.00056648	0.00516555	RIPK1	PREDICTED: receptor-interacting serine/threonine-protein kinase 1 isoform X1 [Sus scrofa]	Human Diseases;Human Diseases;Cellular Processes;Organismal Systems;Human Diseases;Cellular Processes;Organismal Systems;Environmental Information Processing;Environmental Information Processing;Organismal Systems;Organismal Systems	Infectious diseases;Infectious diseases;Cell growth and death;Immune system;Infectious diseases;Cell growth and death;Immune system;Signal transduction;Signal transduction;Immune system;Immune system	ko05163//Human cytomegalovirus infection;ko05169//Epstein-Barr virus infection;ko04217//Necroptosis;ko04621//NOD-like receptor signaling pathway;ko05160//Hepatitis C;ko04210//Apoptosis;ko04620//Toll-like receptor signaling pathway;ko04668//TNF signaling pathway;ko04064//NF-kappa B signaling pathway;ko04622//RIG-I-like receptor signaling pathway;ko04623//Cytosolic DNA-sensing pathway	K02861;K02861;K02861;K02861;K02861;K02861;K02861;K02861;K02861;K02861;K02861	-	-	-
LOC100523889	477	544	539	759	723	679	23.35	22.58	22.58	28.26	28.5	29.41	22.8367	28.7233	0.330871	0.00056731	0.00516921	MBD3	PREDICTED: methyl-CpG-binding domain protein 3 isoform X1 [Sus scrofa]	-	-	-	-	-	-	-
MSTRG.15027	162	194	186	156	155	126	10.13	10.29	9.94	7.43	7.8	6.95	10.12	7.39333	-0.452912	0.000567877	0.00517047	--	PREDICTED: mitochondrial inner membrane protein COX18 isoform X1 [Sus scrofa]	-	-	-	-	-	-	-
LOC100626247	256	260	278	443	383	361	40.12	34.55	37.31	52.95	48.39	49.97	37.3267	50.4367	0.434266	0.000575805	0.0052387	IFITM1	PREDICTED: interferon-induced transmembrane protein 1-like [Sus scrofa]	-	-	-	-	-	-	-
LOC100524266	394	523	458	447	398	409	16.41	18.37	16.06	13.98	13.24	15.02	16.9467	14.08	-0.267354	0.000579195	0.0052616	GPAT3	PREDICTED: glycerol-3-phosphate acyltransferase 3 [Sus scrofa]	Metabolism;Metabolism;Metabolism	Global and overview maps;Lipid metabolism;Lipid metabolism	ko01100//Metabolic pathways;ko00564//Glycerophospholipid metabolism;ko00561//Glycerolipid metabolism	K13506;K13506;K13506	-	-	-
LOC100512152	596	694	736	964	979	826	33.65	33.22	35.52	41.44	44.48	41.16	34.13	42.36	0.311662	0.000579678	0.00526203	Deaf1	PREDICTED: LOW QUALITY PROTEIN: deformed epidermal autoregulatory factor 1 homolog [Sus scrofa]	-	-	-	-	-	-	-
LOC100169931	333	387	396	388	329	284	27.48	27.07	27.93	24.37	21.84	20.68	27.4933	22.2967	-0.302254	0.000580422	0.00526482	SLC30A3	zinc transporter 3 [Sus scrofa]	-	-	-	-	-	-	-
LOC100512023	171	207	204	176	159	142	3.72	3.82	3.79	2.91	2.78	2.72	3.77667	2.80333	-0.42997	0.000581229	0.00526818	HECA	PREDICTED: headcase protein homolog [Capra hircus]	-	-	-	-	-	-	-
LOC100156489	115	121	125	204	213	182	4.66	4.16	4.33	6.3	6.95	6.51	4.38333	6.58667	0.58752	0.000584872	0.00529722	TGM1	PREDICTED: protein-glutamine gamma-glutamyltransferase K [Sus scrofa]	-	-	-	-	-	-	-
LOC100520319	249	311	264	241	226	237	6.65	7.04	6.03	4.9	4.86	5.59	6.57333	5.11667	-0.361421	0.000587223	0.00530559	FZD4	PREDICTED: frizzled-4 isoform X1 [Sus scrofa]	Human Diseases;Human Diseases;Human Diseases;Human Diseases;Human Diseases;Human Diseases;Environmental Information Processing;Environmental Information Processing;Human Diseases;Human Diseases;Cellular Processes;Environmental Information Processing;Organismal Systems;Human Diseases	Cancers;Infectious diseases;Infectious diseases;Cancers;Cancers;Endocrine and metabolic diseases;Signal transduction;Signal transduction;Cancers;Cancers;Cellular community - eukaryotes;Signal transduction;Endocrine system;Cancers	ko05200//Pathways in cancer;ko05165//Human papillomavirus infection;ko05166//HTLV-I infection;ko05205//Proteoglycans in cancer;ko05225//Hepatocellular carcinoma;ko04934//Cushing syndrome;ko04390//Hippo signaling pathway;ko04150//mTOR signaling pathway;ko05226//Gastric cancer;ko05224//Breast cancer;ko04550//Signaling pathways regulating pluripotency of stem cells;ko04310//Wnt signaling pathway;ko0…	K02354;K02354;K02354;K02354;K02354;K02354;K02354;K02354;K02354;K02354;K02354;K02354;K02354;K02354	-	-	-
LOC397413	310	340	356	526	543	411	49.58	46.13	48.66	64.07	69.87	58.04	48.1233	63.9933	0.411185	0.000587332	0.00530559	FXYD3	PREDICTED: FXYD domain-containing ion transport regulator 3 isoform X1 [Sus scrofa]	-	-	-	-	-	-	-
LOC100626947	443	545	563	737	753	667	13.33	13.9	14.48	16.88	18.23	17.71	13.9033	17.6067	0.340691	0.000587692	0.00530559	WNT7B	PREDICTED: protein Wnt-7b isoform X1 [Chlorocebus sabaeus]	Human Diseases;Human Diseases;Human Diseases;Human Diseases;Human Diseases;Human Diseases;Environmental Information Processing;Environmental Information Processing;Human Diseases;Human Diseases;Cellular Processes;Environmental Information Processing;Organismal Systems;Human Diseases	Cancers;Infectious diseases;Infectious diseases;Cancers;Cancers;Endocrine and metabolic diseases;Signal transduction;Signal transduction;Cancers;Cancers;Cellular community - eukaryotes;Signal transduction;Endocrine system;Cancers	ko05200//Pathways in cancer;ko05165//Human papillomavirus infection;ko05166//HTLV-I infection;ko05205//Proteoglycans in cancer;ko05225//Hepatocellular carcinoma;ko04934//Cushing syndrome;ko04390//Hippo signaling pathway;ko04150//mTOR signaling pathway;ko05226//Gastric cancer;ko05224//Breast cancer;ko04550//Signaling pathways regulating pluripotency of stem cells;ko04310//Wnt signaling pathway;ko0…	K00572;K00572;K00572;K00572;K00572;K00572;K00572;K00572;K00572;K00572;K00572;K00572;K00572;K00572	-	-	-
LOC100739264	192	236	216	335	331	313	4.62	4.82	4.45	6.14	6.41	6.65	4.63	6.4	0.46706	0.000587995	0.00530559	HES4	PREDICTED: transcription factor HES-4 [Sus scrofa]	Human Diseases	Infectious diseases	ko05165//Human papillomavirus infection	K09089	-	-	-
LOC100626101	311	335	359	539	480	438	4.4	4.07	4.5	5.72	5.35	5.39	4.32333	5.48667	0.343786	0.000591556	0.00533373	MKL2	PREDICTED: MKL/myocardin-like protein 2 isoform X2 [Ovis aries musimon]	-	-	-	-	-	-	-
LOC100156435	13	16	21	41	52	43	3.04	3.17	4.2	7.3	9.79	8.88	3.47	8.65667	1.31888	0.00060043	0.0053976	TNNC1	troponin C, slow skeletal and cardiac muscles [Bos taurus]	Environmental Information Processing;Organismal Systems;Human Diseases;Human Diseases;Organismal Systems	Signal transduction;Circulatory system;Cardiovascular diseases;Cardiovascular diseases;Circulatory system	ko04020//Calcium signaling pathway;ko04261//Adrenergic signaling in cardiomyocytes;ko05414//Dilated cardiomyopathy (DCM);ko05410//Hypertrophic cardiomyopathy (HCM);ko04260//Cardiac muscle contraction	K05865;K05865;K05865;K05865;K05865	-	-	-
LOC100526252	187	241	212	180	171	177	9.7	10.64	9.5	7.13	7.16	8.07	9.94667	7.45333	-0.416327	0.000608181	0.00546322	TTI2	PREDICTED: TELO2-interacting protein 2 [Sus scrofa]	-	-	-	-	-	-	-
LOC100624820	295	303	319	461	450	433	20.22	17.52	18.79	24.53	25.24	26.32	18.8433	25.3633	0.42869	0.000610793	0.00548259	JDP2	PREDICTED: jun dimerization protein 2 [Trichechus manatus latirostris]	-	-	-	-	-	-	-
LOC100156038	478	573	572	792	731	714	28.24	30.27	29.16	37.68	34.85	37.62	29.2233	36.7167	0.329314	0.000613387	0.00550178	WDR77	PREDICTED: methylosome protein 50 [Sus scrofa]	-	-	-	-	-	-	-
LOC110260410	112	201	154	281	274	216	2.79	4.25	3.28	5.33	5.49	4.75	3.44	5.19	0.593326	0.000616237	0.00552175	TIGD5	PREDICTED: tigger transposable element-derived protein 5 [Bos taurus]	-	-	-	-	-	-	-
LOC100154558	94	125	120	90	83	74	1.56	1.76	1.71	1.14	1.11	1.09	1.67667	1.11333	-0.59071	0.000616529	0.00552175	ZNF697	PREDICTED: zinc finger protein 697 isoform X1 [Sus scrofa]	-	-	-	-	-	-	-
LOC100621858	206	262	258	380	364	340	20.71	22.33	22.17	29.09	29.45	30.17	21.7367	29.57	0.444004	0.00062152	0.00556233	C21orf2	PREDICTED: protein C21orf2 [Sus scrofa]	-	-	-	-	-	-	-
LOC100624986	438	507	514	681	687	671	8.06	7.9	8.08	9.53	10.19	10.89	8.01333	10.2033	0.348566	0.000640783	0.00571775	AVIL	PREDICTED: advillin isoform X1 [Sus scrofa]	-	-	-	-	-	-	-
MSTRG.20118	27	39	56	81	93	84	0.8	0.97	1.42	1.81	2.21	2.18	1.06333	2.06667	0.958712	0.000641862	0.00572315	--	PREDICTED: mitochondrial inner membrane protein COX18 isoform X1 [Sus scrofa]	-	-	-	-	-	-	-
LOC100515774	393	536	561	462	477	418	35.28	40.79	43.05	31.58	34.46	33.12	39.7067	33.0533	-0.264585	0.000642425	0.00572394	GFER	PREDICTED: FAD-linked sulfhydryl oxidase ALR [Sus scrofa]	-	-	-	-	-	-	-
LOC100524577	618	659	673	925	935	813	28.51	25.77	26.54	32.49	34.71	33.1	26.94	33.4333	0.311537	0.000654545	0.00582333	RNPEP	PREDICTED: aminopeptidase B [Chlorocebus sabaeus]	-	-	-	-	-	-	-
LOC100737907	839	959	958	1269	1269	1129	13.08	12.68	12.77	15.06	15.92	15.54	12.8433	15.5067	0.271869	0.000656471	0.00583186	FAM20C	PREDICTED: extracellular serine/threonine protein kinase FAM20C [Canis lupus familiaris]	-	-	-	-	-	-	-
LOC100157797	271	337	344	282	278	277	3.07	3.24	3.34	2.44	2.54	2.77	3.21667	2.58333	-0.316333	0.000663414	0.00588055	TMEM65	PREDICTED: transmembrane protein 65 isoform X2 [Ovis aries musimon]	-	-	-	-	-	-	-
LOC100622445	135	148	151	125	119	92	3.84	3.56	3.67	2.7	2.72	2.31	3.69	2.57667	-0.518115	0.000668237	0.00591895	Elk3	PREDICTED: ETS domain-containing protein Elk-3 [Sus scrofa]	-	-	-	-	-	-	-
LOC100156590	20	37	23	52	74	65	0.43	0.68	0.42	0.85	1.28	1.24	0.51	1.12333	1.13922	0.000672185	0.00594956	LCMT2	PREDICTED: tRNA wybutosine-synthesizing protein 4 [Sus scrofa]	-	-	-	-	-	-	-
LOC100515802	60	100	87	145	156	139	1.86	2.63	2.31	3.43	3.89	3.81	2.26667	3.71	0.710847	0.000673206	0.00595422	Lrfn1	PREDICTED: leucine-rich repeat and fibronectin type III domain-containing protein 1 [Sus scrofa]	-	-	-	-	-	-	-
MSTRG.10321	21	19	25	54	66	43	0.96	0.72	0.98	1.85	2.39	1.71	0.886667	1.98333	1.16146	0.000682218	0.00602068	--	PREDICTED: mitochondrial inner membrane protein COX18 isoform X1 [Sus scrofa]	-	-	-	-	-	-	-
LOC110260947	123	149	161	238	226	229	2.28	2.35	2.52	3.34	3.39	3.74	2.38333	3.49	0.550246	0.000684011	0.00602352	Slc7a6	PREDICTED: Y+L amino acid transporter 2 isoform X2 [Lipotes vexillifer]	-	-	-	-	-	-	-
LOC100523850	209	221	220	357	304	332	4.6	4.71	4.14	5.97	5.74	6.61	4.48333	6.10667	0.445813	0.000690301	0.00606982	PPCS	PREDICTED: phosphopantothenate--cysteine ligase isoform X1 [Sus scrofa]	Metabolism;Metabolism	Global and overview maps;Metabolism of cofactors and vitamins	ko01100//Metabolic pathways;ko00770//Pantothenate and CoA biosynthesis	K01922;K01922	-	-	-
LOC100620398	51	55	70	129	101	105	1.84	1.74	1.76	3.34	2.26	2.71	1.78	2.77	0.638009	0.000693095	0.00608994	Sema3a	PREDICTED: semaphorin-3A isoform X1 [Bos taurus]	Organismal Systems	Development	ko04360//Axon guidance	K06840	-	-	-
LOC100621764	14	16	15	0	4	5	0.92	0.89	0.85	0	0.21	0.29	0.886667	0.166667	-2.41143	0.000697049	0.00611578	DEPDC7	PREDICTED: DEP domain-containing protein 7 [Sus scrofa]	-	-	-	-	-	-	-
LOC100513621	291	337	322	487	431	467	4.7	4.91	4.73	6.58	5.61	6.99	4.78	6.39333	0.419558	0.000700006	0.00613726	MED1	PREDICTED: mediator of RNA polymerase II transcription subunit 1 isoform X1 [Sus scrofa]	Organismal Systems;Human Diseases	Endocrine system;Drug resistance	ko04919//Thyroid hormone signaling pathway;ko01522//Endocrine resistance	K15144;K15144	-	-	-
LOC100626641	269	327	263	259	235	244	6.28	6.72	5.22	4.64	4.42	5.24	6.07333	4.76667	-0.349508	0.000703501	0.00615947	SLC41A1	solute carrier family 41 member 1 [Sus scrofa]	-	-	-	-	-	-	-
LOC100154205	46	71	59	39	32	33	3.09	3.59	4.01	1.61	1.14	2.11	3.56333	1.62	-1.13723	0.000703586	0.00615947	DUSP13	PREDICTED: dual specificity protein phosphatase 13 isoform X1 [Sus scrofa]	-	-	-	-	-	-	-
LOC100625819	469	515	557	522	438	472	20.34	18.55	22.28	16.71	15.9	16.38	20.39	16.33	-0.320337	0.000704071	0.00615947	GMFB	PREDICTED: glia maturation factor beta isoform X1 [Mustela putorius furo]	-	-	-	-	-	-	-
LOC100737805	744	832	864	1220	1013	1065	19.46	18.45	19.32	24.29	21.32	24.58	19.0767	23.3967	0.294494	0.000708394	0.00619235	Sun1	PREDICTED: SUN domain-containing protein 1-like isoform X4 [Sus scrofa]	-	-	-	-	-	-	-
LOC100624832	331	401	366	610	534	447	9.71	9.88	9.13	13.37	12.33	11.42	9.57333	12.3733	0.370141	0.000708855	0.00619235	PIGO	PREDICTED: GPI ethanolamine phosphate transferase 3 isoform X1 [Sus scrofa]	Metabolism;Metabolism	Global and overview maps;Glycan biosynthesis and metabolism	ko01100//Metabolic pathways;ko00563//Glycosylphosphatidylinositol(GPI)-anchor biosynthesis	K05288;K05288	-	-	-
MSTRG.356	196	234	258	235	159	172	7.33	7.42	8.25	6.69	4.79	5.68	7.66667	5.72	-0.422584	0.000711027	0.00620683	--	-	-	-	-	-	-	-	-
LOC100514649	388	503	501	644	692	624	17.27	18.94	19.1	21.89	24.79	24.55	18.4367	23.7433	0.364945	0.000725699	0.00632575	KATNB1	PREDICTED: katanin p80 WD40 repeat-containing subunit B1 [Ceratotherium simum simum]	-	-	-	-	GO:0005815//microtubule organizing center;GO:0005875//microtubule associated complex;GO:0043005//neuron projection;GO:0043231//intracellular membrane-bounded organelle	GO:0015631//tubulin binding;GO:0042623//ATPase activity, coupled;GO:0046983//protein dimerization activity	GO:0000280//nuclear division;GO:0031111//negative regulation of microtubule polymerization or depolymerization;GO:0031112//positive regulation of microtubule polymerization or depolymerization;GO:0051305//chromosome movement towards spindle pole
LOC100514295	332	427	426	409	340	324	25.36	27.65	27.81	23.79	20.9	21.84	26.94	22.1767	-0.280707	0.000727501	0.00633688	RPA2	replication protein A 32 kDa subunit [Sus scrofa]	Genetic Information Processing;Genetic Information Processing;Genetic Information Processing;Genetic Information Processing;Genetic Information Processing	Replication and repair;Replication and repair;Replication and repair;Replication and repair;Replication and repair	ko03460//Fanconi anemia pathway;ko03420//Nucleotide excision repair;ko03440//Homologous recombination;ko03030//DNA replication;ko03430//Mismatch repair	K10739;K10739;K10739;K10739;K10739	GO:0016604//nuclear body;GO:0043234//protein complex;GO:0098687//chromosomal region	GO:0003677//DNA binding;GO:0019902//phosphatase binding;GO:0044389//ubiquitin-like protein ligase binding	GO:0000018//regulation of DNA recombination;GO:0000725//recombinational repair;GO:0044773//mitotic DNA damage checkpoint
LOC100515060	353	468	457	412	367	383	4.21	4.74	4.67	3.75	3.53	4.04	4.54	3.77333	-0.266853	0.00073161	0.00636377	RAPH1	PREDICTED: LOW QUALITY PROTEIN: ras-associated and pleckstrin homology domains-containing protein 1 [Felis catus]	-	-	-	-	GO:0016020//membrane;GO:0031252//cell leading edge;GO:0042995//cell projection;GO:0043232//intracellular non-membrane-bounded organelle	GO:0005488//binding	GO:0031589//cell-substrate adhesion;GO:1990138//neuron projection extension
LOC100738275	17	14	17	6	3	3	0.26	0.18	0.22	0.07	0.04	0.04	0.22	0.05	-2.1375	0.000731643	0.00636377	REPS2	PREDICTED: ralBP1-associated Eps domain-containing protein 2 isoform X1 [Tursiops truncatus]	-	-	-	-	-	-	-
LOC100626582	124	117	125	223	186	199	3.62	3.05	3.14	5.27	4.43	4.74	3.27	4.81333	0.557746	0.000733081	0.00637168	ARHGEF26	PREDICTED: rho guanine nucleotide exchange factor 26 [Camelus bactrianus]	Human Diseases	Infectious diseases	ko05100//Bacterial invasion of epithelial cells	K13744	-	-	-
LOC100517799	111	127	148	214	209	206	3.53	3.6	4.35	5.09	5.65	6.12	3.82667	5.62	0.554482	0.000736681	0.00639376	LONRF3	PREDICTED: LON peptidase N-terminal domain and RING finger protein 3 isoform X1 [Sus scrofa]	-	-	-	-	-	-	-
LOC100144537	505	633	593	826	805	741	31.9	33.94	32.07	39.98	41.29	41.85	32.6367	41.04	0.330537	0.000741545	0.00643134	PPT2	lysosomal thioesterase PPT2 precursor [Sus scrofa]	Metabolism;Cellular Processes;Metabolism;Metabolism	Global and overview maps;Transport and catabolism;Global and overview maps;Lipid metabolism	ko01100//Metabolic pathways;ko04142//Lysosome;ko01212//Fatty acid metabolism;ko00062//Fatty acid elongation	K01074;K01074;K01074;K01074	-	-	-
LOC100622847	126	134	178	256	246	208	6.05	5.49	7.49	9.6	9.6	8.88	6.34333	9.36	0.561267	0.000749889	0.00648507	CD3EAP	PREDICTED: DNA-directed RNA polymerase I subunit RPA34 [Sus scrofa]	-	-	-	-	-	-	-
LOC100153104	193	177	218	147	161	163	8.44	6.51	8.14	4.76	5.95	6.35	7.69667	5.68667	-0.436651	0.000751564	0.00649071	POLH	PREDICTED: DNA polymerase eta isoform X2 [Sus scrofa]	Human Diseases;Genetic Information Processing	Drug resistance;Replication and repair	ko01524//Platinum drug resistance;ko03460//Fanconi anemia pathway	K03509;K03509	-	-	-
LOC106509958	130	148	180	129	117	111	3.61	3.53	4.54	2.68	2.71	2.81	3.89333	2.73333	-0.510344	0.000751619	0.00649071	MTSS1	PREDICTED: metastasis suppressor protein 1 isoform X1 [Balaenoptera acutorostrata scammoni]	-	-	-	-	-	-	-
LOC100524150	49	69	87	44	42	40	1.59	1.9	2.42	1.09	1.1	1.15	1.97	1.11333	-0.82331	0.000757761	0.00653907	MAN1C1	PREDICTED: mannosyl-oligosaccharide 1,2-alpha-mannosidase IC [Sus scrofa]	Metabolism;Genetic Information Processing;Metabolism	Global and overview maps;Folding, sorting and degradation;Glycan biosynthesis and metabolism	ko01100//Metabolic pathways;ko04141//Protein processing in endoplasmic reticulum;ko00510//N-Glycan biosynthesis	K01230;K01230;K01230	-	-	-
LOC100155921	625	689	700	973	981	803	27.89	26.07	26.7	33.06	35.23	31.63	26.8867	33.3067	0.30892	0.000758633	0.00654192	Wrnip1	PREDICTED: ATPase WRNIP1 isoform X1 [Orcinus orca]	-	-	-	-	-	-	-
LOC100628007	365	379	389	609	519	497	12.04	10.63	10.93	15.23	13.72	14.5	11.2	14.4833	0.370895	0.000767768	0.00660653	Arhgap27	PREDICTED: rho GTPase-activating protein 27 isoform X1 [Sus scrofa]	-	-	-	-	-	-	-
LOC100156384	271	301	291	421	453	396	9.72	9.28	8.99	11.56	13.2	12.63	9.33	12.4633	0.417741	0.000772692	0.00664416	NCOA5	PREDICTED: nuclear receptor coactivator 5 [Sus scrofa]	-	-	-	-	-	-	-
LOC100526225	57	67	80	47	41	41	1.02	1.02	1.23	0.64	0.59	0.65	1.09	0.626667	-0.798558	0.000777529	0.00667624	ANKRD65	PREDICTED: ankyrin repeat domain-containing protein 65 [Sus scrofa]	-	-	-	-	-	-	-
LOC407739	136	163	178	274	234	244	16.47	16.73	18.43	25.26	22.8	26.08	17.21	24.7133	0.522043	0.000779804	0.00669101	SOX2	sex determining region Y-box 2 [Sus scrofa]	Environmental Information Processing;Cellular Processes	Signal transduction;Cellular community - eukaryotes	ko04390//Hippo signaling pathway;ko04550//Signaling pathways regulating pluripotency of stem cells	K16796;K16796	-	-	-
LOC100151976	235	246	301	235	221	213	3.83	3.4	4.2	2.92	2.9	3.07	3.81	2.96333	-0.36257	0.000782338	0.00670321	ALDH1L2	PREDICTED: mitochondrial 10-formyltetrahydrofolate dehydrogenase isoform X1 [Sus scrofa]	Metabolism	Metabolism of cofactors and vitamins	ko00670//One carbon pool by folate	K00289	-	-	-
LOC100152804	337	365	316	336	289	277	11.02	10.11	8.83	8.36	7.6	7.99	9.98667	7.98333	-0.323012	0.000785082	0.00672195	TACC2	transforming acidic coiled-coil-containing protein 2 [Sus scrofa]	-	-	-	-	-	-	-
LOC100625756	381	484	482	683	613	586	7.87	8.48	8.51	10.75	10.19	10.69	8.28667	10.5433	0.347467	0.000803833	0.00686301	Fam91a1	PREDICTED: protein FAM91A1 [Sus scrofa]	-	-	-	-	-	-	-
LOC100521665	86	88	73	159	156	126	7.7	6.7	5.68	10.37	11.69	9.98	6.69333	10.68	0.674115	0.000805023	0.00686831	TPPP3	PREDICTED: tubulin polymerization-promoting protein family member 3 [Sus scrofa]	-	-	-	-	-	-	-
LOC110255248	8	6	17	35	30	37	0.4	0.25	0.74	1.34	1.21	1.65	0.463333	1.4	1.5953	0.000806251	0.00686908	ZNF23	PREDICTED: zinc finger protein 23 isoform X1 [Sus scrofa]	-	-	-	-	-	-	-
LOC100152904	275	330	332	533	465	379	3.81	3.87	3.94	5.63	5.17	4.62	3.87333	5.14	0.408193	0.000817097	0.00695657	Arid1b	PREDICTED: AT-rich interactive domain-containing protein 1B isoform X2 [Tursiops truncatus]	Organismal Systems;Human Diseases	Environmental adaptation;Cancers	ko04714//Thermogenesis;ko05225//Hepatocellular carcinoma	K11653;K11653	-	-	-
LOC100518152	680	731	720	1028	913	969	13.66	13.12	12.69	15.97	15.24	17.55	13.1567	16.2533	0.304942	0.000820054	0.00697682	NECTIN3	PREDICTED: nectin-3 isoform X1 [Odobenus rosmarus divergens]	Environmental Information Processing;Cellular Processes	Signaling molecules and interaction;Cellular community - eukaryotes	ko04514//Cell adhesion molecules (CAMs);ko04520//Adherens junction	K06592;K06592	-	-	-
LOC100516495	411	434	473	672	580	609	8.11	7.32	7.89	10.13	9.04	10.57	7.77333	9.91333	0.350837	0.000822063	0.00698898	EIF4G3	PREDICTED: eukaryotic translation initiation factor 4 gamma 3 isoform X14 [Vicugna pacos]	Genetic Information Processing;Human Diseases	Translation;Cardiovascular diseases	ko03013//RNA transport;ko05416//Viral myocarditis	K03260;K03260	-	-	-
LOC100154739	155	189	163	266	263	265	4.29	4.43	3.86	5.6	5.86	6.47	4.19333	5.97667	0.511244	0.000831674	0.00705578	SFI1	PREDICTED: protein SFI1 homolog isoform X6 [Sus scrofa]	-	-	-	-	-	-	-
LOC100517858	37	38	50	21	24	20	1.05	0.92	1.21	0.45	0.55	0.5	1.06	0.5	-1.08406	0.000843757	0.00714823	C3orf58	PREDICTED: deleted in autism protein 1 isoform X1 [Callithrix jacchus]	-	-	-	-	-	-	-
LOC100524443	190	229	187	365	309	267	5.55	5.66	4.67	8.07	7.28	6.8	5.29333	7.38333	0.480096	0.000850963	0.00719917	ACAP3	PREDICTED: arf-GAP with coiled-coil, ANK repeat and PH domain-containing protein 3 isoform X1 [Sus scrofa]	Cellular Processes	Transport and catabolism	ko04144//Endocytosis	K12489	-	-	-
LOC397589	284	306	340	268	252	288	35.53	33.36	35.34	25.49	26.13	31.93	34.7433	27.85	-0.319059	0.000854416	0.00721321	CDKN3	cyclin-dependent kinase inhibitor 3 [Sus scrofa]	-	-	-	-	-	-	-
LOC100517992	359	394	396	362	316	357	21.05	19.61	19.84	16.16	14.91	18.47	20.1667	16.5133	-0.288341	0.000866605	0.0072906	MPP1	PREDICTED: 55 kDa erythrocyte membrane protein [Sus scrofa]	-	-	-	-	-	-	-
LOC100127155	839	949	896	1287	1178	1108	69.21	64.4	61.48	81.02	77.43	80.74	65.03	79.73	0.294017	0.000867346	0.00729175	LMO4	LIM domain transcription factor LMO4 [Myotis brandtii]	-	-	-	-	-	-	-
LOC100151872	767	999	903	1304	1176	1083	27.35	30.16	27.45	35.38	33.67	34.06	28.32	34.37	0.279329	0.00087015	0.00731023	TMEM63B	PREDICTED: CSC1-like protein 2 isoform X2 [Sus scrofa]	-	-	-	-	-	-	-
LOC100156966	338	394	399	557	585	474	9.19	9.2	9.6	11.53	12.83	11.62	9.33	11.9933	0.362284	0.000871859	0.00731949	EDC3	PREDICTED: enhancer of mRNA-decapping protein 3 [Sus scrofa]	Genetic Information Processing	Folding, sorting and degradation	ko03018//RNA degradation	K12615	-	-	-
LOC100739314	91	129	121	186	189	190	1.43	1.73	1.64	2.24	2.4	2.65	1.6	2.43	0.602884	0.000876892	0.00734641	PAIP2B	PREDICTED: polyadenylate-binding protein-interacting protein 2B isoform X1 [Sus scrofa]	-	-	-	-	-	-	-
LOC100620214	134	151	161	251	231	223	2.86	2.66	2.98	3.86	3.78	3.9	2.83333	3.84667	0.441108	0.000878075	0.00735121	TFDP2	PREDICTED: transcription factor Dp-2 isoform X4 [Mustela putorius furo]	Cellular Processes	Cell growth and death	ko04110//Cell cycle	K09392	-	-	-
LOC100152768	520	574	548	805	758	699	13.33	12.47	12	15.7	15.63	15.81	12.6	15.7133	0.318566	0.000882497	0.00738087	IRF2BPL	PREDICTED: interferon regulatory factor 2-binding protein-like [Sus scrofa]	-	-	-	-	-	-	-
LOC100156292	417	493	535	705	706	603	29.93	29.99	32.82	38.52	40.77	38.19	30.9133	39.16	0.341152	0.000882841	0.00738087	BYSL	PREDICTED: bystin [Sus scrofa]	-	-	-	-	-	-	-
LOC100511862	169	191	206	312	286	268	5.56	5.35	5.84	7.79	7.79	7.85	5.58333	7.81	0.484196	0.000896003	0.00748431	MUM1	PREDICTED: PWWP domain-containing protein MUM1 isoform X1 [Sus scrofa]	-	-	-	-	-	-	-
LOC100516719	9	28	20	57	46	46	0.23	0.6	0.43	1.11	0.94	1.02	0.42	1.02333	1.28481	0.000896455	0.00748431	ENTPD8	PREDICTED: ectonucleoside triphosphate diphosphohydrolase 8 [Sus scrofa]	Human Diseases;Metabolism;Metabolism	Infectious diseases;Nucleotide metabolism;Nucleotide metabolism	ko05169//Epstein-Barr virus infection;ko00230//Purine metabolism;ko00240//Pyrimidine metabolism	K01510;K01510;K01510	-	-	-
LOC100155667	17	10	12	48	34	34	0.56	0.27	0.34	1.16	0.88	0.96	0.39	1	1.35845	0.00095195	0.00790657	RWDD2A	PREDICTED: RWD domain-containing protein 2A [Sus scrofa]	-	-	-	-	-	-	-
LOC100158156	303	366	402	345	272	327	23.98	24.56	27.19	20.79	17.32	22.84	25.2433	20.3167	-0.313239	0.000952275	0.00790657	GPN3	GPN-loop GTPase 3 [Sus scrofa]	-	-	-	-	-	-	-
LOC768099	333	321	339	531	514	413	14.44	11.83	12.59	17.59	17.97	15.84	12.9533	17.1333	0.403482	0.000952996	0.00790711	TFIP11	tuftelin-interacting protein 11 [Sus scrofa]	-	-	-	-	-	-	-
LOC733694	78	66	67	52	42	42	5.96	4.42	4.38	3.01	2.82	2.84	4.92	2.89	-0.767589	0.000958248	0.00793977	AKR1C1	PREDICTED: dihydrodiol dehydrogenase 3-like [Sus scrofa]	Metabolism;Metabolism;Metabolism;Organismal Systems;Metabolism	Global and overview maps;Lipid metabolism;Lipid metabolism;Endocrine system;Metabolism of cofactors and vitamins	ko01100//Metabolic pathways;ko00590//Arachidonic acid metabolism;ko00140//Steroid hormone biosynthesis;ko04913//Ovarian Steroidogenesis;ko00790//Folate biosynthesis	K04119;K04119;K04119;K04119;K04119	-	-	-
LOC100627513	321	399	367	296	345	321	12.95	13.65	12.65	9.09	11.2	11.43	13.0833	10.5733	-0.3073	0.000960718	0.00794932	STOM	PREDICTED: erythrocyte band 7 integral membrane protein [Sus scrofa]	-	-	-	-	-	-	-
LOC100151888	179	253	209	175	169	183	2.85	3.42	2.85	2.12	2.17	2.57	3.04	2.28667	-0.410825	0.000967492	0.00799988	ZBTB10	PREDICTED: zinc finger and BTB domain-containing protein 10 isoform X1 [Sus scrofa]	-	-	-	-	-	-	-
LOC396994	407	600	533	757	742	656	20.9	23.38	23.93	25.58	28.92	28.38	22.7367	27.6267	0.281041	0.000979847	0.00809649	SLC35A4	probable UDP-sugar transporter protein SLC35A4 [Sus scrofa]	-	-	-	-	-	-	-
LOC100620405	632	729	758	1000	903	974	8.36	8.17	8.58	10.07	9.6	11.38	8.37	10.35	0.306331	0.000982141	0.00810989	USP24	PREDICTED: ubiquitin carboxyl-terminal hydrolase 24 isoform X1 [Homo sapiens]	-	-	-	-	-	-	-
LOC100519474	560	689	656	969	919	733	8.63	8.96	8.62	11.32	11.38	9.95	8.73667	10.8833	0.316966	0.00099461	0.00820162	PRSS22	PREDICTED: brain-specific serine protease 4 isoform X1 [Sus scrofa]	-	-	-	-	-	-	-
LOC100518827	79	100	103	84	55	58	7.78	8.35	8.67	6.3	4.36	5.04	8.26667	5.23333	-0.659576	0.000998249	0.00822601	--	PREDICTED: uncharacterized protein LOC100518827 [Sus scrofa]	-	-	-	-	-	-	-
LOC100624678	172	204	185	294	300	266	9.14	9.19	8.75	11.92	12.87	12.73	9.02667	12.5067	0.470432	0.000999517	0.00823083	CLN8	protein CLN8 [Sus scrofa]	-	-	-	-	-	-	-
LOC100526236	440	487	449	717	626	588	14.08	13.21	12.28	17.47	16.12	16.61	13.19	16.7333	0.34328	0.00100026	0.00823133	ENDOD1	PREDICTED: endonuclease domain-containing 1 protein [Sus scrofa]	-	-	-	-	-	-	-
LOC100153933	40	44	61	36	27	15	0.83	0.78	1.09	0.57	0.45	0.28	0.9	0.433333	-1.05445	0.00100169	0.00823535	NES	PREDICTED: nestin [Sus scrofa]	-	-	-	-	-	-	-
LOC397351	302	401	445	387	315	321	23.83	26.6	29.85	23.02	20.28	22.28	26.76	21.86	-0.291785	0.00100211	0.00823535	HPRT1	hypoxanthine-guanine phosphoribosyltransferase [Sus scrofa]	Metabolism;Metabolism;Metabolism	Global and overview maps;Nucleotide metabolism;Xenobiotics biodegradation and metabolism	ko01100//Metabolic pathways;ko00230//Purine metabolism;ko00983//Drug metabolism - other enzymes	K00760;K00760;K00760	-	-	-
LOC100739567	626	821	712	971	1003	976	20.88	22.75	20.15	24.45	27.14	29.6	21.26	27.0633	0.348198	0.00100331	0.00823671	Ccnl2	PREDICTED: cyclin-L2 isoform X1 [Bubalus bubalis]	-	-	-	-	-	-	-
LOC100518446	176	236	215	185	174	166	12.3	13.98	12.9	9.83	9.82	10.3	13.06	9.98333	-0.387561	0.00100364	0.00823671	PHF11	PHD finger protein 11 [Sus scrofa]	-	-	-	-	-	-	-
LOC100623208	120	125	124	101	97	83	3.48	3.07	3.07	2.23	2.26	2.12	3.20667	2.20333	-0.541387	0.00100763	0.00826378	Etv5	PREDICTED: ETS translocation variant 5 isoform X1 [Orcinus orca]	Human Diseases;Human Diseases	Cancers;Cancers	ko05202//Transcriptional misregulation in cancers;ko05215//Prostate cancer	K15593;K15593	-	-	-
LOC100622040	109	122	101	190	184	179	4.48	4.25	3.55	5.95	6.09	6.5	4.09333	6.18	0.594331	0.00100899	0.00826934	CSTF3	cleavage stimulation factor subunit 3 isoform 1 [Homo sapiens]	Genetic Information Processing	Translation	ko03015//mRNA surveillance pathway	K14408	-	-	-
LOC100520358	510	652	624	902	817	722	10.03	10.87	10.49	13.51	12.93	12.53	10.4633	12.99	0.312059	0.00101361	0.00829591	CDC42BPG	PREDICTED: serine/threonine-protein kinase MRCK gamma isoform X3 [Sus scrofa]	-	-	-	-	-	-	-
LOC100518840	1	6	4	19	21	17	0.02	0.11	0.07	0.31	0.36	0.32	0.0666667	0.33	2.30743	0.00101676	0.00831608	PMFBP1	PREDICTED: polyamine-modulated factor 1-binding protein 1 [Sus scrofa]	-	-	-	-	-	-	-
LOC100512677	295	315	331	513	429	422	5.36	4.88	5.14	7.12	6.27	6.77	5.12667	6.72	0.39044	0.00102257	0.00835416	Rptor	PREDICTED: regulatory-associated protein of mTOR isoform X1 [Bubalus bubalis]	Environmental Information Processing;Organismal Systems;Human Diseases;Environmental Information Processing;Organismal Systems;Cellular Processes;Environmental Information Processing;Organismal Systems;Organismal Systems;Cellular Processes	Signal transduction;Environmental adaptation;Cancers;Signal transduction;Endocrine system;Transport and catabolism;Signal transduction;Aging;Aging;Transport and catabolism	ko04151//PI3K-Akt signaling pathway;ko04714//Thermogenesis;ko05206//MicroRNAs in cancer;ko04150//mTOR signaling pathway;ko04910//Insulin signaling pathway;ko04140//Autophagy - animal;ko04152//AMPK signaling pathway;ko04211//Longevity regulating pathway - mammal;ko04213//Longevity regulating pathway - multiple species;ko04136//Autophagy - other eukaryotes	K07204;K07204;K07204;K07204;K07204;K07204;K07204;K07204;K07204;K07204	-	-	-
LOC110257220	78	83	70	51	44	57	3.97	3.58	3.05	1.98	1.8	2.56	3.53333	2.11333	-0.74151	0.0010228	0.00835416	MSX2	PREDICTED: homeobox protein MSX-2 [Ailuropoda melanoleuca]	Human Diseases	Infectious diseases	ko05166//HTLV-I infection	K09341	-	-	-
LOC100622469	61	109	95	182	139	145	3.78	5.73	5.04	8.6	6.94	7.94	4.85	7.82667	0.690413	0.00102959	0.00839819	METTL1	PREDICTED: LOW QUALITY PROTEIN: tRNA (guanine-N(7)-)-methyltransferase [Sus scrofa]	-	-	-	-	-	-	-
LOC449525	154	204	197	169	157	129	16.69	18.74	18.24	13.94	13.69	12.34	17.89	13.3233	-0.425198	0.00103259	0.00841701	HILPDA	hypoxia-inducible lipid droplet-associated protein [Sus scrofa]	-	-	-	-	-	-	-
LOC100519695	89	133	98	76	84	69	3.47	4.4	3.27	2.26	2.64	2.38	3.71333	2.42667	-0.613739	0.00104033	0.00846868	TSPYL2	PREDICTED: testis-specific Y-encoded-like protein 2 isoform X1 [Sus scrofa]	-	-	-	-	-	-	-
LOC106508661	405	461	454	683	626	540	3.9	3.77	3.75	4.98	4.86	4.61	3.80667	4.81667	0.339507	0.00104484	0.00849964	FREM2	PREDICTED: FRAS1-related extracellular matrix protein 2 [Orcinus orca]	-	-	-	-	-	-	-
MSTRG.7175	89	92	114	89	43	67	2.04	1.79	2.24	1.55	0.79	1.36	2.02333	1.23333	-0.714171	0.00106623	0.00865613	DENND2C	PREDICTED: DENN domain-containing protein 2C isoform X1 [Bos taurus]	-	-	-	-	-	-	GO:0043087//regulation of GTPase activity
LOC100620218	223	302	266	216	245	216	19.12	21.95	19.51	14.08	16.87	16.35	20.1933	15.7667	-0.357001	0.0010842	0.00877247	BORCS8	PREDICTED: protein MEF2BNB isoform X1 [Sus scrofa]	-	-	-	-	-	-	-
LOC100519339	57	48	59	34	35	29	2.81	2.01	2.49	1.28	1.39	1.26	2.43667	1.31	-0.895342	0.00109193	0.00882318	TFCP2L1	PREDICTED: transcription factor CP2-like protein 1 isoform X3 [Sus scrofa]	-	-	-	-	-	-	-
LOC100517031	13	20	21	50	39	49	0.36	0.48	0.5	1.07	0.88	1.21	0.446667	1.05333	1.23769	0.00109763	0.00886337	BCL2L15	PREDICTED: bcl-2-like protein 15 [Sus scrofa]	-	-	-	-	-	-	-
LOC100153880	441	460	527	713	658	618	3.44	3.04	3.51	4.24	4.13	4.26	3.33	4.21	0.338298	0.00109906	0.0088689	HMBOX1	PREDICTED: homeobox-containing protein 1 isoform X1 [Sus scrofa]	-	-	-	-	-	-	-
LOC100513583	146	142	124	109	82	116	6.58	4.6	5.23	3.83	2.77	4.37	5.47	3.65667	-0.581012	0.00110686	0.00891995	PRRG4	transmembrane gamma-carboxyglutamic acid protein 4 precursor [Sus scrofa]	-	-	-	-	-	-	-
LOC100152772	717	764	774	1072	1031	928	13.05	11.79	12.04	14.85	15.1	14.91	12.2933	14.9533	0.282591	0.00111414	0.00897263	NEK9	PREDICTED: serine/threonine-protein kinase Nek9 [Sus scrofa]	-	-	-	-	-	-	-
LOC100525074	43	57	52	105	94	91	1.42	1.57	1.46	2.6	2.45	2.61	1.48333	2.55333	0.783539	0.00111888	0.00900479	TTC25	PREDICTED: tetratricopeptide repeat protein 25 isoform X1 [Sus scrofa]	-	-	-	-	-	-	-
LOC100519866	356	392	380	580	503	519	10.11	9.36	9.16	12.54	11.45	13.04	9.54333	12.3433	0.371167	0.00112839	0.0090753	MPHOSPH8	PREDICTED: M-phase phosphoprotein 8 isoform X1 [Sus scrofa]	-	-	-	-	-	-	-
LOC100512219	239	272	275	421	395	338	4.23	4.07	4.15	5.65	5.61	5.26	4.15	5.50667	0.408068	0.00114037	0.00915333	POM121	PREDICTED: nuclear envelope pore membrane protein POM 121C [Sus scrofa]	Genetic Information Processing	Translation	ko03013//RNA transport	K14316	-	-	-
LOC100155883	368	402	448	373	395	347	39.62	36.68	41.21	30.57	34.2	32.96	39.17	32.5767	-0.26591	0.00114523	0.00918008	NANS	sialic acid synthase [Sus scrofa]	Metabolism;Metabolism	Global and overview maps;Carbohydrate metabolism	ko01100//Metabolic pathways;ko00520//Amino sugar and nucleotide sugar metabolism	K05304;K05304	-	-	-
LOC100620310	313	370	375	348	337	274	21.76	20.79	22.16	18.43	18.55	16.44	21.57	17.8067	-0.276609	0.0011528	0.009223	CLEC11A	PREDICTED: C-type lectin domain family 11 member A isoform X1 [Sus scrofa]	-	-	-	-	-	-	-
LOC100525976	460	612	609	862	782	674	27.59	31.1	31.18	39.4	37.8	35.57	29.9567	37.59	0.327472	0.00115385	0.009223	UCK1	PREDICTED: uridine-cytidine kinase 1 isoform X2 [Sus scrofa]	Metabolism;Metabolism;Metabolism	Global and overview maps;Nucleotide metabolism;Xenobiotics biodegradation and metabolism	ko01100//Metabolic pathways;ko00240//Pyrimidine metabolism;ko00983//Drug metabolism - other enzymes	K00876;K00876;K00876	-	-	-
LOC396583	83	124	114	87	80	67	5.7	7.22	6.7	4.55	4.42	4.06	6.54	4.34333	-0.590488	0.0011544	0.009223	SNAI1	PREDICTED: zinc finger protein SNAI1 [Lipotes vexillifer]	Cellular Processes	Cellular community - eukaryotes	ko04520//Adherens junction	K05707	-	-	-
LOC100623182	335	443	400	571	581	512	13.96	15.65	14.25	18.11	19.46	18.83	14.62	18.8	0.362789	0.00116196	0.00927108	ZNF219	PREDICTED: zinc finger protein 219 isoform X1 [Balaenoptera acutorostrata scammoni]	-	-	-	-	-	-	-
LOC100626826	472	488	536	758	688	629	21.35	18.72	20.75	26.14	25.05	25.11	20.2733	25.4333	0.327137	0.00116485	0.009288	Lsm14b	PREDICTED: protein LSM14 homolog B isoform X1 [Papio anubis]	-	-	-	-	-	-	-
LOC100622743	108	118	109	90	83	78	2.2	1.94	1.88	1.26	1.29	1.33	2.00667	1.29333	-0.633707	0.00116647	0.00929475	RAB11FIP5	PREDICTED: rab11 family-interacting protein 5 isoform X1 [Sus scrofa]	Cellular Processes	Transport and catabolism	ko04144//Endocytosis	K12484	-	-	-
LOC100522669	126	149	135	239	221	194	4.17	4.18	3.82	6.03	5.89	5.67	4.05667	5.86333	0.531426	0.00116937	0.00931171	CYP2W1	PREDICTED: cytochrome P450 2W1 [Sus scrofa]	-	-	-	-	-	-	-
LOC100516580	166	208	203	322	297	258	5.39	5.79	5.69	7.84	7.79	7.33	5.62333	7.65333	0.444663	0.0011723	0.00932892	MTRR	PREDICTED: methionine synthase reductase isoform X1 [Sus scrofa]	-	-	-	-	-	-	-
LOC100153655	656	866	810	1105	1021	993	27.73	29.34	28.89	34.12	33.89	36.41	28.6533	34.8067	0.280661	0.00117745	0.00935752	DCAF8	DDB1- and CUL4-associated factor 8 [Sus scrofa]	-	-	-	-	-	-	-
LOC100623776	133	157	148	135	114	98	5.8	5.81	5.52	4.49	4	3.77	5.71	4.08667	-0.482566	0.00118601	0.00941318	TICAM1	TIR domain-containing adapter molecule 1 [Sus scrofa]	Human Diseases;Human Diseases;Human Diseases;Human Diseases;Cellular Processes;Organismal Systems;Human Diseases;Human Diseases;Organismal Systems;Human Diseases;Environmental Information Processing;Human Diseases	Infectious diseases;Infectious diseases;Infectious diseases;Infectious diseases;Cell growth and death;Immune system;Infectious diseases;Infectious diseases;Immune system;Infectious diseases;Signal transduction;Infectious diseases	ko05165//Human papillomavirus infection;ko05168//Herpes simplex infection;ko05167//Kaposi sarcoma-associated herpesvirus infection;ko05164//Influenza A;ko04217//Necroptosis;ko04621//NOD-like receptor signaling pathway;ko05161//Hepatitis B;ko05160//Hepatitis C;ko04620//Toll-like receptor signaling pathway;ko05142//Chagas disease (American trypanosomiasis);ko04064//NF-kappa B signaling pathway;ko05…	K05842;K05842;K05842;K05842;K05842;K05842;K05842;K05842;K05842;K05842;K05842;K05842	-	-	-
LOC100523287	498	616	554	842	740	705	13.08	13.43	12.39	16.63	15.55	16.21	12.9667	16.13	0.314939	0.00119014	0.00943978	PKP4	PREDICTED: plakophilin-4 isoform X4 [Sus scrofa]	-	-	-	-	-	-	-
LOC396912	270	368	306	490	474	406	5.24	6.62	5.21	7.39	7.6	7.06	5.69	7.35	0.369316	0.00121245	0.00958517	GATA2	endothelial transcription factor GATA-2 [Sus scrofa]	-	-	-	-	-	-	-
LOC106507531	195	244	258	228	189	179	8.34	8.83	9.43	7.43	6.48	6.74	8.86667	6.88333	-0.365284	0.00121933	0.00963326	C1RL	PREDICTED: complement C1r subcomponent-like protein [Balaenoptera acutorostrata scammoni]	-	-	-	-	-	-	-
LOC100513588	303	363	369	568	500	419	3.53	3.53	3.64	5.04	4.72	4.23	3.56667	4.66333	0.386785	0.0012213	0.00964255	ZNF629	PREDICTED: zinc finger protein 629 [Sus scrofa]	-	-	-	-	-	-	-
LOC100523669	8	9	13	34	28	32	0.17	0.16	0.23	0.55	0.47	0.6	0.186667	0.54	1.5325	0.00122241	0.00964495	NUAK1	PREDICTED: NUAK family SNF1-like kinase 1 isoform X1 [Sus scrofa]	-	-	-	-	-	-	-
LOC100736828	331	365	367	554	474	485	15.45	14.46	14.66	19.7	17.82	20	14.8567	19.1733	0.367991	0.00124642	0.00982156	C6orf120	PREDICTED: UPF0669 protein C6orf120 homolog [Sus scrofa]	-	-	-	-	-	-	-
LOC100518082	125	177	168	137	123	115	3.22	3.86	3.7	2.69	2.55	2.61	3.59333	2.61667	-0.457593	0.00124901	0.00983557	SEL1L3	protein sel-1 homolog 3 [Bos taurus]	-	-	-	-	-	-	-
LOC100624184	131	148	131	240	198	220	1.43	1.38	1.22	1.98	1.75	2.1	1.34333	1.94333	0.532716	0.00125794	0.00988075	TNRC6C	PREDICTED: trinucleotide repeat-containing gene 6C protein isoform X1 [Canis lupus familiaris]	-	-	-	-	-	-	-
LOC110256977	164	242	242	344	350	288	5.36	6.79	6.85	8.61	9.28	8.42	6.33333	8.77	0.469612	0.00125812	0.00988075	ING5	PREDICTED: inhibitor of growth protein 5 isoform X1 [Ceratotherium simum simum]	-	-	-	-	-	-	-
LOC100037949	161	241	213	189	141	171	6.68	8.55	7.3	5.71	4.69	5.94	7.51	5.44667	-0.463439	0.00125917	0.00988075	UIMC1	BRCA1-A complex subunit RAP80 [Sus scrofa]	Genetic Information Processing	Replication and repair	ko03440//Homologous recombination	K20775	-	-	-
LOC110260627	659	678	721	1019	923	847	14.72	12.84	13.77	17.33	16.59	16.7	13.7767	16.8733	0.292518	0.00125999	0.00988075	TOB2	PREDICTED: protein Tob2 [Mesocricetus auratus]	Genetic Information Processing	Folding, sorting and degradation	ko03018//RNA degradation	K14443	-	-	-
LOC100523988	132	168	139	250	213	234	3.83	4.26	3.22	5.15	4.72	5.95	3.77	5.27333	0.484151	0.00126432	0.00990435	TMEM63A	PREDICTED: CSC1-like protein 1 isoform X1 [Sus scrofa]	-	-	-	-	-	-	-
LOC102164011	27	36	30	13	14	16	1.37	1.52	1.26	0.51	0.55	0.68	1.38333	0.58	-1.25402	0.00127191	0.0099574	POLR2L	PREDICTED: LOW QUALITY PROTEIN: DNA-directed RNA polymerases I, II, and III subunit RPABC5-like [Sus scrofa]	Metabolism;Human Diseases;Human Diseases;Metabolism;Metabolism;Organismal Systems;Genetic Information Processing	Global and overview maps;Infectious diseases;Neurodegenerative diseases;Nucleotide metabolism;Nucleotide metabolism;Immune system;Transcription	ko01100//Metabolic pathways;ko05169//Epstein-Barr virus infection;ko05016//Huntington disease;ko00230//Purine metabolism;ko00240//Pyrimidine metabolism;ko04623//Cytosolic DNA-sensing pathway;ko03020//RNA polymerase	K03007;K03007;K03007;K03007;K03007;K03007;K03007	-	-	-
LOC102161224	32	47	36	80	79	75	0.39	0.49	0.38	0.75	0.78	0.81	0.42	0.78	0.893085	0.00127632	0.00997894	CFAP54	PREDICTED: cilia- and flagella-associated protein 54 [Orcinus orca]	-	-	-	-	-	-	-
LOC110260882	244	273	327	438	375	438	16.29	15.45	18.65	22.26	20.14	25.8	16.7967	22.7333	0.436634	0.00128133	0.010006	RNF166	PREDICTED: RING finger protein 166 isoform X1 [Rousettus aegyptiacus]	-	-	-	-	-	-	-
LOC100513214	189	261	241	353	339	335	6.48	9.03	8.56	10.32	11.07	11.73	8.02333	11.04	0.460467	0.00129847	0.0101128	PCGF3	PREDICTED: polycomb group RING finger protein 3 [Sus scrofa]	Cellular Processes	Cellular community - eukaryotes	ko04550//Signaling pathways regulating pluripotency of stem cells	K11488	-	-	-
LOC100623142	129	156	159	117	122	114	3.73	3.81	3.93	2.58	2.78	2.85	3.82333	2.73667	-0.482411	0.0013003	0.0101205	ABHD10	PREDICTED: mycophenolic acid acyl-glucuronide esterase, mitochondrial [Sus scrofa]	-	-	-	-	-	-	-
LOC100301483	30	28	39	17	13	16	9.64	7.62	10.71	4.16	3.36	4.53	9.32333	4.01667	-1.21485	0.00130508	0.0101512	S100A12	protein S100-A12 [Sus scrofa]	-	-	-	-	-	-	-
LOC100156073	92	84	100	182	137	157	2.83	2.19	2.63	4.25	3.39	4.25	2.55	3.96333	0.636217	0.00130992	0.0101823	IFI16	PREDICTED: gamma-interferon-inducible protein 16 [Sus scrofa]	Organismal Systems	Immune system	ko04621//NOD-like receptor signaling pathway	K20914	-	-	-
LOC100519298	215	242	261	246	197	174	9.16	8.73	9.51	8.02	6.76	6.57	9.13333	7.11667	-0.35994	0.00131597	0.0102227	ARRDC2	PREDICTED: arrestin domain-containing protein 2 isoform X1 [Sus scrofa]	-	-	-	-	-	-	-
LOC100739155	172	186	198	302	270	275	5.31	4.87	5.22	7.1	6.71	7.49	5.13333	7.1	0.467923	0.00131733	0.0102266	Mxd4	PREDICTED: max dimerization protein 4 [Sus scrofa]	-	-	-	-	-	-	-
LOC100526118	34	22	26	11	13	11	3.74	2.07	2.45	0.93	1.15	1.08	2.75333	1.05333	-1.38622	0.00132785	0.0102807	GSTA1	PREDICTED: glutathione S-transferase A1-like [Sus scrofa]	Human Diseases;Human Diseases;Human Diseases;Human Diseases;Human Diseases;Human Diseases;Metabolism;Metabolism;Metabolism;Metabolism	Cancers;Cancers;Cardiovascular diseases;Cancers;Cancers;Drug resistance;Xenobiotics biodegradation and metabolism;Xenobiotics biodegradation and metabolism;Xenobiotics biodegradation and metabolism;Metabolism of other amino acids	ko05200//Pathways in cancer;ko05225//Hepatocellular carcinoma;ko05418//Fluid shear stress and atherosclerosis;ko05215//Prostate cancer;ko05204//Chemical carcinogenesis;ko01524//Platinum drug resistance;ko00983//Drug metabolism - other enzymes;ko00980//Metabolism of xenobiotics by cytochrome P450;ko00982//Drug metabolism - cytochrome P450;ko00480//Glutathione metabolism	K00799;K00799;K00799;K00799;K00799;K00799;K00799;K00799;K00799;K00799	-	-	-
LOC100525456	234	284	269	428	403	327	7.16	7.37	7.04	9.97	9.92	8.83	7.19	9.57333	0.41303	0.00132855	0.0102807	GLYR1	Cytokine-like nuclear factor n-pac [Homo sapiens]	-	-	-	-	-	-	-
LOC100532728	188	267	227	205	193	181	10.2	12.35	10.53	8.34	8.44	8.53	11.0267	8.43667	-0.386252	0.00133311	0.0103094	TMEM50B	transmembrane protein 50B [Homo sapiens]	-	-	-	-	-	-	-
LOC100623550	247	268	326	428	408	393	1.99	1.83	2.24	2.63	2.64	2.79	2.02	2.68667	0.411462	0.00134139	0.0103667	Rrp8	PREDICTED: ribosomal RNA-processing protein 8 [Sus scrofa]	-	-	-	-	-	-	-
LOC100519308	26	61	46	27	24	18	0.84	1.67	1.27	0.66	0.62	0.51	1.26	0.596667	-1.07843	0.00134831	0.0104003	AKNAD1	PREDICTED: protein AKNAD1 isoform X3 [Sus scrofa]	-	-	-	-	-	-	-
LOC100736954	155	207	208	168	165	140	15.31	17.33	17.56	12.63	13.11	12.2	16.7333	12.6467	-0.403968	0.00136259	0.0104903	PDE6D	PREDICTED: retinal rod rhodopsin-sensitive cGMP 3',5'-cyclic phosphodiesterase subunit delta [Sus scrofa]	Metabolism	Nucleotide metabolism	ko00230//Purine metabolism	K13758	-	-	-
[truncated: 131 more rows]
